# Supplementary material for: Distinct Metabolic Signals Underlie Clone by Environment Interplay in “Nebbiolo” Grapes Over Ripening
Source: Front Plant Sci. 2019 Dec 4;10:1575. doi: 10.3389/fpls.2019.01575 (PMC6904956; doi:10.3389/fpls.2019.01575)
Supplement: Supplementary file 2 [file DataSheet_2.xlsx]

## Sheet: Carbohydrate metabolism
Table S5. Functional categories of genes expressed in 'Nebbiolo' berries collected at three developmental stages (E-L31, E-L35, E-L38) in different vineyards (V1, V2, V3) from three clones (CVT185, CVT423, CVT71). Values (FPKM) are the mean of three biological replicates. Conversion between the modified E-L scheme and the extended BBCH scheme is as it follows: E-L31 = 75 BBCH; E-L35 = 81 BBCH; E-…
a) List of genes belonging to the functional category of Carbohydrate metabolic process (GO:0005975)
		CVT185									CVT423									CVT71
		E-L31			E-L35			E-L38			E-L31			E-L35			E-L38			E-L31			E-L35			E-L38
GGDB 12X V1 ID	Gene description	V1	V2	V3	V1	V2	V3	V1	V2	V3	V1	V2	V3	V1	V2	V3	V1	V2	V3	V1	V2	V3	V1	V2	V3	V1	V2	V3
VIT_00s0346g00110	Mannitol dehydrogenase	0.018134	0.0576148666666667	0.0654785	2.35454	2.57248	1.50084	0.155801	0.346147	0.395605	0.0624819	0.0526681	0.0932628	2.74036	2.77525	1.80257	0.351218	0.640057	0.433652	0.0750827	0.0159584	0.0588564	2.02906	2.92188	1.6747	0.586554	0.420133	0.680399
VIT_07s0005g01300	Auxin-induced beta-glucosidase	0.0282055	0.113372	0.0828786	0.293333	0.622111	0.305429	0.0248091	0.0653721	0.0805387	0.166393	0.437646	0.0487653	0.644467	0.308829	0.124388	0.100006	0.0783422	0.0685913	0.206165	0.174652	0.0230297	0.54375	0.572128	0.537644	0.0802141	0.0815737	0.0617356
VIT_10s0003g02500	Malate dehydrogenase, cytoplasmic 1	0.0320675	0.0974133	0.0492404	0.052263	0.0435126	0.0824351	0.0128447	0.0346714	0.0302305	0.0678765	0.0435029	0.0302142	0.104674	0.0568081	0.0608908	0.0312031	0.0835151	0.0500144	0.0095897	0.0689862	0.01213	0.073923	0.118094	0.0466149	0.0978015	0.0483723	0.0921295
VIT_00s0324g00050	UDP-glucose glucosyltransferase	0.0350341	0.0583521	0.0346776	39.3398	51.7795	5.14904	4.34808	9.05962	10.5494	0.102098	0.393338	0.052996	18.2118	26.1148	5.91234	7.20773	17.5245	11.3452	0.0690026	0.0377207	0.0227903	12.9367	26.3184	0.684349	5.91926	20.7847	9.94935
VIT_05s0077g00430	Galactinol synthase	0.0394747	0.0147866	0.0773424	5.3378	15.7265	9.40008	0.232445	0.748857	10.9159	0.028293	0.0809476	0.0447598	6.53471	15.4053	34.8382	0.285129	0.602553	8.90368	0.377388	0.0944321	0.0195582	22.8324	28.9599	9.89505	0.675506	1.45999	14.9735
VIT_08s0007g04580	UGT73C2 (UDP-glucosyl transferase 73C2)	0.0460567	0.130988	0.253304	3.16649	2.64853	3.16796	2.01945	1.55004	0.973621	0.211086	0.0575208	0.0613683	3.08676	3.21476	6.02613	2.54504	2.17292	1.24784	0.0666434	0.0595332	0.33182	1.99429	2.85072	2.76511	0.991293	1.48752	1.15259
VIT_17s0000g04760	UDP-glycosyltransferase 89B2	0.0595115	0.0818461	0.0641174	1.61008	2.47014	2.22479	1.37765	1.72373	1.83958	0.0995036	0.125608	0.062073	1.18093	0.88717	4.86711	1.25972	2.50568	4.11111	0.166739	0.100588	0.0742342	1.15438	0.634341	2.08125	1.85732	1.68152	2.85245
VIT_06s0004g06900	Pyruvate decarboxylase isozyme 1	0.0602248	0.0676505	0.119094	0.0791234	0.0978162	0.0650315	0.0530358	0.0132386	0.0448324	0.110562	0.131236	0.0754189	0.0155459	0.0563443	0.0580857	0.0740363	0.0271045	0.09754	0.0825007	0.0687145	0.128873	0.046536	0.00852303	0.134621	0.128734	0.0491947	0.0574468
VIT_05s0094g01500	ADP-glucose pyrophosphorylase, small subunit precursor	0.064257	0.0576321	0.0623588	0.0993973	0.139418	0.145855	0.172507	0.209036	0.273782	0.0801642	0.0892473	0.107265	0.0718144	0.184986	0.0758725	0.275482	0.159172	0.292525	0.0219811	0.121801	0.0425161	0.0697808	0.03551	0.0640584	0.0749734	0.224159	0.140763
VIT_18s0041g00900	UDP-glycosyltransferase 88A4	0.0901085	0.254916	0.0175116	0.0164819	0.165845	0.100268	0.075101	0.0885578	0.161215	0.275772	0.261153	0.111683	0.0969362	0.169565	0.0742292	0.0188915	0.147135	0.284078	0.151724	0.20311	0.137209	0.0593237	0.070621	0.0615007	0.16657	0.17703	0.390999
VIT_13s0067g02840	Phosphatidylinositol-4-phosphate 5-kinase	0.105017	0.0821707	0.0967635	0.885133	0.595703	0.305608	0.326914	0.557304	0.707516	0.33577	0.468053	0.0623495	0.820345	0.641287	0.358264	0.23242	0.418935	0.568698	0.169171	0.0415724	0.0744397	0.702383	0.646755	0.370511	0.18374	0.48708	0.596438
VIT_17s0000g05870	Aldose 1-epimerase protein	0.124759	0.35084	0.102956	0.0658604	0.0259232	0.0464357	0.134825	0.136898	0.119462	1.61079	3.06792	0.091423	0.0615552	0.0211078	0.1505	0.166735	0.0251414	0.155309	0.092684	0.103885	0.14337	0.27536	0.0165247	0.060049	0.0933173	0.0346766	0.127891
VIT_13s0019g02810	Glucuronosyl transferase	0.131722	0.0898276	0.119017	0.407285	0.247593	0.506231	0.376669	0.296244	0.435731	0.220707	0.160305	0.114762	0.516738	0.422928	0.499057	0.602901	0.336861	0.507169	0.198383	0.0968308	0.128697	0.186119	0.286278	0.410133	0.432054	0.1321	0.235218
VIT_07s0005g05690	Trehalose 6-phosphate synthase	0.134075	0.0868967	0.156492	0.102262	0.0863877	0.295597	0.250921	0.348022	0.328807	0.138225	0.156681	0.175724	0.0370217	0.200877	0.250124	0.43526	0.474528	0.256861	0.099074	0.197116	0.101785	0.0831023	0.160684	0.180085	0.194671	0.201699	0.244944
VIT_03s0063g00450	Alpha-amylase	0.153791	0.0602763	0.137654	0.504994	1.11395	0.407956	0.884472	2.36262	4.55034	0.204355	0.230241	0.140955	0.420371	0.990304	0.947981	0.699497	1.77167	4.37218	0.408716	0.0984742	0.0933241	0.332457	0.806725	0.350686	1.5913	2.01357	4.93199
VIT_00s0357g00080	Glucan 1,3-beta-glucosidase	0.155327	0.511477	0.207975	0.180561	0.246496	0.312388	0.0146147	0.0458019	0.012121	0.362944	0.27575	0.208215	0.438316	0.34022	0.266696	0.0710353	0.0439157	0.115907	0.229451	0.483733	0.255995	0.289026	0.35694	0.235402	0.0807281	0.0483207	0.0323217
VIT_00s1959g00010	UDP-N-acetylglucosamine pyrophosphorylase	0.155349	0.315219	0.340694	0.503881	0.748246	0.454335	2.1768	2.13903	2.74429	0.26547	0.629882	0.555044	0.367156	0.659628	0.418304	2.26248	1.67207	2.1151	0.485696	0.143031	0.326877	0.496277	0.427082	0.173144	2.95615	2.70194	1.67254
VIT_14s0081g00020	Pathogenesis-related protein-4 (Chitinase )	0.157345	0.314802	0.20774	35.8757	12.3532	28.9447	33.7881	27.287	45.9276	0.145193	0.0824393	0.0941737	41.7607	0.343317	29.892	16.5386	56.928	45.162	0.32203	0.273791	0.279056	1.29105	235.076	0.115131	42.4226	15.5495	31.0343
VIT_18s0001g02770	Alpha-L-fucosidase 2 precursor	0.17276	1.40181	0.170406	10.1494	28.5246	7.53274	2.61084	6.06894	5.28578	0.336215	1.06483	0.151367	13.5702	24.1767	10.4888	5.30407	12.4922	8.58023	0.873538	1.12875	0.15858	18.8558	28.9955	6.91286	3.99632	17.1853	9.05324
VIT_19s0014g04750	Glycosyl hydrolase family 1 protein	0.219791	0.392249	0.313429	0.495998	0.655765	0.601796	0.611482	0.730623	1.1966	0.292317	0.448853	0.346783	0.550747	0.815923	0.684544	0.473132	0.813189	1.29241	0.23981	0.347098	0.18561	0.726322	0.736195	0.502065	1.02865	1.03484	1.18491
VIT_05s0077g00840	Galactinol-raffinose galactosyltransferase	0.250292	0.346773	0.154993	0.277307	0.463438	0.298375	0.269704	0.101811	0.303871	0.243731	0.36005	0.139826	0.157613	0.279049	0.173563	0.223379	0.13583	0.150461	0.293358	0.862513	0.0972675	0.54577	0.423601	0.414387	0.225985	0.258443	0.155779
VIT_18s0075g00330	Sucrose-phosphate synthase	0.25329	0.270181	1.14586	1.82897	1.73348	2.71975	0.106801	0.254687	0.877339	0.483611	0.371164	0.701306	1.69481	1.34309	2.25548	0.454402	0.259767	0.669882	0.37904	0.241661	1.06065	1.71333	1.70808	2.87859	0.263345	0.441787	0.653451
VIT_16s0013g01890	UDP-arabinose 4-epimerase 3	0.255494	0.183306	0.100124	0.0926707	0.0710354	0.290974	0.192943	0.232547	0.574353	0.234378	0.27431	0.0937008	0.0601836	0.0488053	0.1923	0.475941	0.473187	0.407279	0.093289	0.0557005	0.0581816	0.0279508	0.131906	0.126069	0.329066	0.4127	0.592092
VIT_04s0023g02510	Glycosyl transferase family 1 protein	0.257036	0.343021	0.409693	2.45127	2.14902	1.71456	14.9716	10.7655	10.7585	1.08234	0.788624	0.397994	2.08406	2.02506	3.5064	14.4488	10.3488	10.7247	0.140141	0.147987	0.24123	1.41653	2.00417	1.15671	13.3416	11.3914	9.04845
VIT_05s0094g00330	Chitinase, class IV [Vitis vinifera]	0.259468	3.06943	0.777893	407.374	865.345	300.2	431.498	671.799	286.025	0.344792	2.18168	0.625861	575.175	584.137	387.341	550.06	609.632	231.887	1.17822	1.64597	1.46843	626.781	762.855	348.766	619.946	384.988	477.245
VIT_10s0003g02720	Beta-1,3 glucanase	0.269096	0.164692	0.223087	0.67909	1.1611	0.701437	2.10337	1.36993	1.16	0.166469	0.233426	0.0288695	0.798137	1.19662	1.10948	1.2894	0.960045	1.25256	0.334851	0.229261	0.0308661	1.05164	0.798165	0.813658	1.68668	0.948666	0.924581
VIT_17s0000g08960	Raffinose synthase	0.27367	0.136329	0.0753711	0.237232	0.246374	0.253613	0.0562556	0.0977595	0.149208	1.51108	0.0497661	0.013559	0.100749	0.0936639	0.100621	0.0855292	0.0547104	0.105762	0.140666	0.190955	0.0274937	0.127853	0.226825	0.132527	0.0085925	0.0881319	0.17722
VIT_01s0127g00610	Beta-1,3-glucanase	0.276457	0.44402	0.534159	0.639193	0.991701	0.849593	0.361232	0.227626	0.32878	0.293176	0.365617	0.353987	0.854601	0.677681	0.476979	0.258811	0.339225	0.346575	0.364046	0.280989	0.47921	0.822796	0.614379	0.563183	0.365195	0.377331	0.208591
VIT_00s0357g00060	Glycosyl hydrolase family 5 protein	0.283843	0.236748	0.373211	0.192419	0.253404	0.211731	0.544713	0.358381	0.452574	0.353699	0.479474	0.202461	0.173066	0.157054	0.362988	0.441789	0.333057	0.309877	0.240929	0.546738	0.275032	0.205955	0.256344	0.191881	0.381974	0.278699	0.492909
VIT_00s0513g00010	Glycosyl hydrolase family 43 protein	0.310542	0.37632	0.504423	0.528979	0.728179	0.46891	0.916737	0.544845	0.726236	0.449102	0.419362	0.461456	0.359217	0.351221	0.554467	0.773178	0.451486	0.522001	0.55603	0.279	0.498312	0.281578	0.425542	0.34987	1.13551	0.802776	0.722197
VIT_00s0582g00020	Acyl-coenzyme A thioesterase 9.	0.313954	0.347989	0.518678	0.225128	0.100473	0.238115	0.129736	0.164591	0.174817	0.347553	0.224392	0.303582	0.0855695	0.0797498	0.285707	0.12636	0.175332	0.165348	0.301513	0.193131	0.371921	0.0169915	0.111122	0.233308	0.14319	0.161826	0.341047
VIT_00s0233g00030	Trehalose-6-phosphate phosphatase	0.322208	0.675173	0.349402	0.470675	1.09332	0.284045	1.91143	4.47008	5.98571	0.507866	0.793166	0.270359	0.354956	0.449085	0.386452	2.09999	4.73804	5.08325	0.655659	0.444795	0.48427	0.349875	0.786368	0.211656	2.85042	8.15334	4.55662
VIT_12s0057g01410	Exostosin	0.327951	0.737543	0.320437	1.09741	1.20887	0.930342	0.916644	0.662114	0.336878	1.35378	2.82608	0.311449	1.29129	1.35731	1.01125	0.770535	0.619497	0.341849	0.430729	0.6111	0.318261	1.14254	1.22754	0.919542	0.948923	0.450952	0.615034
VIT_19s0015g01720	fructose-bisphosphate aldolase, cytoplasmic isozyme 1	0.32823	0.210341	0.468762	0.267413	0.115599	0.524339	0.52949	0.300288	0.674012	0.295002	0.174613	0.113073	0.441544	0.275887	0.761001	0.495396	0.799378	0.371925	0.366198	0.0960744	0.363814	0.296523	0.254102	0.563318	0.32098	0.717089	0.634817
VIT_02s0154g00110	Trehalose-6-phosphate phosphatase (AtTPPA)	0.335968	0.793774	0.547406	1.41135	1.49247	0.692745	2.77424	5.77725	9.10532	0.803738	0.937304	0.313835	0.474684	0.826763	0.749329	2.69902	5.2685	9.49449	0.86601	0.495813	0.719065	1.01236	1.45239	0.682479	3.41209	9.33715	6.63515
VIT_03s0017g02240	Glucan endo-1,3-beta-glucosidase precursor	0.34283	0.482747	0.107314	0.976511	1.4101	0.876424	0.0505474	0.0272925	0.0750198	0.270465	0.291972	0.128042	1.53733	1.52562	1.1912	0.0517973	0.055478	0.150903	0.489124	0.349172	0.0799224	1.38637	1.15862	0.90887	0.0199628	0.0536497	0.0868625
VIT_16s0098g01560	Glucan endo-1,3-beta-D-glucosidase	0.349645	0.252158	0.284135	0.284797	0.106893	0.0991192	0.245963	0.122517	0.112823	0.287965	0.182767	0.15538	0.326896	0.367191	0.348103	0.0853994	0.179692	0.0667618	0.356496	0.321337	0.197058	0.22257	0.165729	0.17543	0.0951677	0.0859305	0.0627692
VIT_12s0057g01420	Exostosin	0.350805	0.546316	0.129119	0.490671	0.651831	0.403265	0.622329	0.274053	0.23435	0.527284	1.34148	0.200907	0.546982	0.733959	0.565108	0.349859	0.407069	0.407649	0.188025	0.314194	0.193636	0.664638	0.750863	0.465229	0.538639	0.276816	0.215476
VIT_11s0016g04360	Glycosyl hydrolase family 17 protein	0.369555	0.326693	0.432627	0.929366	1.01425	1.38968	1.02155	1.27315	0.96364	0.550517	0.943467	0.283701	0.975608	0.877268	1.15488	0.922399	0.826223	0.976631	0.317969	0.437623	0.454872	0.846946	1.08143	1.42529	1.44872	0.891383	0.506546
VIT_15s0048g00330	GAE3 (UDP-D- glcucuronate 4-epimerase 3)	0.384388	0.296227	0.778229	0.454382	0.198707	0.30328	0.297976	0.21965	0.358129	0.548254	0.509162	0.492425	0.250259	0.475485	0.444427	0.464441	0.292008	0.555118	0.608398	0.296685	0.457475	0.200037	0.386693	0.219756	0.147318	0.280315	0.293927
VIT_06s0004g06670	Phosphoinositide-specific phospholipase C	0.387609	0.334354	0.301396	0.272745	0.421144	0.460443	0.0519397	0.11509	0.0286701	0.179519	0.255296	0.271891	0.417352	0.410426	0.385659	0.0151393	0.0615951	0.0106229	0.315071	0.311604	0.324982	0.56259	0.4005	0.341422	0.0453779	0.047096	0.0595363
VIT_09s0002g03390	Hexokinase	0.395195	0.225204	0.264168	0.0880126	0.156845	0.152014	0.0797882	0.0815813	0.120366	0.253415	0.20731	0.212431	0.241541	0.0797367	0.0543186	0.0687791	0.037458	0.146034	0.591452	0.15873	0.475723	0.151339	0.0706982	0.225406	0.0299266	0.0511592	0.147319
VIT_05s0029g00190	Glucan endo-1,3-beta-glucosidase 4 precursor	0.398586	1.16587	0.221277	0.138236	0.133144	0.236771	0.596358	0.664467	0.509214	6.86094	22.0024	0.0674405	0.284091	0.281192	0.322848	0.4354	0.589693	0.808622	0.037287	0.064854	0.124339	0.351068	0.268545	0.082509	0.718718	0.564925	0.27746
VIT_15s0046g01610	Acidic endochitinase (CHIB1)	0.402643	0.529394	0.231798	1.62908	4.66642	2.42635	1.48047	1.16186	0.834614	0.543144	0.589861	0.359711	3.3656	2.71422	4.07998	1.32591	2.56856	0.852889	0.595661	0.523466	0.239243	4.9484	5.85221	2.9396	1.5315	1.48929	2.03887
VIT_04s0079g00230	Sucrose synthase	0.407974	0.341663	0.0538648	0.718562	0.831297	0.576893	0.0781438	0.0301115	0.0971229	0.137361	0.38728	0.0507188	0.705807	1.24583	0.915289	0.123333	0.0713142	0.0624035	0.390478	0.20595	0.0561911	1.17563	0.864059	1.01655	0.0524273	0.0594156	0.0705694
VIT_00s1380g00020	Pyruvate decarboxylase 1 [Vitis vinifera]	0.415835	0.418201	0.517044	0.375538	0.376724	0.505117	0.367335	0.268925	0.336461	0.549464	0.357916	0.312062	0.253243	0.10756	0.27378	0.506645	0.425911	0.439381	0.37021	0.473954	0.293187	0.129314	0.154631	0.321473	0.245699	0.246154	0.417641
VIT_18s0001g06080	UDP-glycosyltransferase 85A1	0.416269	0.10647	1.37538	1.94028	1.28148	1.61656	2.57515	2.51869	3.48335	0.0811931	0.335316	0.32337	1.18278	0.935845	0.914173	2.00218	1.86671	4.23056	0.490535	0.173239	1.07899	1.38374	1.00306	1.48481	6.64979	2.59672	3.90333
VIT_05s0094g01330	Inositol polyphosphate 5'-phosphatase	0.42374	0.601061	0.502633	0.738051	0.434357	0.885654	2.19235	1.01922	1.36244	0.433908	0.668392	0.480826	0.481186	0.62364	0.991195	1.63546	1.19771	1.41334	0.517425	0.588127	0.528832	0.535504	0.603131	0.763037	1.63835	0.924032	1.21011
VIT_11s0016g00220	Glycosyl hydrolase family 17 protein	0.432764	0.310866	0.0907478	0.668912	0.866323	0.586407	0.120467	0.0615085	0.129094	0.218084	0.27489	0.0229166	0.680589	1.17787	0.902705	0.075991	0.119079	0.159162	0.44462	0.292217	0.0154893	1.13117	1.08784	0.736947	0.106215	0.124376	0.225618
VIT_10s0003g02150	Trehalose-phosphate synthase 1	0.465357	0.298579	0.287602	0.194177	0.155099	0.264925	0.224134	0.052926	0.135885	0.502036	0.4782	0.552261	0.288355	0.267316	0.243857	0.19609	0.188097	0.173349	0.303464	0.220977	0.192659	0.228798	0.0871964	0.290647	0.302821	0.0658442	0.2051
VIT_08s0007g05100	Glycosyl hydrolase family 31 protein	0.479586	0.748759	0.789347	0.570656	0.775946	0.593404	0.535567	0.733054	0.99942	0.430851	0.558047	0.749498	0.474055	0.689512	0.65234	0.36108	0.806546	0.785609	0.600762	0.988713	0.783578	1.0624	0.455599	0.427196	0.696098	0.857326	1.02644
VIT_10s0003g02160	Trehalose-phosphatase	0.480554	0.464142	0.417723	0.211497	0.170847	0.523097	0.31577	0.143619	0.164329	0.575325	0.936779	0.484548	0.302928	0.162485	0.20078	0.317297	0.253356	0.221469	0.333154	0.215014	0.355174	0.398928	0.135857	0.379778	0.672583	0.0786361	0.300354
VIT_16s0013g01690	Glycosylasparaginase	0.483169	0.095975	0.390628	0.275287	0.66937	0.652748	0.493241	0.605187	0.253604	0.340408	0.579744	0.414283	0.0859673	0.636108	0.205248	0.530568	1.29318	0.861787	0.432064	0.093256	0.779221	0.669181	0.12548	0.433165	0.650132	0.413476	0.734435
VIT_08s0058g01460	1,4-beta-mannan endohydrolase	0.505852	1.05203	0.560296	3.58502	3.21158	2.66985	1.73651	2.79746	1.81117	0.940307	0.976133	0.346441	3.24044	3.04743	3.00988	2.36349	2.52855	1.72782	1.23306	0.852199	0.650833	2.4569	3.78341	3.17261	2.5062	2.24986	1.75042
VIT_11s0052g00150	Mannosyl-oligosaccharide 1,2-alpha-mannosidase	0.515334	0.797352	0.776174	0.527663	0.127413	0.560428	3.55069	1.35694	2.27099	0.674251	0.454143	0.637418	0.286213	0.311233	0.553126	0.499353	0.357444	0.770676	0.73515	0.515849	1.20947	0.371151	0.470558	0.91979	2.99421	1.68351	1.69614
VIT_08s0007g06030	Beta 1-3 glucanase [Vitis vinifera]	0.54123	1.50918	0.744737	2.93554	4.03781	1.76596	1.34307	1.14608	1.07304	0.741074	1.75089	0.91211	2.09486	3.7369	2.09965	0.952463	1.39296	1.44966	1.23113	1.5511	0.820863	1.32562	3.67002	1.58483	0.634048	1.17754	1.5384
VIT_06s0061g00120	Beta-1,3-glucanase [Vitis riparia]	0.573345	1.37748	0.460739	0.327102	0.885476	0.036381	0.153525	0.180321	1.1282	0.905277	1.51764	0.37876	0.327749	0.945856	0.413209	0.387479	0.395908	2.0881	0.972203	1.70645	1.22885	0.316972	0.715678	0.0197068	0.14594	0.840395	1.54664
VIT_03s0088g00210	STT3B (staurosporin and temperature sensitive 3-like B)	0.573831	0.412371	0.781832	0.472557	0.448433	0.32355	0.232725	0.564182	0.233858	0.46225	0.533276	0.579691	0.292868	0.357388	0.501025	0.413435	0.321491	0.421801	0.548199	0.681304	0.641322	0.345242	0.422459	0.503169	0.464894	0.458947	0.413019
VIT_14s0060g00770	Glycosyl transferase family 8 protein	0.577565	0.175855	0.596132	1.27152	2.36469	1.9185	2.31033	1.23393	1.00955	0.270807	0.250609	0.204678	1.48787	1.90066	0.829989	1.72804	1.01324	0.860554	0.672486	0.600993	0.49621	2.68291	2.63003	1.98494	2.17492	0.524307	0.826107
VIT_06s0004g03340	Ribose-5-phosphate isomerase	0.584905	0.648053	0.698859	1.37307	0.589969	1.28117	7.15318	1.88118	1.94529	0.67166	0.211575	0.304685	1.07912	0.81141	1.40572	5.77805	1.85729	2.35387	0.775201	0.476051	0.48382	0.670916	0.568289	1.4281	5.43408	1.8109	1.71192
VIT_15s0021g00470	Beta-phosphoglucomutase	0.603302	0.374565	0.419038	1.63555	1.74118	2.01133	1.24823	1.37624	2.16064	0.509192	0.389613	0.483768	1.53792	1.40445	2.04587	0.988037	1.60102	2.59908	0.573342	0.316342	0.558144	1.80288	1.65701	1.81231	1.4435	1.1028	2.66765
VIT_14s0083g00470	2,3-biphosphoglycerate-independent phosphoglycerate mutase	0.607038	0.822528	0.727206	1.31627	0.626962	0.414455	1.21981	1.26107	0.522691	1.37524	0.517279	0.713904	0.61033	0.106192	0.827772	1.52892	0.823417	1.22654	1.18061	1.02238	1.06324	0.730758	1.06756	0.799536	1.07629	0.79392	0.556977
VIT_12s0057g00700	Glucan endo-1,3-beta-glucosidase 3 precursor	0.639164	0.209813	1.37634	33.6263	44.3852	38.0832	4.98479	5.28517	4.73954	0.245281	0.172527	0.71726	38.3665	26.5963	48.5887	4.42901	5.97374	5.13035	0.411519	0.593684	1.07522	28.7983	45.9054	42.9913	3.67278	2.71871	10.1635
VIT_14s0108g00190	Aldose 1-epimerase	0.642753	0.740953	0.883783	0.392448	0.323357	0.639396	0.124881	0.197583	0.508491	0.836105	0.76615	0.589335	0.583274	0.941469	0.706186	0.392602	0.381635	0.591645	0.840077	0.672042	0.853453	0.736693	0.773524	0.828992	0.248599	0.477036	0.671971
VIT_14s0083g00480	2,3-biphosphoglycerate-independent phosphoglycerate mutase	0.646722	0.776396	0.480003	0.28365	0.41902	0.224945	0.528235	0.374978	0.471586	0.580037	0.465652	0.596751	0.62108	0.778271	0.366526	0.465467	0.498954	0.367297	0.172648	0.63279	0.347362	0.388917	0.260648	0.363682	0.52868	0.465092	0.34992
VIT_06s0004g02060	Aldehyde dehydrogenase 3B1	0.652035	1.18842	1.25601	0.928884	1.47313	2.59044	0.573561	0.420298	0.50783	0.354241	0.825419	0.934829	0.664715	1.10783	2.47186	1.46847	0.821079	0.869782	0.767969	1.06268	1.42013	0.515843	1.28095	2.37147	0.449812	0.454935	0.802004
VIT_01s0011g01910	Glycosyl transferase-related	0.662852	0.396692	0.410994	0.698392	0.515624	0.687692	1.28082	0.840302	1.19281	0.639228	0.44156	0.534295	0.546549	0.616978	0.820174	1.25948	0.867464	1.50772	0.651106	0.556782	0.466127	0.67807	0.408152	0.580769	1.06138	0.67216	1.00608
VIT_15s0046g01450	Alpha-L-fucosidase	0.684419	0.65685	0.630045	1.52261	1.20498	3.03094	0.103162	0.0778728	0.110077	1.25514	0.531608	1.35287	2.28478	2.03872	1.73048	0.0894144	0.191232	0.179231	1.171	0.698413	1.0341	2.67487	2.34723	3.70491	0.0529534	0.129152	0.044323
VIT_09s0002g07630	Beta-galactosidase	0.688966	1.73102	0.366071	0.64107	0.25233	0.695064	0.486677	0.49968	1.12153	0.629184	0.455208	0.902511	1.3792	2.05644	0.188158	0.465587	0.4924	1.69097	0.4902	1.37817	0.518774	2.02358	0.387734	1.44346	0.77236	0.442695	0.36168
VIT_14s0128g00060	Alpha-L-fucosidase 2 precursor	0.731362	0.388547	0.698592	0.725472	2.43871	1.51891	3.07348	1.63539	2.43703	0.794459	0.454993	0.922161	0.943427	1.33005	1.32608	2.57376	1.37363	2.72104	0.444077	0.339986	0.627806	1.72451	0.87722	1.73427	3.39668	1.72045	1.82913
VIT_09s0054g00230	Mannosyl-oligosaccharide 1,2-alpha-mannosidase IA	0.737644	1.02294	0.943422	1.13016	0.879774	1.32726	1.6831	1.11607	1.25149	1.10586	0.945503	0.564249	0.962557	1.06841	1.20324	1.98002	1.67482	1.67767	0.739044	0.629886	0.686984	1.17172	0.939628	1.46167	1.69085	1.43933	1.02082
VIT_12s0059g02670	Beta-amylase	0.746898	0.763013	0.531565	0.372696	0.408744	0.479481	0.897667	0.534417	1.07448	0.904755	1.0061	0.669544	0.556982	0.487635	0.514515	0.896929	0.709065	1.28584	0.565267	0.686083	0.519233	0.326467	0.30204	0.444124	0.830271	0.789724	1.08034
VIT_10s0116g01710	Galactosyltransferase family protein	0.767987	0.555465	0.848678	0.170366	0.241087	0.500686	0.426177	0.386338	0.760311	1.46802	1.09316	0.44642	0.254032	0.218256	0.446304	0.36093	0.200856	0.963307	0.681216	0.620703	0.567518	0.105595	0.135389	0.422524	0.434158	0.375244	0.550997
VIT_07s0005g01680	Stachyose synthase	0.77346	0.78411	1.06099	62.6823	57.4387	45.5858	225.43	98.3789	83.471	0.517412	0.52058	0.765301	45.7289	39.8386	49.9119	177.949	80.7564	57.3548	0.30789	0.487471	0.900358	66.2815	54.4145	42.9191	203.975	85.2788	68.9238
VIT_13s0019g03120	Glucosyltransferase-2	0.788937	1.02579	0.795943	0.612318	0.597873	0.727964	1.58383	2.89005	2.93894	0.696602	1.51117	0.955212	1.0828	1.77124	1.06142	1.76724	2.60198	3.67773	0.753444	1.32423	0.822762	1.09297	1.53239	0.934832	2.37056	2.8878	3.18272
VIT_09s0002g06430	Lactoylglutathione lyase	0.794533	0.68373	0.506664	14.7926	14.3944	8.42888	2.30091	20.5967	38.4612	3.46467	3.41414	0.496621	14.4678	12.2311	6.70276	2.48914	10.1107	27.9167	0.653687	0.32559	0.369301	18.3789	19.1558	9.27873	5.67364	17.882	33.5769
VIT_18s0075g00340	Sucrose-phosphate synthase - like protein	0.812512	0.695503	1.94405	11.5859	9.91958	8.15673	15.929	15.5014	13.893	0.516278	0.525006	1.28417	7.19709	7.69553	8.68863	13.4228	12.1755	11.4409	0.359785	0.736516	1.61216	8.83429	6.57668	8.87905	13.6987	10.3113	14.4811
VIT_18s0001g05990	UDP-glycosyltransferase 85A1	0.82523	0.547947	0.814571	52.7319	49.7235	51.8922	12.5554	17.4622	15.2524	0.589732	0.669252	0.848999	51.8904	45.1756	44.3585	13.9426	10.9863	15.9811	1.08346	0.673327	1.20613	54.1314	44.9454	56.7065	15.6819	7.60783	19.9034
VIT_18s0122g01400	Exostosin family protein	0.831505	0.544407	1.4363	3.40184	3.62806	1.58381	3.15367	3.11613	5.38005	0.626261	0.783535	0.745071	2.6677	2.83337	2.27234	4.19177	5.13119	6.81144	0.903708	1.11644	1.08744	1.73504	3.46711	1.50142	3.65624	4.89054	5.90714
VIT_07s0104g01010	Aldo/keto reductase	0.843185	1.15434	0.880847	0.773427	0.634862	1.46451	2.20643	1.97119	2.3163	1.444	0.943709	1.64289	1.02951	1.12288	1.25856	2.51443	2.78199	2.06171	1.06799	1.08023	0.917251	0.582968	1.37814	1.34786	2.27785	2.11996	2.26173
VIT_18s0075g00350	Sucrose-phosphate synthase isoform C	0.867541	1.36476	3.97638	29.3903	24.9705	17.426	34.4731	40.179	37.6961	1.02947	0.732302	2.88445	19.1863	26.9818	20.2088	31.8606	29.7664	45.2511	0.816834	0.936648	1.93563	26.6653	15.1869	16.6512	36.5282	23.6325	33.0212
VIT_05s0094g00990	UDP-glucose:salicylic acid glucosyltransferase	0.911129	0.70157	0.618093	0.123035	0.113005	0.027743	0.29968	0.291999	0.380497	0.914755	0.272627	0.437118	0.208372	0.0445701	0.184932	0.338	0.515697	0.449313	0.563069	0.340778	0.781813	0.111758	0.0409841	0.0529626	0.277857	0.522382	0.407258
VIT_11s0052g00140	Mannosyl-oligosaccharide 1,2-alpha-mannosidase	0.950593	1.24284	1.4095	0.922387	0.729943	0.791315	1.83615	1.1513	1.2598	1.3994	1.25689	0.925123	0.512047	0.492181	0.516178	0.575867	0.595174	0.550983	1.15462	0.846626	1.35887	0.849603	0.652764	0.78232	2.15674	1.2187	0.919556
VIT_05s0094g00260	Chitinase, class IV [Vitis vinifera]	0.984685	2.42968	1.05451	0.18611	3.46965	0.19786	0.10447	0.265663	0.0980653	0.614579	2.3892	0.760826	0.120386	4.35184	0.0796605	0.425049	0.624541	0.260115	1.77711	2.09615	0.946551	0.190386	3.52034	0.118273	0.106032	0.957599	0.280211
VIT_18s0001g05160	Glycosyl hydrolase family 3 protein	0.987496	0.91272	1.55386	0.538384	0.442745	0.786117	0.79691	0.351519	0.43232	1.0621	1.34879	1.03797	0.545058	0.814828	0.899626	0.735815	0.610924	0.635841	1.12157	0.66472	1.28109	0.465583	0.547813	0.831269	0.660787	0.519688	0.366935
VIT_07s0151g00590	Inositol-1,4,5-trisphosphate 5-phosphatase CVP2, type I	0.99313	0.989755	1.21684	0.069899	0.109004	0.231327	0.16442	0.194195	0.265605	1.47604	1.06867	1.08841	0.170299	0.149383	0.208568	0.148926	0.171914	0.19099	0.994318	0.897936	0.740287	0.198663	0.131705	0.189706	0.119446	0.217631	0.335669
VIT_08s0007g04600	UGT73C2 (UDP-glucosyl transferase 73C2)	0.999791	1.3068	0.564209	0.0488653	0.0533194	0.0343032	0.0401637	0.154632	0.175606	1.22335	1.65128	0.884939	0.055525	0.0887124	0.0163476	0.0385423	0.085062	0.223693	0.79162	1.20325	0.694741	0.0386956	0.0139614	0.0618014	0.0317238	0.185743	0.18562
VIT_01s0150g00630	Exostosin-like	1.02659	1.03108	0.81666	0.509214	0.655044	0.437795	0.395763	0.402513	0.465902	2.02201	1.84582	1.13639	0.484	0.460859	0.887408	0.489968	0.422859	0.779691	1.53804	0.919888	0.885181	0.58563	0.42073	0.673085	0.316217	0.145356	0.526597
VIT_08s0040g00680	Phosphatidylinositol 4-kinase type-II	1.03393	0.900258	1.35995	5.31378	4.86298	5.0219	6.06875	5.14678	4.89024	1.12795	0.646262	0.671188	5.89968	5.63223	4.36709	6.24309	5.97425	4.95805	0.93714	0.811501	1.16621	5.99366	4.54393	5.06546	6.20596	4.83852	4.75452
VIT_14s0068g00490	UDP-glucuronosyl/UDP-glucosyltransferase	1.03545	0.922749	1.02867	0.631989	0.833751	1.53531	0.147129	0.303597	0.371057	0.736696	0.500194	0.650501	0.292265	0.73373	0.518976	0.38416	0.562083	0.0599927	0.811809	1.01358	0.947725	0.522019	0.5165	0.780952	0.967386	0.414607	0.403966
VIT_14s0083g00490	Phosphoglycerate mutase	1.05259	0.825563	1.18362	0.85257	1.17653	1.71288	0.987298	1.36289	1.35807	1.68952	0.66097	1.78772	1.66039	1.36837	1.06908	0.922759	1.31335	0.778248	1.87177	1.19622	1.42643	1.44781	1.48649	1.75935	1.56762	1.59119	1.41837
VIT_13s0067g00890	Phosphoinositide-specific phospholipase C	1.09558	1.38244	0.66639	1.89388	2.24876	0.370007	6.42553	14.0585	12.5299	0.88962	1.10734	0.571652	1.67445	2.63941	0.784268	5.76175	14.7001	12.5372	1.79582	1.22065	0.863291	3.93481	2.05916	0.519071	8.98131	23.834	7.61494
VIT_15s0046g03620	2-oxo acid dehydrogenase, lipoyl-binding site	1.10235	1.70184	0.673072	0.802707	1.12999	0.760775	1.08144	1.03447	1.07305	1.27783	1.84345	1.00506	0.90443	0.802466	1.07057	0.934577	1.21973	0.978917	1.03799	1.69417	0.827166	0.699036	0.757338	0.564366	0.936748	1.12998	1.01584
VIT_00s0406g00010	Beta-hexosaminidase beta chain precursor	1.13066	0.409624	1.18497	1.26405	1.05695	0.778121	0.588131	0.130201	0.541721	1.05914	0.463168	0.23624	0.654844	1.38235	0.953827	0.495064	0.549376	0.0976923	0.955891	0.373108	1.0749	0.84082	0.352831	1.40696	0.494733	0.230704	0.122458
VIT_06s0080g00240	DTDP-glucose 4-6-dehydratase	1.20172	0.951967	0.758753	0.687246	0.698504	0.967609	1.59344	1.20857	1.43574	0.955452	0.941698	0.712395	0.766622	0.774956	1.11538	1.44754	1.75472	1.55686	1.139	0.901722	0.91327	0.554103	0.828876	0.915305	1.43644	1.26803	1.43109
VIT_15s0048g01260	fructokinase 1	1.22335	1.15913	1.91794	2.19772	1.92496	3.13134	1.14337	0.870661	0.953358	1.20249	0.70689	1.47354	2.35307	1.69606	2.25947	1.2447	1.02592	0.743605	1.26965	1.10794	1.78068	2.09653	2.08374	2.92827	0.783865	0.608242	1.4145
VIT_05s0029g01140	Sucrose-phosphate synthase	1.24794	1.34229	3.8962	35.9437	31.5307	39.8616	51.794	50.2593	43.1295	2.2466	2.0302	2.68406	33.4517	33.9278	35.7472	57.5726	50.105	44.3234	0.520574	1.12015	2.64934	30.115	30.4657	35.2092	36.0013	40.3224	34.6463
VIT_08s0007g05430	Pyruvate kinase	1.25693	1.99489	1.88356	2.28324	3.08723	2.23187	1.9509	1.72997	2.47491	1.97287	1.7808	2.02426	2.92915	2.61314	2.09892	1.92913	2.59935	1.80145	2.55304	1.76132	2.20548	1.21526	3.32688	1.81593	1.7645	2.54156	1.55039
VIT_08s0007g04610	UGT73C2 (UDP-glucosyl transferase 73C2)	1.25936	2.36891	1.1765	0.19773	0.104033	0.183771	0.206625	0.0846255	0.213433	2.07759	2.6078	1.70127	0.103412	0.141823	0.210133	0.132613	0.122462	0.330402	1.45017	2.34305	1.10202	0.201291	0.054684	0.208775	0.218035	0.134849	0.198315
VIT_00s0227g00180	Acyl-coenzyme A thioesterase 9.	1.28227	0.783316	1.17963	0.996661	0.611283	0.956044	0.666596	0.465131	1.0729	0.965692	0.77274	0.956772	1.03457	0.523012	1.18817	0.532415	0.481948	0.919133	0.825412	0.88879	1.26614	0.437398	0.537904	1.01513	0.293114	0.316681	0.801276
VIT_00s1251g00010	UDP-glucosyl transferase 85A2	1.28268	1.08864	1.66531	4.22952	2.18617	6.15024	0.129588	0.259618	0.268225	1.32186	0.740817	1.88692	4.23252	3.24897	4.44316	0.247805	0.320254	0.549247	1.25391	0.756235	1.89445	3.21146	2.60616	5.7615	0.143544	0.273154	0.398401
VIT_00s0301g00190	Beta-galactosidase	1.28657	0.616488	1.31663	0.265297	0.507304	0.313586	0.730606	0.511835	0.558961	1.1517	0.764519	0.967275	0.416432	0.336706	0.415774	0.828807	0.663396	0.175029	1.01761	0.651227	1.03592	0.434567	0.478209	0.319747	0.801695	0.664704	0.575216
VIT_19s0138g00110	1,3-beta-glucan synthase	1.29772	0.893821	1.81423	6.47276	8.88344	8.76395	4.55729	4.53489	3.97655	1.2376	1.69452	1.34794	5.5723	8.30518	7.14671	3.22363	3.7675	2.80737	0.977179	0.903254	1.15979	7.10073	8.23807	9.60723	5.95277	3.77672	4.70371
VIT_09s0002g06880	Beta-1,3-glucanase	1.29879	1.00797	0.423264	0.988508	1.16481	1.03094	0.469761	0.210659	0.410915	1.21456	1.22761	0.366283	1.55474	1.8075	1.74596	0.506339	0.475398	0.983161	1.01382	1.16112	0.400941	1.8197	1.21074	1.4028	0.5212	0.361239	0.830721
VIT_02s0241g00180	UDP-D- glcucuronate 4-epimerase 5 GAE5	1.30816	0.838734	2.07633	3.62759	2.72786	3.50207	4.41312	3.3301	3.0569	1.96134	1.045	1.49756	4.06764	2.9314	6.08105	5.3604	4.59411	2.43859	1.45924	0.762858	1.85439	2.85693	3.69739	3.86429	4.81538	3.64328	3.95642
VIT_12s0055g00310	UDP-glucose glucosyltransferase	1.36248	1.60659	1.84854	3.40627	3.39525	4.57753	0.339576	0.893814	1.47895	2.05433	1.01824	2.35812	3.80838	4.66242	14.5785	0.589497	1.92572	2.3943	1.25788	0.959307	2.3719	2.36332	3.82316	5.30232	0.214448	1.12717	1.7973
VIT_06s0004g06650	1-phosphatidylinositol-4,5-bisphosphate phosphodiesterase	1.40803	1.18195	3.44909	1.49225	1.66505	1.22961	1.82726	2.43306	2.18726	1.03197	0.7597	1.68929	1.4066	1.7483	1.03099	1.55291	1.66347	1.87118	1.79949	1.15284	3.31857	1.59444	1.66763	1.13074	1.73461	2.10533	1.80035
VIT_12s0028g00400	1,3-beta-glucan synthase	1.41368	1.1624	1.91076	1.46044	1.10277	3.07873	1.29909	1.20606	1.24829	1.24868	1.03698	1.38942	1.68866	1.83768	2.19091	1.5312	0.98858	1.00246	1.25871	0.966644	1.61204	1.69294	1.51759	3.22779	1.71048	1.04069	1.06739
VIT_14s0060g00760	Galactinol synthase	1.44233	0.98569	1.03026	9.44717	8.9277	7.77396	1.97796	1.71232	1.42222	0.807382	2.07885	1.05682	6.77575	9.37968	3.59138	1.55152	1.07926	0.983359	1.48724	4.04449	0.880935	17.1536	9.90772	8.913	2.08514	0.928639	1.0615
VIT_05s0062g01010	Aldo/keto reductase AKR	1.44718	3.00696	0.817752	0.671999	1.08342	0.350445	0.712616	1.05336	1.07942	2.60105	4.38673	1.53138	0.398026	0.639807	0.420078	1.05137	1.70798	1.21538	1.43249	4.77105	0.391083	0.42421	1.04114	0.0654373	0.783168	1.91094	1.53335
VIT_12s0034g00060	UDP-glucose glucosyltransferase	1.45821	1.99957	1.1876	0.247347	0.635865	0.266993	0.64834	0.452311	0.66523	1.61179	1.48482	1.34934	0.717236	0.396938	0.185492	0.515216	0.682739	0.413851	1.45026	1.61029	1.26227	0.476578	0.635863	0.356585	0.761543	0.689386	0.702575
VIT_07s0005g02800	ADP-glucose pyrophosphorylase large subunit 2	1.46709	1.35193	2.28909	1.2244	0.852966	1.65328	4.2717	2.40146	2.65169	1.29891	1.6338	3.23973	0.905492	1.08028	2.48791	4.08101	2.58785	3.51789	1.55368	1.17927	2.67455	1.21637	0.898108	1.21054	3.29344	3.43458	3.03784
VIT_12s0034g01120	UDP-glycosyltransferase 71A13	1.48545	2.16314	0.670105	0.31473	0.832439	0.169332	0.352226	0.330838	0.772943	1.2152	2.16598	1.04776	0.468869	0.91501	0.156733	0.459922	0.357746	1.09214	1.43425	1.61826	0.846369	0.803713	0.43227	0.0320931	0.438272	0.347988	0.70424
VIT_00s0582g00010	Phosphoglucomutase/phosphomannomutase C terminal	1.49873	1.31824	1.84262	1.31849	1.3404	1.42138	1.33549	1.10073	0.915068	1.58149	1.4462	1.34645	1.06518	1.66681	1.59773	1.5994	1.0409	1.71817	1.80875	1.67383	2.13814	0.979948	0.727177	1.44552	0.733587	1.22074	1.55514
VIT_11s0065g00240	Galactokinase like protein	1.51121	2.19117	1.75517	1.36925	0.924184	1.41293	0.588821	0.926597	1.08874	1.8245	1.65637	1.28561	0.802328	0.7587	1.20469	0.384138	0.677412	0.318055	1.47428	1.55514	1.43117	1.29004	1.89239	1.03832	0.534812	0.58763	1.12313
VIT_00s2240g00010	GAE3 (UDP-D- glcucuronate 4-epimerase 3)	1.51177	1.30748	2.08273	6.15054	6.63315	5.92003	6.08506	4.80805	4.98023	2.40083	1.98101	1.84285	6.17696	6.66913	8.36826	6.2479	5.52803	7.27716	1.76288	1.26541	2.2074	6.00709	5.71591	4.64339	5.76015	5.09216	3.82073
VIT_15s0046g01570	Acidic endochitinase (CHIB1)	1.53332	2.20249	1.99984	4.60963	3.82172	2.38721	1.58228	2.99992	7.94691	6.86622	2.5504	3.05911	3.17353	3.23203	7.32565	2.55301	5.65705	12.6821	3.73074	2.65397	3.10245	2.08608	4.95085	2.19645	1.74079	8.52481	8.56317
VIT_05s0094g00200	Chitinase class IV	1.61031	3.11648	0.298932	4.69365	10.8399	2.90294	1.08293	2.51927	3.46829	1.95096	4.01123	1.75899	4.42886	10.5583	6.25899	1.2457	2.74086	4.12047	4.24574	2.92514	0.520451	5.41313	9.49216	5.23997	0.978681	3.57178	4.75706
VIT_00s0218g00200	UDP-glucuronosyl/UDP-glucosyltransferase	1.61879	1.77609	1.86801	2.57744	5.19102	1.93477	1.81678	2.16068	2.40399	1.33628	2.6984	1.86585	3.58824	1.34401	3.40974	2.22766	4.53784	1.60997	2.11928	1.69401	1.90773	2.07157	5.38955	0.962443	2.00229	3.37523	5.12587
VIT_14s0081g00030	Pathogenesis-related protein-4 (Chitinase )	1.65274	3.90721	3.38372	2827.04	6906.14	3474.91	813.737	1742.71	1072.45	1.97429	3.87317	1.97891	4095.04	5304.05	2776.08	988.818	1761.86	1521.74	5.99052	8.40416	8.0201	5937.4	7257.13	4323.3	1336.68	960.285	1775.88
VIT_08s0007g05990	Beta 1-3 glucanase	1.65846	1.53611	0.547134	3.25809	2.04053	2.42374	0.0868328	0.37133	0.225033	1.29916	1.43128	0.474887	2.96137	3.17339	1.47931	0.203422	0.335562	0.31523	3.14314	1.51061	0.457807	4.31371	3.09501	4.15085	0.201508	0.355163	0.335163
VIT_02s0087g00030	Alpha-glucosidase	1.68827	1.92156	1.55426	0.507825	0.479617	0.68928	0.0452221	0.144039	0.304908	1.86835	2.0263	1.74604	0.364873	0.453976	0.313958	0.106159	0.196377	0.233804	1.37597	1.59883	1.54476	0.575784	0.24261	0.635924	0.112297	0.117838	0.284733
VIT_08s0007g05240	Phosphatidylinositol-4-phosphate 5-kinase	1.75927	1.63205	2.73349	0.286806	0.412086	0.490964	0.0229983	0.0482557	0.0518114	2.20768	1.62448	4.13859	0.423816	0.40292	0.365792	0.0653008	0.092375	0.101394	1.81222	1.07605	3.33069	0.537903	0.471409	0.525033	0.0697146	0.12625	0.137278
VIT_11s0065g00290	Galactokinase like protein	1.77262	1.71394	1.54176	1.46572	1.27782	1.90263	1.42297	1.06554	1.80757	1.54367	1.93282	1.37669	1.23824	1.48623	1.81841	1.28256	1.13014	1.95112	1.54589	1.55374	1.51078	1.72306	1.48133	1.68496	1.35273	1.45345	1.71235
VIT_11s0065g00300	Galactokinase like protein	1.77623	1.95593	1.62544	1.77669	1.46006	1.54875	0.710694	0.783585	1.29243	2.4872	2.80822	1.14102	1.55238	1.71871	1.85708	0.712674	0.770798	0.802725	1.90097	1.29601	1.55256	2.13639	1.38549	2.30206	0.616367	0.696468	1.18952
VIT_12s0055g00250	UDP-glucose glucosyltransferase	1.78074	1.94971	2.22998	0.225798	0.219743	0.478321	0.079174	0.092429	0.128477	2.07481	1.46148	1.41614	0.299897	0.463266	0.497046	0.13318	0.127296	0.156725	1.30144	1.9842	1.68674	0.165678	0.409756	0.481718	0.0534003	0.120183	0.33977
VIT_17s0000g07680	Alpha-N-acetylglucosaminidase	1.78726	1.5356	2.20975	1.47953	1.3943	1.71259	2.4586	1.90747	1.84299	1.86389	1.37614	1.79162	1.6359	1.25518	1.50623	2.82321	2.06913	2.20566	2.14514	1.32979	2.08044	2.02507	1.4386	1.72169	2.15669	1.875	1.79391
VIT_00s1356g00020	Phosphosulfolactate synthase protein	1.83187	0.875803	0.922005	0.44872	0.180645	0.715289	0.177646	0.517951	0.464534	1.20995	1.33275	0.899841	0.765656	0.271506	0.942396	0.382697	0.0939523	0.261269	1.27568	1.23678	0.920492	0.488626	0.358478	0.11546	0.210474	0.279521	0.301949
VIT_13s0019g03130	Glucosyltransferase-2	1.83475	2.60248	1.53934	1.58501	3.16967	1.97001	3.54551	5.73993	5.69489	1.88965	3.01213	2.00011	2.3579	3.88368	2.11962	3.70598	6.12091	8.59696	1.46638	4.08692	1.97995	2.38377	2.76052	1.61208	3.99034	6.52377	7.04277
VIT_18s0001g12840	ADP-glucose pyrophosphorylase large subunit CagpL2	1.863	1.77794	1.79723	23.525	25.339	12.1188	4.0824	8.68945	12.8683	3.23438	2.37609	3.26731	32.3568	30.7579	17.1388	6.3436	11.3295	14.1962	2.57502	2.09992	2.519	29.1029	28.4973	12.0686	5.56507	10.1494	13.1564
VIT_11s0016g05630	Acetylglucosaminyltransferase	1.89676	1.73781	1.73262	5.24757	4.41282	3.31963	4.34184	3.51702	3.7836	2.1539	1.22828	1.83865	4.58459	3.87035	3.66047	4.42745	3.77546	4.79755	1.91286	1.17003	1.68175	4.03687	4.34119	3.10851	3.76952	3.24751	3.41426
VIT_15s0046g01590	Acidic chitinase III	1.97252	1.90783	2.1393	4.98184	8.73002	6.38165	3.94737	3.90233	4.41294	2.42286	2.45195	2.37074	6.81484	7.69239	9.57129	4.76032	5.3692	4.08265	2.37012	2.15587	2.16098	11.1486	12.7016	7.87098	5.21689	5.11633	6.40989
VIT_02s0012g02460	NADP-malic enzyme	2.01611	1.75526	0.902105	0.633475	0.843209	0.733484	1.00382	1.05077	0.996683	2.16732	1.60805	1.49401	0.674328	0.923625	0.647144	1.27608	1.2417	0.88138	1.9843	1.90101	0.943809	0.779127	0.727889	0.835513	1.04932	1.10342	1.09454
VIT_14s0030g00920	Alcohol dehydrogenase	2.01709	3.11674	1.97106	1.04121	1.25059	1.58825	2.4473	2.08952	1.53604	3.40348	2.75032	2.57151	1.32299	1.73695	1.68502	1.82335	2.42947	1.04784	1.63328	2.68958	2.19607	1.7738	1.5828	1.87977	2.13852	1.59178	1.57058
VIT_02s0025g01560	UDP-glucose 4-epimerase GEPI48	2.06524	1.35104	2.31947	6.15239	7.60513	6.90137	14.4241	13.2925	14.4902	4.10165	6.8043	3.2988	7.12409	11.3417	7.78304	17.1174	17.2231	18.253	2.95127	1.97096	2.98986	7.96002	10.3447	7.92382	19.4223	21.0322	14.6373
VIT_07s0005g01040	Glycosyl transferase family 8 protein	2.06637	0.920044	2.09706	1.48694	2.58277	0.966525	3.99245	3.89057	4.89469	2.3814	2.19002	2.9952	1.89194	1.85423	3.39004	4.80594	4.80788	3.57543	2.74913	1.30458	2.62487	1.45794	2.21765	1.51993	5.20626	7.09708	4.38037
VIT_03s0017g01990	UDP-glucose glucosyltransferase	2.16734	5.8566	2.52227	0.493759	1.81222	0.327799	0.39894	0.413637	0.218543	0.783365	4.02448	1.16646	0.251131	1.38626	0.152892	0.268228	0.580503	0.227343	4.02151	2.65333	0.934334	0.289406	1.10758	0.104436	0.205065	0.527491	0.0729118
VIT_11s0149g00300	Chitinase, class V	2.16807	2.9913	4.16676	4.64521	4.48892	3.79494	2.30786	4.41486	4.34806	2.50116	3.64554	3.44273	5.32322	5.87583	4.2497	3.25504	4.51824	6.14542	2.23975	2.84877	3.62876	5.3278	5.62116	3.90006	2.81647	3.48679	4.34143
VIT_02s0025g01030	Aldose 1-epimerase	2.20511	1.72021	1.99564	1.59631	1.15836	3.24933	2.64313	2.61116	1.96402	2.46692	1.47297	1.33303	2.01873	2.40559	3.38644	3.32763	2.12798	2.75649	1.66525	1.51614	1.74343	1.73079	2.13398	3.17906	2.5267	2.28254	2.83939
VIT_00s0540g00020	Chitinase, class V	2.21051	4.2324	3.28992	2.12877	2.63332	1.91153	1.15471	1.52083	1.30376	2.57426	4.38502	3.13643	2.36443	2.64335	1.69094	1.4706	1.77871	1.60363	2.37414	4.11023	3.53653	2.82309	2.91639	1.88253	1.45561	1.98204	1.40017
VIT_18s0001g06060	UDP-glycosyltransferase 85A1	2.27522	1.21974	1.72055	359.293	345.857	331.577	95.0688	116.717	121.055	0.853328	1.41206	2.32709	336.172	307.422	377.481	97.3484	82.7016	113.76	4.22692	1.36853	1.73934	405.017	298.627	355.87	118.865	61.3745	145.165
VIT_08s0040g02350	Xylan synthase	2.40085	2.8254	2.18178	0.582948	0.472853	0.948786	0.533198	0.582889	1.26371	4.22296	4.93881	1.92196	0.309917	0.467569	0.818531	0.465162	0.443356	0.766372	2.19672	2.51018	2.16346	0.537493	0.431525	0.512719	0.669569	0.649658	1.20413
VIT_06s0004g00130	Pyruvate kinase	2.43278	1.64	1.80064	0.511914	1.09831	0.825464	4.89531	6.57318	5.30396	0.570093	1.27145	0.825114	0.615615	1.09968	1.24557	7.30866	7.28741	12.7885	4.43427	0.976507	1.63216	0.642245	1.05146	0.9397	6.41886	8.68528	9.50844
VIT_10s0092g00240	Alpha-glucosidase 1 (AGLU1)	2.44383	2.78214	3.07735	0.621525	0.499267	0.579906	0.0559682	0.123425	0.166715	2.96106	2.6113	3.31502	0.773142	0.672099	0.724836	0.0723975	0.171967	0.302444	3.46666	2.81822	3.76594	0.791812	0.406608	0.611624	0.0713199	0.129882	0.277503
VIT_01s0011g05500	Beta-1,3-glucanase	2.46872	3.0739	6.48414	11.3664	10.4555	19.0224	15.0806	13.4105	12.5492	3.22412	3.06059	4.09396	12.0259	12.7337	21.2239	15.4965	14.9339	14.9262	2.79736	3.72031	4.99997	9.63026	12.7318	16.602	15.4388	14.4	14.245
VIT_12s0055g00020	UDP-glucose glucosyltransferase	2.48073	2.56874	3.82382	1.57426	2.79011	1.87887	1.13598	3.54123	2.54401	1.61583	3.89215	2.77415	1.31488	2.96148	2.00787	1.37493	3.49604	3.77423	2.57624	2.46579	2.76873	1.24334	2.44498	1.02808	1.25981	4.76408	4.30733
VIT_05s0020g01310	SRG1 (senescence-related gene 1)	2.5108	2.22917	4.93831	2.599	4.2656	2.75358	1.07558	1.20096	1.80063	4.57472	4.61344	7.64662	2.3612	2.6961	2.2204	1.50711	1.77929	1.93252	1.71979	4.76755	3.57981	3.72794	3.53636	2.4145	1.52204	1.72691	1.33893
VIT_02s0025g00180	Bisphosphoglycerate mutase	2.53547	2.61435	8.13817	1.25999	0.717273	1.81059	0.0923045	0.118093	0.28357	1.95293	1.76894	3.77169	1.50405	1.07123	1.22362	0.121253	0.173901	0.235293	2.70641	1.58557	9.48838	1.04944	1.74553	1.74846	0.154826	0.24502	0.0940276
VIT_03s0038g00680	Exostosin	2.54624	2.70093	3.66115	7.68746	5.23946	7.7959	10.0421	9.61733	11.0498	2.75208	2.92319	3.6988	6.43483	7.38611	7.43375	9.81613	9.29873	12.1618	2.4607	2.39657	3.75421	7.89428	5.99119	7.98849	10.891	11.7444	8.03032
VIT_00s0199g00240	Pyrophosphate-fructose-6-phosphate 1-phosphotransferase	2.65426	3.56107	3.4472	1.19941	1.35662	1.07884	2.22104	2.12688	2.34583	3.15047	3.11746	3.35332	1.1148	1.19604	1.0527	2.0413	2.15826	2.4911	3.00909	3.37855	3.80677	1.1779	1.40403	1.36133	1.69256	2.44443	2.18242
VIT_00s1488g00020	Glycogen (starch) synthase	2.65898	2.48589	3.9109	4.62028	6.53823	4.22922	9.90489	9.21081	6.85198	2.20907	1.8946	2.34021	5.99277	4.1151	4.02466	10.94	9.00756	6.82567	2.67453	2.73727	2.3709	4.56938	6.73155	2.68387	10.9898	7.17541	8.41901
VIT_06s0004g06390	UDP-glucose glucosyltransferase	2.68005	4.23273	2.753	0.739911	0.767773	0.330535	0.2775	0.353227	0.608107	2.94914	5.83244	4.09266	0.502791	0.631783	0.354885	0.328913	0.352878	0.690774	2.80523	4.67715	3.556	0.894211	0.521342	0.216682	0.561621	0.367375	0.473614
VIT_05s0049g00830	Activating signal cointegrator	2.68401	2.91448	3.22643	1.57022	1.41936	2.71909	2.87842	2.84994	1.77276	2.45837	2.47198	3.00289	2.15955	1.242	2.56677	2.48943	2.36568	1.29321	2.73163	1.99778	3.05948	1.47148	1.37598	1.80022	2.61562	2.48629	2.14826
VIT_08s0040g02520	Inositol-1,4,5-trisphosphate 5-phosphatase CVP2, type I	2.69667	1.98919	4.2509	12.52	12.4946	13.9459	21.6895	14.2858	16.2174	4.20922	1.7785	4.2457	11.7701	12.5621	16.9318	24.9145	16.0753	20.7675	3.09235	1.45024	3.63192	10.6752	9.89883	12.0848	15.857	10.3515	14.7082
VIT_00s2466g00010	Exo-1,3-beta-glucanase	2.72447	2.86184	2.84886	6.36684	10.5243	5.42929	15.5096	12.8987	10.7803	2.46412	2.41528	3.46615	7.54559	6.65501	6.96931	9.46315	9.91847	7.78367	2.76638	2.67063	2.60325	7.63283	7.33536	4.22816	16.3904	10.46	11.9908
VIT_11s0118g00420	Heparanase protein 3 precursor	2.78653	4.19718	0.709935	45.8011	48.2571	25.3487	17.962	10.5269	4.7066	4.73004	5.71852	1.33491	40.1697	43.1401	29.1955	18.0337	12.0472	5.16398	3.09462	5.37845	1.64169	48.4209	40.0712	26.2772	15.2936	5.75739	6.13506
VIT_09s0070g00590	Dihydrolipoyl dehydrogenase	2.82847	3.18763	3.00183	3.39721	3.62869	4.46139	8.20912	6.78028	6.53588	3.08929	3.94726	2.44252	3.58502	4.84833	4.31592	7.76271	6.61477	8.84953	2.50652	2.82575	1.32521	3.39465	4.07755	2.82033	7.37632	4.59692	7.30318
VIT_19s0138g00120	1,3-beta-glucan synthase	2.83082	2.37195	4.20538	14.8577	14.873	27.2545	10.839	10.8949	11.5064	2.63399	2.41434	2.42747	12.7543	20.4758	20.3452	10.8803	8.62421	10.1535	2.23362	1.62173	2.66681	15.6446	17.6196	24.3945	13.9952	9.00232	11.3695
VIT_14s0060g00790	Galactinol synthase	2.87288	3.19439	2.17527	28.4575	31.014	34.2446	1.21815	4.13994	2.80118	2.09116	3.85573	2.72835	25.6626	28.6074	14.9214	0.91356	1.67069	1.75484	4.12677	6.82784	2.14296	43.2423	32.0126	35.6373	1.88081	1.34744	3.15347
VIT_12s0028g00050	Beta-1,3 glucanase	2.87565	3.46757	2.35663	3.34055	1.27769	3.61227	0.936114	1.02715	1.62582	3.44764	3.02178	2.1793	1.84658	1.28387	1.45305	0.633516	0.606834	2.09455	1.97106	3.4303	2.79495	2.10053	1.46286	3.95452	0.707846	0.704958	2.16707
VIT_19s0090g00630	Tetraacyldisaccharide 4'-kinase	2.97217	3.03793	2.75266	1.11197	1.0496	1.61228	0.270146	0.403966	0.733116	3.24547	3.08922	2.55956	1.57352	1.36899	1.48574	0.252948	0.37597	0.937377	3.22567	3.20036	2.34824	1.31013	1.36653	1.67687	0.207367	0.390764	0.985503
VIT_11s0016g03380	Exostosin-like	2.97775	3.0268	3.60452	1.28163	0.762228	2.08745	0.75057	0.987613	0.806109	3.75117	3.06837	3.76091	1.2109	0.875567	0.924735	0.691741	0.962082	1.1043	2.6729	3.23238	4.37516	1.38364	1.07521	2.26121	0.699132	0.511594	0.959459
VIT_14s0030g01030	Alcohol dehydrogenase	3.05806	3.81591	2.18539	0.588521	0.121313	1.16742	0.248993	0.384497	0.351007	3.2659	3.96928	2.94065	0.417601	0.421004	1.47508	0.05596	0.315497	0.151232	1.6962	3.38914	1.47418	0.2197	0.437469	1.21652	0.226698	0.241751	0.18842
VIT_00s2077g00020	Alkaline alpha galactosidase II	3.10207	3.32849	2.95022	0.157136	0.0997854	0.250237	0.0778656	0.0244133	0.0199104	4.10424	2.84809	2.69898	0.197306	0.0900447	0.162409	0.0406813	0.0646637	0.0693147	4.01529	3.05948	3.3667	0.217791	0.0670164	0.327247	0.031128	0.0181462	0.0680946
VIT_04s0008g02820	Glycosyltransferase family protein 47	3.14851	3.06491	1.7016	3.63272	3.55588	2.7938	3.87778	3.88146	4.30341	3.17877	3.17605	2.42873	2.96207	3.00132	3.43863	5.04572	4.73245	5.7112	3.07734	3.4267	2.15796	3.68859	3.01948	3.41492	4.85773	3.58708	6.17266
VIT_04s0044g01280	Beta-1,3-glucan synthase	3.16071	4.44849	3.46667	1.52615	1.82892	2.63602	1.73717	1.54914	1.19191	3.44555	5.68821	3.15529	1.98113	2.40778	1.89474	1.98786	1.6598	1.27072	3.46453	4.94857	3.35953	2.46616	2.10574	2.66023	1.93182	1.37163	1.50176
VIT_09s0002g02940	Myo-inositol oxygenase 1	3.20001	3.82173	2.15688	52.0839	46.3979	47.2645	107.904	69.9458	85.5167	8.85113	7.9432	2.85129	60.739	44.7104	56.6576	118.264	70.9438	76.3772	3.61777	3.64424	3.4128	33.8874	50.38	50.0345	91.1677	72.0215	74.7899
VIT_16s0050g01610	UDP-glycosyltransferase 88A4	3.2008	4.22965	1.8344	3.89688	2.88559	2.08125	1.52524	0.674517	1.14607	3.7271	5.31458	2.94914	3.89292	2.23576	3.12067	1.74311	0.761791	1.22929	3.43453	8.42071	3.15059	4.68678	3.91605	2.89211	2.24077	0.776051	1.61618
VIT_05s0049g00880	Activating signal cointegrator	3.27849	3.12266	4.18356	2.6239	2.00406	2.93071	4.07751	3.10162	2.123	2.71215	3.02118	3.02355	2.73542	3.34209	1.3172	0.997469	2.50406	3.86625	2.5598	2.54046	2.60044	2.8827	3.0434	2.7922	2.67117	1.95651	1.80305
VIT_14s0066g00350	Glycosyl transferase family 17 beta 1,4 N-acetylglucosaminyltransferase	3.29474	2.46854	2.98194	3.96841	3.20929	3.33042	4.4451	2.88558	4.05021	3.76216	1.63028	2.76339	4.43195	3.61416	4.21767	4.18732	3.80699	5.28034	2.26546	2.18224	2.97675	3.17589	3.65159	3.27262	4.21594	3.72425	4.81034
VIT_18s0001g14910	Mannitol dehydrogenase	3.34215	4.33361	4.69493	16.361	16.2684	10.8358	3.58503	2.91842	3.06789	5.38391	3.71192	3.82752	17.6475	18.0027	11.988	4.44519	4.21868	5.56862	3.64726	2.71515	6.82459	11.6362	10.9009	8.77894	2.95907	1.43745	3.72024
VIT_19s0090g00920	Glucan (1,4-alpha-), branching enzyme 1	3.40459	3.75828	3.00332	1.35292	0.890241	1.91475	2.0404	1.77099	2.89405	5.64427	4.3589	2.40621	1.52086	1.536	2.60803	2.14706	2.49597	3.41852	3.49502	4.03449	2.71734	1.45874	1.32445	2.01481	2.0815	2.44489	3.04897
VIT_11s0149g00280	Chitinase A	3.41801	2.84256	3.47314	0.159387	2.80316	0.100911	0.606388	0.350537	0.583562	1.22768	1.40787	1.93724	0.446024	2.61865	0.139424	0.310193	0.707361	1.47647	8.06983	2.03289	2.84735	0.547067	2.17703	0.119313	0.251665	0.8923	1.2637
VIT_17s0000g03230	Alpha-mannosidase	3.45017	3.14518	2.78959	7.0031	6.19718	5.54029	0.221159	0.948854	0.525299	3.06248	2.45465	1.82727	5.2707	7.32649	4.17302	0.234483	0.692437	0.810134	4.4718	3.24808	2.65333	6.20405	6.9017	5.90425	0.167034	0.567635	0.55107
VIT_04s0008g03610	Xylan synthase	3.45178	4.07742	5.05382	2.77272	2.79183	4.06866	0.92845	1.05695	1.55521	3.68645	3.50346	5.17169	2.45463	2.42281	3.16465	0.993014	1.45126	1.4055	3.5761	3.84247	5.38531	2.73472	2.94297	4.5798	0.7595	1.26879	1.70192
VIT_10s0092g00090	Ribose-5-phosphate isomerase	3.4769	3.53324	2.33915	1.62816	1.43933	2.95409	1.20765	1.99373	2.18112	4.01743	3.13712	2.41775	1.88398	1.62117	2.83177	1.20469	1.61821	2.25788	3.37046	2.97271	2.36882	1.95565	1.55271	2.41995	1.25921	1.60664	2.82926
VIT_00s0229g00190	Inositol 2-dehydrogenase like protein	3.48922	4.56212	2.28964	7.64819	8.59911	7.20207	0.670362	0.83815	0.731924	4.1436	4.07993	2.49323	10.6992	15.2449	6.57275	0.847147	1.42752	1.09823	3.56551	3.54151	2.05752	13.9076	9.75174	7.89978	0.905431	0.728009	1.54237
VIT_13s0073g00240	Glycosyl transferase family 1	3.51692	3.07286	2.48097	2.58752	2.54377	2.30121	1.52567	1.25946	2.40368	4.09935	3.0702	2.70998	2.09742	1.86833	1.78338	1.6726	1.70196	2.70206	3.10291	3.68546	2.54136	2.54373	2.23523	2.21677	1.62552	1.72278	2.92589
VIT_06s0061g01340	Phosphoglycerate mutase	3.54348	3.04731	6.78003	3.31742	2.97586	4.1752	3.99504	1.91267	2.99186	4.34791	2.0266	4.74716	4.15209	2.61894	3.76044	3.54359	3.11143	2.59061	3.67327	2.58447	6.35252	2.73891	2.70046	3.65509	3.67931	2.75538	3.21493
VIT_14s0006g00520	Glucan endo-1,3-beta-glucosidase 3 precursor	3.56537	3.42611	7.73737	11.3748	6.44182	15.2802	1.6478	1.80273	1.92345	3.82158	3.75537	4.31976	10.4972	8.68487	14.3442	1.40402	1.49988	2.87999	2.60316	3.03593	6.47116	9.23967	7.5371	16.0096	1.01126	0.928458	2.77298
VIT_13s0320g00040	Glycosyl hydrolase family 20 protein	3.59113	2.59154	2.89453	3.2228	3.08097	3.13565	0.803346	1.25989	1.47945	3.80303	2.72745	3.91198	3.23794	3.05541	2.5967	0.631187	1.19082	1.69202	3.46067	3.39012	3.78726	3.99168	3.63708	3.12679	0.712463	1.19051	1.49949
VIT_12s0057g00890	Glycosyl hydrolase family 17 protein	3.59399	4.16926	4.95193	2.64352	2.43485	3.23974	0.739435	0.930022	1.33031	4.52529	3.66878	5.80474	2.33883	2.03757	2.38032	0.617765	1.16042	1.67622	4.10605	4.28491	5.08098	2.946	2.38609	3.66003	0.780934	0.823354	1.36336
VIT_00s0265g00030	Deoxyoctulonosic acid synthetase	3.61927	3.40494	5.30014	10.2159	10.227	13.4202	9.02036	9.75401	8.96914	3.94093	3.08654	3.44268	10.6201	11.1976	15.8804	8.97409	8.92643	10.427	4.1242	3.1556	4.07473	10.7072	11.0806	14.8344	9.00961	9.39611	10.9402
VIT_02s0012g00170	1,4-alpha-D-glucan maltohydrolase	3.63679	2.79566	17.383	138.817	88.7532	132.45	168.841	90.2201	89.3698	5.2281	4.01032	10.5596	149	149.693	208.226	233.734	157.676	134.085	2.82378	2.89921	13.2251	113.383	111.93	130.267	148.79	163.362	95.6742
VIT_08s0007g00160	Glycosyltransferase family 14	3.64422	2.90184	3.66234	3.59905	3.88774	2.54853	2.55319	1.96593	2.72024	4.97215	3.27066	3.7377	4.94142	3.1284	4.27904	2.66584	2.08531	3.11756	3.9995	2.85833	3.80048	3.73305	3.50212	2.4144	2.28259	2.10151	2.41663
VIT_06s0061g00560	Exostosin FRA8 (Fragile fiber8)	3.66301	5.74313	5.79305	49.18	46.2434	42.1694	17.1318	27.0298	28.2533	4.33696	6.60394	3.63907	42.5198	43.3237	34.7974	18.7017	28.6058	32.4173	4.17795	5.51189	4.48161	50.0427	46.3839	37.4601	19.5756	27.9825	29.5948
VIT_07s0191g00250	Exo-1,3-beta-glucanase	3.67778	3.61525	4.60583	11.6503	13.9419	11.2643	29.1541	26.6092	23.0063	4.39717	3.89	4.58399	13.8563	12.8699	13.0431	26.1313	19.9904	19.5363	2.79717	2.77201	3.68568	17.869	10.0472	11.4273	32.1516	21.5893	20.9577
VIT_05s0094g00340	Chitinase class IV	3.70073	57.4547	13.6396	8465.2	22427.4	6393.65	7966.8	11946.2	6038.86	7.47658	42.7565	14.4135	12441.3	15942.4	7467.4	9655.38	11087.7	7304.7	25.0629	49.821	22.4015	16078.2	17534.4	6668.63	11021	6506.44	8573.18
VIT_09s0002g07770	Beta-galactosidase	3.73172	4.71576	3.96474	1.43719	2.66597	2.34023	2.67161	2.63971	2.85151	4.96106	4.19707	3.17452	3.3821	2.60731	2.17111	2.23506	3.45502	1.95232	4.56956	5.43616	4.12457	1.82892	3.76398	2.1634	3.14785	2.82875	3.13222
VIT_08s0056g01520	Acetylglucosaminyltransferase	3.73881	2.43069	3.30769	2.61728	2.97866	2.52158	0.843197	0.906417	1.37406	3.60827	2.06297	2.94653	3.7329	2.16335	2.54658	0.875705	1.3372	1.89214	3.25562	2.67333	2.54718	2.83572	2.32376	2.45117	1.02272	0.976358	1.79353
VIT_15s0046g02620	Beta-amylase 9 BMY9	3.75545	3.8482	5.27285	7.54674	7.96592	8.33614	2.80128	5.42482	8.73989	4.09152	4.97706	5.18535	8.1883	9.97066	8.70155	3.16441	4.94747	8.17642	3.01271	3.99585	5.40469	7.74708	7.78277	8.16752	3.11287	3.97553	9.7569
VIT_14s0128g00520	Alpha-L-fucosidase 2 precursor	3.78926	6.73644	1.58662	7.73135	11.7814	4.87447	2.60685	4.18448	4.37379	4.78677	8.09097	2.47359	9.96817	12.7819	6.16847	3.4407	7.52288	5.60637	6.30269	7.25061	1.4668	10.0159	12.9469	3.90078	2.8351	8.04054	4.85319
VIT_07s0031g02590	Beta-galactosidase	3.81807	5.66763	1.62998	0.458963	0.261416	0.70855	0.32153	0.429363	0.309708	4.15068	6.6943	2.51365	0.389084	0.61051	0.604817	0.234085	0.42223	0.369374	3.70151	4.55084	1.80702	0.591245	0.49721	0.488793	0.417191	0.402462	0.427543
VIT_15s0021g01320	Alpha-1,6-mannosyltransferase	3.84186	3.97908	4.02062	3.51916	2.87506	3.88846	3.78747	4.17767	5.14122	3.90146	4.62171	4.20169	3.59779	3.23673	3.82081	3.66684	4.2019	4.63556	4.22948	3.12996	4.1041	3.02992	3.59663	4.04307	3.80121	4.14399	4.95321
VIT_12s0055g00840	Sucrose-6-phosphate phosphatase	4.04449	3.43245	4.42362	6.71331	5.98231	7.53028	9.05512	6.91079	7.62379	4.26494	3.4485	3.84247	6.78758	7.01531	7.38402	8.80713	7.1384	8.9064	3.99359	3.33821	4.40944	6.67251	5.88678	6.4655	9.09056	7.64324	7.07196
VIT_14s0060g01410	Dihydrolipoyl dehydrogenase	4.09704	4.45179	4.68157	1.36407	1.22044	2.45384	1.79275	1.20563	1.75336	4.2825	4.99198	5.09895	1.37101	1.58509	1.63246	1.82669	1.26837	1.99705	3.75744	3.11834	5.07481	1.83999	1.61169	2.52372	1.29526	1.50551	1.43336
VIT_18s0001g05030	Glucan 1,3-beta-glucosidase precursor	4.10457	3.70389	3.43346	12.3622	18.6446	5.01883	4.35005	9.50935	8.84703	4.53221	4.0037	3.51429	16.2207	21.4435	4.40181	4.79983	12.9637	12.113	5.27837	2.78386	4.49139	14.0513	14.7985	4.0389	3.28845	10.0422	8.24868
VIT_08s0007g06080	Beta 1-3 glucanase [Vitis vinifera]	4.14005	3.11522	3.43132	2.41267	2.04812	1.31804	0.15245	0.392474	0.135462	3.7361	3.07249	3.62082	1.61719	2.4695	1.70578	0.185856	0.199697	0.349597	4.35272	3.68537	2.74333	2.85359	1.66399	2.17761	0.264589	0.291568	0.299764
VIT_00s0225g00140	Ribose-phosphate pyrophosphokinase 3	4.18256	3.24551	3.23308	2.82459	2.98061	3.99239	1.83145	1.3426	3.26395	4.22443	2.89993	3.99485	3.09754	2.47908	3.80313	1.89844	2.53387	4.00919	5.00509	2.52095	3.66594	2.66579	2.72927	2.78244	1.59368	2.56299	4.2911
VIT_07s0005g00370	Glycosyl hydrolase family 1 protein	4.19491	3.91698	4.87192	0.536535	0.244673	0.212518	1.66272	1.04188	1.15089	4.10618	2.46283	4.32994	0.218123	0.293496	0.459698	1.01925	0.86807	0.971484	2.98742	3.67758	5.25677	0.12936	0.37169	0.377884	1.48269	1.58763	1.36561
VIT_12s0055g00160	UDP-glycosyltransferase 71E1	4.26017	7.57777	3.03438	2.46807	2.7577	1.35645	0.843654	3.14982	1.56756	4.20927	5.91257	4.51127	1.71971	3.31758	1.558	0.907172	2.88729	2.86688	4.68717	6.06003	3.13967	3.05553	4.06367	1.83805	1.2716	4.41929	3.9259
VIT_02s0087g00330	Glycosyl transferase family 1 protein	4.36906	6.58085	5.01501	13.6708	23.8168	5.9558	7.29131	21.9972	14.8564	4.7668	4.63257	5.19673	12.6034	21.9217	12.5496	7.94616	18.2198	17.6615	6.59959	5.17832	4.88274	14.0718	19.351	6.75919	10.9125	23.5645	23.0983
VIT_00s0878g00020	Stachyose synthase precursor	4.38432	4.58923	4.43952	0.247717	0.118611	0.401471	0.0472296	0.0511649	0.00984247	4.90509	3.16564	3.32647	0.246014	0.0805829	0.253843	0.0971645	0.0589478	0.12306	5.30677	3.44856	4.47944	0.156093	0.148217	0.449413	0.0435738	0.0335779	0.10328
VIT_07s0205g00070	Phosphoenolpyruvate carboxykinase	4.41007	6.41852	3.64862	19.6448	15.0847	18.9569	17.7988	23.7419	21.6684	5.00805	4.03806	3.1455	14.9082	21.0081	16.4018	21.1812	19.9904	25.7488	4.79235	3.20377	3.41271	25.3346	12.8757	18.6289	24.2814	18.9975	17.1722
VIT_15s0021g00910	Dolichyl pyrophosphate Glc1Man9GlcNAc2 alpha-1,3-glucosyltransferase	4.41207	4.50381	4.45554	6.85403	5.41555	6.50274	4.68188	3.79416	4.37733	4.86358	4.28844	5.945	6.22961	5.77227	6.10335	4.93115	3.68978	5.57246	4.28018	4.16959	5.63473	7.69672	5.99437	6.38219	4.63139	3.43957	3.60062
VIT_18s0001g02220	Beta-galactosidase / lactase	4.42	3.10107	9.71133	1.66625	1.3231	0.450584	1.3527	1.33938	1.00685	0.552205	0.843337	2.14817	1.50888	1.51605	1.68269	1.85496	1.07442	1.04387	2.962	6.02848	8.66139	1.34772	1.78521	0.582684	1.21462	1.04333	1.96533
VIT_08s0007g08120	Exostosin	4.46497	4.0259	4.64045	7.31199	9.07015	6.07874	3.45836	4.91638	8.34015	3.24249	4.19919	5.52194	6.598	7.91141	13.9002	3.54797	4.88759	8.47245	6.79187	4.33199	5.26548	7.95241	8.11952	7.6769	3.87504	6.35163	10.2532
VIT_12s0034g00040	UDP-glucose glucosyltransferase	4.50543	5.62454	4.20012	2.78862	2.44905	2.6305	3.00945	2.56827	3.68084	5.2666	5.21173	4.62127	3.06692	3.82629	2.36693	2.37647	2.79202	3.1634	4.2932	6.1315	4.80527	3.22506	3.02852	1.74412	2.7546	2.09412	3.86072
VIT_14s0060g01330	Lipoamide dehydrogenase	4.55235	5.33935	1.76651	1.73918	1.65948	1.70756	1.52427	2.4573	2.3636	4.51972	7.85194	3.70257	2.07817	2.86027	2.24113	1.82298	2.43286	2.6301	5.06923	5.34669	1.56221	2.27136	2.41388	1.57904	2.24093	2.30301	2.79817
VIT_08s0007g04590	UGT73C2 (UDP-glucosyl transferase 73C2)	4.55388	7.59038	5.84349	0.630685	0.821744	1.2001	0.285484	0.347199	0.260279	6.22293	7.78294	6.19335	0.579305	0.972352	0.923326	0.259664	0.59752	0.407646	5.78322	8.22215	5.7877	0.657311	0.88577	1.34424	0.189368	0.592454	0.285451
VIT_00s0341g00040	Exostosin family protein	4.66722	3.82988	3.64332	4.85604	3.90649	4.75385	9.61658	7.28326	8.77934	4.94064	4.39298	4.20854	5.30283	5.76337	6.23363	10.6599	8.68211	9.4617	5.05397	3.69418	3.62978	4.80885	4.45597	4.0548	11.0391	8.23441	8.92518
VIT_17s0000g03190	Glycosyl transferase family 28 protein	4.72274	4.94032	8.55168	3.55539	3.95183	4.19504	7.43018	4.76895	4.8433	5.00313	4.47006	7.95869	4.6767	3.71841	4.98594	7.64198	4.58863	4.19563	4.95927	4.73723	8.48755	3.94978	4.71957	4.36058	6.05811	4.58381	4.50591
VIT_00s0250g00030	Glycosyltransferase family protein 1	4.75188	3.9249	12.9687	11.2729	9.21306	14.5298	24.4756	18.108	16.0318	3.78508	2.7515	7.26083	8.9944	11.0901	15.3383	23.671	17.066	18.2904	4.38353	2.61692	12.7055	8.9859	9.29055	15.9835	24.4323	16.122	15.587
VIT_02s0025g01610	Phosphatidylinositol 4-kinase type-II	4.78424	4.03022	5.72739	89.3251	88.2944	61.2207	65.6761	52.6465	36.1563	4.34173	4.56761	4.56576	84.829	78.2656	62.8316	62.6847	44.5224	28.4645	5.36854	4.46819	6.21839	70.4542	73.5054	50.8204	64.6371	27.154	36.0771
VIT_06s0004g06250	SETH2; transferase, transferring glycosyl groups	4.83946	5.44817	6.07306	5.49271	5.20026	6.0397	10.7496	10.8839	10.8141	5.35105	5.60086	6.29645	5.16901	5.22316	6.76969	9.74502	10.2466	8.86541	4.45838	4.50613	5.11723	4.48144	5.15093	5.66383	10.8313	11.1446	10.3521
VIT_18s0001g07070	Phosphoenolpyruvate carboxylase kinase 2 (PEPKR2)	4.86628	4.48103	5.92197	10.5141	10.1975	10.4535	15.8525	12.428	13.0186	5.83261	4.5279	6.35409	11.4372	11.9219	10.9697	16.0675	14.1206	14.3105	5.28411	4.21824	6.03266	10.3244	10.4438	10.6979	16.6401	14.1512	12.0427
VIT_00s0199g00220	Phosphofructokinase	4.89046	4.06844	4.58856	1.72812	2.60025	1.86086	2.76075	2.77103	3.0058	4.59004	4.31482	5.83305	2.09515	2.41693	1.89877	2.98188	2.71102	2.90615	4.71162	4.73367	5.45207	1.94906	2.41452	1.87674	2.76302	3.04976	2.59261
VIT_14s0108g00270	Aldose 1-epimerase	4.91793	8.31851	7.34388	4.8418	6.05425	5.70829	3.13413	4.1249	5.05299	7.67769	6.13289	4.44322	7.36792	8.25568	6.7802	3.71957	7.68136	10.0369	6.24304	7.2759	7.96359	6.70776	7.68846	5.88081	2.78949	5.71966	6.00203
VIT_12s0055g00200	UDP-glucose glucosyltransferase	4.98835	8.66516	3.20178	1.00647	1.67455	1.45914	0.157286	0.984962	0.653759	5.10736	5.98073	3.78156	1.42273	2.37964	1.5003	0.08784	1.08286	1.02686	5.6078	6.6002	3.88372	2.31842	2.40279	1.64927	0.307486	1.50839	1.09143
VIT_08s0007g05870	N-acetylglucosaminyl transferase	4.99236	4.72258	6.7412	8.58603	6.76146	9.00671	16.7834	11.0546	11.2053	4.67173	5.19697	6.09755	9.37569	7.81528	8.46506	16.7425	12.5158	11.6676	5.81033	4.26673	7.22996	9.56566	7.80263	9.60808	15.0632	13.7927	9.25213
VIT_17s0000g08200	Phosphoglycerate/bisphosphoglycerate mutase	5.03538	3.26205	4.28838	2.22303	2.2043	3.72696	0.323523	0.813874	1.20048	5.24567	3.51102	3.86769	3.45008	2.41941	2.41467	0.498563	0.58515	1.04546	4.10752	4.4228	4.52681	3.03522	2.52678	3.25788	0.421237	0.625664	1.71299
VIT_00s1525g00010	GAE3 (UDP-D- glcucuronate 4-epimerase 3)	5.03541	3.70135	6.23444	17.6028	16.1552	18.6196	20.2388	16.1417	15.0024	6.63893	6.15172	5.36027	17.4188	18.7668	26.4104	20.533	18.39	16.6103	4.47497	3.02143	5.84862	16.2708	17.5449	18.6163	21.2411	14.4582	13.2148
VIT_08s0007g01050	Aldo-keto reductase	5.04988	7.12303	4.41829	0.576231	0.619354	0.970903	0.0292694	0.337155	0.424056	5.69021	7.75212	6.09763	0.69808	0.74757	0.788346	0.274806	0.255438	0.715802	4.56122	8.89066	5.96589	0.807106	0.551063	1.20437	0.290124	0.127362	0.794509
VIT_00s0340g00040	Beta-hexosaminidase beta chain precursor	5.06641	3.445	5.39217	4.13735	3.9837	7.43502	3.61815	2.13915	1.53218	5.74274	2.74415	3.56208	4.89432	6.52634	4.97851	5.85575	2.72458	2.56402	4.83167	2.48747	4.21936	4.69571	5.14006	4.59941	3.23303	2.00024	1.31803
VIT_06s0004g07280	UDP-glucuronosyl/UDP-glucosyltransferase	5.11259	8.34155	4.9641	3.46277	5.15083	3.08936	0.782259	1.92375	2.86576	4.73645	10.8832	3.32576	4.05905	6.48883	4.84036	1.70631	4.08286	4.21817	6.34139	11.4175	3.66351	3.89905	8.96494	3.69362	1.12035	4.22594	4.41477
VIT_08s0058g01480	1,4-beta-mannan endohydrolase	5.21291	5.72483	4.55645	45.6712	36.7364	40.0364	17.9141	23.8616	19.3414	6.67042	5.40773	3.50657	36.6458	44.2982	38.5678	22.1738	20.6398	22.2927	7.36125	6.19464	5.49182	38.5035	46.1664	41.5419	19.4729	20.9409	20.7644
VIT_09s0002g06420	Lactoylglutathione lyase	5.31852	3.82169	5.06772	142.152	140.515	99.8037	162.402	233.7	256.888	5.34406	4.19693	4.14245	84.0597	88.5524	96.4061	127.654	109.808	183.129	2.93054	5.12521	5.69299	153.015	153.019	117.741	217.034	192.328	217.799
VIT_10s0003g03770	Pyruvate dehydrogenase beta subunit	5.35483	4.90454	5.43236	3.68344	6.0811	4.33799	5.90202	4.91732	3.79936	4.89527	4.92434	5.59007	4.58237	3.1337	5.21015	5.32068	5.05882	3.04592	5.74264	4.87557	5.29442	3.19163	5.83731	4.03429	5.2541	4.00528	4.03032
VIT_18s0001g05060	2,3-bisphosphoglycerate-dependent phosphoglycerate mutase	5.42082	3.96326	4.59918	6.10319	11.4104	4.01079	3.48117	5.49524	6.26703	2.95833	5.20288	2.27638	5.22197	14.6787	4.07323	3.20732	7.28161	8.08735	6.8818	2.83339	3.09402	8.11529	12.3599	5.00579	4.07705	11.0426	6.16343
VIT_05s0049g01110	Aldo-keto reductase	5.44605	6.28506	6.20261	2.62612	1.93005	3.23664	0.422376	0.476354	0.82047	5.98878	4.74045	6.85623	2.41412	2.36687	1.74192	0.466301	0.651344	0.872612	6.10662	7.18955	6.83116	2.08387	2.09006	2.76663	0.437243	0.483416	1.38149
VIT_15s0046g02640	Beta-amylase 4	5.45057	3.65805	6.25854	10.0453	8.06099	8.06382	12.0756	11.467	11.9142	5.21457	3.40761	5.67269	9.95869	7.87448	8.97413	12.0866	12.528	10.8921	5.91377	3.87407	5.5599	8.33579	8.11592	6.89959	10.8023	11.8758	10.4745
VIT_15s0048g00340	GAE3 (UDP-D- glcucuronate 4-epimerase 3)	5.4871	4.30887	12.723	17.8659	15.7135	21.7338	19.9245	16.8356	11.1817	4.76031	3.69142	7.47326	14.5968	14.1534	33.261	18.8091	18.3794	13.3601	6.26118	2.93166	13.4348	10.2532	14.2534	22.772	15.2175	18.0081	13.7161
VIT_06s0061g00280	2-phosphoglycerate kinase	5.57584	3.08902	5.18261	12.16	17.5817	5.04719	8.94751	17.6086	25.2008	5.30035	4.20104	3.01412	10.3246	17.7392	7.54107	10.0111	16.9383	24.07	8.43891	2.50129	5.11875	15.3109	14.8199	5.78802	10.768	19.3006	19.9552
VIT_01s0011g05740	UDP-3-O-acyl N-acetylglycosamine deacetylase	5.60973	4.66545	7.5285	2.86486	3.50196	3.8165	2.69513	3.66598	4.35536	3.76253	4.84408	7.11757	2.95151	2.90011	2.20771	2.70588	4.32221	4.31844	5.60948	6.16472	6.45024	3.051	3.8124	3.9701	3.12169	4.21649	3.81837
VIT_01s0127g00470	Galactinol synthase	5.61105	4.49908	6.4864	26.2966	58.0671	33.4098	20.9607	42.9061	142.471	4.92941	6.5228	6.52712	13.961	18.4092	26.1288	15.3384	26.4424	62.8699	4.01081	6.85353	5.96112	115.934	46.5841	35.677	39.8645	37.593	294.511
VIT_08s0007g06060	Beta 1-3 glucanase	5.67529	21.642	7.31859	1.9048	12.7348	2.64956	0.20812	0.136869	0.662617	15.7056	10.1807	5.25112	2.91672	8.13359	2.81732	0.0698146	0.476376	1.23093	3.54973	12.8618	37.7752	3.23053	5.78943	2.65326	0.147902	0.274416	1.41154
VIT_12s0028g01670	Trehalose-phosphatase	5.74658	3.48565	9.54628	6.42541	6.58649	9.1205	0.366282	1.17771	0.551691	3.21489	3.42841	5.0277	5.4121	5.16171	7.93343	0.324467	0.826435	0.514302	6.94498	2.56474	8.7729	6.73339	6.29311	11.5162	0.250302	1.15299	1.23808
VIT_19s0090g01070	Glucan endo-1,3-beta-glucosidase 7 precursor	5.75808	11.2308	3.15507	1.90835	2.92014	1.36418	2.08634	2.25607	4.06615	12.9665	13.8477	7.43537	2.0849	2.53421	1.80698	2.3702	5.26198	5.29939	21.9171	11.5692	3.6103	5.96949	2.26131	1.51206	1.99649	6.28137	3.58692
VIT_13s0019g03060	Glucosyltransferase-2	5.77208	4.90066	6.80031	0.985613	0.703116	1.63919	0.54779	0.809756	1.19373	8.24498	6.99823	8.37131	0.896172	1.20262	1.65488	0.505224	0.958727	1.11569	4.92179	6.75787	6.29793	1.00877	1.15282	1.0784	0.492438	0.966272	1.25771
VIT_04s0008g03560	Lactoylglutathione lyase	5.81928	5.88248	5.68549	4.65788	2.91826	5.51293	0.754628	0.838955	1.24532	6.7113	5.11491	5.04286	5.95725	5.64352	4.77608	0.685202	0.719338	0.828913	6.72962	4.57612	5.63813	4.36082	3.62029	4.27607	0.723641	0.271676	1.08889
VIT_18s0001g05300	Trehalose-6-phosphate phosphatase	5.90253	3.59187	0.627016	55.638	71.0095	13.8199	0.152608	2.57846	4.31699	4.74918	5.2385	2.43753	54.177	63.3356	12.1954	0.258031	2.99366	3.99028	9.77895	4.47388	0.629422	83.399	68.5004	16.67	0.19822	4.10664	2.32826
VIT_16s0013g01720	N4-(beta-N-acetylglucosaminyl)-L-asparaginase	5.91875	5.43972	5.47028	5.17099	4.06976	5.4952	11.8122	8.9865	6.60094	4.77718	4.56693	5.71181	5.98478	4.20138	6.69516	9.25222	7.30382	5.06887	6.44243	6.14258	5.26155	5.57649	7.06961	6.57484	10.2783	8.49766	6.83595
VIT_00s0218g00090	Exostosin family protein	5.9251	5.41106	11.2531	10.5125	10.9355	13.041	5.73197	5.24819	5.85978	7.36804	6.07721	9.78498	12.5105	10.029	15.2856	6.29039	6.00352	5.19362	6.00823	5.77776	11.7348	10.1702	11.931	12.9148	5.64066	4.5504	6.16697
VIT_08s0007g07470	Galactose mutarotase	5.94708	6.50626	8.33588	0.812146	0.426455	2.10698	0.174198	0.109035	0.523602	8.13544	4.90767	6.39818	1.03294	0.517874	1.45785	0.183801	0.287028	0.576512	5.61673	5.68211	9.69005	0.715243	0.749535	1.38071	0.0800655	0.34222	0.48871
VIT_00s2207g00010	UDP-N-acetylglucosamine pyrophosphorylase	5.9614	4.60456	2.86287	7.87059	10.9811	6.12536	21.3994	20.8175	28.0137	5.20101	3.85507	3.79514	6.90208	7.65946	6.84357	18.0248	20.1728	18.9723	5.90777	7.0535	4.32933	7.26254	9.69297	4.6304	23.1822	23.4566	21.2865
VIT_02s0025g02170	Trehalase precursor	5.96536	7.62966	3.89003	12.0629	16.7602	13.4386	47.6167	24.5478	28.9804	5.80645	8.03419	5.86641	13.5142	18.8148	15.2712	50.1033	27.2684	30.7625	9.43114	8.51516	4.03249	13.8938	15.5617	12.0035	44.1158	25.1308	24.3673
VIT_13s0019g02380	Exostosin	5.98099	6.62515	9.01823	5.40155	6.41788	8.60185	1.71049	3.42384	4.57475	5.94317	9.05533	9.84497	6.25294	6.42387	9.60621	1.93417	3.29846	6.42798	7.23892	7.83412	9.30512	6.50888	7.06355	8.17918	1.72041	3.89867	5.98616
VIT_05s0020g02880	ADP-glucose pyrophosphorylase	6.02573	6.53293	5.59393	0.453272	0.138445	0.343083	0.119933	0.0365296	0.0320661	7.29389	5.96828	4.91579	0.734729	0.41826	0.358488	0.0501694	0.108598	0.0472092	8.67406	7.02139	8.09423	0.383131	0.327507	0.583724	0.0776403	0.0663897	0.117953
VIT_05s0094g00220	Chitinase class IV	6.11814	6.40098	8.43122	2.50285	18.451	1.90602	1.54447	1.5127	2.47585	3.52765	6.02693	4.34295	2.88401	14.1595	1.85921	3.34295	4.82228	3.60885	11.7894	6.60896	6.15284	2.25961	15.2622	1.39664	0.837762	8.68782	2.79797
VIT_06s0004g03840	Chitinase 2	6.15148	6.80213	6.68728	23.3191	23.7973	21.5828	20.8885	21.57	21.9798	6.711	6.80122	5.59179	22.5523	23.1416	23.3072	24.36	18.2795	29.4717	6.33917	6.09239	6.3854	36.5772	25.341	24.1063	28.4474	15.2386	24.3857
VIT_14s0068g00420	Alpha-amylase isozyme C2 precursor	6.18637	5.20244	8.97614	9.76697	8.48281	11.6335	8.62392	8.37921	9.53621	6.873	4.50082	7.18677	10.2072	10.0023	9.62195	9.20319	9.11425	9.54991	5.21478	4.15102	7.94183	10.8493	7.94409	9.77071	9.26709	7.81909	8.80013
VIT_10s0116g00280	UDP-3-O-[3-hydroxymyristoyl] glucosamine N-acyltransferase	6.20699	7.48626	8.23906	4.23848	3.22951	4.84244	3.82323	4.20381	3.75453	7.06491	7.53735	8.12581	4.29155	5.21091	5.4121	3.99719	4.28943	4.1805	7.75818	6.63678	8.48066	4.80154	3.82884	5.88521	4.10748	3.61414	3.74021
VIT_14s0081g00760	Activating signal cointegrator	6.21346	6.65696	3.87452	4.53959	3.64379	5.09531	9.32099	7.89902	8.05119	6.08299	5.12945	4.87776	3.92281	3.66161	3.95516	7.49081	5.62197	7.3294	5.40588	5.82964	4.83549	5.17357	4.02394	4.93206	8.89662	7.40022	6.43462
VIT_14s0030g00160	Bisphosphoglycerate mutase	6.23043	5.23263	9.35868	6.76422	5.92704	6.91241	3.54648	2.96368	3.62492	6.01251	4.13989	6.99059	6.27652	7.50997	6.41302	3.68657	3.09702	5.35594	6.56748	4.07839	7.72903	7.44105	5.92322	8.50985	3.94441	3.31481	4.0858
VIT_07s0141g00830	2-keto-3-deoxygluconokinase pfkB-type carbohydrate kinase	6.37231	6.11951	7.23699	10.1585	10.9208	8.42081	14.9519	12.5541	13.3314	5.90432	6.15313	6.81513	9.83552	9.6151	8.8155	13.0907	13.4179	10.7168	6.79076	5.0574	7.89856	9.26014	9.46202	9.8734	14.7328	12.2528	12.543
VIT_05s0077g01250	Endochitinase A2 precursor	6.38667	5.81489	2.98492	10.147	8.27228	4.85367	0.613954	1.19907	2.2433	16.7918	49.5479	1.3284	8.22417	3.99784	5.06846	0.719184	0.961326	1.43623	7.11625	3.61609	2.11614	8.09627	6.48496	3.17676	1.29413	1.06152	3.13222
VIT_14s0060g00420	Pyruvate dehydrogenase kinase	6.41688	4.80436	8.48898	19.6841	26.9656	21.6721	37.5575	30.3039	25.092	5.94586	4.98139	8.6153	22.1416	18.0113	20.2852	34.2898	25.3173	18.9122	7.2201	5.30475	7.24252	26.04	29.9333	22.0833	44.2374	30.7687	23.9346
VIT_03s0063g00400	Alpha-amylase / 1,4-alpha-D-glucan glucanohydrolase	6.42447	9.08088	5.11997	17.1688	14.9867	8.20609	2.94318	4.27865	3.86976	11.6915	7.41179	5.15888	12.8012	13.0587	9.33954	4.39741	5.10505	5.56859	10.0914	8.18759	5.93459	15.1871	20.4956	8.62306	4.08154	6.817	5.47693
VIT_08s0007g04140	3-deoxy-D-manno-octulosonic-acid transferase	6.4299	6.76395	6.66671	5.53652	5.39259	7.22417	8.26611	8.14819	7.18769	6.33395	7.27103	6.34017	6.25378	7.08774	7.31726	8.73571	7.67507	7.27703	6.4091	7.7228	6.3622	6.74847	7.13435	7.34352	8.412	7.48504	7.72381
VIT_13s0019g03020	Glucosyltransferase-2	6.43361	5.73377	13.2841	23.7831	14.5807	20.9511	4.38398	12.0841	14.9052	5.84773	5.75242	9.6149	15.4684	20.1419	19.5314	5.59727	12.1619	23.1323	6.63255	5.24549	11.7169	16.1009	18.0309	17.3628	3.69844	12.1548	17.4305
VIT_01s0011g00240	Fructokinase-2	6.5229	7.56348	5.90313	6.7146	5.24321	6.18026	7.43892	6.40968	8.83855	7.41908	6.94129	5.8792	7.10041	7.1938	6.12431	7.22163	7.41421	10.0056	6.10572	6.6983	6.13501	7.3807	5.48773	6.62573	7.25689	7.48055	7.9795
VIT_08s0007g01020	Aldo-keto reductase	6.58363	7.1362	7.25719	6.18727	7.32806	6.82086	9.2487	9.70094	7.74407	7.0582	7.70111	7.81693	7.38906	6.77995	7.17414	9.62276	8.47748	6.43183	6.32626	7.32297	7.08648	6.00718	7.30788	7.8341	9.23936	8.47516	7.77587
VIT_00s0220g00180	Glycosyl hydrolase family 20 protein	6.61738	4.48707	6.70007	6.37742	3.73251	7.41039	2.80963	2.91386	2.13852	6.82432	3.18588	3.65642	6.0118	7.74783	5.76027	5.14136	2.69766	1.72161	5.94841	2.364	4.60484	4.93994	6.0822	6.15999	3.42205	2.41427	1.57502
VIT_08s0040g01610	2-phosphoglycerate kinase	6.61938	7.10537	6.24189	2.25363	1.83261	3.2456	1.86247	2.03225	2.21613	6.31848	6.79673	4.65276	2.00475	2.2145	2.45781	1.93542	2.22509	2.27719	5.87796	9.36279	5.31041	1.94226	2.09758	3.34678	1.58625	2.22669	2.93909
VIT_02s0025g00850	Lactoylglutathione lyase	6.64916	8.25663	6.62312	3.06433	3.68666	3.65619	5.4241	4.85005	4.26129	6.92864	6.27224	9.26043	3.49858	3.66342	4.64517	3.85328	4.49905	4.03808	7.63325	8.7318	6.40283	3.61179	4.5077	5.4174	6.57929	4.89459	4.84635
VIT_08s0040g00210	L-2-hydroxyglutarate dehydrogenase	6.82744	6.74843	5.62001	3.80907	3.95273	3.84888	5.77386	4.93733	5.76126	7.71714	5.45641	5.3332	4.55799	3.82543	3.70618	5.98592	5.75813	5.54198	6.32873	6.69233	5.47342	4.07972	4.40342	3.90107	5.96112	5.93575	5.21102
VIT_05s0051g00010	Beta-amylase 1	6.83565	6.12685	11.7705	4.31536	4.29285	4.5858	1.15549	2.12437	1.96429	6.2235	6.36885	11.1929	4.54274	5.03591	3.52241	2.11781	1.67075	2.26365	5.78388	7.78135	11.8841	4.91592	4.42133	5.81758	1.71375	1.44327	1.96333
VIT_13s0106g00380	Phosphoacetylglucosamine mutase	6.84887	7.57016	7.17912	4.77879	5.57954	6.73607	3.56258	4.30929	4.46448	6.75871	7.56409	8.43667	5.44809	6.68216	6.33294	4.12052	3.44016	4.44562	6.633	7.94048	7.75387	6.44087	5.87201	7.69963	3.698	3.55943	4.29706
VIT_04s0043g00310	Ribulose-phosphate 3-epimerase	6.84916	5.38022	7.89765	5.83896	6.69371	3.24833	3.07411	6.17139	3.19178	6.53429	3.92464	7.35849	5.72586	6.95905	2.81213	2.19453	5.85051	4.32396	8.04943	5.81004	6.65039	7.10801	5.8982	4.02311	2.54983	5.00759	3.02786
VIT_16s0050g02220	Acidic endochitinase (CHIB1)	6.9875	5.64078	1.21804	0.215135	0.810741	0.250143	0.535522	0.730629	1.22129	18.208	6.59659	2.75556	0.868491	0.453687	0.27361	0.948753	0.823386	1.10142	12.0068	12.862	3.04973	0.229456	0.462768	0.16003	0.352974	1.04428	0.660203
VIT_19s0085g01080	Polypeptide N-acetylglucosaminyltransferase	7.01088	6.84766	5.26157	5.01098	4.25945	5.7338	8.75564	9.2038	11.6078	9.07476	7.79415	5.09475	4.86064	4.48549	6.03485	7.77286	9.02322	10.9373	7.2023	5.39928	5.06813	5.63477	4.75715	5.46048	6.79294	9.54751	10.6228
VIT_14s0083g00880	Phosphatidylinositol 4-kinase type-II	7.02736	8.94554	6.0594	14.8014	17.283	10.8484	37.4969	46.6534	47.8166	8.86534	11.3868	7.96999	13.8219	15.2263	11.6389	37.9434	46.1042	41.3232	7.46057	11.0882	6.10872	14.6331	13.6142	10.0053	39.6825	55.8494	42.8189
VIT_03s0038g00380	Xylulose kinase	7.10186	7.17003	11.2946	7.70323	6.0752	14.6217	11.1556	9.8706	9.57967	8.64359	6.66024	9.04725	9.94106	7.34278	12.9854	10.7374	8.82285	8.3574	8.29233	7.59055	9.61634	7.34044	7.78417	14.9223	10.6554	8.60478	11.6056
VIT_08s0007g00280	DIE2/ALG10	7.13904	6.84606	7.32591	6.54504	6.15489	7.52192	5.66489	5.48062	7.19991	6.92912	8.12603	8.89545	6.315	6.65615	6.19305	5.68632	5.78283	6.73432	7.65639	6.85488	8.2939	7.4782	5.60945	7.32879	6.2503	4.79875	5.86662
VIT_01s0011g02020	2-oxo acid dehydrogenase, lipoyl-binding site	7.15416	8.62156	5.19084	3.75278	4.51509	4.69104	7.55928	6.60112	6.64211	6.80678	7.05296	6.50334	4.12375	3.56679	4.09699	6.39113	5.89343	7.53001	7.30006	9.51595	5.25844	4.27079	4.12895	3.02987	7.78376	7.82488	6.90989
VIT_08s0007g05490	Pyruvate kinase	7.17109	7.84147	8.46043	8.10232	11.9597	8.54513	6.47611	8.04254	8.23497	7.0802	8.44701	10.2123	9.35053	11.7792	9.90232	6.87262	10.0607	8.4691	8.55729	7.88796	7.83425	8.34707	12.5437	8.14255	7.45813	11.0852	8.78144
VIT_14s0128g00170	UDP-N-acetylglucosamine transferase subunit alg13	7.17116	7.06447	6.15171	5.74662	5.28046	6.80127	5.65353	4.84337	5.97952	6.24528	6.09814	6.9666	5.64306	5.72737	5.10048	5.05827	4.13964	5.79325	6.42699	6.30336	6.63568	6.78548	5.57144	6.12317	4.93445	4.32681	5.19996
VIT_16s0098g01180	Aldo/keto reductase	7.18482	6.82881	5.81977	1.86728	1.8107	1.92081	0.527405	0.731212	0.949609	8.64697	5.93704	5.45159	2.31794	1.69621	1.61941	0.476356	0.812156	0.743311	8.22476	7.11461	6.77109	2.05271	1.72549	2.30803	0.573549	0.545208	1.11861
VIT_16s0050g00240	UDP-glycosyltransferase 88A4	7.21488	7.70103	15.1694	2.6402	1.07802	7.4883	0.17083	0.448137	0.524988	6.16368	7.94946	10.8603	1.95383	1.57088	3.11781	0.300858	0.517575	1.38573	4.77207	8.02961	16.638	2.31463	1.38579	7.90416	0.194298	0.403285	0.779434
VIT_08s0007g04570	UGT73D1 (UDP-glucosyl transferase 73D1); UDP-glycosyltransferase	7.28266	10.695	1.98858	10.5032	18.221	5.322	0.316071	1.91413	1.54203	3.02489	8.65219	2.28425	9.52868	23.2524	14.2315	0.629749	2.74998	4.02209	19.2423	7.87356	1.5384	15.5275	15.9815	6.20861	0.779117	3.82094	2.43892
VIT_01s0150g00180	Exostosin	7.2846	6.46308	9.61504	10.4198	10.4901	10.7413	5.06082	5.71571	5.84505	8.69966	8.49191	6.87426	9.82999	10.2066	10.28	4.29421	5.82401	6.93288	7.79847	6.73604	9.41211	11.6417	10.1803	10.9196	4.84952	5.73134	5.1511
VIT_01s0146g00060	Glucose-6-phosphate 1-dehydrogenase 2, chloroplast precursor	7.28515	9.24595	18.1902	23.7272	37.4599	18.6309	23.5894	21.8177	20.7728	7.72358	10.9326	12.4274	23.9112	42.5389	22.0462	23.7732	24.7973	23.7505	11.4592	7.81572	12.1972	25.773	33.4402	22.6001	29.8095	27.5442	19.5785
VIT_02s0025g04900	Phosphoglycerate mutase	7.31006	5.44349	7.23628	13.0268	12.4123	14.403	12.2211	12.1454	13.8678	7.48	5.61478	7.3968	14.2438	12.0875	13.4329	12.7369	12.9051	12.1024	6.16807	5.26722	6.66946	12.7354	13.7486	14.6329	13.1461	12.267	12.3542
VIT_19s0085g01060	Polypeptide N-acetylglucosaminyltransferase	7.41403	6.86497	5.43411	5.33838	4.23112	5.53871	7.35826	8.22983	9.8229	7.99933	6.03539	4.70658	3.97802	4.72042	5.6747	7.13672	8.00294	8.09791	7.20673	5.68616	4.67629	4.2371	4.06953	4.66672	7.26098	8.72123	9.05697
VIT_01s0011g04680	Glycosyltransferase family 14	7.45671	5.49459	9.83093	17.1323	17.186	14.1748	24.5609	17.1496	19.9298	4.17826	6.29629	8.05437	15.864	17.5458	18.882	22.9359	17.3995	21.4677	13.3166	4.38632	9.02274	18.7142	18.9505	13.3727	28.0989	21.3516	18.3003
VIT_08s0007g01640	Fructokinase	7.49131	8.20114	9.8345	10.5459	7.77412	8.52856	5.56391	4.99694	5.46155	10.1424	7.42254	7.10871	9.20975	9.08092	8.68186	4.91538	6.3786	5.63226	8.03804	7.12885	10.0355	7.7336	7.89858	5.49422	4.02623	5.63763	4.99556
VIT_07s0005g00380	Glycosyl hydrolase family 1 protein	7.50735	5.75759	9.71155	1.43984	0.114704	1.2524	2.31101	1.87719	2.35392	6.49852	4.54462	8.31326	0.285668	0.565382	0.957313	3.01346	2.84327	1.99979	6.72862	4.69072	9.23492	0.464511	0.360157	0.472204	1.66809	3.31497	2.12683
VIT_14s0030g01960	Aldo/keto reductase	7.58209	7.20265	5.99335	13.8907	10.3031	14.274	11.3294	10.3941	10.4403	8.4375	6.78482	6.9261	13.7338	14.0624	14.4535	11.3709	11.3055	12.5816	6.8549	6.47724	6.27678	15.1147	11.5573	13.3714	10.3086	9.00157	8.79019
VIT_10s0092g00110	Ribose-5-phosphate isomerase	7.61737	5.76485	4.3534	2.52702	3.33514	6.00109	1.4647	4.01616	3.30956	8.18604	6.85076	4.93449	3.69659	4.15953	4.60225	1.34535	2.57927	3.14767	8.26403	8.96244	4.92044	5.33086	3.1796	1.4202	2.17596	3.49187	3.53572
VIT_09s0002g04880	Glycosyl transferase family 1 protein	7.63482	6.12204	17.039	6.11564	6.37375	8.28259	0.848407	1.96191	2.60568	8.56777	5.3888	11.355	7.22733	6.51282	6.82632	1.09555	2.23594	3.08404	7.42918	5.03155	18.6376	6.29861	7.451	8.76129	0.959481	1.71257	3.92052
VIT_01s0011g03450	Alpha-glucosidase	7.64628	9.71205	12.4822	2.90538	4.8831	3.10596	0.604939	1.18788	3.04445	15.3312	17.0211	12.7066	3.96182	5.83182	3.92023	1.32589	1.87695	5.48733	14.4367	7.8706	16.9143	4.59395	3.93861	2.95133	0.927867	1.08387	3.5485
VIT_13s0019g02890	Glucosyltransferase-2	7.65691	5.68857	12.2552	21.717	21.8791	23.9409	3.72182	10.1007	10.0581	5.51606	5.40702	11.9581	20.0877	21.5938	33.52	3.82202	10.2325	12.5874	6.03847	5.03117	12.3074	19.2224	21.6017	23.6756	4.90328	8.68167	15.3759
VIT_07s0129g00020	Glycosyl hydrolase family 43 protein	7.7113	6.90017	6.49976	11.1469	9.24677	9.5872	14.5651	11.7727	12.786	7.85653	6.02118	6.71052	9.70498	9.45637	9.52147	13.3443	11.7842	14.5263	6.67708	6.36473	6.57984	9.70894	8.88691	9.55241	13.376	13.2379	10.8807
VIT_08s0105g00480	Phosphoinositide 5-phosphatase	7.73859	6.64967	6.10203	5.79274	6.42659	8.03778	8.82223	6.99399	6.78202	8.47267	7.49514	6.31635	6.75772	6.93808	5.97145	8.1265	7.99891	6.73274	8.94938	5.73214	6.45503	7.89081	6.27998	7.70314	7.48802	7.20731	5.86919
VIT_08s0007g07480	Aldose 1-epimerase	7.87155	14.8879	5.02877	1.76647	1.42662	1.90822	1.4524	0.567793	1.01455	16.5011	16.9406	7.9149	2.07612	1.36296	2.21309	0.465814	0.398136	0.810572	7.71877	11.7106	5.47609	2.59118	1.17668	1.72684	1.35635	0.564324	1.02786
VIT_10s0116g01640	Glucan endo-1,3-beta-glucosidase 3 precursor	7.87743	5.7922	16.1032	18.26	18.5775	17.2568	16.257	13.2034	11.8271	7.06999	5.67458	13.0662	17.5244	19.2313	20.6922	18.2942	14.9867	13.6706	7.90207	6.44841	15.6884	16.5044	16.5502	17.5887	15.228	11.6589	11.7735
VIT_15s0048g00320	UDP-glucuronic acid epimerase 1	7.87743	5.99019	15.5716	13.0918	12.8701	16.0543	4.48976	5.84916	4.69032	5.59027	5.27016	9.25394	12.0178	10.8165	18.507	4.49559	7.96747	5.65247	8.99632	5.0188	14.5647	10.8899	11.7738	16.9446	4.37744	6.36658	6.22389
VIT_17s0000g09670	Stachyose synthase precursor	7.89024	8.5049	8.36235	4.9947	4.51817	6.85371	10.2135	6.93275	7.8651	9.84286	7.80055	9.19405	5.85003	4.64354	5.94447	10.7722	7.53405	6.30114	7.46106	8.40698	8.2488	5.18183	4.99042	6.14631	9.66522	7.04863	7.52337
VIT_12s0059g01600	Lipid-A-disaccharide synthase	7.9372	7.16354	7.83722	13.8029	14.2968	12.3627	17.7868	17.9317	14.4875	7.65544	6.52943	7.48443	12.6848	12.6125	11.2281	16.6661	14.9506	12.2446	7.02793	7.02819	7.12658	12.8748	13.0411	12.1937	17.2852	15.7617	14.3038
VIT_17s0000g01290	RGP1 (reversibly glycosylated polypeptide 1)	7.95671	5.19405	6.10879	5.29133	5.79322	4.10569	2.70895	3.85281	3.66026	9.4563	8.16764	5.32009	4.257	3.3624	4.20881	2.97035	2.31614	3.13874	9.77803	6.55041	6.25766	4.63149	6.9742	6.6572	4.0631	3.64011	4.39083
VIT_18s0001g15370	Exostosin family protein	8.07518	7.41511	8.57396	13.0953	12.7948	13.8839	20.9214	15.3738	13.0265	8.21142	7.37231	8.00859	13.6202	12.9897	13.1578	21.2888	15.7372	13.1732	7.34761	7.79412	8.87713	13.1857	13.559	13.6788	19.303	14.3805	10.6117
VIT_11s0016g02800	Myo-inositol oxygenase	8.25963	6.69731	4.49884	2.15097	2.62453	1.25074	0.375933	1.2932	0.370108	7.47659	7.25986	2.25044	2.26409	3.03164	1.85495	0.396337	1.37209	0.636269	13.9556	3.84787	3.88546	4.27906	3.16907	2.8882	0.696114	2.22757	0.703219
VIT_07s0104g00370	Isoamylase-type starch-debranching enzyme 2	8.26146	6.87795	10.6583	8.90994	7.27196	8.63542	9.27957	7.44418	9.01643	9.94458	6.79567	10.9788	8.17894	6.83273	8.92395	8.7757	7.90861	8.82116	5.71845	6.4281	11.2242	7.39197	7.12822	8.09287	7.9107	6.35309	7.29782
VIT_07s0141g00580	Glycosyl transferase family 8 protein	8.29517	6.78061	16.1969	45.4259	47.5723	47.2607	92.8704	70.6323	59.7463	9.54892	5.21907	11.094	44.561	48.8072	66.6021	86.9398	71.2611	59.9055	8.59733	5.78543	15.9792	44.9269	45.6292	49.8211	97.6644	67.8709	63.938
VIT_16s0050g01600	UDP-glycosyltransferase 88A4	8.39063	8.3629	10.949	4.32699	4.49493	5.20708	5.0371	4.35859	6.60759	6.35937	9.39174	10.9945	3.39483	4.28615	3.55291	5.5044	4.87934	7.8378	7.75662	10.1512	9.97712	5.28531	4.30756	4.37803	4.89876	4.70633	5.96508
VIT_10s0003g02860	UDP-N-acetylglucosamine transferase subunit ALG14, related	8.40235	8.00019	8.31074	9.93464	10.2195	9.52382	18.5658	17.3229	15.1135	7.68223	8.55058	8.96503	9.1644	8.93597	9.01643	18.7915	15.3304	14.2305	8.83877	8.11062	8.47027	9.15301	11.1913	8.39579	20.4005	17.979	13.8769
VIT_15s0021g02410	Malate dehydrogenase, cytosolic	8.40504	7.23628	11.0233	10.4405	9.81514	11.8614	23.2525	22.0967	21.8708	7.35398	6.04556	9.55618	11.2703	10.8246	11.201	22.2057	21.5582	20.3114	7.22988	8.254	10.9215	10.5092	9.70975	11.3109	21.8915	20.1846	20.9119
VIT_05s0051g00420	Glycosyltransferase family 14 Beta-1-3-galactosyl-O-glycosyl-glycoprotein	8.42763	7.0162	11.6118	19.849	16.9016	15.7634	19.0019	16.5492	20.8279	7.76479	6.77691	10.886	16.9826	17.4529	19.9396	19.0796	19.0189	25.5994	9.02566	6.25218	12.8396	18.7042	15.2842	15.2558	18.7382	20.3388	16.7697
VIT_09s0002g00380	1-phosphatidylinositol-3-phosphate 5-kinase	8.44368	7.82694	13.3401	20.376	18.0102	23.663	24.6971	23.9661	21.5599	7.37189	7.33002	9.10478	17.5467	17.6459	26.5436	23.3835	25.2987	21.5804	8.92778	7.54439	12.1613	16.7838	17.5678	24.1244	25.3822	26.5071	21.0118
VIT_00s0415g00080	Beta-D-xylosidase	8.47482	7.61944	5.51073	2.59561	3.30638	2.72185	1.75133	2.57686	3.33589	9.00994	6.86585	8.14	2.94568	3.06801	2.21218	1.88801	2.84048	3.10014	9.18008	7.61409	6.81674	3.02941	3.10318	2.815	1.96969	2.82963	3.01488
VIT_08s0007g07600	Pyruvate kinase, cytosolic isozyme	8.5391	5.49154	11.9278	8.07998	10.1443	4.67977	9.61511	9.58533	8.48229	7.10568	5.15651	9.73067	6.57796	6.69836	4.35565	6.61037	7.31272	4.06483	7.03691	6.56785	11.4645	5.42907	7.53071	3.73312	6.77561	5.78265	5.4859
VIT_13s0064g00370	Alpha-N-acetylglucosaminidase	8.58178	10.6931	8.69102	1.42951	1.89973	2.29577	0.800505	0.550869	0.819587	9.89274	11.4524	10.0128	1.47696	1.34543	1.36961	0.789347	0.59267	0.739682	9.60249	10.028	9.9872	2.0377	1.82216	2.56323	0.817691	0.636426	1.1294
VIT_06s0004g00720	Glucan endo-1,3-beta-glucosidase 4 precursor	8.65252	9.15106	7.05321	3.94602	3.83011	6.03472	2.31592	1.70976	2.19112	10.0675	8.12449	8.18468	3.90657	3.88644	4.71875	2.6472	2.36797	2.74885	8.04616	9.07136	7.00378	4.32681	3.94225	6.435	2.28283	2.33494	3.07761
VIT_17s0119g00120	Alpha-amylase/subtilisin inhibitor	8.67577	11.8577	5.5477	4.58123	9.02456	2.85367	0.808296	1.36562	1.35694	4.30736	6.64491	4.05895	3.02708	7.3574	2.50409	0.82862	1.26286	2.02255	16.5166	5.42142	4.96736	4.26661	6.80126	2.342	0.431714	1.49654	1.95319
VIT_17s0000g00120	Exostosin	8.69409	8.98261	8.26954	12.2565	13.123	13.7099	9.21731	7.81245	6.99027	12.8885	11.998	9.21232	12.2368	11.267	16.4503	9.33617	9.65902	8.57068	11.2295	11.0804	9.60007	10.6197	13.6888	12.9267	8.93697	8.88641	9.74579
VIT_02s0087g00430	Beta-amylase 8	8.70284	7.63585	11.654	8.44899	10.8579	8.77849	15.5921	13.9126	11.6182	7.96688	9.71204	12.253	10.1586	10.2481	9.50853	11.797	12.2663	10.4136	8.93308	10.4174	11.0605	10.261	11.3654	8.45739	14.9174	12.452	12.812
VIT_03s0038g00920	Carbohydrate kinase, PfkB	8.77594	8.35161	7.69488	5.36267	6.01483	5.99734	4.87941	4.75943	6.54162	9.10928	7.5736	8.8095	6.75365	5.34271	5.9371	4.88587	6.42538	5.81108	7.64655	7.33985	8.99718	5.75777	6.484	7.37392	5.20699	5.08625	5.53516
VIT_08s0007g08840	Glycosyl transferaseHGA1	8.81877	10.4032	9.07456	101.62	117.119	112.784	87.5942	175.843	108.523	4.05461	9.32228	3.74122	89.0746	120.331	143.965	68.4804	164.006	118.212	11.2373	11.603	4.59689	115.399	108.968	106.037	88.5494	152.282	142.971
VIT_14s0060g00810	Galactinol synthase	8.83383	5.72684	11.5935	42.7841	48.2713	46.0796	39.2095	29.0898	23.2658	6.48063	7.18037	4.87205	41.8959	53.1622	21.9763	28.4261	20.4511	18.1666	12.4624	14.0373	10.949	79.6628	63.1782	50.767	40.8093	13.1313	17.8626
VIT_19s0014g00300	Alpha,alpha-trehalose-phosphate synthase	8.87581	7.0097	14.8272	6.51682	5.31197	7.26474	3.65719	3.82023	3.43972	11.6822	9.05599	9.26881	5.54891	4.87221	5.74365	3.06696	3.28865	3.05391	8.03933	5.4301	12.7553	5.06354	5.4583	7.15449	2.95594	2.70679	3.41541
VIT_01s0010g03300	Protein processing in endoplasmic reticulum	8.88168	8.0023	10.1324	19.8526	17.9661	19.0466	38.4732	32.9847	30.3305	10.1398	8.49328	9.15346	20.7975	21.4571	19.3514	40.9615	35.3719	32.0298	9.22549	8.84054	10.107	18.9811	20.3367	18.8044	39.4802	36.9561	26.8857
VIT_04s0023g03650	Galactose mutarotase-like	8.89485	9.4158	10.3295	0.890195	1.02774	1.79557	0.0533194	0.063388	0.110142	11.1988	7.27618	9.83305	0.813292	0.958095	0.573521	0.0503265	0.0880806	0.160956	9.62389	8.29538	13.1018	1.18192	0.828565	1.80332	0.075407	0.082781	0.142389
VIT_02s0033g00240	Glucosyltransferase twi1	8.89746	7.28961	10.8168	9.17313	10.4987	9.50004	5.02455	3.74109	4.57647	7.85994	6.30437	8.96179	10.5997	9.33852	9.1914	6.99487	5.29652	6.29223	7.58813	8.86797	10.3441	10.1143	8.44824	10.2081	5.18361	4.58012	5.23173
VIT_04s0008g02830	Galactokinase like protein	8.97176	8.40526	7.8543	10.7756	10.9798	10.4545	15.3806	9.24278	11.2473	11.4783	7.55146	6.34847	10.9475	8.75875	11.9227	12.8297	10.5222	10.3957	9.94668	8.0814	7.79785	16.1691	9.72402	10.7294	15.417	10.5628	12.1943
VIT_16s0039g00320	Alcohol dehydrogenase 1	8.97928	8.8898	7.36475	5.42592	7.28433	6.17887	4.33919	4.70795	4.2801	9.12867	9.61119	9.59991	6.32545	8.33733	6.78385	4.60759	6.75189	5.2252	11.9287	9.24249	9.04803	7.26907	8.04305	6.26454	3.94573	7.78184	4.619
VIT_15s0021g01010	Phosphatidylinositol-4-phosphate 5-kinase	9.09583	11.1621	12.1828	13.5021	11.4806	12.638	11.1176	10.8636	11.1647	9.87645	10.6675	12.9834	13.3704	15.0716	12.6342	11.3718	11.7064	14.3524	9.51383	10.5794	13.2502	15.0817	11.8677	10.6439	11.561	10.9485	10.0839
VIT_08s0056g00080	Glycosyl transferase family 8 protein	9.12873	7.55138	10.573	21.3768	16.2076	20.5498	17.9854	15.2601	16.9833	9.37413	6.69679	8.54976	19.0634	19.9856	22.6197	19.2937	17.0126	19.4585	7.94212	6.3879	10.3865	19.719	15.9763	20.7045	17.011	12.5429	15.4195
VIT_10s0003g00250	Glucan phosphorylase	9.26804	8.6726	8.42619	2.90337	3.68164	3.95315	2.19777	2.80966	2.89078	9.39646	7.74646	8.71015	3.13479	3.88116	3.6158	2.63397	3.08921	3.94203	10.0105	8.56709	9.52544	3.89854	3.40083	4.44251	3.03226	2.78164	4.26851
VIT_00s0780g00020	Glucan endo-1,3-beta-glucosidase 5 precursor	9.28643	8.87621	7.5673	2.43669	1.78932	1.62765	0.251614	0.489812	0.842438	8.9397	9.11337	8.43387	2.07607	1.31136	1.67652	0.344334	0.582334	1.17253	9.84005	9.17234	8.99386	2.02565	1.4123	1.54561	0.23754	0.601429	1.00566
VIT_14s0066g02530	Fumarate reductase/succinate dehydrogenase flavoprotein	9.28908	9.04407	6.2689	1.71526	1.43659	2.5203	0.818635	1.45163	1.91116	11.1454	7.93994	6.49837	2.39072	2.38358	1.78301	0.814363	1.30754	1.45499	8.57817	8.93838	5.96146	2.2478	1.79785	2.16786	0.697447	0.8529	1.97467
VIT_16s0039g01700	Inositol 1,3,4-triphosphate 5/6 kinase	9.30336	11.3123	14.6888	13.5284	11.7865	16.9486	21.7301	15.8985	16.7718	8.85508	10.452	13.4983	13.2207	14.6805	17.0401	21.2006	14.8653	17.6567	7.97223	11.8946	12.9249	11.5267	13.3392	13.7783	20.7082	15.5219	15.516
VIT_19s0015g00500	1,4-alpha-D-glucan maltohydrolase	9.3224	9.67818	8.03641	9.20961	7.42126	8.25443	9.18027	11.1088	12.2331	10.6505	9.10703	7.75917	9.61168	9.16056	7.85	8.90245	9.31261	10.5789	8.15001	8.61882	7.6843	12.5503	8.54951	7.89216	9.69386	10.5639	10.4829
VIT_14s0066g00810	Raffinose synthase	9.35883	13.0299	3.24863	6.07077	13.0945	3.99245	2.21778	3.00373	3.42612	7.72624	12.8034	5.36952	6.02077	7.98678	2.34241	1.39274	2.83024	2.91566	12.6711	15.6897	4.62082	11.669	13.0568	3.43066	1.936	5.44748	3.13133
VIT_18s0001g12910	Inositol-pentakisphosphate 2-kinase 1 ATIPK1	9.39393	9.28959	9.5092	15.3814	13.1615	14.9132	14.3842	14.8194	13.4034	11.143	9.8461	9.85662	14.8223	13.6897	13.7542	15.1195	13.0399	13.6483	9.73199	9.07563	9.01203	15.6787	13.0578	15.1536	13.4921	11.3685	11.9423
VIT_00s0265g00050	1,3-beta-glucan synthase	9.42413	12.3716	11.0833	21.8279	20.4636	26.9601	18.7632	19.4412	19.038	11.4938	14.2517	14.3954	19.1069	22.3564	30.3335	20.2027	18.5531	19.8414	8.81148	14.0591	10.6287	19.8254	22.318	22.5412	21.1858	16.9336	21.7435
VIT_14s0068g01230	fructose-2,6-bisphosphatase	9.54669	6.88668	22.1542	9.63334	11.1328	10.5704	6.18342	5.5156	4.47835	6.12703	7.29704	17.8494	9.69109	9.49205	13.4729	7.80325	5.5856	4.31434	11.1896	7.02993	23.152	8.10039	12.6087	11.8708	7.1253	5.12293	6.24348
VIT_09s0002g02320	Cell wall apoplastic invertase (CWINV)	9.7006	5.04099	12.1246	4.14146	7.96412	2.99548	15.8391	5.32197	7.95844	7.23289	4.99467	9.70996	3.40954	10.2311	3.62103	14.9332	9.41129	12.955	8.85933	4.97832	12.8692	3.67498	7.95737	2.59295	13.5629	12.02	9.17734
VIT_08s0007g07430	Galactose-1-phosphate uridyl transferase	9.71374	7.16177	10.7209	18.9057	23.6405	16.6498	44.1651	42.0734	44.8496	8.205	7.49693	9.17631	19.6939	22.1548	17.3356	44.2834	47.6266	47.1633	10.3462	7.47965	11.9906	20.6939	22.0344	15.5275	43.7848	50.2939	33.9575
VIT_00s0340g00070	UDP-N-acetylglucosamine transferase subunit alg13	9.76054	8.50167	8.53589	13.9469	12.5036	12.8586	17.3252	13.8615	10.1212	10.3031	7.15317	8.20764	15.7413	13.698	13.3263	15.8077	12.0976	10.4065	10.1869	5.81839	8.31095	14.6081	12.8247	14.9149	16.6962	12.0763	9.5784
VIT_05s0062g00980	Aldo/keto reductase AKR	9.79414	13.0851	6.14292	35.9004	48.8791	27.0725	68.0204	78.794	80.3628	9.34354	19.2418	8.75064	30.4221	43.8615	31.4208	63.1436	72.5794	71.5159	14.8359	19.8757	6.98063	47.8	46.9487	32.1118	109.246	91.402	100.304
VIT_01s0011g00730	Alpha-1,4-glucan phosphorylase type H	9.86439	14.6309	4.70171	0.475393	0.311018	0.876773	0.159161	0.19618	0.67934	13.2167	14.7132	4.9164	0.601659	0.525863	0.903717	0.122247	0.276464	0.517873	9.97483	16.5703	4.64159	0.540142	0.396914	0.764625	0.178209	0.261212	0.683438
VIT_10s0003g04120	Galactosyltransferase	9.88285	9.0029	9.49955	12.1661	11.4969	8.96989	9.25764	7.1753	7.33336	12.28	9.44433	9.83772	12.1665	11.5047	10.0374	9.47876	8.71994	7.56631	8.36735	9.55769	10.592	12.1985	11.2398	10.2313	9.51266	8.20944	6.58084
VIT_00s0265g00010	Phosphoglycerate mutase	9.90619	11.4101	10.9263	4.49875	3.42747	7.26507	2.66173	2.89213	4.07901	12.8789	7.10672	6.99892	6.20726	3.80488	6.83909	2.92305	2.5105	3.61976	9.92338	8.63668	11.7047	4.49493	3.47634	7.74932	3.21649	2.28951	4.24112
VIT_04s0023g01220	Dolichyl-diphosphooligosaccharide-protein glycotransferase	10.1066	9.96239	7.31568	2.90065	3.35566	3.02612	1.73053	1.80374	2.31538	12.7434	9.66788	6.30122	3.2932	3.06524	4.7107	2.12731	3.15046	3.2837	12.1796	9.58259	7.50107	2.99867	2.95798	3.3489	1.79271	2.16161	2.88527
VIT_03s0017g00980	UDP-arabinose 4-epimerase 3	10.1292	11.0909	12.4653	20.5384	21.8636	18.8034	27.6296	22.2234	23.6907	10.7787	12.3179	12.0385	20.5502	18.8866	22.9105	30.1932	25.4031	26.58	13.3818	13.5174	13.5403	20.0157	23.0149	19.0397	27.4484	27.011	24.7139
VIT_12s0057g00990	Beta 1,2 N-acetylglucosaminyltransferase	10.1576	9.26499	9.92732	12.068	12.7848	9.75915	43.0189	30.7187	26.6371	9.23959	10.6681	10.4484	10.0992	10.0572	12.9899	42.5551	30.6178	28.2054	12.299	8.8217	10.7717	9.9049	11.6572	9.65434	45.0601	33.2789	28.3495
VIT_03s0088g00410	Pyruvate kinase isozyme A, chloroplast precursor	10.1589	9.16218	10.9171	7.9497	7.19792	8.44323	1.64474	1.61736	2.73493	9.53334	8.90637	9.80331	7.1621	6.76736	7.28924	1.92182	2.33173	2.75215	9.07569	9.74326	9.72505	7.17451	6.07757	7.28376	1.59125	1.75702	3.71019
VIT_19s0014g02650	Glycosyl transferase family 14 protein	10.175	6.41693	9.06004	34.9072	32.8194	17.2362	20.4341	31.0792	30.9053	6.84714	6.26001	7.35158	30.1495	32.7538	24.3924	19.4528	29.1113	32.2903	12.0628	5.59165	8.32002	37.2329	33.1501	16.509	20.6999	29.0825	29.7407
VIT_09s0070g00310	Glucan endo-1,3-beta-glucosidase 6 precursor	10.2456	11.1228	14.248	32.2392	22.6716	32.3994	33.7143	21.0178	25.1294	11.9994	11.9883	13.9739	28.6304	26.4111	35.8833	33.4084	23.1594	26.6811	8.95838	11.0162	13.5163	26.722	25.716	30.8128	31.9478	23.8313	25.1805
VIT_18s0001g12390	Glucan endo-1,3-beta-glucosidase 7 precursor	10.2892	9.58466	9.45789	37.0619	44.6463	21.2249	22.2801	16.6054	17.8849	11.627	10.9546	8.05349	42.5693	47.902	16.4135	21.1793	13.7041	19.7264	8.4489	9.82815	7.58213	49.0338	39.4714	19.638	22.8499	11.0149	16.6179
VIT_11s0016g00360	1-phosphatidylinositol-3-phosphate 5-kinase	10.3768	10.5732	18.4209	21.6939	18.7864	23.4282	34.9809	24.2508	21.3181	12.3223	9.25223	13.0338	21.3482	18.123	24.2123	32.7317	23.4877	19.8188	9.50625	9.69808	18.0815	19.8277	18.3347	24.1316	32.6573	24.6885	19.0418
VIT_19s0135g00060	Glyoxalase II	10.3863	16.1435	15.2598	3.77887	5.02948	3.58107	3.34413	3.69505	2.81963	12.5216	18.3523	19.3436	4.19247	4.80369	3.6777	3.72425	3.68081	3.08796	16.1552	16.8873	18.281	4.15837	3.48975	3.8288	4.36414	3.44496	3.6312
VIT_04s0023g02130	1,4-beta-mannan endohydrolase	10.4101	11.7616	18.4725	19.2096	19.1394	23.3291	11.7225	14.2937	18.9463	13.2659	8.86471	14.9134	23.2619	22.08	20.1936	15.7918	13.9304	19.595	8.41872	11.6536	16.9466	22.0907	19.9418	22.7441	13.1116	9.10588	20.5271
VIT_15s0045g01120	6-phosphofructokinase	10.4192	10.2067	9.88333	6.45871	5.13401	7.57386	1.82301	2.32952	3.6598	9.52035	9.43943	8.80961	6.34664	5.48394	6.88268	1.93209	3.00881	2.85464	10.7132	13.2485	8.37154	7.38937	7.64546	7.18806	1.88809	2.10355	4.92871
VIT_05s0062g01430	Glycosyl hydrolase family 17 protein	10.5935	8.35247	8.01831	2.21268	2.71434	1.91181	0.89786	0.949703	0.973103	8.08812	6.8162	7.34076	2.37159	2.81527	2.09728	1.25777	1.10546	1.32102	12.1272	7.33833	10.2212	2.23728	2.40911	1.987	0.990884	1.01319	1.52359
VIT_04s0023g02810	Aldehyde dehydrogenase 3B1	10.6743	14.593	17.2895	37.2895	28.8819	14.8847	7.05044	14.9904	41.6672	19.0141	17.9413	13.4177	40.9831	37.5741	14.5758	8.91213	25.6348	54.0679	13.1548	12.8113	20.7315	40.8171	24.5231	11.4421	7.16599	21.6931	27.98
VIT_18s0089g00410	Sucrose-phosphate synthase 1	10.7889	7.12755	30.2158	198.18	212.571	142.636	327.005	354.106	322.108	6.90346	5.61599	18.7001	137.241	152.431	158.187	293.227	276.365	269.652	6.67028	8.43418	21.144	168.2	135.335	116.62	305.49	233.381	305.498
VIT_14s0060g01700	fumarase	10.8153	12.2517	3.84205	2.56265	2.95605	2.93775	4.35442	6.44983	8.12009	12.2752	11.4902	5.30178	2.67096	2.74302	2.93334	5.11481	6.0307	8.65508	10.2696	12.0509	3.62031	3.12319	2.59451	2.7255	5.01689	5.79991	7.34646
VIT_12s0028g00630	Hydroxyacylglutathione hydrolase 3	10.9115	10.5457	11.0012	9.56944	9.45765	10.5009	9.71109	10.7132	10.3667	11.2453	10.3932	11.4846	10.7952	8.96205	10.3	10.4695	10.672	8.90089	9.27681	11.038	10.7304	9.44067	9.69	10.294	9.70173	9.03652	9.72394
VIT_14s0006g01790	Beta-mannosidase	11.024	13.1386	9.0625	11.5889	12.066	8.53827	14.6639	11.9749	11.8077	16.2999	13.8575	11.9247	14.083	16.4996	12.5999	19.3428	14.7775	16.3886	13.2686	11.9736	10.0001	14.1075	12.5903	9.87296	19.3376	12.2028	14.0816
VIT_05s0029g00680	Beta-D-galactosidase	11.0765	12.282	12.0903	9.15322	9.1522	9.08617	8.05226	6.88664	6.38347	11.9005	11.2881	9.86161	8.84317	8.38934	9.02489	7.83097	7.06403	6.03346	9.27481	14.0425	10.9814	9.19032	8.76416	9.61477	6.83378	5.34259	7.29746
VIT_02s0025g04210	UDP-glucose 4-epimerase	11.2139	7.82816	12.3339	19.7423	24.373	25.081	13.8933	9.55711	8.44315	9.84558	8.28893	9.81001	23.7951	18.8141	27.7372	11.1923	10.0848	9.01172	10.1402	5.39205	14.2608	39.3604	18.1037	28.2375	14.6389	5.56862	12.2746
VIT_16s0022g02080	Exostosin family protein	11.294	8.97521	13.711	12.1673	11.0726	10.5235	9.00747	11.9579	7.62166	10.9945	9.14764	14.1692	12.2264	15.3143	12.3131	10.8165	15.5949	10.4112	13.4235	8.16276	15.3163	9.83592	12.4988	9.64445	11.3176	14.3001	8.42952
VIT_14s0036g00420	Phosphoenolpyruvate carboxylase kinase	11.3402	12.3104	31.6825	23.7721	36.4382	21.0892	5.02854	14.6566	18.9428	15.2902	17.2942	12.4614	28.5921	35.9675	19.2699	6.96413	15.5899	16.5155	16.0543	11.9563	24.8761	25.9897	31.5216	23.6795	5.81386	17.4183	27.248
VIT_14s0060g01690	fumarase	11.4785	12.5102	4.71784	2.67761	2.0608	4.30257	5.48573	9.24328	8.84816	10.6416	13.5026	6.3308	2.83941	4.06424	2.67886	4.02936	7.42947	10.1691	12.4558	15.3404	3.43973	4.74642	3.04147	4.57332	7.95571	8.06904	7.43876
VIT_16s0013g02100	2-phosphoglycerate kinase	11.4939	13.728	12.0061	17.7749	16.5306	18.3776	12.1831	14.0826	12.7564	12.1162	14.188	11.8961	17.1077	17.122	17.7462	12.4147	12.2179	12.4462	10.9726	13.3024	10.9245	17.5722	17.3638	19.6044	13.051	11.9052	13.8519
VIT_07s0005g00130	Alpha-1,3-mannosyltransferase ALG3	11.4989	11.0937	10.4601	11.2921	12.1642	12.8971	18.3713	15.672	14.3205	10.9073	11.3545	11.7774	11.7302	11.8384	13.285	18.8264	15.1845	12.8131	11.8729	10.9348	11.3446	12.4745	13.0946	13.0376	17.614	15.2247	13.5469
VIT_00s0227g00190	Phosphoglucomutase/phosphomannomutase C terminal	11.5021	11.1187	13.8946	9.16078	9.75849	11.4797	12.133	8.08399	10.3326	11.5674	9.39986	11.8661	9.04849	7.50596	10.7274	10.1887	9.99345	9.45224	11.5322	11.2552	15.1906	8.12308	8.37471	9.66069	8.71259	7.59291	11.7336
VIT_18s0089g00590	Glyceraldehyde-3-phosphate dehydrogenase, cytosolic	11.8221	10.7911	12.5143	9.01452	10.4262	12.501	6.22778	7.92912	5.04051	10.6453	11.8816	11.262	9.30486	11.2822	16.4406	6.15048	7.72525	5.84727	13.1277	11.6118	11.2856	9.02693	10.3113	13.3068	6.01386	6.14578	7.2498
VIT_06s0004g04310	Alcohol dehydrogenase	11.8524	11.9022	10.6296	0.998243	1.27725	1.34603	0.0772207	0.135273	0.391322	11.4236	10.807	10.7159	1.64297	1.19922	1.71815	0.289439	0.0782672	0.33502	10.7218	14.5385	11.1595	1.91213	1.63911	2.01238	0.241344	0.139917	0.519032
VIT_15s0046g01620	Glycosyl transferase family 1 protein	11.9465	10.6834	13.073	14.5741	13.7256	16.8182	13.5697	13.7905	15.3287	12.2482	10.8756	13.0145	13.2889	13.8287	20.1346	13.8842	14.052	14.2157	11.626	10.5471	15.294	14.5738	15.0248	16.6943	13.6304	13.5915	15.2837
VIT_02s0012g01680	Trehalose phosphatase 5	12.0566	11.9596	16.3208	26.9752	26.774	29.7049	35.8121	23.3152	23.3265	15.362	15.2282	17.0935	23.9923	27.3728	39.5365	35.5408	27.2376	23.207	10.9607	13.6811	15.2937	22.9051	25.128	27.6957	30.08	24.5095	24.2808
VIT_18s0001g03290	1-phosphatidylinositol-4-phosphate 5-kinase	12.1909	12.5681	12.4425	41.6802	45.9097	38.6232	84.829	47.7319	49.3087	10.847	9.9471	12.411	37.1596	43.632	37.6003	81.4075	43.0284	42.2833	10.5475	12.4768	14.4198	34.11	49.5262	41.661	91.9044	43.1185	46.5618
VIT_00s0475g00010	Glycosyl transferase family 8 protein	12.2162	10.893	17.977	12.6247	9.9812	14.4016	5.43758	7.57596	6.03617	11.7055	9.13659	13.3175	12.0334	11.811	14.4962	6.3592	7.96506	6.99761	11.293	9.51045	16.3745	9.93315	9.25778	14.8743	5.28905	7.88366	6.3359
VIT_08s0007g06000	Glucan endo-1,3-beta-glucosidase GII precursor	12.2529	12.2484	16.9739	12.9653	24.9969	13.0466	4.74958	5.39169	5.3564	12.8741	14.0493	15.6316	15.3154	18.3719	20.266	5.35731	5.49789	5.34072	14.7023	12.9347	21.0333	20.2393	21.7654	14.7062	5.52018	3.90701	7.68818
VIT_04s0044g01210	Phosphatidylinositol 4-kinase	12.3018	12.6108	15.3219	19.4834	17.7731	19.5725	18.8526	18.2873	19.6336	12.5936	13.1266	14.5492	18.7662	20.4611	21.0939	18.4027	17.7948	18.1759	13.4752	11.1466	15.4392	20.6045	18.3076	17.9466	18.489	18.4026	17.7525
VIT_04s0008g03430	Exostosin family	12.339	11.5213	18.2427	20.1679	19.8586	17.2188	19.7669	19.4235	16.4182	11.6547	12.3609	16.9353	18.0322	21.4993	20.2027	20.6737	20.5088	20.3399	14.092	10.464	20.0106	19.591	20.1557	17.9814	21.0004	21.1315	15.8983
VIT_00s0179g00350	Pyruvate kinase isozyme A, chloroplast precursor	12.4702	9.84702	10.1722	6.12003	6.76412	7.70232	3.1619	3.93659	4.24973	8.21384	9.04258	11.5235	6.47002	7.42122	6.83752	2.72086	3.04545	4.6536	18.2823	8.77273	10.5536	6.28159	6.83103	6.45932	4.06605	3.01001	5.80386
VIT_15s0046g01080	Glycosyl hydrolase family 18	12.4855	13.6794	10.7205	10.3852	10.3468	10.0809	6.11758	7.65127	7.61824	14.1418	13.1857	12.127	10.6776	9.5069	8.48239	6.54137	6.71806	7.38275	12.7996	15.7939	11.3456	11.6583	11.0414	10.1867	5.478	6.44714	8.21675
VIT_05s0020g00400	Galactosyltransferase family protein	12.5377	12.117	13.6296	4.68825	4.67677	6.85274	2.15628	2.30308	3.11185	11.8491	11.3907	13.5046	5.2895	4.61342	4.6215	2.23846	2.42189	3.18582	11.7268	12.2217	14.4565	5.35038	4.87439	6.66508	2.07194	2.39441	3.10781
VIT_14s0081g00460	SAC domain phosphoinositide (3,5)P2 phosphatase	12.6771	12.5586	13.2319	19.9968	19.2216	20.7706	27.1644	23.1528	24.3288	12.6048	12.9124	13.4323	18.3934	19.5308	20.3742	26.221	22.6686	21.705	12.3579	11.7102	13.2916	19.7084	19.5485	19.3492	25.7017	24.3697	23.1196
VIT_17s0000g07240	Activating signal cointegrator 1 complex subunit 3	12.6775	12.5797	13.7288	10.7088	9.62658	11.1718	12.4537	13.4151	14.6014	14.7989	14.1316	14.2598	10.4106	11.9295	10.4916	11.2424	14.1709	12.335	12.4182	12.1938	13.1544	12.5805	10.3568	10.8794	12.843	14.0996	11.0168
VIT_02s0025g01240	UDP-glucuronosyl/UDP-glucosyltransferase	12.6883	12.2156	28.8429	4.12114	4.76805	3.48902	0.227124	1.1562	0.581809	10.0638	13.6019	9.6817	3.67648	4.02964	2.87898	0.301236	1.20803	1.04868	19.4859	20.0342	19.9928	3.09211	3.18501	4.31962	0.167201	0.938911	1.68023
VIT_11s0016g02420	UDP-N-acetylglucosamine O-acyltransferase protein	12.6902	9.27063	11.6871	7.29041	6.71593	6.26156	6.67618	6.27574	6.95948	11.3305	7.1186	11.8905	7.29225	6.64517	5.95624	6.50552	5.29029	7.47805	12.1023	8.71038	10.566	7.05192	6.38837	7.22793	6.28569	4.55679	6.66041
VIT_06s0004g05660	Glycosyl transferase family 1 protein	12.7766	14.6119	33.1429	15.6394	32.5205	21.4098	2.05726	1.73188	5.98121	8.58635	19.4477	13.8657	17.236	31.3517	15.3795	2.08563	1.52565	6.84799	14.9576	7.21753	32.5848	44.7315	23.4893	21.2742	3.27928	1.26938	8.47229
VIT_14s0060g00860	Beta-fructofuranosidase	12.8322	14.948	14.3782	28.7432	31.8575	19.9548	33.0035	23.0644	27.2886	13.7792	14.727	12.2828	33.6574	34.8238	23.2961	34.303	25.61	24.175	12.3841	12.7599	15.1257	36.9121	32.2731	17.1624	35.9477	28.1684	22.7527
VIT_06s0004g06920	fructose-6-phosphate-2-kinase	12.8677	17.998	17.0287	14.105	14.8947	16.3125	14.604	13.6964	9.47235	15.9936	17.3571	16.5297	16.5657	15.3032	13.5296	14.1461	11.8615	10.4558	14.4809	19.6931	18.4088	19.094	16.0754	15.5974	14.9511	10.8677	11.4288
VIT_02s0012g01640	Inositol 1,3,4-trisphosphate 5/6-kinase.	12.9297	11.8523	19.826	11.3384	11.7584	12.4409	11.561	13.9468	8.68787	11.7083	9.72808	12.6606	10.9944	10.6215	13.3113	11.4914	12.5613	9.6523	13.2129	8.44991	18.1386	10.3751	11.682	14.1352	13.0115	16.3665	13.3024
VIT_13s0019g01230	Dolichyl-phosphate beta-glucosyltransferase	12.9419	13.2184	15.4202	14.8403	16.3622	19.4209	28.0516	21.9246	20.4715	13.537	12.5095	14.2712	16.1497	15.9823	20.4906	29.2565	22.4052	18.8676	14.1949	12.5543	14.8757	15.719	18.2109	21.0804	28.7202	26.3474	21.667
VIT_17s0000g10240	Isocitrate dehydrogenase [NADP]	12.9846	12.7903	13.8721	12.1172	10.6575	13.9585	8.34287	11.1174	11.0084	13.0751	10.9275	14.955	10.995	12.3909	10.7599	7.91106	9.84994	10.1763	11.16	9.46587	13.956	12.3844	10.4297	12.8382	7.57483	9.91932	10.113
VIT_03s0038g00370	fructose-1,6-bisphosphatase, chloroplast precursor	12.9866	12.8937	11.5259	7.2477	4.71764	8.07432	5.84765	3.46347	3.90254	13.7641	12.3399	11.1343	6.47979	5.11382	7.63141	5.71585	4.46844	4.07419	12.481	13.464	12.2889	5.94338	4.32405	8.11633	4.95734	3.38156	4.49462
VIT_17s0000g05410	Galactosyltransferase	12.9879	13.737	10.6006	5.9458	7.22502	6.98581	4.23696	5.16576	4.24274	12.0835	13.2137	8.38477	5.47877	6.9221	8.43076	4.17396	5.50719	5.13749	12.6365	14.4499	9.01337	5.67451	6.48198	7.14105	3.889	6.10673	4.71267
VIT_13s0019g05160	Pullulanase	13.0003	14.3432	8.09887	6.02026	6.43806	6.90198	4.12337	5.0578	4.44739	12.0009	16.1525	11.4957	6.75331	6.43932	7.50601	3.82729	4.44153	3.58207	11.6473	18.6005	11.6379	6.08517	7.17978	8.46391	4.49605	3.71763	5.23319
VIT_06s0080g00030	Aldo/keto reductase	13.0211	11.6131	14.704	18.3297	12.9746	16.3076	17.9647	14.2804	15.7174	14.2104	10.525	12.0561	20.8544	14.6478	14.485	16.649	16.713	12.343	15.3989	9.61818	14.9401	15.578	14.3104	12.4525	14.6097	12.9482	13.1659
VIT_16s0022g00660	Trehalose-6-phosphate phosphatase	13.2557	10.0508	13.6832	27.605	30.7249	24.9004	7.05819	15.4805	6.71225	5.92452	8.79995	5.60564	27.0933	30.3391	28.8656	9.15315	11.8716	8.1642	11.6474	9.19909	11.8662	28.5301	39.8147	37.4103	9.69648	11.013	10.3574
VIT_00s0921g00020	Alpha-1,3-mannosyl-glycoprotein beta-1,2-N-acetylglucosaminyltransferase	13.3106	16.3094	11.5126	15.697	17.0081	14.5623	10.0047	12.7696	12.1208	16.3201	17.9076	16.665	10.598	15.573	11.2516	11.5736	13.348	13.4646	13.2225	13.4468	12.777	16.8765	12.7611	13.0428	11.8957	13.0458	11.5203
VIT_13s0019g04500	Transketolase	13.3554	11.1059	14.9775	6.62679	8.52138	5.67927	6.12369	6.10874	7.33264	12.1541	12.9839	14.9041	7.55621	9.78229	7.23536	6.67572	8.0863	8.48982	15.6941	12.7976	16.0147	8.85218	8.35726	6.73008	7.83926	9.05249	7.37066
VIT_14s0066g02350	Galactinol synthase	13.3681	86.4668	14.9061	7.7734	8.49861	30.8537	4.38002	24.1003	9.24742	6.2779	103.848	12.3802	6.37652	13.0208	22.2274	2.15087	22.5806	16.8255	27.4461	132.668	12.5175	8.05082	13.8781	25.0826	3.49239	31.2696	21.6557
VIT_12s0059g02150	Aconitate hydratase, cytoplasmic	13.3817	13.0333	9.69619	6.03221	6.69304	5.18361	4.2226	2.77742	4.04368	8.97241	8.91569	9.63501	6.83353	8.04886	9.18744	5.46619	5.34384	6.23444	12.3186	9.61859	8.82632	7.35106	7.91162	5.57792	5.41289	5.48669	5.00542
VIT_16s0100g01210	6-phospho 3-hexuloisomerase	13.447	12.6636	10.5607	2.80001	4.75795	2.7051	0.967396	2.7163	3.02956	14.5124	15.5693	13.8677	3.70355	4.58562	3.01959	1.94103	2.31918	3.55067	15.3163	18.5655	10.7282	4.52207	4.36911	2.71939	1.85409	2.77238	3.61588
VIT_03s0038g04370	Inositol-1-monophosphatase	13.4836	13.0496	18.261	15.1715	14.4953	17.1081	16.2112	13.2303	18.5023	14.4337	12.7114	18.5316	16.479	15.3623	17.6546	16.8953	15.1109	19.5884	13.8876	13.4415	19.1828	15.9119	13.6734	16.7474	12.9085	14.8873	14.839
VIT_00s0220g00170	Inositol polyphosphate 5-phosphatase, type II	13.5812	14.0691	17.3563	12.144	16.1007	14.2483	14.9768	14.2326	13.4447	12.1021	14.3256	18.0769	13.303	14.6732	13.5244	12.6947	12.5553	14.5317	12.3661	17.2269	15.2102	12.6941	13.6367	11.5963	13.2518	11.9853	13.1395
VIT_05s0020g02310	Pyruvate,orthophosphate dikinase	13.594	16.0861	17.2224	12.4154	12.6827	16.8407	7.29891	9.41636	10.5113	15.4894	14.6637	14.6363	12.4235	11.1818	14.9376	6.74152	10.3206	9.72215	11.3297	19.0918	13.3641	15.2804	12.3332	14.3307	7.0496	9.34711	10.7211
VIT_13s0067g01320	Alpha-1,2-mannosyltransferase	13.7645	11.913	14.225	16.5144	15.6205	15.298	27.4009	28.7048	28.7551	12.9504	11.9139	14.5045	18.3825	17.9102	16.3031	26.9429	27.7676	30.5861	12.0052	10.033	14.4081	17.4361	17.6961	14.8783	29.4814	27.2593	27.3982
VIT_03s0038g03750	Glycosyl transferase family 8 protein	13.7905	14.9321	11.8379	15.1322	14.825	13.8165	22.4792	21.6039	23.5782	14.3572	17.6175	12.2114	15.0423	17.211	16.1891	24.158	24.4931	23.7675	15.0937	14.2207	12.8926	18.063	16.7155	15.0018	23.5831	26.0658	19.9751
VIT_01s0010g03400	Exostosin	13.8912	13.1942	12.0118	20.6333	19.2713	20.3862	21.2516	13.5463	14.5621	14.6509	9.53312	13.2236	20.8353	20.5157	24.8229	21.8447	13.3849	15.4228	11.3079	13.0815	13.6988	20.0682	20.4505	20.4956	22.7902	12.3368	13.2558
VIT_11s0016g01870	Dihydrolipoamide S-acetyltransferase	13.9038	12.7477	10.2837	12.2077	15.0167	14.0697	11.2186	9.81878	9.2062	14.4483	13.106	11.1833	14.2424	15.9299	14.777	12.0281	10.1814	10.5895	16.6623	12.2171	10.9193	14.2682	15.7338	14.4384	12.299	10.1262	9.57944
VIT_14s0066g02400	Mannose-1-phosphate guanyltransferase	13.91	12.8251	13.1861	17.551	19.2738	18.6759	23.3483	25.9184	25.072	14.1873	14.5152	12.9713	19.4282	16.9695	20.436	23.9016	25.4139	22.7273	15.1256	14.5745	12.8262	18.8961	21.0887	19.5307	21.7839	25.8669	22.838
VIT_17s0000g04510	Acetyl-CoA synthetase	13.9663	13.9666	14.3595	11.204	11.059	12.7816	10.7513	10.172	10.6378	13.7364	14.2096	13.0993	10.4441	9.59764	11.0752	10.1839	9.4148	10.0124	12.6308	15.3549	12.7566	10.6087	10.8649	11.5455	10.4688	9.50895	11.4538
VIT_13s0019g00240	Glycosyltransferase family 14 Beta-1-3-galactosyl-O-glycosyl-glycoprotein	13.9828	13.0653	13.7643	3.08519	3.16923	4.24089	0.550577	0.685117	0.805229	13.3216	11.0663	14.8516	3.03426	2.61849	2.80481	0.297477	0.772148	0.860014	13.1305	13.1976	15.4909	2.70587	2.72889	5.16584	0.38831	0.45885	1.44473
VIT_07s0205g00110	Glycogen synthase 2	14.0049	12.4777	12.9113	7.92102	6.9372	9.60947	7.768	8.74703	9.3644	13.9279	11.4023	11.696	8.08029	7.74011	7.61608	7.40211	7.85359	8.70486	11.4045	11.5972	11.7139	8.32198	7.74909	9.9067	7.75964	7.58022	7.87643
VIT_18s0072g01000	Dihydrolipoamide S-acetyltransferase	14.0413	13.7712	14.2633	14.2658	16.9633	18.0145	9.78285	10.6062	11.6044	17.151	16.1384	16.2632	16.4288	15.3517	15.6628	9.40374	10.7083	11.2069	15.4401	11.6164	17.0112	15.0045	15.3324	16.2654	10.4222	8.038	13.1325
VIT_17s0000g00660	Phosphoglycerate mutase	14.0709	12.5249	12.9862	18.7247	19.4628	19.6715	34.3742	28.5359	26.1027	13.7913	14.4381	12.959	19.9303	18.635	18.0838	35.4519	29.7657	25.5898	13.3906	12.9714	13.0394	18.2708	19.2836	18.5467	34.3449	27.9458	25.9522
VIT_03s0038g04570	ADP-glucose pyrophosphorylase large subunit 1	14.1173	10.9554	26.429	2.13017	1.57821	2.25289	2.87747	1.89951	2.99267	13.2751	6.21875	19.2517	3.19278	3.15282	3.25265	3.81577	3.18922	3.89221	10.9382	5.87768	24.8428	2.61487	2.29801	2.51029	2.93159	3.16859	2.34901
VIT_14s0060g00440	Glucan endo-1,3-beta-glucosidase-related	14.2216	15.5217	8.51798	13.1441	17.3231	13.1417	3.23196	3.48294	3.82581	15.02	14.6815	10.0961	8.73211	10.8262	8.7729	2.19953	3.24602	3.46411	14.6869	15.7431	11.8782	17.3573	13.052	14.8104	2.98396	3.73482	2.55417
VIT_06s0061g00040	Hexokinase 6	14.2749	14.149	18.4306	7.42486	9.82748	7.92629	10.0031	19.2374	16.8136	14.2379	17.0806	18.0541	6.39455	10.2304	7.29458	9.46931	13.0676	16.3962	18.4974	15.1287	14.7441	7.74577	8.50224	8.08851	11.5301	18.424	16.4306
VIT_06s0061g01520	Beta-fructofuranosidase	14.2852	15.7357	16.9626	17.9777	15.0359	16.9023	23.8651	27.6604	29.7832	14.4749	15.1049	15.665	15.628	13.9355	19.8172	22.8744	26.4031	25.5324	11.2905	15.6397	15.6141	16.5074	15.7568	16.4177	22.9764	28.1579	25.5997
VIT_18s0001g03820	Phosphatidylinositol-4-phosphate 5-kinase 1	14.3975	15.3541	29.6189	31.7063	31.7233	35.3942	39.4885	25.1813	23.1315	13.9456	11.1657	18.6689	30.9087	31.7903	41.153	38.1833	26.3008	23.8195	12.5214	14.3048	28.8202	28.2431	29.3549	34.398	35.8378	24.5719	24.45
VIT_16s0013g01140	Phosphofructokinase	14.4423	14.3042	11.7377	19.0943	18.0071	18.3535	16.1183	18.4035	16.4903	14.5147	12.753	13.0127	18.6386	21.5523	18.2792	15.9744	16.9966	16.42	14.6794	15.7404	12.0873	19.2854	17.9023	18.6036	17.2274	15.5077	15.5368
VIT_12s0059g02000	Glycosyl transferase family 14 protein	14.4878	15.1208	20.2485	17.1241	16.7803	18.1868	21.1679	18.4845	16.7448	15.0289	14.5249	19.8853	16.5028	16.825	18.2128	21.6833	17.0666	15.4095	15.1006	13.3318	21.3481	17.4073	17.2424	19.2227	22.3586	16.0446	17.4066
VIT_05s0077g01150	Beta-1,3-glucanase	14.5512	12.9551	14.1098	7.97455	20.2632	3.03307	1.13997	1.88686	6.72586	5.90559	17.2988	24.1142	12.5738	14.345	2.37248	2.13975	4.64431	14.0538	38.2359	10.2976	21.2825	25.8319	30.1677	3.25787	6.77234	7.94154	11.5257
VIT_14s0036g00430	Glycogenin glucosyltransferase (glycogenin)	14.554	11.9824	18.7918	24.8668	22.7466	26.2254	46.548	33.2265	29.647	14.1292	12.3804	18.4092	23.3126	22.3824	28.2865	44.3613	33.5083	27.6965	14.5537	11.3713	18.7967	23.6695	24.2082	24.5478	47.6973	35.808	27.3117
VIT_06s0004g04320	Alcohol dehydrogenase 3	14.6546	14.7989	15.6971	3.1768	2.91937	3.35132	0.306407	0.455603	0.690325	14.7188	13.2167	16.1281	3.46031	2.52373	2.70677	0.340996	0.552868	0.64552	14.2561	14.0768	17.5708	4.99885	3.12042	4.70574	0.450485	0.38723	0.991014
VIT_08s0007g06040	Beta-1,3-glucanase	14.6576	63.1781	12.4343	898.623	3576.07	829.42	420.673	1028.47	539.799	33.6246	47.6617	15.4265	1963.11	2656.74	849.001	611.361	971.087	789.583	26.1597	61.9012	29.3112	3279.11	2417.95	804.568	818.153	643.358	886.94
VIT_14s0006g03000	Dolichyl pyrophosphate Man9GlcNAc2 alpha-1,3-glucosyltransferase	14.7557	14.7966	12.7034	20.9677	18.8304	21.1056	24.9726	23.7237	28.8178	16.4972	16.4219	14.8903	17.8331	18.24	18.5477	22.828	23.8439	26.4497	15.788	15.3363	13.3204	23.4908	19.0859	19.0116	23.9414	26.2326	25.4295
VIT_03s0038g03400	Endochitinase 1, basic	14.7687	10.5914	17.8575	1.24781	3.38172	0.760047	0.756697	0.771829	3.40142	9.60215	15.5245	17.9319	2.83899	2.04601	0.660849	1.53567	2.41848	2.11632	30.3282	10.4982	20.6677	3.06628	4.563	1.0248	2.30114	2.72159	3.73425
VIT_01s0011g03380	Dihydrolipoamide S-acetyltransferase (LTA2)	14.854	10.7167	21.1555	18.2881	27.9024	18.8117	39.1425	34.3032	30.5	12.7729	12.2865	22.0348	22.8316	18.0654	21.1879	37.2745	34.6106	22.2509	18.6778	10.3408	21.0899	15.813	26.4886	19.2583	36.1799	36.239	30.4843
VIT_19s0014g00560	Exostosin	14.9	13.3345	15.0588	14.5297	14.2217	14.7648	10.9613	9.67293	10.3529	12.2176	12.2285	14.625	15.2713	15.3333	14.6466	11.5114	8.32933	11.268	14.0189	13.5651	15.8279	16.1421	15.1066	14.7144	11.1119	8.83127	11.2325
VIT_10s0003g03280	Alpha-mannosidase	14.9254	12.8978	14.783	25.0095	24.1631	24.9598	34.4401	25.7901	22.8212	12.8431	13.5887	17.0748	23.3611	22.4042	29.6094	34.7878	24.0357	22.924	15.7926	11.9008	17.2923	23.0602	27.5402	26.6764	33.5405	25.1363	24.8266
VIT_08s0032g00420	Exostosin	15.0583	12.809	12.7806	8.69328	8.75324	7.668	6.16398	6.29787	6.23632	13.7252	16.1526	14.8381	8.35711	8.11836	7.6969	6.71889	6.63193	6.69321	15.5212	10.6303	13.3346	8.80168	9.65563	9.11893	6.93974	5.40396	5.34043
VIT_03s0038g03640	Phosphoglycerate mutase	15.0831	13.7195	16.1017	16.4008	18.4488	18.2601	5.7527	10.7354	11.4903	17.1949	11.703	17.404	17.1789	12.8775	14.1613	7.63132	8.70304	9.32076	13.7363	13.9588	16.2237	18.1347	17.034	17.439	6.52694	6.49858	12.4421
VIT_10s0071g01100	Alpha-galactosidase precursor	15.1933	14.0943	13.434	1.84852	3.27421	3.6935	1.58906	1.42275	1.69455	18.6375	11.043	13.7323	3.19861	3.70981	3.77229	1.48071	1.95536	2.67823	15.2918	13.1822	15.2679	4.24713	3.09273	3.50421	1.51871	2.40533	1.61036
VIT_19s0085g00720	3-deoxy-8-phosphooctulonate synthase.	15.2054	13.2283	14.4571	18.9544	16.3758	22.1773	13.6557	11.5934	10.6807	14.9267	11.0479	14.6354	18.9491	18.7859	18.7429	15.8134	11.0182	10.2407	14.691	12.0714	15.7545	19.5684	17.2679	21.5341	13.2534	9.73422	9.70817
VIT_08s0007g05920	UDP-GlcNAc:dolichyl-phosphate GlcNAc-1-phosphate transferase	15.2404	15.1314	14.4988	24.2622	23.6927	19.2673	45.3416	42.701	45.7837	17.023	15.8108	18.5205	25.5421	23.575	19.2628	45.1474	46.5184	43.5208	16.314	14.4357	15.0169	26.7188	22.4899	21.8105	47.9739	48.2438	36.7939
VIT_18s0086g00690	Exostosin	15.3108	17.8746	12.7979	14.9891	15.1563	13.4713	10.4678	9.54902	9.22805	15.4558	16.4465	15.9296	15.6581	17.1482	12.0765	9.8354	9.22499	10.0908	13.9514	19.9299	14.0512	16.9683	14.9715	13.0016	10.0307	7.27934	8.77809
VIT_19s0014g01490	Galactosyltransferase family protein	15.3704	12.8041	13.2258	15.1264	15.0829	14.1864	28.0444	22.8798	18.278	12.9829	13.6467	15.1773	15.0317	13.1966	15.1676	27.8235	22.7126	14.2736	15.2246	12.252	14.46	14.4679	16.0925	16.7536	25.5478	22.6209	18.5313
VIT_00s0585g00030	BETA-1,2-N-acetylglucosaminyltransferase I	15.545	15.2198	12.2597	13.8342	12.3849	15.0256	10.7654	13.011	14.1845	16.232	16.0909	14.2916	15.2236	17.446	13.5997	12.0128	12.928	16.4538	14.5191	15.5861	13.6718	17.5336	13.347	14.9613	11.3355	11.9695	11.6312
VIT_06s0009g00680	Pyridine nucleotide-disulphide oxidoreductase	15.5495	16.1948	15.5661	22.8545	25.3365	23.6803	8.06071	14.4526	8.98558	11.7918	13.1547	10.4739	20.0022	26.267	21.6522	9.15021	14.6199	10.877	19.4509	15.4218	17.516	24.3924	24.0825	24.3277	8.77653	14.5122	11.4105
VIT_03s0038g01480	Beta-fructofuranosidase	15.5928	14.2341	17.1652	20.5173	21.8653	19.3756	17.4805	23.907	26.3582	15.2063	16.0416	17.4683	17.2022	20.5512	20.8331	14.5055	22.3101	22.6276	14.9895	12.7841	15.8974	18.8196	22.268	20.4397	18.0817	25.4959	23.4797
VIT_10s0042g00950	Succinyl-CoA ligase alpha 1 subunit	15.6748	14.2338	15.9511	18.3063	19.9089	17.9749	8.24771	10.7744	13.9249	15.2852	13.6747	17.2174	19.5894	20.3791	17.5476	9.1647	9.99144	15.5702	15.5267	14.5366	17.6183	19.1567	19.7012	16.2993	8.20513	10.5815	13.8905
VIT_18s0001g15580	Glycogenin glucosyltransferase (glycogenin)	15.6955	15.0175	14.445	15.3109	14.9544	14.3721	12.7612	11.2624	10.084	14.2984	14.0365	15.4036	12.6137	12.0464	13.9759	12.1062	10.8013	10.2312	15.5993	15.3169	15.565	13.7811	15.0564	14.531	12.3549	10.1168	11.1062
VIT_05s0020g02950	Deoxyribose-phosphate aldolase 2	15.7309	14.3545	15.4116	17.8838	14.8057	20.0314	22.933	20.974	21.5132	14.52	14.2005	16.2409	15.9999	16.655	17.6841	23.311	19.2353	24.6148	15.2147	14.5423	14.989	17.0136	14.9481	20.2608	22.4217	18.2364	18.9862
VIT_05s0094g00930	Phosphoglucomutase/phosphomannomutase C terminal	15.8363	11.7211	20.6483	3.31251	2.8275	4.00259	0.496117	0.492472	0.770049	11.5958	9.02827	16.7317	3.6523	2.84714	2.60385	0.446111	0.67472	0.739417	12.9996	11.2011	18.0054	3.41946	2.63258	3.98068	0.41168	0.767103	0.732053
VIT_10s0003g02880	Starch synthase protein	15.9302	15.9798	19.594	21.4603	20.6497	25.6285	28.8392	27.6197	26.0982	14.8722	16.5103	16.9117	19.0845	20.6497	24.7002	27.6362	24.5534	24.4876	14.4555	14.4887	18.4317	23.6495	20.4869	24.4828	28.5523	24.65	24.5868
VIT_11s0149g00270	Chitinase-3 protein 1 precursor	15.944	14.1023	17.1595	24.5083	19.5199	24.7823	14.8658	16.5015	15.815	16.8763	14.8112	17.8377	22.137	19.6212	23.1695	14.512	14.2303	15.7608	12.8473	14.4964	15.2902	22.3475	16.5168	18.1235	16.0342	11.0752	16.6277
VIT_11s0016g03370	Exostosin-like	15.9773	14.8069	12.4098	4.08244	2.9095	4.63161	4.25362	3.24978	4.2161	16.9485	12.6359	12.5181	3.62236	3.14177	3.00247	3.54432	2.70289	3.74467	12.2778	11.6912	12.782	4.31811	2.87955	4.62421	3.70355	3.17609	3.46187
VIT_01s0026g00980	Glycosyl transferase family 8 protein	16.1014	20.3237	18.7928	36.8409	47.0847	81.5407	12.5283	47.777	19.9905	7.82389	19.5387	10.8093	36.9025	39.3292	94.6441	10.9519	58.6555	25.9626	22.952	25.0444	16.7741	28.3185	44.2567	86.6402	9.83718	48.0024	47.5758
VIT_16s0022g02340	fructokinase-2	16.2608	14.3167	14.7086	19.4303	23.9597	21.6578	24.7681	26.8085	28.907	15.3476	19.401	18.5755	18.1753	22.1533	23.2594	22.9697	26.1612	26.3623	18.9392	15.2649	15.8378	22.8885	26.7056	19.6747	27.5656	33.6204	26.6558
VIT_07s0205g00090	Glycogen synthase 2	16.2779	17.2281	16.5385	9.75151	8.59976	11.9182	8.89106	11.1305	9.66825	17.7448	15.1829	13.5934	7.9726	11.2281	9.13038	7.08627	8.6294	11.469	14.5039	13.762	14.7132	10.7067	7.63805	11.6432	7.87885	9.01669	8.65148
VIT_04s0023g00860	Short-chain dehydrogenase/reductase	16.3679	14.7049	15.5272	29.6534	30.1865	31.8046	42.5014	41.1961	38.0396	17.8367	13.5538	15.4923	31.5154	29.7561	29.1409	41.3446	37.3798	34.0811	16.8044	15.6515	15.5847	27.045	32.2653	31.8002	43.4307	34.746	35.8026
VIT_05s0094g01410	Inositol 1,3,4-trisphosphate 5/6-kinase	16.6198	15.4284	16.416	9.89058	10.6553	10.5354	8.1633	8.9338	11.0683	15.411	15.4244	15.7091	10.51	10.0302	9.58598	7.8056	9.56758	11.074	17.3539	13.1553	15.7136	12.7878	10.2345	10.9593	7.38163	9.93668	10.2823
VIT_05s0094g00850	Phosphoinositide phosphatase	16.649	17.2225	17.476	20.5739	18.9275	21.3715	29.0774	26.8403	27.1697	16.7306	18.3301	18.0234	19.0767	19.7759	23.0118	28.7935	27.6381	24.9726	17.2967	17.8763	18.0104	19.7031	20.0101	20.6785	29.1527	30.0673	24.1082
VIT_11s0016g05010	Lactoylglutathione lyase	16.6656	14.3858	26.8525	22.1192	21.071	26.0726	8.64555	8.25903	7.24581	13.97	11.4661	21.4972	27.3005	15.9688	31.9347	10.5647	9.9755	6.30655	14.039	13.9069	22.4044	17.4432	25.1218	27.6698	8.37152	6.59466	12.3999
VIT_07s0031g01540	4-alpha-glucanotransferase	16.8333	25.9824	11.0318	7.74237	8.58755	7.35382	9.79903	5.8836	4.19186	21.1382	29.247	13.6043	8.31126	8.36808	7.58733	9.90742	4.71095	3.05012	13.486	30.4664	10.9482	9.24185	8.37568	8.15987	10.0805	4.12756	4.3521
VIT_07s0005g03570	Arabinose-5-phosphate isomerase	16.8754	11.5375	25.7021	15.136	18.3529	13.2025	2.8356	3.45558	3.88261	12.9853	9.17618	23.0616	15.593	19.3991	18.3259	2.78232	4.03741	5.96529	21.9343	10.209	28.2138	17.0389	17.3426	13.8032	2.7283	3.8599	4.9904
VIT_14s0066g02390	Golgi alpha-mannosidase II	16.9185	18.5835	22.3945	31.9745	30.7632	29.0162	35.8721	30.3823	30.7654	19.2175	21.8116	23.9317	28.821	29.7808	29.5034	37.3693	33.2136	30.5335	17.656	19.2213	24.1086	30.1294	30.4889	28.0564	37.4679	32.3285	26.985
VIT_06s0080g00350	Myo-inositol-1-phosphate synthase	17.0359	16.8713	20.4778	15.3699	14.0604	16.1834	10.706	10.1152	10.5528	17.9404	18.7652	19.8172	15.4647	16.3548	14.4043	11.1916	9.69673	10.3484	19.0376	16.8985	20.0539	17.0624	14.8052	16.282	10.6939	9.92143	9.98158
VIT_14s0066g02440	Glycosyl transferase family 14 protein	17.0648	15.4299	19.3805	35.7927	40.7781	23.9023	46.2198	38.8153	34.2001	15.4635	15.4643	20.0527	33.4717	41.3539	27.6457	45.9399	41.8234	40.9982	20.2802	16.4658	22.6384	40.3934	32.2408	24.7448	47.0813	36.0888	30.0846
VIT_15s0046g02510	2-oxo acid dehydrogenase, lipoyl-binding site	17.1181	19.2834	20.598	21.0125	22.077	20.3359	29.4472	26.7949	26.1043	19.209	21.0923	21.4082	20.9767	20.2302	22.7348	29.0375	27.5092	23.4298	19.0205	20.0044	20.9482	19.1873	20.6149	18.6075	30.4918	28.5366	23.3142
VIT_06s0004g01420	Glycosyl hydrolase family 1 protein	17.1578	16.6559	18.1016	19.6511	14.8395	17.0901	16.5909	15.0907	15.8341	16.7593	13.5799	16.1819	18.2183	18.7238	16.3961	16.8584	14.5662	20.2042	16.4074	16.5138	19.3161	21.2534	15.1007	18.0863	15.0007	14.576	13.7269
VIT_14s0108g00540	Phosphofructokinase	17.1698	12.0811	12.4813	4.22281	7.61469	3.03408	3.01132	3.83819	3.98832	8.8259	9.67461	9.81079	4.50792	8.25899	3.29754	3.59215	5.63906	7.27285	32.6541	7.1096	11.8688	6.65766	7.55153	3.77288	4.30153	6.78979	5.565
VIT_06s0004g05900	Phosphopyruvate hydratase.	17.1975	15.2524	18.5793	11.8248	9.98838	13.4443	8.09189	7.92129	7.97404	16.7665	13.7187	17.6513	10.8547	10.9228	11.2771	8.54401	7.72617	8.23551	16.5461	15.7279	17.7992	11.5208	10.6519	13.9799	7.48332	6.85699	7.52048
VIT_12s0028g03720	1,3-beta-glucan synthase	17.2109	15.4211	22.3955	31.1218	31.3915	32.9143	18.1967	21.5224	15.2451	16.5592	15.5145	18.9895	30.2913	34.7995	30.8805	18.2401	22.3516	15.3463	17.6285	14.4988	23.293	32.9778	33.0815	33.9837	17.7783	21.4767	14.8194
VIT_07s0005g01980	Glycosyl transferase family 8 protein	17.2228	20.1489	1.58545	1.7268	0.622972	0.375596	0.746635	1.87996	5.22118	40.5973	15.1025	0.949322	0.903445	0.291529	0.289702	0.728389	2.18897	5.53355	11.7672	13.4145	1.16465	0.904648	0.498316	0.0845023	0.856585	2.27595	8.34325
VIT_04s0044g00190	Mannitol dehydrogenase	17.2636	20.7532	19.6802	4.63834	5.18108	5.92279	4.10219	2.54668	1.15903	22.5369	25.3371	11.1531	6.1871	5.8585	4.14461	5.23854	2.45648	1.22312	14.0708	24.2098	17.615	4.61937	5.39291	5.82092	5.23422	2.25116	1.6355
VIT_07s0005g00360	Glycosyl hydrolase family 1	17.3453	15.785	7.03004	11.7269	14.3003	9.15195	14.0321	18.002	20.2374	17.1726	17.46	8.59677	17.5878	19.2321	9.71487	15.2379	16.8999	19.3382	20.3607	16.7542	6.65346	21.2405	15.4812	9.04341	14.285	19.1215	15.6491
VIT_16s0098g01780	Soluble starch synthase 1, chloroplast precursor	17.4112	17.0889	26.2681	28.5018	29.0342	31.9384	102.243	97.7652	76.3051	18.5371	15.9198	22.476	28.1645	25.2762	34.4422	100.215	87.5995	70.2637	16.2757	18.0972	24.1011	27.1035	26.5244	28.3775	110.943	87.141	73.9956
VIT_17s0000g07230	Activating signal cointegrator 1 complex subunit 3	17.5164	17.8796	19.5966	16.1686	13.2533	18.6498	21.1508	23.5949	25.6448	20.4434	19.4986	19.0615	16.4068	16.5468	17.7429	20.9748	21.6546	23.7166	16.6009	15.131	19.1597	17.4136	14.6362	18.2111	23.4705	23.2755	20.0366
VIT_08s0007g02120	Glycoside hydrolase starch-binding domain-containing protein	17.5901	17.7779	30.5212	24.91	17.9328	23.5371	21.3734	17.1811	16.1635	18.0205	14.7057	21.6604	26.6433	21.4492	19.922	19.9792	16.3803	17.6384	16.4332	17.4118	31.1501	20.6003	19.7914	22.4495	16.2788	16.4067	15.2282
VIT_05s0049g01130	Aldo/keto reductase	17.6819	18.4473	20.4515	7.6199	5.18189	7.66431	1.2112	2.213	3.35977	17.7787	15.4622	17.6616	6.75424	6.42783	7.02101	1.41047	2.20905	3.7462	16.3588	15.3554	18.1479	6.86651	5.9239	8.27569	1.48664	1.4808	3.20188
VIT_12s0057g00940	Glucose-6-phosphate 1-dehydrogenase 2, chloroplast precursor	17.8662	22.0981	13.6316	13.1123	11.1147	14.0903	4.14547	2.54634	3.84553	23.0964	20.3405	15.0084	13.5173	11.4846	13.0579	4.19835	2.67806	3.63734	17.7066	20.6095	14.8293	14.5029	11.0925	14.0488	3.76399	1.88174	4.2334
VIT_00s0220g00160	Inositol polyphosphate 5-phosphatase, type II	17.9407	19.5512	22.2134	18.1634	16.8293	22.059	20.3522	20.3092	20.8607	18.2553	21.4009	22.9743	18.4512	20.6532	19.9874	19.6665	18.4084	21.3823	17.0042	18.9	21.469	20.7317	17.4724	18.579	19.6669	18.082	18.1654
VIT_19s0014g01410	Alpha-1,2-mannosyltransferase ALG9	17.9866	21.0701	14.7411	37.3999	35.6757	38.1876	55.5258	49.7724	47.4609	23.1729	25.3579	22.0647	37.4097	38.8119	38.7601	55.4188	48.4145	45.1144	15.7078	29.6047	14.8519	41.7318	38.2323	37.7713	55.6741	50.1795	42.3232
VIT_12s0028g01100	Aldo/keto reductase	18.1699	16.5895	17.1639	13.4758	11.7192	14.6425	5.77301	5.79742	5.66066	18.2217	12.8079	12.713	16.0262	10.4833	9.56231	4.61612	4.62884	4.3719	17.9535	15.6653	17.5225	15.9189	11.5195	12.2778	5.94869	4.71498	6.29858
VIT_08s0040g00670	4-alpha-glucanotransferase	18.2056	20.7753	20.3107	16.591	12.6648	17.9198	44.6124	21.0736	16.0985	18.984	22.0428	21.4652	18.6072	16.8409	25.3272	51.4719	24.2636	17.2418	16.4152	21.3163	21.5176	16.0375	13.9747	20.2315	48.2322	19.2993	16.4718
VIT_14s0108g00870	Malate dehydrogenase precursor	18.2228	12.082	27.2001	35.5328	41.5219	28.5546	48.3651	44.5216	34.8063	14.3931	9.32554	21.8646	39.7324	30.2693	34.089	49.582	45.606	34.1773	21.1138	11.3173	27.8143	30.7209	36.7352	29.8585	50.0017	39.1109	38.3636
VIT_11s0078g00420	Galactokinase	18.2892	12.658	18.0867	12.4893	14.6932	22.4929	3.1123	3.72959	5.47938	14.5344	9.4877	18.5381	16.0476	12.214	16.3961	4.5113	6.00804	3.88714	21.5007	12.1589	18.3436	13.2323	18.4244	21.3138	3.46498	3.96169	6.07132
VIT_17s0000g06420	Galactosyl transferase GMA12/MNN10	18.6232	18.6993	18.5312	17.3387	17.046	16.5502	39.5744	25.718	24.4337	21.4075	19.3597	18.2602	18.5357	17.7174	16.9649	43.7243	30.928	26.3149	17.4144	20.456	18.0248	16.3816	18.0851	16.5596	33.6703	31.6144	20.8952
VIT_11s0078g00430	L-fucokinase	18.6906	14.7234	17.1916	18.5165	12.7752	25.1424	4.25989	5.04263	7.4134	15.9753	11.4916	16.9752	17.759	19.8611	22.5025	4.38766	5.60392	8.09802	20.4428	10.3389	18.8766	18.9103	19.0156	25.8659	4.32444	4.03232	7.49781
VIT_12s0034g01790	Phosphatidylinositol-4-phosphate 5-kinase 8	18.9096	15.745	30.5218	35.4981	29.1483	30.9407	34.0103	33.3137	26.8783	14.3459	13.4009	21.7812	36.5385	32.6714	33.0592	35.3029	30.9952	25.0693	19.7013	12.543	31.8207	33.5247	34.2933	33.3561	34.3196	32.7336	25.5651
VIT_01s0026g01290	Glycosyl transferase family 14 protein	19.0768	19.6765	18.3709	6.07579	6.11513	7.17288	2.70954	3.01016	3.97433	19.2201	16.9203	15.2374	7.32675	6.05091	4.96433	2.29151	3.29441	4.81157	16.679	19.1179	20.6715	7.45286	5.95244	6.52406	2.8014	2.75244	4.63456
VIT_04s0044g00030	ATSAC1B/IBS2 (impaired in baba-induced sterility 2)	19.1217	18.995	27.1828	44.7416	41.552	61.1295	25.3941	31.7704	30.3634	17.4808	16.4783	23.4236	41.2631	44.9299	56.3293	27.621	31.5062	28.7433	19.3972	16.6045	26.6895	33.6183	46.8325	58.7607	18.4253	32.0676	31.4707
VIT_06s0004g06110	Exo-1,3-beta-glucanase	19.2652	15.5092	25.0948	16.4783	13.8616	18.6264	9.65617	9.2761	9.92996	21.3432	12.6829	21.5084	16.8926	16.1176	15.0088	11.1342	9.7144	10.436	17.6121	14.0602	25.2827	16.4952	14.8663	18.8581	10.6066	8.07279	10.2031
VIT_01s0011g01600	Exostosin	19.3326	16.7014	30.6336	21.9242	23.6835	15.3798	26.4374	20.2969	28.3841	16.9686	15.7438	23.4983	23.1239	21.5914	17.9565	26.6446	20.359	27.142	18.8249	15.9869	30.8986	24.3299	24.3633	16.1028	30.6128	22.8074	28.291
VIT_13s0074g00300	Inositol or phosphatidylinositol phosphatase	19.3965	20.3268	19.6671	18.0572	20.5736	20.2398	20.1155	21.6898	21.2107	20.3634	23.643	22.3173	20.0372	20.1033	19.342	20.8195	18.9462	21.8029	20.481	21.1604	19.5986	21.721	20.4438	21.4346	23.4219	17.1928	24.4638
VIT_04s0023g00110	Alpha-1,4-glucan-protein synthase	19.4529	17.9075	23.1839	21.504	25.5203	21.5755	25.8353	26.0352	27.5117	19.595	18.0995	21.2194	24.199	22.4323	22.0488	25.4539	25.616	29.4824	22.0267	19.0608	23.9659	22.2873	25.1385	19.5958	24.6692	26.5915	27.5127
VIT_06s0004g03020	Beta-galactosidase	19.6128	20.263	29.0038	3.22841	4.30018	3.95372	1.35365	1.45581	1.80253	24.1239	21.2902	26.2188	3.55503	4.68514	4.00727	1.99285	1.83863	3.23164	29.2791	21.3542	35.6211	3.04893	4.41402	4.21687	1.18574	1.3399	2.1708
VIT_18s0001g06520	Isoamylase protein.	19.6624	19.4715	21.3648	38.2756	29.322	36.7119	20.2512	22.4126	20.6139	20.085	20.7647	19.8291	36.0056	39.5773	32.9285	21.4918	20.581	23.3901	17.0148	20.5095	19.3983	40.1073	32.6817	37.835	18.2873	17.002	19.3173
VIT_14s0083g00340	Beta-glucan-binding protein 4	19.8027	18.2273	17.2496	26.5032	21.7978	28.3557	18.1842	11.6694	12.8907	15.0689	21.3442	19.1492	22.3549	23.5998	30.0089	19.832	13.2866	17.532	21.8038	20.2287	18.9855	23.7296	22.3722	26.7837	15.9996	11.942	13.682
VIT_01s0011g01800	Inositol monophosphatase family protein	19.8624	15.6204	15.0407	10.5094	9.24236	9.62531	2.86731	5.37207	6.44513	16.1025	14.1964	15.9243	10.6903	9.30938	9.56239	2.59874	4.94291	6.82697	18.6307	17.6671	14.8298	10.24	8.84953	9.71928	2.83626	4.2588	7.16362
VIT_01s0011g01790	Galactose-binding like	20.0082	16.8761	13.587	3.44284	6.43535	4.83334	3.65194	2.64482	3.26048	16.2044	14.4357	16.778	1.48365	2.83022	2.99521	1.49191	2.09611	2.42145	12.4311	15.4842	13.6182	5.23381	3.11259	3.44584	2.31095	1.64822	2.97634
VIT_07s0005g00390	Beta Glucosidase 11	20.1756	17.6141	31.3506	60.0307	72.9008	62.3983	22.3488	22.9985	23.6625	17.6351	14.7686	24.803	69.5716	67.6403	60.7433	19.9792	18.7108	24.4223	16.9887	17.6133	27.9824	92.405	60.0636	71.2297	17.8905	14.122	27.5049
VIT_01s0137g00630	Alpha-galactosidase/ hydrolase, hydrolyzing O-glycosyl compounds	20.511	21.9087	24.3519	27.1801	25.8846	32.38	9.25244	13.5289	12.4984	23.9168	18.6379	19.5979	28.9042	27.3562	22.7244	11.1372	12.8616	15.2425	21.406	21.9085	25.82	32.1159	26.8189	38.2191	9.76695	11.4913	14.1339
VIT_10s0116g01730	Soluble starch synthase 3, chloroplast precursor	20.6784	18.8638	24.326	39.3148	31.0999	31.9637	57.0305	50.0001	45.6426	21.5363	14.3235	18.6089	39.0722	34.769	30.7464	54.8586	48.2548	46.7272	16.4283	15.9891	21.9338	38.9671	30.0272	30.4919	60.1141	45.3725	42.4224
VIT_13s0074g00150	Dihydrolipoamide S-acetyltransferase precursor	20.6916	20.9924	21.5137	23.0907	24.3608	27.7508	14.4073	19.0494	21.7247	19.5825	21.6108	23.1116	23.6183	29.4	23.3087	16.0491	18.2054	23.7943	22.6827	21.1329	21.7695	29.0597	26.4835	31.16	15.3495	20.0371	21.0041
VIT_18s0001g00050	Dolichyl-phosphate beta-D-mannosyltransferase	20.7051	18.9697	16.107	28.5281	24.5332	25.7852	43.2976	40.1987	44.5834	20.6174	17.852	18.4045	26.8732	28.938	27.3174	42.5001	44.3434	43.6924	20.0297	18.1829	16.3263	29.9715	28.3738	24.8233	44.3056	49.2081	35.2972
VIT_19s0014g01190	Alpha-1,3-mannosyltransferase ALG2	20.7208	23.3818	22.2359	16.0875	18.859	17.0009	24.5123	21.2744	19.0804	18.7049	23.0286	23.3871	17.3634	15.6927	18.2583	24.5882	20.767	16.7175	21.7944	24.6639	22.3146	16.5944	20.0791	16.8138	24.451	21.0897	18.664
VIT_04s0023g01970	Aldose 1-epimerase	20.8146	26.3735	17.7865	12.8339	20.4003	13.5414	12.0344	20.0765	14.6794	20.6795	26.5136	16.218	16.5593	12.6053	13.0607	13.5641	14.9071	9.92981	23.089	34.4574	18.0629	13.1703	20.1842	15.1928	12.972	15.7374	21.0492
VIT_13s0067g00230	Extosin ectopically parting cells	20.8377	17.5401	13.6771	12.4258	16.0693	13.1144	14.8705	19.1826	22.269	17.9564	16.4604	14.9855	15.0478	13.5025	19.7819	17.0772	20.4296	16.772	21.3141	17.7944	14.9347	11.6348	17.447	13.133	16.2769	21.7843	25.3991
VIT_14s0068g01110	Alpha-mannosidase precursor lysosomal	20.8398	22.6413	18.2057	16.7042	14.5915	20.0339	16.2794	12.1871	12.3269	23.5653	21.2045	16.9431	15.4841	13.6539	18.2604	15.1922	12.6927	12.4514	19.2957	22.8252	18.3421	18.4862	14.2305	19.2532	14.9596	11.6251	12.3579
VIT_11s0016g02960	Glucan endo-1,3-beta-glucosidase 4 precursor	20.8699	24.693	20.0486	9.08384	6.84105	9.32743	2.44299	3.80857	4.74979	23.944	24.3221	21.4636	7.81723	7.11463	6.41541	2.50633	3.38091	5.56673	19.8234	24.2992	22.0245	9.05732	6.91731	10.8602	2.57273	2.96077	5.10619
VIT_06s0061g00480	Alpha-L-fucosidase 1 precursor	21.0023	22.5053	20.1706	12.4206	14.9202	13.1673	6.84567	7.86891	9.2293	23.4606	22.3558	23.8921	13.6381	14.7174	12.3921	7.87367	7.82672	9.13925	21.025	25.8564	22.226	14.5533	14.9536	14.0151	7.74953	7.04962	9.96292
VIT_08s0007g04700	Phosphatidylinositol-4-phosphate 5-kinase	21.102	20.3119	26.4895	18.741	14.823	22.4545	22.6885	20.8012	26.5263	22.7676	18.57	22.6118	16.0125	19.4495	26.4178	20.3466	23.7317	26.6725	20.0737	17.7112	25.3633	16.3404	18.5735	20.949	21.8294	28.6925	23.2497
VIT_01s0127g00430	phosphatidylinositol 3-kinase	21.1279	20.2125	25.0745	26.1752	22.6871	27.3901	30.6492	26.5238	27.437	22.4387	20.8388	27.4871	24.9196	24.5221	24.0023	30.2902	26.158	25.4297	20.2719	20.4565	25.6069	27.3896	22.1994	25.4256	28.9551	25.7751	23.3837
VIT_10s0003g05640	UDP-arabinose 4-epimerase 3	21.2182	13.9958	16.8169	12.4674	17.4386	9.32846	21.5081	17.4923	18.4016	12.4315	15.43	16.2495	10.0579	18.9573	13.6352	20.3644	20.976	20.1574	36.7165	12.2565	16.2873	13.3734	17.7886	12.1731	21.091	28.3064	19.0209
VIT_19s0090g01540	Beta-1,2-xylosyltransferase	21.2618	18.8272	23.267	36.9213	35.7556	33.3007	65.543	60.5	49.9111	19.7579	18.7017	20.4053	33.9655	30.3447	48.6693	59.1305	54.8675	44.973	18.7386	18.8174	25.0676	29.9272	35.4395	35.0468	64.8115	55	53.0912
VIT_14s0083g00690	Glycosyl transferase family 8 protein	21.3194	19.2135	35.7088	29.2019	32.4494	23.0503	14.4823	14.5229	9.66132	16.4204	14.9633	31.6399	29.387	31.2876	18.2291	13.6447	15.2039	12.9145	22.3049	19.3346	38.3748	31.064	27.226	24.8556	12.2112	13.9894	10.1279
VIT_05s0020g02800	Carbohydrate kinase	21.537	19.474	23.4016	28.4862	33.4672	32.2464	15.3345	18.4311	14.7168	19.0947	19.5577	24.1376	30.6265	32.667	29.1559	15.942	14.8363	13.4373	20.3456	21.9475	23.5911	32.5036	33.6822	34.446	14.0749	12.0088	14.3097
VIT_12s0142g00090	Ribose-phosphate pyrophosphokinase 4	21.6503	20.5211	22.7077	21.5726	28.5756	25.8921	31.4232	31.0501	28.1232	23.3268	24.9797	21.8652	24.5969	21.4627	20.1268	31.1195	31.034	22.9379	20.2689	21.021	22.7553	23.4538	26.8635	27.1	28.593	32.7141	27.3564
VIT_04s0023g03040	Lactoylglutathione lyase	21.6896	1.87329	8.17408	7.49737	10.3321	7.97518	11.249	10.4126	6.89742	33.1718	8.51616	25.0712	7.66392	6.0093	8.9783	5.12358	4.12303	3.78101	9.52464	4.02043	4.26206	4.85098	4.91698	6.60703	9.06922	5.95568	6.8236
VIT_07s0005g00410	Glycosyl hydrolase family 1 protein	21.7475	20.6203	31.2444	92.4721	75.6707	68.3399	37.4529	38.0314	30.3914	33.24	27.6925	38.0486	85.2205	95.4277	63.9361	47.2445	45.8898	38.6798	19.7116	26.1478	27.7356	83.3702	83.1363	69.3655	38.2053	43.3788	29.6543
VIT_14s0108g01520	Glycosyl transferase family 8 protein	21.8581	17.3816	27.907	56.6119	54.085	51.6208	56.776	59.9977	50.6335	16.6208	17.2004	21.7364	49.5486	62.3996	70.3903	57.6275	67.7431	59.5843	29.4998	14.3767	28.5855	54.0014	55.1941	62.1313	57.4019	68.713	50.9334
VIT_14s0030g02020	Aldo/keto reductase	21.9067	21.6444	16.3504	18.294	17.0563	16.1691	8.59714	8.60537	11.0217	25.0623	24.0814	16.9299	20.7692	20.0091	18.8964	11.0163	14.6806	13.7895	22.3089	25.7189	17.4127	14.7375	22.5183	16.3508	8.72626	17.4667	13.1027
VIT_19s0014g01640	Malate dehydrogenase	22.0287	20.5572	6.44404	28.9675	24.7087	12.0847	36.6049	39.4288	51.0081	25.1662	15.3788	7.39513	31.3902	23.0243	19.4694	37.809	43.9929	51.5772	23.1885	17.2644	7.22441	33.7426	24.0206	12.6585	35.9606	47.6574	44.7424
VIT_18s0001g08980	Beta-1,4-mannosyltransferase	22.0996	23.6518	22.151	13.3408	13.8116	15.3688	17.6796	17.3469	20.3367	21.9573	23.1458	23.1804	13.5511	13.4082	14.2345	17.1639	16.6297	18.3069	22.9254	23.0795	22.015	15.652	14.0293	15.6711	16.5807	17.7047	16.9539
VIT_00s0577g00020	Phosphoglycerate mutase	22.2828	21.3806	18.4199	35.3998	39.3534	32.6296	49.0874	50.0984	51.5499	19.4223	19.9653	19.7836	36.4118	35.8946	32.7259	50.9341	49.3522	45.1461	20.9976	21.636	17.8189	36.6228	40.5048	34.7657	53.0331	52.6721	47.982
VIT_14s0068g01120	Alpha-mannosidase precursor lysosomal	22.3601	27.3034	20.2521	10.2904	9.69585	12.8158	6.25083	5.47618	6.18079	26.6796	26.2953	19.4227	9.87215	9.66057	11.952	6.05488	5.4189	6.55605	20.5623	27.7504	21.9648	11.2423	9.96938	12.8601	5.77434	4.6864	7.74631
VIT_02s0012g00620	Phosphoacetylglucosamine mutase	22.7609	26.8574	22.284	16.5487	19.1326	19.1122	19.8687	18.8958	19.8286	23.4552	27.0048	25.025	17.1343	21.6875	17.829	18.622	18.1487	19.1448	22.6046	28.9235	23.1555	19.9282	19.3033	17.7837	18.1774	19.0263	19.4471
VIT_18s0001g08150	Xylan synthase	22.7819	19.5366	31.5364	35.142	32.9289	33.5098	26.4241	27.3766	29.9044	18.6198	20.9812	26.6845	34.5097	31.0462	38.7732	27.3163	27.5436	28.0059	26.898	18.9725	31.5213	34.1054	32.4412	36.6633	26.6372	29.4269	28.5272
VIT_11s0078g00380	Isoamylase isoform 1	22.9501	20.8233	24.8541	4.95129	5.37988	7.16374	1.3977	2.55918	2.63751	22.421	19.5805	21.7404	4.9759	4.48894	5.54471	1.46797	2.07653	2.44457	21.5276	24.5653	22.4645	4.94019	5.51913	5.84025	1.38046	1.85745	3.43283
VIT_01s0011g01420	UDP-N-acetylglucosamine pyrophosphorylase	23.178	19.7628	14.1668	25.416	36.1888	23.9435	77.3793	83.1988	95.1244	20.9272	17.4473	17.2018	26.6906	28.0047	25.7988	66.113	69.2148	74.5288	23.6567	18.5974	16.1399	32.8483	30.5042	26.3312	81.5379	84.1642	78.8807
VIT_03s0017g01400	Adhesive/proline-rich protein	23.293	25.9832	11.6063	14.6656	20.0093	9.48756	6.22432	16.0725	5.24626	8.20167	26.4426	6.81132	8.01453	22.2739	6.67043	9.04234	15.5809	5.37888	39.5411	27.1636	11.0342	19.9139	22.1712	11.2661	8.45135	19.9154	4.98813
VIT_01s0137g00810	Acetylglucosaminyltransferase	23.3797	26.935	10.7176	38.6292	37.1575	37.0967	16.9601	34.3719	29.8188	24.9545	26.5249	12.7463	33.7308	36.3247	45.1546	15.1752	29.3893	29.9307	25.7621	27.3502	11.1013	40.6187	35.701	37.5065	15.7964	29.9607	34.8933
VIT_09s0002g02340	6-phosphogluconate dehydrogenase	23.5852	22.4327	22.3989	15.265	13.8234	15.2165	13.3337	13.4984	14.0811	22.7726	20.1556	20.1219	16.3012	15.6114	14.9754	11.9823	11.4326	15.4141	22.6675	24.0847	23.2582	17.5592	13.9581	16.6851	12.6341	10.4829	13.6152
VIT_08s0040g00320	Alpha-L-arabinofuranosidase	23.8068	27.7956	32.5593	57.6655	62.139	55.8218	98.5742	72.7451	77.8708	28.9915	27.9441	26.9671	57.9395	60.5931	62.8276	89.4151	68.3132	72.6785	26.4507	29.2134	35.4883	76.5133	61.0675	60.5919	108.013	76.8048	73.0929
VIT_07s0005g00150	Galactosyl transferase GMA12/MNN10	23.8931	21.1714	34.2776	28.0113	19.0622	51.7638	17.7257	24.9848	18.7122	19.6811	15.6934	21.2639	19.7237	18.3004	46.4598	14.949	26.3549	24.5958	28.7287	21.1955	37.464	18.6342	18.7272	46.8931	11.9105	29.3446	27.4829
VIT_11s0016g05560	Glucan endo-1,3-beta-glucosidase 7 precursor	23.9807	23.7669	20.6898	46.4635	47.8583	39.2605	28.2642	39.7105	38.4527	22.7899	21.9385	23.0553	43.1133	55.2829	32.2587	29.8503	38.149	43.4272	22.4546	23.311	22.8169	54.9797	43.092	41.2892	29.5543	36.5813	34.1332
VIT_03s0063g00360	Glycoprotein 3-alpha-L-fucosyltransferase	24.1555	23.4873	23.6302	34.5713	36.6406	28.955	30.6025	31.5992	30.4509	21.3968	23.4946	23.4164	30.4884	33.002	28.7875	29.0989	29.529	27.7069	24.4973	24.8741	21.5179	31.8161	35.7747	29.1615	26.5162	29.5818	28.8318
VIT_11s0016g02200	Beta-galactosidase	24.2027	48.5519	26.4526	72.3395	57.8044	58.5697	60.5461	55.6666	83.5412	35.0205	56.7612	19.4017	53.3021	54.466	48.4551	52.1978	61.1534	80.7994	24.5518	47.7009	38.974	67.1001	69.0653	48.5698	54.0496	80.9181	72.5539
VIT_13s0073g00310	Pyridine nucleotide-disulphide oxidoreductase	24.2184	21.8178	27.6314	36.8436	35.697	34.9764	44.7174	42.9893	32.512	21.8659	21.9445	25.4798	33.9228	36.2129	34.3925	42.7685	37.9016	34.6932	25.9125	24.9407	26.8599	34.7308	35.9589	38.3403	39.5872	38.0739	32.601
VIT_17s0000g06220	Exostosin	24.227	19.7961	29.6134	21.6425	21.3782	26.638	39.8113	34.2408	32.5679	19.1918	23.3977	21.6119	16.308	18.5593	30.7014	36.3574	32.0202	30.0219	22.0411	18.9798	26.249	17.3916	19.2167	25.2823	39.2846	28.8188	35.6711
VIT_05s0029g01090	Alpha 1,3-glucosidase	24.6174	24.7047	23.2874	40.8416	36.0751	35.5055	46.0611	39.1165	44.0613	28.2477	25.3265	24.3104	38.4761	39.7232	36.0415	48.3251	41.2479	47.6672	22.6707	26.4537	24.2533	39.6827	34.4809	33.0547	43.9594	39.5617	39.4101
VIT_11s0078g00310	Isoamylase-type starch-debranching enzyme 1	24.7903	24.9174	28.8163	7.57869	5.75052	8.55424	1.96249	2.92107	3.85511	27.1974	22.6237	25.7175	7.53602	7.42878	8.09773	1.99291	3.17209	4.5953	23.3638	24.2445	27.6013	7.56035	6.88567	8.78927	1.82179	2.37662	4.78509
VIT_07s0005g04260	Dolichol-phosphate mannosyltransferase	25.3341	22.0315	20.8774	30.1064	32.97	28.4277	56.6076	62.4849	61.3375	25.5378	21.9789	22.1526	31.4844	29.4985	27.1422	55.5803	60.6861	49.2723	25.681	20.7784	20.0744	28.2356	31.1565	31.9111	59.2306	64.4917	52.1715
VIT_11s0016g05770	Alkaline alpha galactosidase 2	25.3594	20.1151	35.5562	330.245	292.031	87.0962	71.2068	162.954	154.668	16.5031	21.2169	17.4261	349.476	280.99	91.8489	91.0075	163.614	182.884	36.0732	15.7765	28.2084	395.279	221.353	105.965	83.6425	135.149	138.963
VIT_11s0016g05210	Acetylglucosaminyltransferase	25.704	22.3549	37.8317	40.5208	34.6027	43.9282	33.6769	31.0967	33.4497	22.2227	21.2954	35.879	36.2054	33.5122	44.7516	33.6941	36.0075	41.1108	25.5743	23.2737	37.2174	34.5362	33.0702	39.2285	30.3117	38.1714	33.852
VIT_11s0052g01400	Ribitol kinase	25.7431	29.0339	22.5783	16.8136	19.776	17.9929	22.2949	24.9274	24.4269	26.252	32.3307	19.7773	17.3288	16.1249	17.9236	20.1786	22.6913	21.2285	25.6678	35.3636	21.7252	18.66	18.7734	16.95	21.6335	23.1002	24.4954
VIT_17s0000g03240	Inositol polyphosphate multikinase	25.8012	20.3878	28.6035	20.5092	24.2532	22.6222	10.8855	14.5696	13.7952	23.374	19.6214	25.6672	22.2137	17.8463	23.3796	10.8398	14.1914	12.3797	22.9585	21.5121	26.2593	17.4334	24.3145	21.4958	10.1195	12.761	17.1281
VIT_11s0065g00150	Glycogen synthase	26.089	29.1532	24.6599	11.4959	11.8359	12.9825	11.7081	9.87543	7.40802	27.021	27.7939	27.5024	13.7776	12.1337	10.9546	11.3724	8.65272	7.51486	23.0191	29.1228	25.2519	15.7598	11.6386	14.1111	12.016	8.54163	7.9124
VIT_08s0007g07560	Glucan endo-1,3-beta-glucosidase 5 precursor	26.1746	18.7309	20.5183	16.1336	14.7835	14.3815	8.27681	9.1136	12.0873	18.9717	20.2116	20.6869	15.9595	14.4603	17.4905	8.56061	10.2101	13.0299	38.4618	18.1055	20.8292	18.4809	15.4026	15.5167	8.29341	11.2872	13.4056
VIT_13s0074g00720	Neutral/alkaline invertase	26.3578	23.1421	23.8865	35.2857	39.6272	38.1011	27.3814	28.6286	34.2174	22.8002	22.3733	25.1627	34.6041	34.3451	42.1989	25.848	30.558	27.7333	28.2001	20.1135	23.0077	38.9008	39.7871	33.7888	28.6243	32.9954	35.0987
VIT_17s0000g04540	Enolase	26.3825	22.3381	29.4494	43.2343	55.7542	36.319	52.3025	58.0951	49.9053	18.8106	20.2639	30.1717	43.201	51.9164	43.632	51.2331	59.7911	45.2709	25.778	20.0125	30.2997	45.7498	50.5199	36.8065	59.0418	63.153	43.3478
VIT_13s0074g00210	Pyruvate kinase	26.4116	25.0435	22.4166	18.654	20.8478	19.9844	23.1621	26.7214	28.2149	22.9617	24.1053	23.034	19.7281	21.7403	23.1843	24.3597	25.8532	28.8609	26.7248	29.1361	22.8268	22.8918	23.2103	24.155	34.6907	33.0599	30.9292
VIT_06s0004g05530	Serine/threonine protein phosphatase PP1	26.921	23.95	22.3705	18.0692	20.9323	20.3563	12.7772	13.6591	14.5905	27.7934	25.0029	26.897	21.3462	19.727	22.4791	14.0258	15.759	13.4246	28.5191	25.3916	25.6567	19.1783	22.746	20.8827	12.7679	16.1768	14.8023
VIT_12s0028g02540	Glucan endo-1,3-beta-glucosidase 1 precursor	27.0758	24.1908	29.6245	12.5391	14.3915	10.6103	3.606	8.10402	7.08945	22.1329	27.6688	31.3287	15.046	8.58407	6.93425	3.67013	7.04926	6.99329	25.2528	36.6543	29.3534	11.8301	11.0029	12.9492	4.03611	5.38447	8.50593
VIT_07s0289g00050	UDP-glucose:salicylic acid glucosyltransferase	27.1578	20.1173	22.7361	30.2719	28.9568	27.9789	21.0447	22.1114	20.3655	25.3526	19.191	22.8168	28.5612	24.5559	28.5814	22.8192	19.9606	19.756	25.0513	22.0056	21.3922	26.482	28.6651	27.1264	20.6306	17.8634	23.1843
VIT_03s0038g03120	Isocitrate dehydrogenase subunit 1	27.1976	23.7606	25.8624	41.0235	46.5056	38.1091	71.4279	56.2414	51.5123	22.2198	21.8081	24.9252	42.8551	48.9145	45.1884	72.9059	64.1248	50.9624	28.3946	21.4636	26.224	42.6204	50.122	40.6582	74.1626	65.4829	46.2553
VIT_02s0025g02120	1,4-alpha-D-glucan maltohydrolase	27.2584	24.895	25.3552	32.1389	32.4409	32.0251	27.6881	23.7412	23.3609	25.4644	20.816	23.5765	32.708	27.086	28.1891	24.1859	24.8621	21.8327	24.0693	25.6451	24.6287	31.9498	30.8401	33.0674	25.7397	21.6901	24.0982
VIT_14s0066g00340	L-fucokinase	27.3033	25.3224	20.0463	16.9101	17.5543	17.5173	8.70677	5.76247	9.24017	27.8796	20.0108	21.2133	20.602	15.2978	16.0884	8.24408	7.53111	8.50866	28.114	20.3918	26.8335	23.0483	20.1044	15.7146	7.59785	7.76959	11.5204
VIT_18s0001g13100	Glycosyl transferase family 1 protein	27.3426	28.0654	27.991	26.6682	23.4456	25.1798	34.8024	34.0407	34.8914	27.7799	28.9431	29.8894	26.7078	28.4253	26.3158	34.8029	33.1373	36.7637	25.2542	27.8907	27.447	28.559	23.3639	23.7728	34.7391	34.8009	34.8755
VIT_15s0046g01430	Aldose 1-epimerase	27.3479	23.5313	32.5083	14.3081	19.1981	12.5694	17.4704	12.0813	8.52196	32.5611	33.9399	33.167	15.442	12.788	10.5306	13.2243	8.78443	8.25002	25.6329	23.7256	32.4563	14.7241	11.8047	13.2091	16.9408	6.01631	12.1042
VIT_17s0000g06960	UDP-glucose 6-dehydrogenase	27.3721	25.5605	20.5749	37.9031	37.4116	29.9779	42.1626	46.7824	57.6737	23.1386	30.2156	21.5966	31.3943	32.4323	35.4789	29.0318	35.6219	39.8916	45.0625	18.7921	23.4058	32.8137	35.3221	30.3761	43.1619	69.3058	51.843
VIT_01s0010g00600	Phosphatidylinositol 4-kinase type-II	27.3862	29.3334	14.017	14.8981	21.4621	8.51128	11.7347	12.523	10.2715	29.6024	33.9435	29.9964	17.742	20.0172	7.71534	10.5119	13.7873	8.18641	35.8753	32.848	18.4601	22.9778	18.0489	9.7907	12.178	13.853	8.15236
VIT_17s0000g00290	Alpha-mannosidase precursor lysosomal	27.4326	25.5975	23.9186	25.2327	21.1146	21.0817	3.12377	2.78578	3.57928	26.3964	20.1477	20.224	27.3279	22.0065	21.6935	3.69714	2.77033	4.06958	30.4504	25.2655	26.9361	33.1046	24.0027	25.8994	3.33738	1.95926	5.91477
VIT_04s0210g00180	Isocitrate dehydrogenase subunit 1	27.5017	24.9808	26.4434	44.3031	45.2255	37.5711	48.8193	50.2549	57.3826	26.596	24.5339	28.6823	40.5246	45.438	34.7749	45.9871	48.0756	58.8848	28.5942	28.3927	27.5301	46.7585	39.0304	36.4661	42.816	43.2755	49.1033
VIT_01s0011g04790	1-phosphatidylinositol-3-phosphate 5-kinase	27.7225	38.3325	38.3699	20.9314	20.1742	38.8108	13.9113	12.1867	14.7588	33.4919	45.0533	35.5058	19.0853	21.439	42.1652	15.3122	13.9752	14.1909	25.8143	41.204	41.0656	23.8904	25.1709	43.8994	16.2038	14.8787	17.2303
VIT_18s0001g08030	Phosphoglycerate mutase	27.7807	18.6925	37.293	23.5131	24.6142	25.2946	18.055	16.9504	15.8449	21.6886	19.6263	36.0987	27.0331	24.5324	27.1695	19.2514	17.4667	15.4777	24.6778	18.6919	34.7416	25.4268	26.3444	22.9283	16.5221	17.8777	17.1419
VIT_16s0050g02660	Pyruvate kinase	27.8202	25.2349	29.9667	33.9199	34.5211	34.4002	49.5787	47.7304	41.2106	29.2063	22.4872	29.9557	32.1481	32.6771	35.2255	48.7573	48.1786	37.5812	19.0963	22.9853	27.6427	30.8934	32.3302	34.291	49.4445	46.5711	36.9408
VIT_04s0044g01480	3'(2'),5'-bisphosphate nucleotidase	27.9817	24.6024	29.866	25.0388	23.6849	27.8195	16.7502	15.3428	14.1807	25.9041	23.2649	27.8145	25.4406	21.9396	24.8258	16.7268	14.1573	13.4217	26.4116	26.5084	28.4493	23.5246	24.527	27.3684	15.4905	13.4939	15.6307
VIT_13s0019g02410	Serine/threonine protein phosphatase PP1	28.6727	23.9354	26.1013	40.0932	48.7614	45.5955	49.0732	44.4009	42.2411	24.2918	21.6732	28.9978	42.479	42.8693	40.8392	49.7874	43.9144	32.5423	29.9105	21.5852	27.8174	42.5385	50.9455	42.6703	46.3801	48.4424	37.818
VIT_18s0086g00710	1-phosphatidylinositol-3-phosphate 5-kinase	28.8122	31.413	29.877	41.0442	31.4616	29.3552	39.6053	40.916	46.0397	23.462	32.2574	33.0865	41.6617	34.3942	27.7459	39.5106	40.5963	40.5596	29.2384	29.8435	31.4824	40.9841	35.8975	27.5441	40.9638	45.1362	39.651
VIT_13s0156g00210	Callose synthase	28.8429	37.6562	35.7284	20.4166	23.5786	28.1589	54.1704	34.5736	29.9571	35.7435	44.9691	35.8061	22.6839	25.5606	23.7564	52.2964	38.8568	30.3683	24.5827	41.2128	34.2919	24.1896	25.1395	27.1123	54.0235	44.0915	29.1348
VIT_13s0019g00040	Beta-N-acetylhexosaminidase	29.0714	39.9374	38.0268	37.5517	35.9253	41.6557	50.8329	56.9358	58.3204	39.6119	37.8391	34.5307	35.425	36.6538	40.1567	49.7439	53.569	52.8979	29.5722	42.3945	40.0159	38.5292	37.9672	37.7011	48.6921	52.8557	51.4412
VIT_11s0016g00440	Phosphoinositide phosphatase	29.1845	23.32	35.7563	48.6402	43.3065	47.387	35.2818	33.648	32.8805	21.9145	21.1064	26.7973	45.3069	51.7191	56.1841	34.5576	32.7437	35.9896	35.8963	18.144	33.938	49.815	46.4941	49.4966	35.619	33.4112	30.9971
VIT_09s0054g00370	Mannosyl-oligosaccharide 1,2-alpha-mannosidase IA	29.5254	30.9814	24.2068	35.6878	35.3997	27.4585	51.4384	47.6409	44.5159	30.5849	33.3588	26.6576	33.952	37.9936	34.5647	52.5365	47.4537	44.8992	28.8779	31.7295	26.2394	35.7006	33.2685	28.5539	53.4247	49.7286	42.331
VIT_16s0022g02320	Phosphoglucomutase chloroplast precursor	29.5378	37.8721	40.0924	14.4509	13.2319	19.7034	30.7985	23.5854	18.883	31.8766	37.9467	35.2462	15.4754	14.175	16.5928	29.8544	24.8192	18.0243	27.2539	42.4695	41.0139	16.677	15.0651	20.4498	29.9422	24.7152	19.5581
VIT_19s0014g00180	Ribokinase	29.6407	32.7801	26.9232	39.6105	39.642	34.1612	30.6589	38.5931	36.846	31.4224	31.2271	25.7586	36.2288	39.5972	28.9931	32.6479	35.824	38.0908	27.2809	40.7523	26.8833	40.2137	37.9947	32.6271	32.3915	32.9498	34.1925
VIT_07s0031g00060	3-beta-glucuronosyltransferase	29.7127	24.7997	39.544	37.2055	41.7874	40.4308	28.026	31.2809	27.4589	26.9966	27.1241	37.8346	38.0701	38.1231	44.6281	27.6301	32.5442	25.4549	27.7314	26.1263	38.3508	37.2131	41.6026	43.1763	28.5515	35.755	22.2823
VIT_14s0060g01750	Serine/threonine-protein phosphatase PP1	29.7946	24.5084	33.344	43.3612	44.4815	39.938	35.2129	34.8699	31.5008	24.3274	22.4247	28.4543	47.2149	39.574	36.7415	34.2989	36.0938	22.8291	28.3532	18.2694	35.6726	42.6426	49.0236	38.4888	34.5354	36.1517	30.8378
VIT_08s0040g01380	Acylphosphatase family	29.9077	29.1817	22.0161	12.2952	15.192	12.82	17.0069	16.5791	18.3386	28.71	25.9774	23.1668	12.6123	10.4563	11.1329	16.8573	18.9228	16.7462	31.5751	35.1042	20.2083	13.7122	14.531	11.5752	17.5209	17.5641	14.8974
VIT_02s0087g00440	Beta-amylase 8	30.0373	29.8742	35.9024	33.0638	29.1169	34.4677	42.4767	41.4992	44.4185	30.3001	32.7492	38.761	30.3398	35.7319	30.5952	39.1044	40.2869	45.443	28.4328	35.107	34.4324	36.1126	28.1045	32.7119	41.3266	42.5202	34.0433
VIT_19s0014g03250	Beta-mannosidase 4	30.1014	37.5513	11.7164	6.58205	4.12618	5.66977	3.9989	3.10014	3.53374	36.745	28.3238	16.8859	7.81847	6.58908	4.83157	4.64013	3.11575	3.95697	27.0615	35.8324	13.9806	9.04959	4.57942	5.67763	4.46268	2.50163	3.54862
VIT_13s0019g04370	Phosphoglucomutase/phosphomannomutase	30.1396	36.8713	20.6599	31.9858	35.4006	27.6276	56.5946	67.8565	83.6039	35.0093	42.324	22.6279	35.1904	33.794	31.8	56.8609	61.8813	78.369	32.3457	41.0639	21.5428	40.4896	38.3992	28.6802	59.8799	72.5129	75.7073
VIT_14s0060g00640	Glucose-6-phosphate dehydrogenase	30.1791	36.4352	33.914	17.1019	22.8963	19.6247	22.4488	20.9392	19.7178	30.6332	40.1405	51.0033	21.1833	21.1166	16.4058	21.7574	20.5971	17.7383	31.8318	38.287	36.9842	23.7038	24.511	20.9114	22.871	21.8574	20.7705
VIT_02s0012g00090	Phosphatidylinositol-4-phosphate 5-kinase	30.6032	28.4301	38.3681	77.1751	65.4928	127.734	40.5579	27.5093	28.3335	39.4357	25.8022	43.4876	75.9384	81.0239	142.552	39.8853	30.5188	37.0349	26.4655	29.7488	43.0305	70.3201	67.954	117.177	28.8375	18.8444	38.5374
VIT_14s0066g00950	Isocitrate dehydrogenase, chloroplast precursor	30.8418	31.0345	35.0941	51.9897	45.2162	53.0323	48.24	50.787	51.5296	31.8444	29.2124	36.1652	54.5282	55.8034	46.0307	48.9155	45.9228	51.8033	28.8393	28.0991	36.6641	61.3973	50.0111	51.5076	49.125	50.5255	38.2975
VIT_18s0072g01040	Invertase, neutral/alkaline	30.9764	26.6891	28.6982	18.0405	22.8337	15.0042	12.448	11.9306	13.1075	24.6475	25.6183	34.5456	16.7836	19.8873	18.697	12.8108	11.737	11.0031	37.1658	24.7503	33.221	20.1888	21.8581	17.029	13.1978	12.0725	11.979
VIT_19s0085g00600	Glyceraldehyde-3-phosphate dehydrogenase, cytosolic	31.5056	29.2729	31.9151	61.6184	72.0034	45.1318	170.391	152.873	144.792	25.0904	39.0121	33.9236	54.7988	63.6676	50.9547	174.105	148.109	129.825	41.9898	30.347	26.4452	51.1309	62.6703	39.7324	184.844	178.74	113.791
VIT_18s0001g00560	Alpha-amylase / 1,4-alpha-D-glucan glucanohydrolase	31.8864	29.0971	32.461	35.2964	31.4053	30.9282	44.4084	37.548	40.2195	25.0374	25.7668	27.4557	34.5175	39.5648	34.3778	38.0631	34.1545	38.8205	33.9193	27.1483	31.5859	38.73	35.9257	31.714	39.7411	34.4128	33.5617
VIT_02s0025g00900	6-phosphogluconate dehydrogenase	32.3399	41.1319	57.5501	96.9324	111.944	70.6664	128.722	115.219	110.558	48.287	62.7098	64.3655	89.4238	110.88	81.0133	130.662	116.023	125.34	31.0784	40.4027	48.8836	101.107	89.0271	73.6642	137.138	111.567	103.645
VIT_13s0019g01180	Glucan endo-1,3-beta-glucosidase precursor	32.3889	19.4886	30.0601	19.2066	31.3741	12.4269	3.75096	7.69098	4.74438	19.1017	19.1666	24.5931	27.4233	45.287	17.5758	6.2526	11.6841	9.2233	48.5141	15.9893	29.539	33.2903	44.392	17.8165	5.89059	11.0965	6.33114
VIT_09s0002g02290	Beta-galactosidase	32.4415	33.6288	29.2714	17.412	16.0093	19.5906	7.41137	6.85755	6.71249	28.9819	27.7681	26.1801	17.4368	18.6947	17.62	8.26912	7.55301	7.47949	29.0917	33.9529	27.9173	19.1081	17.212	23.3442	7.14857	6.09036	7.15814
VIT_17s0053g00120	Succinyl-CoA ligase alpha 2 subunit	32.578	30.91	25.6483	55.1286	57.8267	48.5722	113.312	96.1367	89.2369	32.4892	27.8653	26.4957	54.4949	55.9235	62.7479	115.493	106.906	88.0339	33.3631	29.6532	26.5116	50.5971	60.39	49.3912	109.686	111.412	80.3516
VIT_05s0049g00890	Serine/threonine-protein phosphatase PP1	32.8098	27.7715	47.327	31.1845	33.6187	33.1412	39.0452	32.3554	31.8259	27.7987	26.2354	42.891	31.9796	25.0988	29.71	36.2841	31.4621	23.2158	34.5071	24.9625	47.2827	27.8688	34.35	30.5294	34.0086	30.2792	28.6628
VIT_09s0002g00590	Phosphoinositide phosphatase	32.9593	26.2858	76.0517	46.4212	49.8553	51.4474	42.7554	48.8637	43.5466	25.8626	23.0017	55.5024	51.4106	56.4256	50.3785	45.0517	44.4489	42.5988	42.7269	20.3015	76.1177	57.659	52.0528	61.2362	45.7744	46.9373	40.7636
VIT_11s0016g03320	Oligosaccharyl transferase STT3 subunit	33.0214	30.6412	34.861	46.91	48.0656	43.6877	58.8853	50.0843	45.2279	32.7611	32.1534	37.9137	47.0443	47.8224	40.2079	63.5537	55.0934	43.3912	38.3711	31.6533	39.9168	47.0126	51.3765	47.0536	59.301	55.0937	39.2073
VIT_07s0031g02480	Beta-galactosidase	33.294	26.2005	43.3163	11.7784	9.0766	19.0382	0.291062	0.510711	0.401792	28.5791	22.4395	39.9029	12.3658	8.99657	10.7337	0.548619	0.420936	0.97722	36.4216	24.1669	54.6147	12.5439	10.3817	26.7221	0.228743	0.424286	1.18883
VIT_13s0067g03000	Beta Galactosidase	33.3424	33.044	35.9941	35.0609	30.9063	38.7533	24.7371	30.5706	30.4046	33.9626	34.4625	32.7447	32.0397	32.0257	37.3166	23.126	26.8141	27.4082	28.8231	31.3621	34.2276	36.472	33.3914	37.5291	25.7603	26.0808	28.3458
VIT_06s0009g01580	Glycosyl hydrolase family 17 protein	33.9623	26.5919	32.6543	32.9106	38.1645	29.3923	24.9008	22.4606	22.6455	29.4187	25.005	33.1893	38.6121	28.7611	32.124	26.7542	23.8241	16.6981	34.4649	26.993	35.1874	29.2088	39.184	29.6145	24.7161	18.7702	25.5796
VIT_15s0046g02700	Acyl-CoA thioesterase	34.0867	27.443	32.1253	28.4756	29.0497	26.3312	30.9398	31.2748	30.8489	31.0098	27.4677	25.3096	30.7624	28.3131	25.8385	29.912	31.3494	27.0507	40.2985	26.16	29.1327	30.7102	30.1128	27.8313	30.3788	31.291	27.2455
VIT_17s0000g06590	Galactosyl transferase GMA12/MNN10	34.0968	49.7369	66.0491	62.6614	58.49	83.1318	48.5685	66.6881	41.1857	25.739	63.108	39.3957	49.6973	56.4921	87.6176	37.3663	70.0615	53.3995	37.22	66.7653	59.4865	53.9908	54.5933	82.1712	41.1916	61.7402	57.0582
VIT_17s0000g10020	1,3-beta-glucan synthase	34.6883	34.6014	28.8992	22.7981	20.4318	30.4998	8.83714	12.7565	12.7725	34.7642	34.5172	31.9229	22.2677	23.7442	24.7023	9.72653	13.4433	11.5755	40.5797	37.6437	29.9078	25.4708	23.3001	32.1087	10.5317	11.5634	13.6003
VIT_07s0104g00440	Endo-1,3;1,4-beta-D-glucanase precursor	34.7599	36.9443	37.6623	64.3985	83.6998	55.7789	107.052	105.881	71.87	31.7804	33.9036	42.2281	68.4379	64.4655	58.0151	119.33	98.6651	63.5918	33.5012	40.7784	39.2953	68.9173	86.2164	61.0869	116.842	98.702	71.4715
VIT_02s0154g00100	Transaldolase totaL2	34.77	35.4553	32.6271	43.7829	43.5823	47.2597	26.7531	24.9776	23.1518	33.4242	32.1697	28.5833	44.3282	39.2518	43.4734	27.6377	20.0857	21.1039	35.8988	35.8967	32.8496	54.0984	44.1593	46.4839	26.2997	15.0984	24.092
VIT_03s0063g00050	UDP-glucuronosyl/UDP-glucosyltransferase	34.8176	35.8199	55.9229	77.781	78.6565	77.7061	41.4582	63.2274	50.6431	24.4472	44.0548	39.1885	97.7334	98.3242	109.06	45.7284	68.9665	57.84	38.8958	36.6574	48.7227	71.8987	99.9965	81.0762	43.5087	70.8411	59.7594
VIT_04s0008g01190	UDP-sulfoquinovose synthase SQD1	35.0801	37.2156	35.2346	22.1851	22.4007	26.2679	9.36045	18.2703	22.4137	37.3383	34.175	33.0961	20.9449	22.2572	24.2135	9.50868	14.142	19.0719	33.1439	40.2476	37.7533	26.1731	21.4097	26.6284	11.1827	13.5021	25.0874
VIT_18s0001g02440	Aldehyde dehydrogenase	35.2436	33.363	39.3753	24.4334	22.8171	24.2826	33.462	29.8098	32.3485	39.4565	29.3498	38.1813	25.2571	25.3957	23.3937	31.7744	34.373	32.1818	29.8989	31.0508	38.7428	27.1172	24.4333	24.5114	33.4512	39.3205	29.7037
VIT_18s0001g08260	Xylulose kinase	35.4134	31.4126	30.7023	34.1957	33.4107	43.4882	35.5703	19.0162	20.4084	38.8862	27.0965	30.2801	34.8381	29.2884	37.4506	30.5417	19.485	20.0743	30.3653	30.7281	29.774	35.4071	31.3424	38.7081	30.4467	14.0132	25.9512
VIT_01s0026g00990	Pyruvate dehydrogenase E1 component alpha subunit	35.4696	29.4454	36.7765	57.2012	70.7555	53.9772	85.5778	70.1039	76.5384	30.0061	27.7596	38.3298	65.0118	73.0024	59.8229	87.5593	84.6741	88.5677	36.2859	28.2316	36.0267	57.0724	68.7932	51.7883	79.4977	82.9218	64.8301
VIT_05s0077g01210	Dihydrolipoyl dehydrogenase	35.6763	38.5444	28.4642	29.7882	30.6693	32.1822	23.6661	32.2471	34.2689	40.4024	47.0371	32.8429	31.6626	31.2568	27.6157	23.4805	29.645	32.3713	37.7641	40.925	30.1349	33.62	30.1789	32.0894	27.4276	27.7662	31.6606
VIT_01s0127g00260	ATP-citrate synthase	35.7186	35.249	28.6637	94.4277	146.388	56.1103	55.9795	82.4582	90.7729	32.5168	33.7946	28.6476	105.391	172.389	78.2708	75.0809	109.916	125.034	47.3371	37.491	29.3984	109.623	139.569	60.2318	65.3209	117.642	84.6978
VIT_02s0012g00530	Ribose-phosphate pyrophosphokinase 1	36.0289	38.8341	21.4962	21.6642	20.1551	14.5706	28.7348	24.6735	24.9216	20.5968	34.9726	21.2936	18.1735	16.6069	16.4096	27.6878	24.0433	20.7507	81.1882	32.2777	24.5161	24.5376	18.8002	14.4427	33.4001	23.1451	23.0998
VIT_14s0128g00710	Mannosylglycoprotein endo-beta-mannosidase	36.2352	33.9789	34.2764	23.0227	18.8094	23.9387	7.35363	8.8489	10.5113	33.237	31.4314	41.4498	21.2257	21.0107	20.456	7.37908	8.47298	10.2234	36.9934	30.7824	37.2251	24.1626	20.755	23.7961	7.4786	8.48531	10.577
VIT_00s0371g00050	Mannitol dehydrogenase	36.3896	32.6453	42.607	124.35	146.138	103.216	21.8916	40.5848	24.7553	33.131	21.8427	30.7593	172.853	142.382	125.635	31.9532	42.054	24.2569	34.7955	32.292	45.6751	132.753	150.887	111.343	31.9165	26.0433	44.7707
VIT_14s0068g00640	Acetyl-CoA synthetase	36.3956	38.2487	32.4385	131.407	136.994	130.138	96.961	102.999	95.1632	36.9082	36.8075	34.1682	146.938	134.229	139.255	106.734	104.85	95.2973	41.237	44.0599	34.1053	134.274	133.72	132.032	101.793	89.7518	112.263
VIT_01s0026g00280	Trehalose 6-phosphate synthase	36.5233	33.7545	41.4204	47.7889	65.4576	40.5229	22.1652	37.3026	32.5761	29.4146	41.6285	39.6107	48.7167	61.6504	36.3562	20.842	32.907	35.7511	53.3373	30.2929	39.2526	74.6422	62.3315	41.0622	26.3982	38.5888	36.49
VIT_01s0011g05960	Trehalose-phosphatase	36.8347	50.1058	40.354	19.5939	17.346	25.4549	10.6189	11.4948	20.3749	47.617	63.3105	54.0299	20.6296	21.8258	21.6737	11.633	14.5031	20.9696	37.6612	53.7237	51.227	22.4203	22.5708	21.7165	12.077	17.0443	21.9317
VIT_12s0035g00880	Lactoylglutathione lyase	36.9787	22.497	12.1345	19.06	10.521	40.0301	0.0756877	0.521089	0.695465	24.8473	11.2037	9.47967	35.9808	14.0947	27.1618	0.379943	0.520133	0.668012	34.0959	13.0668	19.1374	22.4716	13.5572	61.7045	0.389058	0.316757	0.856412
VIT_00s0304g00080	Trehalose-6-phosphate phosphatase	37.0367	34.1478	19.1254	11.891	14.7108	10.4008	0.523534	5.56406	3.84628	23.1261	27.0675	41.5049	14.2413	18.7266	6.1988	0.679727	5.61481	3.26733	81.4888	31.9306	22.8431	18.3309	17.0097	12.3238	0.681903	7.52127	3.7303
VIT_00s0373g00040	Malate dehydrogenase Glyoxysomal	37.1586	37.3412	27.9337	38.2072	46.6679	39.1333	73.8657	79.2882	71.2973	43.0357	39.1122	27.8189	38.0085	37.1755	36.4393	73.3551	82.6359	59.8245	37.1236	42.1021	27.3786	36.4582	48.4851	40.8112	75.4636	87.592	65.0658
VIT_00s0455g00040	Glycosyl transferase family 8 protein	37.2499	31.2172	53.9291	36.9732	28.453	44.5721	18.9159	22.1556	18.3972	34.0364	26.3207	39.7969	35.5299	33.9624	43.9074	18.9864	24.8292	21.8483	36.6708	27.0768	50.9797	32.2971	29.4095	45.5005	14.1366	20.6984	19.6809
VIT_14s0006g01410	fructokinase-2	37.3478	32.436	40.1047	21.2296	20.4112	23.4568	6.87295	9.45705	13.2452	37.8434	27.4732	38.6416	22.6822	20.6291	22.6742	7.0333	10.1756	12.6097	36.1859	31.4663	41.4475	21.2622	19.9434	23.3024	6.5079	8.71807	13.0716
VIT_18s0157g00210	Inositol-1,4,5-trisphosphate 5-Phosphatase	37.4162	37.6195	49.8429	31.1897	25.4882	30.0828	47.1258	60.5229	59.4735	34.8577	33.2383	37.3281	27.7302	32.1955	30.2426	43.9647	64.9791	55.6589	31.5183	37.8551	42.1726	25.2154	31.111	23.7426	38.677	70.7868	62.9344
VIT_06s0004g01200	Beta-1,3-glucan synthase	37.5312	37.1841	35.4589	20.3534	17.9469	26.8534	18.3571	19.4882	17.3078	36.891	38.949	38.8131	20.8575	21.232	26.0686	18.7331	18.1212	16.8385	43.7729	34.5265	36.9486	21.6586	22.1142	28.3701	19.1122	18.6225	17.8236
VIT_00s0220g00070	Latex cyanogenic beta glucosidase	37.6845	33.8856	33.0502	209.458	264.869	200.573	45.7999	76.4607	67.8453	33.6954	26.8386	28.475	259.159	235.997	182.503	48.606	68.0632	52.0937	34.0239	35.4932	31.1633	263.428	278.125	226.107	50.5397	45.3926	73.929
VIT_00s2527g00010	Beta-fructosidase (BFRUCT3)	37.9414	39.1231	43.3091	33.9458	33.9329	22.9776	7.00757	7.32741	5.43293	45.8568	34.2726	40.2231	44.8167	35.7591	29.1173	6.58857	9.27878	5.33013	36.7168	31.3521	40.0015	46.8201	34.2426	29.296	7.53327	5.95517	6.87895
VIT_14s0108g00940	Glycogen synthase	38.1729	32.5027	44.2175	15.5617	15.7698	18.2976	16.2493	11.7066	10.9603	39.4017	26.8479	47.097	18.331	15.1173	15.1777	16.0393	12.6517	10.6057	33.0988	31.5403	47.4182	16.6315	14.381	16.701	15.1823	9.96623	12.4126
VIT_17s0000g04780	Phosphatidylinositol 4-kinase type-II	38.1978	39.5789	30.5887	38.8152	42.0583	31.238	76.1233	67.1212	69.3269	44.7344	42.852	41.2345	39.579	38.8763	36.1792	75.5449	65.9227	65.1622	37.4466	47.1304	33.6834	37.0709	36.437	30.1108	85.907	64.2276	64.6516
VIT_08s0007g03750	1,4-alpha-glucan branching enzyme IIB, chloroplast precursor	38.2746	43.7874	50.9711	56.4238	48.3665	48.7884	75.4581	69.2315	64.3193	36.578	43.5789	51.2807	55.9319	54.3509	58.8297	72.436	63.3471	52.1851	34.121	44.9166	55.2843	61.3188	57.9076	47.7167	80.0271	64.7373	52.7817
VIT_17s0000g08010	Trehalose 6-phosphate synthase	38.3015	45.344	23.8178	6.397	7.9832	8.85176	2.8133	3.39452	5.18192	36.0026	55.3866	30.9725	7.13509	9.48426	5.74609	2.89811	4.10089	6.41571	56.6772	35.665	28.5661	15.6175	7.24516	12.0639	3.82212	5.36951	6.19282
VIT_17s0053g00140	Serine/threonine-protein kinase Chk1	38.3765	32.2664	35.5464	54.4375	53.7025	48.652	55.3631	49.6411	48.1136	39.7333	33.3898	40.5017	57.5538	51.3692	48.822	57.5384	51.6483	50.4807	39.84	32.813	39.9823	57.7646	52.4322	51.0234	57.4115	49.2133	45.1937
VIT_06s0004g06020	Alpha-glucan phosphorylase, H isozyme	38.3838	42.181	41.0773	88.4112	78.1938	89.0579	97.5092	81.0192	61.7027	32.6934	42.5327	35.7562	88.1966	76.9267	108.614	101.861	75.1534	55.4865	29.9355	45.8321	35.5263	88.716	85.917	94.0627	101.711	72.8968	57.5153
VIT_00s0216g00020	Glycosyl transferase family 8 protein	38.6523	30.2159	80.9474	58.2508	64.6092	47.2651	38.5316	34.6415	31.7954	32.7906	30.2737	71.6811	56.4329	51.2215	56.928	40.6799	38.9811	32.2991	42.252	29.4111	89.9071	51.4353	57.3313	50.8862	33.89	32.0285	32.0857
VIT_18s0072g00770	fructose-1,6-bisphosphatase, cytosolic	38.9537	39.81	34.9648	27.0606	31.2998	31.0335	21.3619	22.1509	13.1469	41.112	39.5067	29.0024	34.2632	32.2115	22.3423	18.5632	17.7596	12.2187	42.4032	38.6253	36.3546	37.6621	35.6454	38.1902	20.5414	15.7722	14.8123
VIT_08s0007g08310	Alkaline alpha galactosidase	39.3491	21.6043	47.5502	1677.59	1572.95	1301.92	1513.36	1695.31	1421.41	34.2943	40.2668	40.8256	1662.42	1370.03	1262.44	1798.42	1688.87	1310.47	49.8848	27.7079	42.755	1435.28	1495.24	1299.1	1389.61	1226.92	1305.09
VIT_17s0000g10010	Callose synthase catalytic subunit	39.4796	39.1599	32.1792	27.7607	25.1136	36.5233	16.9659	19.2987	20.2117	38.9741	38.8394	34.9393	28.5475	26.586	34.6118	17.4943	19.5943	19.0768	45.3339	36.035	32.93	30.2613	29.2313	36.6498	17.3656	17.468	22.1056
VIT_05s0077g00280	Beta-amylase	39.6842	36.0579	122.439	580.238	560.832	435.688	299.129	253.597	239.4	36.8172	33.7782	52.5676	525.489	490.15	539.206	313.028	258.39	225.556	31.9949	31.0096	135.01	566.236	579.106	455.766	274.76	257.213	274.23
VIT_19s0014g03240	Beta-mannosidase 4	39.7528	34.7544	44.3428	2.57244	0.99519	4.4576	0.167061	0.20493	0.545946	39.4394	27.0727	43.0694	3.08804	2.25198	3.40179	0.178153	0.198533	0.752544	39.369	29.197	44.3192	3.47262	1.8798	5.53832	0.212983	0.283229	0.613023
VIT_07s0005g01970	Galactinol synthase	39.841	46.8925	2.91945	3.32246	1.35513	0.334758	1.43573	4.24847	12.3052	95.8249	32.1477	2.04834	2.10226	0.914218	0.858252	1.32606	4.86621	10.9397	26.7395	29.0474	2.63465	1.68832	1.17358	0.490212	1.41654	5.21482	15.4735
VIT_06s0004g04390	UDP-glucuronic acid decarboxylase 1	40.309	31.8916	52.1771	58.6907	56.3117	51.9914	76.719	79.2087	95.4837	31.9354	26.307	34.0554	53.1507	50.646	63.7996	81.1415	83.1433	109.161	37.402	30.797	49.391	53.889	52.9096	57.8731	77.5383	90.5665	99.7604
VIT_05s0077g00550	SFR2 (sensitive TO FREEZING 2)	40.5702	44.3905	31.1762	71.5468	70.6682	76.6441	67.8016	73.8013	84.6979	48.5231	39.9839	35.1335	67.5032	84.0813	61.7568	72.6632	72.898	87.7461	34.8817	47.1956	29.9419	85.6661	78.3666	63.4061	71.9847	77.0183	68.5654
VIT_15s0048g01300	Glycosyl transferase family 8 protein	41.11	39.4236	45.6405	36.2822	34.3259	41.4605	22.8669	23.2959	25.1391	41.6808	40.9741	49.1128	37.7648	41.8408	41.6496	23.8866	22.4003	27.1989	47.6819	37.3313	50.5779	40.5206	35.975	42.2449	22.258	22.4409	22.4574
VIT_01s0011g04630	Ribose 5-phosphate isomerase	41.1944	90.6693	101.09	30.0586	31.8433	50.6812	57.9747	63.4941	74.6237	25.0966	91.5554	33.2683	30.414	34.6666	51.5504	55.588	62.263	97.9479	56.0929	83.5107	71.5963	31.7817	36.201	44.2494	63.259	64.9446	86.3236
VIT_18s0001g00380	Alcohol dehydrogenase	41.2519	41.9797	29.868	7.73363	9.39437	8.27815	5.02507	6.19942	6.63542	42.6193	37.3054	33.578	8.53577	11.0232	9.2652	5.47962	6.60147	8.92151	36.7496	48.1044	30.5213	8.57219	8.95942	8.80818	4.6356	6.18698	7.34401
VIT_15s0021g00500	NADP-dependent malic enzyme	41.5654	37.9558	47.1104	53.4396	48.4742	56.2956	34.7983	33.915	34.6848	41.7395	35.9487	45.9782	56.5018	59.6038	46.4941	38.5336	34.9732	38.3509	42.6182	37.1617	50.1252	56.5398	52.6163	56.0048	33.2632	31.213	33.1004
VIT_03s0088g01190	Malate dehydrogenase, glyoxysomal precursor	41.631	39.2349	40.4567	8.26436	7.19749	11.9053	4.06226	4.50645	5.61478	48.7287	31.7012	27.1053	9.71093	5.68047	9.47731	3.23081	5.15037	3.56281	45.3189	44.2356	40.5996	6.7132	8.18775	11.1271	3.56963	4.12651	8.00941
VIT_02s0033g01410	Alpha-glucosidase 2	42.0392	46.0238	45.3968	18.1157	19.1225	22.0545	10.4383	11.039	11.9383	44.7493	51.8753	47.1515	19.5138	16.9549	19.1663	9.79025	9.16914	10.573	40.4944	51.9697	43.0376	20.1058	17.9683	22.5632	10.3096	9.14717	14.3934
VIT_02s0012g01170	Pyruvate kinase	42.0439	38.8285	51.1853	50.2754	51.9098	53.9239	50.6411	43.5139	41.8998	32.9824	34.5817	44.6554	47.9662	50.71	60.2505	50.3408	39.9022	40.5897	38.4734	37.625	48.6986	46.031	48.7964	56.2925	45.7402	39.7876	40.9236
VIT_10s0003g01680	Trehalose synthase	42.0455	43.5652	63.8829	39.2528	44.6601	49.1593	33.9796	37.612	34.218	37.8287	49.3637	57.3039	34.2043	45.7989	51.9495	32.37	35.4577	37.6707	46.9513	38.1989	66.8129	45.4767	43.7296	49.2842	34.9991	42.3824	38.1554
VIT_17s0000g06270	Malate dehydrogenase precursor	42.7647	34.0636	39.2533	34.0556	51.0375	33.6743	65.9653	77.9504	70.4243	36.0557	43.7012	43.941	41.4381	41.0054	39.1377	70.4132	83.3352	59.3202	43.6416	38.09	42.447	36.1875	48.6552	39.4848	79.6511	83.5447	73.9546
VIT_09s0002g01800	Dihydrolipoamide S-acetyltransferase	43.1636	42.4034	41.7493	83.0205	80.2968	79.6432	107.098	96.416	89.8501	41.6652	39.6857	41.5399	83.9305	93.4001	74.7179	109.291	94.5908	99.8339	45.1766	41.7418	43.257	91.0165	90.3575	82.4953	109.008	97.843	76.985
VIT_19s0015g00750	Sucrase	43.3463	55.414	61.5612	46.6066	47.0373	44.5049	82.1861	78.3683	73.9946	45.8575	52.0432	65.9054	53.2777	56.7057	49.3503	78.1165	77.7251	78.0675	40.2571	59.5741	61.9354	55.6071	45.2343	42.5522	81.9455	71.2475	63.5061
VIT_11s0016g03440	Lactoylglutathione lyase	43.5536	44.025	48.0048	37.9901	30.5641	40.9022	59.8096	56.3739	57.5671	42.7017	41.1474	48.188	35.9137	33.088	37.1953	58.0987	55.2188	52.8267	42.8294	44.6469	49.7899	35.434	31.786	40.2877	61.065	56.5491	49.5188
VIT_19s0014g01390	Phosphoenolpyruvate carboxylase	43.7047	40.4731	53.171	108.862	115.361	103.608	91.1591	74.1922	77.5388	42.0859	49.4628	51.8799	115.865	110.88	119.572	95.3007	77.819	77.304	43.1541	42.9323	54.8491	106.01	119.17	103.082	84.7883	72.8095	77.5451
VIT_15s0021g00460	Ribose-phosphate pyrophosphokinase 1	43.8951	48.4014	45.8787	22.3393	26.0493	28.3064	25.1014	25.1173	23.2523	42.5535	49.9253	53.1361	25.8955	22.9356	26.5635	24.1161	22.0243	22.5747	49.1641	58.7362	48.4957	27.419	22.6331	29.5693	26.1897	22.7329	22.5549
VIT_01s0011g00160	Alpha-1,4-glucan-protein synthase	44.0811	38.4258	89.9923	50.3136	63.6139	58.4596	124.145	113.787	105.877	33.8973	36.0058	75.2593	51.5756	60.613	75.0462	143.307	128.643	112.233	56.9707	38.0243	99.8152	46.3088	65.2307	57.2057	152.11	137.494	89.66
VIT_08s0032g00840	Sucrose-phosphatase.	44.3429	41.8282	40.3544	71.7883	77.6709	65.8383	171.298	180.5	150.636	42.9801	41.4306	36.8544	73.3056	67.3054	69.9464	178.656	175.935	120.88	37.0742	43.6014	37.7747	67.7715	86.4173	66.5126	180.333	190.043	140.691
VIT_02s0154g00050	Glycosyl hydrolase family 5	44.3704	54.9078	34.6177	22.7303	27.3998	25.0905	3.87182	9.54208	12.7151	50.6859	55.3153	42.4003	25.7132	24.6729	22.5532	4.36468	9.24101	9.68349	43.4164	61.7742	37.9716	28.8721	28.9647	29.1139	4.71035	7.16773	14.4044
VIT_16s0050g02180	Pyruvate kinase isozyme G, chloroplast precursor	44.9956	42.8911	36.3196	58.9062	57.1218	55.842	67.4016	75.3853	76.7967	45.6489	47.7868	38.7646	61.118	58.2235	57.9714	69.2304	74.5472	72.4871	46.5292	47.9079	36.6435	59.1779	59.7815	57.2759	74.3916	72.6821	75.5223
VIT_03s0063g02260	Phosphatidylinositol 4-kinase	45.089	42.7307	48.3113	53.9388	55.6104	61.6464	60.7584	62.7879	54.2138	40.2743	42.2702	50.6172	54.6968	55.365	58.2638	61.3833	56.8387	46.328	43.9172	42.3978	49.5089	58.148	58.3179	61.2474	61.5048	56.9165	50.9794
VIT_04s0023g02690	Beta-galactosidase	45.2183	24.7111	141.588	44.1209	59.1214	52.2748	2.93018	19.3315	15.1518	32.6647	25.4888	110.664	46.362	67.9809	64.6304	3.65769	13.7623	15.3143	57.9802	22.7535	164.385	42.6029	60.179	66.84	5.53195	14.9787	15.901
VIT_05s0094g00300	Chitinase class IV	45.2368	56.7607	35.3079	43.4804	56.5731	52.3666	3.69533	8.0797	6.7912	41.2188	58.4296	41.7001	45.5927	43.8156	50.8463	3.57889	5.86409	6.2127	50.4548	72.1183	42.3039	47.6672	48.1504	57.7319	3.88954	3.82831	12.4075
VIT_11s0016g00830	Ribose isomerase	45.4432	44.8049	46.4087	28.7055	29.7278	30.9309	43.6873	46.76	56.4077	43.4079	42.6825	46.9398	27.254	24.1139	29.1021	39.022	44.1924	49.1983	43.098	50.9154	46.263	26.5805	28.3894	29.5276	39.2142	49.3427	48.9914
VIT_18s0001g01640	UDP-sugar pyrophospharylase	45.5561	42.5186	36.2554	122.983	140.251	109.172	154.221	180.162	165.207	38.9378	41.7819	33.8989	118.5	139.14	120.814	150.402	163.097	143.851	39.4239	48.4912	31.8252	148.391	157.568	123.23	171.269	193.14	148.455
VIT_16s0039g01580	Carbohydrate kinase	45.9261	43.2018	43.176	76.1061	73.5101	55.8657	68.0368	64.0025	82.665	48.4358	39.8288	45.4874	73.2111	68.1101	58.4665	57.917	66.3444	81.7552	46.3777	47.1201	43.1509	75.1704	64.413	53.618	69.8012	67.3506	85.8816
VIT_03s0017g00680	UDP-d-apiose/udp-d-xylose synthase 1 AXS1	45.9958	42.8839	72.3982	91.1291	89.5675	101.7	36.7336	53.5954	45.526	40.8402	46.6555	58.5498	77.8844	87.4566	117.725	39.4345	55.0263	54.0427	45.7431	37.419	79.4799	93.4476	78.4727	108.217	36.2694	48.2944	58.1524
VIT_04s0043g00720	Transketolase	46.3698	40.3171	40.7799	47.7037	57.6146	52.1146	49.1192	40.2126	37.1793	43.0977	44.1294	44.5639	54.8357	44.1368	54.4359	48.6697	40.611	31.1296	51.0196	47.518	45.2759	45.4294	56.3957	52.7012	49.4487	36.4559	36.5038
VIT_01s0011g00250	6-phosphogluconolactonase	46.4384	41.0465	45.3128	45.5261	40.6428	46.9758	42.9286	34.597	36.9321	41.3195	34.5303	36.6366	45.9515	39.9086	38.6884	48.6597	34.2024	37.4301	34.0694	46.5489	43.3209	44.4995	45.9997	42.2059	39.521	35.3382	32.2671
VIT_14s0108g01560	Alpha-1,4 glucan phosphorylase, L isozyme, chloroplast precursor	46.7705	57.7213	46.2532	31.0263	26.0354	41.3024	21.752	14.7117	13.3928	48.9485	54.7395	46.5774	34.5496	31.6251	33.9674	21.8842	12.1929	13.4332	46.7428	63.9502	47.8407	41.4904	27.8197	45.8162	23.8678	10.2583	13.5458
VIT_08s0040g01700	Isocitrate dehydrogenase (NAD+) precursor	47.4893	42.0312	52.1879	81.1181	82.7055	70.7897	112.243	93.904	88.6004	46.368	39.6954	47.6334	78.7308	81.3548	77.6802	112.537	96.6956	91.1226	51.8052	37.0372	51.2017	77.5326	81.5615	77.7306	109.529	100.232	78.1894
VIT_18s0001g14230	Hexokinase	47.5888	42.1613	42.6733	20.6225	20.4293	22.9174	15.853	12.564	11.3778	47.4178	37.2999	42.9199	21.8328	18.7196	22.101	12.1736	10.2587	9.14786	46.907	43.6289	43.3442	22.2266	16.8663	23.1593	14.239	8.74116	12.0752
VIT_06s0004g06660	Phosphoinositide-specific phospholipase C	47.5915	29.3382	53.9543	20.4739	31.3092	19.4692	0.830345	5.88165	2.4738	27.9279	22.6574	41.3677	19.3612	29.6026	13.7198	1.15774	3.73705	3.12464	62.0265	25.9633	55.1747	28.8779	32.0714	29.0098	1.48273	2.96378	3.76997
VIT_19s0085g01150	Isocitrate dehydrogenase, chloroplast precursor	47.8886	47.4561	36.3957	43.8867	49.425	45.4186	53.3569	50.4485	40.7964	42.9636	44.3045	37.0151	44.4113	42.7076	42.0714	55.3309	43.7961	34.6283	43.0946	54.9857	35.4924	45.1059	52.8336	47.9553	53.8773	40.722	41.872
VIT_17s0000g06880	Heparanase protein 2 precursor	48.2145	48.7169	78.7133	24.6071	26.5004	35.1006	19.3062	14.1248	19.2563	62.4924	44.7281	76.8188	33.5655	30.2498	35.5266	22.1806	19.6474	20.9233	44.7059	49.1686	91.3321	32.2447	32.0564	43.6039	21.2149	20.8664	20.8436
VIT_07s0005g00880	fumarate hydratase	48.2195	46.9947	36.8712	33.1816	39.3437	34.2863	41.2349	33.9251	32.9101	43.5667	46.3546	46.7698	35.6409	38.4109	36.3117	44.0291	39.7825	34.2426	54.9306	52.5178	37.2482	37.9679	42.6123	38.4244	40.7626	42.6744	35.0715
VIT_08s0007g01030	Aldo/keto reductase	48.6857	43.2763	46.0292	76.0705	64.735	69.555	77.1897	71.5259	60.4721	45.1762	37.8599	42.6838	78.2159	69.9236	71.2099	80.3287	67.7073	59.3096	41.5975	46.8	44.2395	70.8547	80.1225	76.1441	71.7185	76.9834	60.0432
VIT_05s0020g04480	Pyruvate kinase	50.2735	50.7731	53.7598	42.2495	41.9949	39.3876	40.177	42.9991	41.1961	48.0382	57.82	56.4941	39.7429	40.6665	38.5159	38.7218	39.5558	39.1364	50.9195	55.6672	54.0303	38.1353	41.2006	37.0308	38.9251	37.2861	39.2356
VIT_05s0102g00710	fructokinase-1	50.4369	51.2078	33.6191	9.69119	25.6008	7.09919	12.6976	13.5998	17.0502	39.3144	49.0908	44.4768	14.8147	20.0379	11.151	13.5613	18.3883	15.6102	89.9012	52.4743	47.8664	12.3698	22.2248	6.17423	12.0256	24.6694	17.1073
VIT_07s0005g03790	Succinyl-CoA ligase beta-chain	50.6452	44.8878	45.3817	93.1796	104.195	89.0846	180.12	153.691	152.055	43.1419	40.8548	46.702	102.777	108.992	98.0113	187.64	159.617	152.699	52.4861	43.3742	45.4261	103.744	104.253	91.3102	188.737	158.175	133.035
VIT_17s0000g04750	UDP-glycosyltransferase 89B2	51.5136	93.2351	50.7502	81.8326	170.212	75.0681	111.14	212.421	114.42	40.7389	107.949	34.7964	69.154	135.311	112.252	93.2914	182.596	156.421	72.4344	83.7464	37.2472	133.241	121.087	76.0769	139.717	172.233	166.628
VIT_01s0026g00220	Aldehyde dehydrogenase 1 precursor	51.7636	42.2941	56.2692	310.417	345.264	194.081	201.043	125.801	129.984	33.9853	30.9215	46.346	342.89	337.165	199.314	213.364	129.952	124.874	69.0712	43.7972	68.2061	481.648	404.04	219.223	231.701	116.051	146.148
VIT_07s0005g03640	Asparagine N-glycosyltransferase	51.7849	48.5822	55.2189	74.429	73.859	64.2816	99.5989	82.974	72.9972	54.1263	52.7808	59.272	75.9613	77.8882	68.09	110.049	86.4298	74.8136	57.6505	47.0381	62.1125	75.1942	77.7725	73.1053	103.815	80.6877	67.1946
VIT_13s0019g04410	Oligosaccharyltransferase complex subunit alpha (ribophorin I)	51.9719	54.1308	43.0276	64.4212	73.0636	51.8991	73.1288	77.6123	76.451	51.0256	56.6893	52.4405	62.8804	68.7312	56.5282	76.8297	74.2218	78.7882	58.7774	52.8236	45.7402	68.952	70.3805	53.6996	75.6096	73.0571	78.9588
VIT_13s0019g00510	2-oxoglutarate dehydrogenase E1 component	52.0323	44.9097	64.1032	83.4915	79.4445	76.8876	124.614	113.377	117.225	47.0852	43.9409	65.4293	77.0916	84.3366	84.3843	124.076	121.542	126.37	52.8155	41.4148	65.7674	80.5361	77.4245	75.1737	122.506	122.549	100.206
VIT_15s0046g03670	NADP-dependent malic enzyme	52.4841	46.5544	40.1572	28.2183	27.6473	32.4611	18.7696	17.0293	17.0634	48.023	44.1617	44.2578	28.8416	26.2971	33.0754	18.0839	17.6261	17.05	51.8907	45.8462	41.7667	26.8554	27.225	32.4002	17.8038	17.5202	18.0255
VIT_06s0004g01270	Callose synthase catalytic subunit	52.7273	48.709	50.2692	106.459	89.2223	132.078	47.8055	42.7675	42.3273	54.326	45.6942	45.0902	100.317	106.691	114.301	51.751	40.3183	43.8989	46.1822	45.1251	45.959	112.618	101.519	134.084	43.299	35.6074	45.8826
VIT_05s0020g03550	Lactoylglutathione lyase	52.8572	49.1713	55.8051	93.4187	87.9243	96.5178	40.8091	45.8266	54.1919	59.0835	51.5766	53.3642	83.9426	77.1144	85.0541	40.1037	41.3528	53.2171	49.9601	66.8752	56.9176	97.1554	84.2866	94.1932	42.2378	42.5136	58.6272
VIT_08s0007g01570	fructose 1,6-bisphosphatase	53.2704	44.0405	71.8212	11.4593	9.18672	13.6895	3.21612	4.36277	3.4976	57.756	37.9578	60.5353	16.3639	10.4584	10.2147	2.76528	4.20091	3.1805	58.1274	46.911	82.5133	12.693	9.81556	12.9886	3.59576	3.53857	5.075
VIT_10s0116g01660	Lactoylglutathione lyase	53.498	49.3456	65.4068	58.5893	29.5674	64.1828	76.4404	73.5741	109.411	43.737	35.7247	37.5942	39.0034	32.8051	67.372	68.7898	92.7937	103.094	46.67	50.3407	77.3099	30.2541	32.1503	38.872	57.1301	95.3949	102.137
VIT_11s0052g00660	Aldose 1-epimerase	53.9413	47.9578	46.8377	62.3047	57.4231	64.0112	53.8819	51.1255	56.3298	51.2321	44.2006	44.8229	59.4192	60.9409	55.4765	51.5975	47.9364	56.0677	46.6525	52.533	48.2313	67.8854	53.6265	62.2497	50.9205	49.3081	50.8108
VIT_18s0001g08310	Inositol 1,3,4-trisphosphate 5/6-kinase	54.0756	32.9873	150.909	80.0831	83.5325	82.5529	36.8218	59.5129	36.9846	54.4859	29.9152	79.5513	109.881	76.9805	79.7004	39.63	54.5152	32.1193	67.6118	28.3326	128.391	80.1813	98.1112	95.5722	38.0409	45.2503	51.4986
VIT_07s0005g00490	UDP-glucuronic acid decarboxylase 1	54.6253	46.7835	59.9388	125.925	174.675	81.6602	124.606	176.107	223.696	48.5282	56.3609	63.7941	138.132	153.408	123.092	130.576	177.35	262.608	66.3491	48.0956	58.0674	136.496	151.381	88.5261	129.492	186.362	226.399
VIT_00s0984g00010	Phosphoglycerate mutase	54.9002	47.1011	49.0432	89.0537	110.063	80.8976	120.051	113.601	109.027	53.3866	51.4913	59.8833	88.0613	99.5224	77.2042	126.451	122.714	114.513	52.6377	69.4277	54.8708	89.8707	105.937	85.854	132.813	128.447	117.347
VIT_06s0080g00420	Glucan endo-1,3-beta-glucosidase 7 precursor	55.1057	41.4912	71.6422	1.21869	1.53644	1.42172	0.0170384	0.31284	0.637677	43.9763	41.8206	63.4954	1.30369	1.54997	0.74846	0.218804	0.425808	0.519852	60.0298	39.2928	93.1955	2.29821	1.52588	1.63022	0.235845	0.582931	0.498768
VIT_15s0046g01190	Hydroquinone glucosyltransferase	55.8804	55.6057	53.4289	25.0498	35.8468	25.5879	7.78354	9.71239	14.1985	53.1762	51.6143	42.2435	24.8059	42.1772	38.7099	7.53359	15.4306	20.3637	57.3659	57.2356	52.8283	24.8676	39.6395	31.4029	7.13287	22.7702	16.8072
VIT_19s0014g02840	3-deoxy-manno-octulosonate cytidylyltransferase	55.9211	49.407	58.6455	96.278	99.9408	85.7308	98.2458	93.5382	69.9934	50.4989	45.4945	57.0184	90.498	78.1976	85.4615	89.9801	76.0073	56.4554	53.6007	49.7634	61.2306	96.0875	93.7131	91.3009	99.4614	68.9798	73.0705
VIT_09s0018g01940	Pyruvate dehydrogenase E1 component alpha subunit	56.0705	50.9313	46.0402	114.442	116.494	98.3352	201.298	174.513	167.95	45.5004	44.4112	47.2563	110.356	119.756	100.906	183.982	171.4	177.38	55.1111	56.7675	45.0717	113.275	113.567	98.5336	193.255	173.074	141.917
VIT_14s0171g00130	Ribulose-phosphate 3-epimerase	56.3824	43.6945	43.694	29.0479	36.0864	28.774	24.6284	21.0823	18.7128	42.3641	35.4564	44.3771	34.1769	29.6781	30.7348	22.4815	21.635	14.7518	56.864	46.2114	45.3942	30.4706	39.6542	31.9403	24.3463	21.1009	21.9312
VIT_02s0154g00350	L-lactate dehydrogenase A	56.8808	65.2771	32.5567	10.6593	20.9805	8.66743	1.66808	3.75754	3.61677	35.8832	41.0915	46.0182	10.0746	14.6989	7.18093	2.22164	4.17204	3.76069	68.5592	54.9564	36.7291	10.196	14.3317	7.87262	1.59432	5.6767	4.1161
VIT_03s0091g00810	Beta-1,4-xylosidase	57.3816	92.3625	24.9355	20.7026	75.0323	8.72992	10.2312	27.7357	10.2096	28.8626	53.0137	20.334	27.3681	57.5838	11.9579	7.27957	26.6721	17.1371	158.753	57.0874	26.0422	57.088	64.5008	10.3017	11.5366	39.908	18.8366
VIT_00s0371g00100	Mannitol dehydrogenase	57.4115	98.4803	35.5639	3.48891	3.64687	3.81279	0.669606	1.05629	0.858689	75.6607	127.823	69.4371	4.3444	4.20124	2.80187	0.721222	0.81164	1.072	54.9857	122.689	50.8142	6.96959	3.3307	5.81023	1.01608	1.01896	1.0644
VIT_02s0154g00090	Vacuolar invertase 2, GIN2	57.9477	54.6712	69.8187	56.6986	49.5921	43.3788	9.62905	11.9162	10.2099	68.5353	52.0812	67.034	72.466	58.8983	51.9658	12.2543	13.7521	11.2528	59.2109	45.2466	66.2189	79.4464	53.1685	47.0788	12.6812	8.82919	9.65552
VIT_14s0030g01900	Ribose-5-phosphate isomerase	58.0804	48.8967	62.1934	59.3676	66.502	47.8407	27.0097	23.3091	22.9143	49.1869	41.9518	49.5092	69.3948	61.6095	52.8845	22.63	23.9294	25.88	54.8461	47.6595	60.672	62.2185	60.8654	44.7574	22.3475	19.1489	28.6752
VIT_17s0000g02260	Aldose 1-epimerase	58.5742	59.8956	61.571	66.8826	77.1171	78.4564	45.5652	39.0825	33.9241	53.1196	69.3706	49.0183	70.8337	55.8371	57.4004	45.2193	36.6209	38.7267	50.3207	69.1002	69.943	93.8952	67.8672	97.2874	51.3566	32.7364	42.6985
VIT_18s0122g00140	Lipid-A-disaccharide synthase (LpxB)	58.5964	58.3824	77.5635	60.9419	54.1639	67.1033	27.6302	27.2178	25.7152	53.9607	55.922	83.9791	54.9931	64.926	69.7147	27.1012	24.117	29.6001	61.5407	58.4963	86.7424	64.4482	53.0896	67.3191	29.3784	21.0354	24.3884
VIT_11s0118g00200	Sucrose-phosphate synthase	62.1343	61.2188	55.3814	510.995	465.219	323.557	305.264	467.281	537.221	56.7759	58.2166	53.1173	469.496	500.911	331.504	319.749	403.912	450.965	50.241	67.848	51.8389	591.718	518.276	316.029	325.97	382.888	503.265
VIT_02s0025g01580	UDP-glucose 4-epimerase GEPI48	62.6386	66.8158	100.687	256.086	281.911	244.5	274.254	202.458	169.568	74.2866	66.5983	78.4564	307.527	296.862	267.888	309.523	209.106	149.668	49.0884	80.2706	89.9271	284.003	328.545	261.484	286.324	200.029	152.457
VIT_05s0049g00950	Phosphoenolpyruvate carboxylase kinase	63.1813	44.2319	69.8952	34.7441	22.5814	42.8572	65.5653	46.4064	59.5743	63.2866	39.8279	68.9673	33.2325	24.8782	37.8784	64.8782	52.2905	45.2946	39.1246	30.0912	41.1595	18.691	22.6524	27.4021	29.9047	40.4781	25.4441
VIT_14s0219g00150	Succinate dehydrogenase iron-protein subunit	64.2071	53.9262	67.7251	188.885	192.984	134.223	217.097	193.011	207.163	51.9251	47.3433	61.788	182.726	178.941	167.762	212.366	217.918	212.102	58.9362	53.7037	63.6432	163.137	184.344	106.123	188.548	216.465	185.239
VIT_05s0077g00690	Galactokinase (GAL1)	64.86	54.5631	57.0022	145.554	117.799	134.459	242.16	192.197	249.102	63.7178	40.8313	46.6238	128.904	114.14	178.046	231.47	199.777	218.385	52.2759	46.3318	55.9909	133.453	130.319	118.327	211.782	175.793	216.73
VIT_07s0031g02630	Aldehyde dehydrogenase	65.7215	63.7534	73.6675	60.7875	71.5422	58.1697	71.1379	95.2154	77.8259	64.0535	67.3376	71.5332	66.7039	77.6881	65.2421	68.5284	97.5627	70.1521	68.1919	68.7268	72.7688	85.415	81.878	59.641	97.5	112.484	81.4773
VIT_05s0020g00380	Dihydrolipoyl dehydrogenase	65.748	57.3851	72.2462	146.568	142.131	126.1	156.714	144.262	154.984	59.019	58.6795	71.7857	136.02	152.294	133.567	150.303	138.054	155.023	67.5613	59.9983	74.5768	145.505	141.795	116.207	151.961	147.961	139.46
VIT_04s0043g00760	UDP-N-acetylglucosamine--peptide N-acetylglucosaminyltransferase SEC	65.763	64.2334	68.8149	113.853	102.311	112.349	175.365	164.652	162.567	63.862	62.1615	60.4099	118.826	116.083	110.615	181.692	172.552	158.412	66.7119	59.3306	64.48	118.729	114.328	106.808	174.882	183.928	137.633
VIT_14s0068g01760	Alcohol dehydrogenase	65.9502	50.2059	12.7221	67.8856	124.59	31.3762	85.375	180.266	201.813	28.8897	40.4906	19.8149	54.0187	148.303	45.5183	87.8946	152.633	222.768	134.997	26.8423	12.6283	114.126	125.34	31.4646	104.793	207.388	202.265
VIT_08s0040g02710	UDP-glucuronic acid decarboxylase 1	66.0401	48.661	94.002	86.6492	75.8126	91.8178	37.8367	35.0561	34.5883	46.6948	33.638	83.1256	85.9302	85.757	91.0958	40.4156	36.6619	34.3821	57.2449	47.4465	98.5973	79.2703	90.8559	91.129	37.6715	35.3842	33.9289
VIT_18s0122g00890	Oligosaccharyltransferase complex subunit alpha (ribophorin I)	66.9771	58.7746	58.8957	75.7565	80.0476	67.7277	104.504	81.636	75.1258	59.2501	57.5215	63.0188	83.5667	73.6291	70.0627	111.068	85.4494	67.9328	69.0517	61.2567	61.0045	73.0892	82.9129	78.9687	109.736	86.6783	71.358
VIT_10s0116g00360	Pyrophosphate-dependent phosphofructokinase beta subunit	67.443	74.7376	44.8651	77.8191	83.0067	70.0847	86.6072	88.7655	90.9552	80.5905	120.313	56.3052	78.5713	92.3223	69.4463	87.7687	91.4597	90.4242	65.3053	83.5662	47.6893	85.1297	85.2734	67.4098	86.0624	91.2376	85.1464
VIT_17s0000g07260	Glucan endo-1,3-beta-glucosidase 3 precursor	67.5893	54.2165	87.3154	47.6942	37.338	56.2413	135.921	136.409	125.146	73.3727	47.7115	70.2317	46.9284	36.3175	54.0148	116.119	124.83	112.126	62.635	55.4868	88.5553	37.646	34.3511	52.2423	138.226	134.871	100.391
VIT_11s0037g00930	GDP-L-fucose synthase.	68.0074	60.0695	67.336	48.7277	44.5757	55.431	17.2326	14.5191	15.1493	57.2947	50.2743	59.5738	46.436	48.0467	48.8009	17.5144	13.8149	19.0975	61.5055	69.5904	69.2562	47.1461	37.909	50.5956	13.4142	8.94748	15.7983
VIT_18s0001g07280	Glucose-6-phosphate isomerase	68.3603	66.7029	65.7931	80.0802	92.0222	79.971	87.7864	95.885	91.667	62.5249	67.6574	67.7868	84.2992	87.143	74.0343	85.8612	86.5017	84.482	73.0431	80.9203	66.7327	96.4037	90.5594	83.0083	97.1172	94.3263	76.1313
VIT_18s0001g05180	Beta-D-xylosidase	70.0448	62.0069	64.883	10.3353	11.5995	7.33099	0.33428	0.541254	0.639898	61.7607	50.6537	63.3416	11.5945	12.3363	6.25851	0.487411	0.742832	1.52689	67.7182	63.222	69.3441	12.2569	11.3535	9.28532	0.457726	0.386851	1.23965
VIT_10s0116g01480	2-oxoglutarate dehydrogenase E2 subunit	70.2099	66.3473	63.5299	105.953	111.36	98.5383	162.503	149.794	127.331	61.75	62.1382	72.5163	104.781	105.777	98.7608	173.01	150.485	118.649	68.9177	60.4565	63.6371	104.464	111.555	101.255	171.744	141.981	116.683
VIT_01s0026g01660	Alpha-amylase isozyme C2 precursor	70.4676	105.512	27.1417	38.6902	52.6667	38.7613	61.0786	37.3794	32.5481	70.2508	122.354	54.2919	42.5142	54.0782	43.1925	58.1269	43.4771	37.5923	78.8337	118.843	32.3841	67.1596	49.2348	36.3107	72.1264	43.2119	39.2935
VIT_02s0025g02770	Glucan endo-1,3-beta-glucosidase 7 precursor	71.3672	72.1824	105.597	80.4506	80.581	100.293	14.6338	34.1053	36.2256	76.5141	63.6076	73.065	84.4199	74.1728	109.409	18.9372	38.092	42.8217	64.3948	88.1401	99.0642	65.5965	82.3542	98.9447	12.4267	29.9496	43.158
VIT_14s0036g00370	Serine/threonine-protein phosphatase PP1	71.4413	75.0509	67.1929	69.4969	68.886	63.3811	31.3432	41.5022	40.1724	70.4165	77.8939	69.3271	62.9289	66.7151	56.6835	30.7614	35.636	41.391	72.0701	68.7195	73.2943	76.9217	57.9093	64.3044	34.0829	32.4302	38.3664
VIT_18s0001g12370	Glucose-6-phosphate isomerase, cytosolic (PGIC)	73.0794	75.3908	68.068	62.5163	64.283	72.5152	51.4325	52.9937	42.6901	77.7772	77.7859	66.2634	64.8226	63.0333	61.3467	50.9653	46.2091	38.7353	65.2631	86.4853	67.6369	68.9257	65.4384	76.1799	49.0716	39.9531	43.2847
VIT_02s0025g02790	Starch synthase	73.3696	78.7357	71.5006	101.311	95.9221	82.0626	177.224	154.12	138.627	76.9948	86.6988	83.5339	116.403	98.6991	83.5331	193.885	161.155	120.31	73.6505	94.9805	76.3338	92.9787	94.879	81.5019	162.034	145.784	119.184
VIT_05s0077g00510	Beta-fructofuranosidase	73.3911	86.9914	70.9508	27.0737	37.8656	24.9819	15.5863	17.8124	21.1118	71.2745	101.062	52.9514	25.8426	41.122	19.7483	14.5671	17.7756	26.1426	108.292	71.7808	71.8931	54.75	37.269	25.1114	19.3307	24.9694	22.8292
VIT_16s0098g01200	6-phosphogluconolactonase	74.3162	68.1877	76.6562	120.472	117.725	99.964	204.615	226.223	220.67	70.3885	69.4243	68.0592	119.895	107.797	111.455	220.645	236.49	221.541	66.056	78.6191	72.453	112.717	111.422	112.581	221.226	238.388	217.013
VIT_13s0019g05250	Malate dehydrogenase [NADP], chloroplast precursor (NADP-MDH)	74.6963	66.2963	87.2904	71.7792	64.6468	63.382	62.0409	68.1925	67.1638	69.3939	51.3256	68.3131	82.1448	64.781	60.5232	61.0831	71.1165	60.5396	71.2326	63.0179	84.9955	77.2649	61.9617	63.3985	62.0998	61.4069	66.358
VIT_18s0001g00060	1,4-alpha-glucan branching enzyme, chloroplast precursor	75.1848	81.582	68.9649	56.4585	50.243	52.7646	72.4812	58.6381	58.0847	76.1077	83.2277	68.2539	60.9248	51.6379	49.259	67.8372	64.7706	54.7555	74.434	91.8505	71.0307	64.376	48.5619	56.5971	69.4892	66.7518	50.9289
VIT_11s0016g01820	Lactoylglutathione lyase	75.9977	77.327	63.4843	77.2714	72.1196	69.0297	72.7831	73.4889	61.875	74.801	72.618	53.8835	78.2737	69.1811	55.8416	61.9936	58.3041	56.1354	78.5506	87.6836	68.0733	80.5307	71.1376	68.3418	70.4967	56.7075	58.2372
VIT_04s0044g01120	Alcohol dehydrogenase 2 [Vitis vinifera]	76.4584	88.6063	0.364197	21.3743	39.5894	15.247	2.32179	12.8327	23.8359	46.7576	110.663	18.3067	23.5933	56.4028	16.927	4.77957	17.1837	30.13	151.884	90.2887	1.01198	31.7459	47.5029	7.51087	3.20957	28.1541	26.9814
VIT_04s0023g01650	Succinate dehydrogenase flavoprotein subunit,precursor	76.7698	76.1704	70.5108	161.06	131.072	137.337	153.533	134.125	155.223	77.1333	76.6019	72.6539	152.091	160.38	141.78	158.586	161.245	170.077	70.4269	79.3827	68.8659	150.587	147.169	123.003	131.408	159.948	135.481
VIT_05s0020g00760	Pyruvate dehydrogenase kinase, Mitochondrial	77.0036	73.4287	112.916	119.028	121.606	111.612	145.98	136.405	121.56	70.1003	65.9282	95.0068	123.792	96.5012	89.1136	133.686	115.748	84.5265	65.8123	74.3562	107.987	118.428	118.489	111.664	151.573	123.002	120.606
VIT_06s0004g04800	Triosephosphate isomerase, cytosolic	77.4964	76.199	78.0559	59.1056	64.646	65.278	64.2119	66.7085	55.8282	81.8596	91.5028	80.835	64.538	66.2618	53.6501	67.5285	56.1111	53.265	75.6402	83.3038	83.4076	68.1564	66.6787	71.9218	66.6978	58.8865	51.0933
VIT_00s0264g00030	Aconitate hydratase, cytoplasmic	77.5786	94.2944	71.5769	50.5287	59.3013	52.4685	72.5139	76.4982	70.2607	80.6879	100.559	82.1643	52.3597	58.0911	52.6165	78.9644	81.2005	73.0407	75.431	106.053	76.2702	58.0355	60.3593	57.0406	79.1192	92.9443	69.3673
VIT_03s0038g00800	NADP-dependent D-sorbitol-6-phosphate dehydrogenase	78.7645	74.1571	71.8202	76.138	75.3568	77.5697	51.0351	66.7781	66.2712	77.512	68.9446	69.3938	70.568	64.6622	67.3135	52.902	56.8758	61.7505	73.0019	86.71	69.0545	70.2682	76.0599	74.8309	48.6617	49.8704	66.1258
VIT_03s0038g01780	Triosephosphate isomerase, chloroplast precursor	79.0842	86.4323	55.1285	40.5009	57.7001	49.8137	43.2757	41.2077	33.8881	87.9198	84.0903	68.4398	51.65	48.9626	42.9987	43.4401	39.2109	29.5528	85.138	87.1573	58.3786	49.8682	51.3642	50.8485	49.8322	36.9883	41.4733
VIT_01s0146g00310	Pyruvate dehydrogenase E1 component subunit beta	80.5198	78.4029	74.059	149.383	180.785	142.429	275.485	229.621	197.197	73.4823	75.9685	81.2591	155.523	158.36	144.555	267.944	223.086	169.015	83.1879	95.6063	74.6052	149.088	185.634	138.718	283.477	235.011	177.256
VIT_12s0059g01320	Glucan endo-1,3-beta-glucosidase 7 precursor	80.6816	64.5143	38.8039	67.8623	88.0665	38.2864	53.8881	52.1325	54.6486	76.4504	51.635	35.1068	78.5019	79.3328	44.4831	58.3386	51.28	58.0853	70.4555	58.9175	33.5167	80.4096	60.1818	40.2887	51.89	28.8882	53.9169
VIT_12s0142g00610	Citrate synthase, glyoxysomal precursor	82.0907	76.0537	72.2241	118.608	126.844	105.878	168.66	173.999	185.465	72.2385	76.0088	77.2874	129.734	155.055	92.8665	177.362	201.393	209.746	85.0335	78.6228	75.1934	169.214	133.549	114.304	176.79	250.877	140.3
VIT_08s0007g01040	Aldo-keto reductase	83.3894	101.417	76.5047	9.45152	8.30413	11.4681	1.65123	1.72671	1.99656	98.221	101.493	78.8936	12.9692	7.97612	7.59609	1.95981	2.29989	3.06241	81.0672	122.479	87.5817	14.1115	7.48001	14.6924	1.2824	1.79228	2.16493
VIT_15s0048g02580	Pyruvate dehydrogenase E1 component alpha subunit	83.504	71.8959	105.739	109.618	99.2048	121.238	131.641	99.8118	95.8942	77.7424	70.0781	97.0639	112.485	98.8349	125.97	115.583	99.5192	98.119	80.1937	74.4568	111.873	109.709	96.6365	114.314	120.159	93.39	92.6326
VIT_00s0780g00010	6-phosphofructokinase 2	83.9518	89.5024	53.6845	94.3668	99.965	76.5273	90.1805	131.594	136.805	81.076	84.6678	53.9874	89.4767	86.4927	77.1114	94.6673	119.905	132.552	74.5953	109.072	52.7192	93.5686	89.7574	75.3642	89.6494	121.315	121.403
VIT_19s0090g00460	Aconitate hydratase, cytoplasmic	85.0363	86.9083	88.5125	199.125	193.244	155.989	212.918	180.989	167.099	83.8886	93.2798	100.13	210.902	193.903	154.739	221.61	181.734	160.683	84.2343	90.4576	87.7666	217.248	203.508	160.691	224.908	178.427	160.02
VIT_15s0046g03520	Phosphomannomutase	85.8477	64.4905	72.6514	87.6813	80.6	87.8139	24.8662	26.7103	29.2304	75.0189	54.5186	75.7601	97.4764	93.3356	80.1654	30.9027	26.0382	34.4458	87.2757	53.5734	82.2572	95.239	92.6892	95.5045	23.5524	23.8658	31.601
VIT_08s0056g00190	Pyruvate kinase	88.4577	95.9007	84.5778	87.3018	131.237	69.6215	169.815	153.186	135.828	84.7284	102.382	99.2	93.2746	113.831	74.9577	167.356	159.359	116.346	90.8283	114.86	93.524	89.3497	121.65	71.6499	168.989	181.625	125.997
VIT_00s2563g00010	Glycogenin glucosyltransferase	90.5552	104.907	132.054	61.1937	90.8618	64.189	12.1523	29.9206	15.0091	51.8712	117.753	89.1342	62.3882	89.7388	62.4474	12.0527	25.8553	19.68	123.881	109.882	122.919	72.3216	100.329	63.3126	11.3786	30.9314	25.1625
VIT_01s0011g02740	Phosphoenolpyruvate carboxylase	91.7299	81.4909	113.579	32.8941	25.0119	36.0995	17.6405	15.6361	14.4421	90.4533	85.313	109.017	36.081	28.2719	24.9812	22.0699	17.4041	16.0086	77.9012	80.9386	116.918	33.235	29.488	38.6705	14.72	14.2307	13.0451
VIT_18s0001g12830	1,4-beta-mannan endohydrolase	92.2389	68.449	131.655	2676.18	2374.63	1749.37	885.774	1162.75	931.598	85.4463	66.3473	119.467	2411.2	2453.33	1439.22	1127.24	1073.47	1011.78	62.3286	85.3527	131.792	2578.89	2278.89	1664.06	930.721	769.266	962.819
VIT_11s0052g01710	Xylose isomerase	94.1262	95.5671	66.7746	199.405	162.447	185.117	112.333	95.7747	80.7585	95.5167	83.5152	60.5577	203.336	151.73	142.397	109.973	89.0244	78.7435	82.0345	96.4427	70.6969	216.802	169.665	203.427	113.885	75.5084	93.7945
VIT_04s0023g03170	GDP-D-mannose-4,6-dehydratase (MUR1)	97.9073	53.1849	166.098	255.694	288.779	314.26	87.7761	108.215	99.2387	47.8662	52.3855	130.007	226.729	240.135	538.435	85.7798	108.633	111.523	120.846	52.0816	172.299	212.383	260.718	315.382	80.6304	91.4271	121.531
VIT_10s0003g03180	Phospho-N-acetylmuramoyl-pentapeptide-transferase	99.041	91.0773	97.2088	48.3724	57.3497	49.448	42.7317	53.3007	44.2645	86.5822	94.6193	97.5832	51.3336	48.9626	49.63	44.599	45.7015	40.8916	92.7858	110.162	99.0449	51.4469	53.1071	52.6878	48.2903	44.2577	51.2224
VIT_04s0008g00180	NADP-dependent malic enzyme	99.5144	77.5363	20.9139	35.1229	87.0352	28.3475	1.17924	7.23438	4.05028	57.972	64.2209	30.3908	48.4927	111.013	27.3997	2.61337	7.1651	6.91049	170.766	50.2345	18.9899	79.6904	86.6604	35.1771	2.22275	10.0762	9.07313
VIT_13s0156g00180	Citrate synthase 4	99.5691	86.5373	76.3833	125.371	132.134	118.513	195.9	169.778	176.618	88.5948	92.1366	90.1615	131.342	140.856	118.511	205.589	191.139	169.476	106.711	91.0064	77.7752	135.013	141.915	124.913	202.237	195.14	151.986
VIT_11s0016g03100	6-phosphogluconate dehydrogenase	103.122	97.0114	96.7793	170.471	192.826	146.026	164.324	169.611	148.035	94.1561	109.075	96.9594	152.938	149.991	168.876	151.251	141.376	140.386	84.3262	126.435	91.9501	162.249	155.467	146.545	156.101	112.083	167.078
VIT_02s0025g00480	Serine/threonine-protein phosphatase PP1	105.635	90.3915	85.5982	80.0303	99.2785	68.5844	85.6381	97.1522	85.526	76.6585	91.6258	77.7619	78.6333	92.3163	67.686	85.8398	90.2541	76.0078	111.04	95.276	85.055	96.3463	95.1977	72.1966	93.5949	88.8957	104.214
VIT_17s0000g07640	Mannose-1-phosphate guanyltransferase	107.435	83.2531	63.4422	39.3197	38.0475	47.3875	7.43698	12.1579	11.142	94.6336	69.4061	55.6078	42.9314	36.4555	33.1394	7.14689	10.0896	9.89581	104.161	84.4386	60.8343	47.1778	39.2185	56.4214	7.81395	9.8879	13.4868
VIT_13s0067g00900	Phosphoinositide-specific phospholipase C	109.763	113.115	108.406	109.145	78.8416	109.424	96.4155	87.6376	91.1303	113.768	104.679	113.403	96.5804	94.5023	87.2232	91.6934	80.2388	90.9785	95.6319	103.209	109.104	112.86	79.5411	106.59	82.6374	83.797	77.7542
VIT_01s0011g00570	Glucan endo-1,3-beta-glucosidase 3 precursor	109.961	97.4478	119.996	187.948	171.616	180.71	256.334	178.839	143.073	104.588	94.6094	134.744	212.203	152.944	200.528	250.332	184.458	129.45	103.748	107.488	117.755	148.297	198.977	168.569	230.331	161.345	143.686
VIT_03s0063g02490	Glucan endo-1,3-beta-glucosidase 7 precursor	110.114	106.868	81.2413	73.2209	109.587	61.4326	20.3952	32.1006	23.0016	145.281	124.807	73.4244	99.0209	104.391	77.9924	28.6363	30.8901	30.5292	100.526	113.096	80.8499	96.6661	93.8739	71.6724	24.4339	17.7069	31.0723
VIT_14s0006g02820	Mannose-6-phosphate isomerase	111.131	73.9628	72.6292	93.7777	144.029	68.7203	80.7443	101.401	101.114	81.0814	100.678	92.7063	85.1125	104.455	75.0341	72.6479	74.1634	72.242	105.779	110.796	60.3367	114.199	130.991	85.753	90.1002	80.5464	104.057
VIT_14s0171g00490	Glucose-6-phosphate 1-dehydrogenase, cytoplasmic isoform	111.321	126.383	74.062	65.5515	80.9292	65.0488	121.639	104.576	99.3172	91.7199	121.874	88.8043	65.8955	79.3396	64.7625	124.438	110.815	101.895	109.076	111.332	75.9191	75.521	73.7995	68.8505	130.986	118.191	92.3963
VIT_10s0003g01000	Malate dehydrogenase	113.368	116.086	100.899	181.473	222.385	166.634	216.722	206.98	207.132	117.735	129.541	105.142	201.34	197.779	173.826	234.582	211.31	213.886	128.963	135.505	106.264	181.515	214.774	173.702	213.702	206.495	203.585
VIT_11s0016g00900	Aldehyde dehydrogenase 7 member A1	114.502	101.568	131.542	120.932	129.467	129.583	184.26	159.45	131.538	118.373	97.7327	124.542	127.45	123.664	103.702	181.64	147.633	125.267	96.6126	100.47	126.828	156.404	117.868	126.69	188.799	142.134	124.058
VIT_14s0066g00410	Aldose 1-epimerase	119.35	136.017	156.851	86.4537	88.3786	94.9027	80.7376	89.6039	56.4375	116.638	134.992	151.631	94.2591	82.1142	69.2668	66.4958	57.8468	48.1064	97.8692	192.552	149.875	100.352	87.4342	93.3865	76.6852	59.5592	62.5698
VIT_19s0085g00380	Phosphoglycerate kinase	124.578	98.1826	116.93	43.2275	50.9351	45.5289	31.7817	32.5886	30.1989	112.08	74.5756	95.4202	56.4949	39.2106	39.753	29.6278	33.0541	24.5685	129.932	98.0579	116.706	45.8688	44.548	46.8311	32.492	24.9801	35.4588
VIT_05s0020g01910	1,4-alpha-D-glucan maltohydrolase	124.662	115.442	292.774	480.235	488.002	385.089	376.761	357.142	362.594	104.405	103.538	133.937	463.122	375.626	428.593	357.83	330.37	287.463	165.17	100.875	288.507	486.178	506.146	386.369	378.236	359.255	338.58
VIT_00s1274g00010	Phosphosulfolactate synthase protein	125.256	130.95	74.2426	62.0556	38.1608	57.0076	22.4924	33.2402	47.1559	122.12	108.537	60.4226	44.143	38.9312	45.2789	21.0305	26.4549	48.0968	92.9577	113.717	70.939	58.8059	39.2431	54.4853	22.0357	26.574	43.6022
VIT_16s0022g01440	Transketolase, chloroplast precursor	128.094	144.333	102.714	276.12	406.012	244.05	249.294	270.747	232.058	126.065	150.077	99.2082	309.055	346.548	272.97	277.295	273.496	230.302	122.221	162.717	104.032	324.595	350.794	253.915	290.979	249.216	260.928
VIT_03s0063g02100	Dolichyl-diphosphooligosaccharide-protein glycosyltransferase 48kDa	129.307	129.109	107.844	147.434	148.353	129.922	136.74	162.441	158.353	130.872	129.488	110.649	139.48	136.229	122.403	138.923	143.295	151.143	129.252	136.257	113.832	153.563	144.074	143.629	147.668	136.622	159.843
VIT_01s0010g01130	6-phosphogluconate dehydrogenase	129.851	120.166	87.7451	171.108	178.351	149.821	191.957	203.614	205.738	97.469	119.755	91.521	150.306	182.979	166.486	206.41	218.255	219.245	147.451	133.635	86.348	165.329	172.187	136.617	208.825	248.367	186.138
VIT_15s0048g00370	Transketolase, chloroplast precursor	131.044	97.5703	82.5484	5.07144	8.35185	7.87573	1.75463	1.31527	1.36523	108.202	64.1871	65.5276	6.98256	7.79664	6.98985	1.7857	2.22056	1.83337	96.7472	76.2558	82.6524	6.88738	8.6351	10.3743	1.82576	2.51295	1.59536
VIT_09s0002g03620	NADP-dependent malic enzyme	131.3	142.35	141.544	107.881	133.57	111.99	41.1957	70.1268	67.6771	153.483	176.529	163.156	112.277	109.94	103.061	43.8858	58.2964	60.3646	145.539	160.079	157.379	122.685	122.336	120.887	47.252	66.0285	79.6457
VIT_13s0019g00840	UDP-glucuronate decarboxylase.	131.543	121.914	115.785	348.24	375.523	293.526	393.79	383.231	354.013	121.036	128.947	119.861	356.373	364.755	307.8	407.465	371.95	324.447	137.449	135.708	129.397	378.606	386.085	308.878	406.673	382.658	323.877
VIT_14s0066g01550	Aldehyde dehydrogenase 1 precursor	134.355	109.939	129.489	106.662	115.99	97.2677	219.915	193.032	164.378	127.011	124.681	187.008	119.348	95.5839	101.892	215.119	186.55	132.989	109.739	128.968	134.935	114.317	104.212	101.393	237.133	165.016	155.431
VIT_19s0014g00290	UDP-glucose 4,6-dehydratase	136.383	86.1957	223.839	127.301	125.799	111.79	67.5031	79.3365	61.927	77.4895	77.5919	176.996	108.861	130.382	142.939	62.3314	79.6605	69.0237	153.515	70.4805	242.877	121.591	111.849	123.777	62.1231	85.3945	65.8249
VIT_09s0002g02120	Beta-galactosidase	136.448	135.252	319.531	74.2145	58.3838	88.3427	25.0453	28.2548	31.2932	110.66	80.8174	193.554	62.7952	67.6765	70.7346	33.3418	36.498	39.0067	88.7665	106.81	423.38	55.749	60.9108	95.0455	18.6751	37.7182	38.6376
VIT_16s0100g00300	Sorbitol dehydrogenase	137.085	145.058	71.3057	71.6687	76.783	69.5382	181.884	200.748	187.648	154.909	135.945	74.4252	71.2492	61.959	63.4419	161.037	172.823	154.1	115.004	172.268	70.1503	78.1688	74.7118	65.4701	185.628	172.875	181.553
VIT_17s0000g06450	Ribulose-phosphate 3-epimerase, chloroplast precursor	140.259	138.583	140.118	67.1703	60.4931	78.5088	53.3922	68.8258	69.476	132.748	133.887	124.822	72.221	57.8253	57.8037	48.4301	60.9644	57.6372	133.541	165.135	137.618	70.4156	59.4681	71.5775	55.1473	57.5111	63.1248
VIT_11s0016g03210	NADP-dependent malic enzyme	141.653	272.059	162.455	268.338	317.097	256.897	259.84	296.733	202.79	371.034	244.857	302.809	364.388	265.217	271.128	318.454	237.833	170.376	352.298	460.306	370.625	378.644	345.198	346.085	321.283	243.426	273.077
VIT_11s0016g03070	Hexokinase-2	142.767	135.279	107.037	141.595	144.329	117.606	158.557	125.385	129.364	133.048	122.232	117.144	147.681	129.045	132.053	146.791	117.287	111.782	142.852	138.04	107.742	159.93	150.772	111.595	146.762	114.534	134.855
VIT_02s0025g04610	DTDP-D-glucose 4,6-dehydratase	143.997	82.1532	216.452	179.169	209.597	219.444	148.143	102.498	106.34	79.1978	60.4401	201.804	214.566	184.074	250.678	174.557	139.014	120.333	139.843	83.1564	230.991	145.992	228.346	199.886	120.578	121.961	117.524
VIT_02s0012g02120	Defender against cell death 1 (DAD1)	144.388	135.623	115.809	215.639	211.896	218.216	198.67	219.686	198.94	131.237	135.105	126.709	234.9	215.233	200.399	219.593	190.22	193.728	144.265	141.375	127.54	225.965	237.567	220.5	209.033	177.153	188.071
VIT_05s0094g00360	Chitinase class IV	145.455	88.1417	114.444	47.9078	110.858	31.3037	5.49419	30.4848	8.85598	42.4321	68.9714	47.1118	41.2601	100.099	25.2412	6.63937	26.4784	20.2052	235.838	69.1279	79.3196	50.604	95.9921	37.3556	4.83912	40.5354	16.8345
VIT_06s0061g00460	Lactoylglutathione lyase	146.387	148.494	138.75	70.1577	65.0979	81.6186	25.6064	42.9909	47.0207	131.008	128.343	130.579	71.1454	70.0569	66.6391	26.1566	35.311	44.489	133.358	163.343	140.733	77.7754	70.0745	89.0704	25.7314	32.5319	46.0854
VIT_05s0102g01180	Hydroxyacylglutathione hydrolase 2	148.405	123.514	184.416	190.139	155.296	179.406	84.8348	98.9211	73.1288	125.417	93.6905	141.849	204.875	194.207	152.244	88.9421	92.9879	83.3567	142.924	106.388	193.558	215.751	175.913	228.82	81.6749	87.8705	74.5663
VIT_18s0122g00960	Glyceraldehyde-3-phosphate dehydrogenase B, chloroplast precursor	148.995	134.25	152.194	119.261	120.486	109.699	82.8234	88.0434	85.9337	148.182	96.1722	119.141	150.435	95.0064	99.8715	74.3792	96.3401	60.3096	148.496	125.632	157.766	108.46	119.079	106.948	85.9496	74.5679	96.6069
VIT_14s0066g00450	Sucrase	151.995	143.756	152.332	180.908	192.801	178.089	181.334	153.515	141.369	134.274	129.715	141.887	190.827	188.485	164.602	182.791	146.966	136.873	144.561	163.43	152.187	180.647	199.111	178.925	183.067	152.139	137.213
VIT_18s0001g12750	Carbohydrate kinase	152.85	145.181	111.619	114.165	134.688	85.2079	114.657	92.7311	104.738	120.224	126.864	131.069	111.485	119.556	81.4475	113.737	99.315	117.368	172.688	155.396	142.609	123.766	125.066	87.9004	113.775	89.0366	106.243
VIT_13s0067g00180	Hydroxyacylglutathione hydrolase	155.434	148.465	150.07	107.961	107.657	111.358	87.5449	100.64	97.4804	119.987	124.485	140.718	99.6779	93.7064	98.083	88.6544	87.0993	95.3647	132.592	185.111	146.608	105.375	104.63	114.151	91.2305	85.4733	101.507
VIT_01s0011g05370	Phosphoglucomutase, cytoplasmic	158.411	146.835	149.297	234.646	217.397	228.937	370.036	327.804	305.673	147.489	133.982	134.568	231.779	247.636	229.784	364.743	323.396	286.781	143.84	127.289	143.655	250.977	241.978	239.344	360.65	329.696	255.647
VIT_00s0615g00030	Mannitol dehydrogenase (ELI3-1)	161.806	103.459	140.813	69.3461	58.2522	54.1949	2.71436	25.2239	8.14185	130.09	73.5151	120.156	71.8774	60.9145	51.6575	3.24639	24.7638	14.3988	170.828	76.3795	138.883	55.4052	60.0548	60.7295	2.82716	21.8872	14.3604
VIT_05s0077g00950	ATP citrate lyase a-subunit	164.387	136.843	131.116	214.855	264.546	150.13	435.899	589.641	481.568	145.116	122.441	131.514	230.045	241.44	217.958	445.717	524.38	397.75	146.73	141.482	126.286	249.713	252.562	161.897	544.246	512.889	449.485
VIT_05s0062g01000	Aldo/keto reductase	166.664	187.401	140.57	167.165	182.046	149.427	181.342	208.755	168.148	158.984	181.946	125.708	174.742	167.86	139.068	195.988	186.686	181.406	160.682	226.806	143.347	189.02	170.468	174.181	219.405	166.142	178.019
VIT_12s0057g01480	Glucose-1-phosphate adenylyltransferase small subunit, chloroplast	171.881	165.684	190.909	127.313	111.581	135.261	117.417	120.293	126.208	160.68	146.307	176.419	136.628	128.403	128.314	116.046	110.381	128.941	165.356	181.425	194.455	139.791	117.395	140.312	127.57	102.022	116.442
VIT_13s0067g02640	Alpha-galactosidase precursor	173.506	159.323	167.32	246.033	237.758	221.726	405.876	325.617	294.863	170.943	178.544	218.604	232.131	201.501	200.788	350.935	296.407	230.896	146.196	193.454	174.691	242.189	250.01	203.66	374.384	284.042	262.149
VIT_02s0012g00550	Inositol polyphosphate 5-phosphatase II	181.099	173.882	110.24	41.8918	39.4763	53.1629	7.54995	17.018	18.9764	189.492	172.257	169.137	32.6107	48.5618	81.781	9.557	23.22	26.4647	204.767	207.916	155.142	32.5727	51.9998	63.9497	6.4647	27.8508	27.4405
VIT_10s0071g01060	Pyruvate kinase	183.742	182.448	38.7353	64.6139	166.626	51.9912	79.7646	207.379	244.858	126.632	254.239	86.3895	67.337	124.109	61.3381	81.9556	161.134	192.428	239.322	220.929	38.2925	81.5589	135.062	50.6487	91.4787	216.286	249.918
VIT_12s0034g01860	Phosphogluconate dehydrogenase	185.82	167.76	185.977	88.3768	84.3444	90.7623	64.3727	42.1367	43.2275	154.75	142.144	159.549	92.1351	79.261	88.3853	58.5741	39.0509	45.4817	163.272	184.699	190.584	91.168	80.2698	91.0968	51.6882	30.8109	46.0664
VIT_16s0100g00290	L-idonate dehydrogenase	186.566	199.132	127.729	56.6779	60.4775	41.4503	19.8063	36.088	67.1959	130.293	173.142	130.665	45.7469	46.4381	40.1114	20.5269	25.8866	63.195	200.464	248.496	145.314	76.469	73.0949	55.465	41.6028	53.7276	84.2174
VIT_18s0001g15450	Alcohol dehydrogenase 3	187.936	254.617	111.884	151.634	213.542	123.656	70.0056	150.391	102.054	168.297	295.139	184.413	168.315	169.627	92.1463	74.3722	102.125	91.1153	200.619	404.115	125.669	223.141	210.123	159.676	106.863	114.611	100.386
VIT_01s0150g00190	Transaldolase	190.467	196.554	157.286	167.942	203.229	147.017	235.096	228.709	210.995	181.723	199.59	167.196	166.523	159.756	143.916	244.853	223.398	168.743	184.777	212.552	164.048	156.347	190.938	152.984	233.701	253.756	201.761
VIT_04s0023g03010	fructose-bisphosphate aldolase, chloroplast precursor	199.805	198.588	244.762	34.5424	26.0536	43.2997	19.0496	18.5655	21.6577	190.689	166.97	188.758	51.4663	28.9529	36.8053	18.7012	25.4329	19.0263	208.87	234.108	249.001	30.4992	27.3111	40.4326	19.4973	18.6867	27.7612
VIT_04s0079g00530	Isocitrate dehydrogenase, chloroplast precursor	205.019	206.5	175.773	320.076	377.094	309.426	266.681	328.097	300.321	192.978	189.033	178.123	298.39	333.918	265.663	270.974	279.416	266.653	163.338	198.928	158.352	352.053	354.702	337.693	289.119	311.324	293.239
VIT_07s0104g00410	Endo-1,3;1,4-beta-D-glucanase precursor	208.968	233.672	138.314	7.20681	2.91348	14.0443	0.111397	0.10371	0.40349	202.614	185.628	118.787	10.079	4.79506	9.11179	0.0563543	0.118074	0.622507	185.104	280.553	139.483	8.23341	4.54133	18.0837	0.195884	0.284305	0.293291
VIT_17s0000g03280	Alcohol dehydrogenase 7	211.035	208.614	229.681	2570.15	2370.31	2191.17	371.875	615.266	586.713	292.995	153.193	173.81	2337.37	2470.68	2136.13	466.708	487.584	803.259	197.041	190.742	242.574	3352.83	2013.04	1999.94	470.35	312.657	687.038
VIT_19s0014g02880	Glycosyl hydrolase family 5 protein	211.321	232.17	198.652	259.069	319.766	215.554	316.602	423.67	451.801	208.927	260.099	235.337	226.182	246.659	200.633	310.096	372.194	380.244	228.723	299.869	221.829	280.16	288.539	195.083	369.091	427.155	472.859
VIT_07s0005g04600	Alcohol dehydrogenase class III	213.31	210.946	183.935	115.93	105.953	108.897	36.7757	41.8546	56.5605	178.289	185.048	173.968	111.676	109.251	104.106	37.1772	35.97	55.4415	198.596	246.577	194.027	137.682	106.506	114.198	37.585	35.0465	56.605
VIT_14s0108g01590	UDP-glucose 6-dehydrogenase	215.411	182.602	314.221	206.501	205.57	259.027	62.3443	138.038	108.405	132.61	149.714	216.82	177.572	209.732	342.444	67.5948	138.95	130.77	224.977	175.338	335.727	172.712	200.686	282.029	60.6581	135.334	127.855
VIT_17s0000g05030	Alpha-1,4-glucan-protein synthase 1	215.539	166.851	175.826	300.637	344.311	238.657	136.093	166.602	137.033	129.928	154.553	176.589	288.049	345.859	275.271	149.369	172.619	153.69	298.781	162.91	188.396	340.789	353.757	254.446	149.521	170.493	150.749
VIT_05s0020g02540	Endo-1,3;1,4-beta-D-glucanase precursor	216.013	212.28	195.382	426.826	407.314	400.175	458.208	567.258	583.721	211.605	198.337	180.495	369.444	343.146	369.069	470.853	536.598	516.257	196.715	246.368	189.336	376.056	433.858	359.113	471.525	539.51	554.256
VIT_01s0011g03700	Acyl-CoA thioesterase	219.613	211.59	91.4872	68.8742	87.6519	65.4811	34.3715	48.2724	53.1818	230.285	160.463	129.733	74.6181	76.0134	56.2595	33.9345	45.2513	47.1602	194.39	245.354	102.305	91.1727	83.0204	66.157	36.0389	40.9075	62.7541
VIT_14s0068g00680	Glyceraldehyde-3-phosphate dehydrogenase A, chloroplast precursor	234.268	220.667	229.782	66.9167	58.7227	71.6896	18.1878	19.29	19.0421	234.8	181.319	181.61	95.2511	61.969	60.2534	15.4046	21.1636	16.2913	241.54	260.997	234.995	67.6184	58.6107	67.3114	18.8848	15.71	23.4329
VIT_07s0005g04610	Alcohol dehydrogenase class III	238.987	252.189	206.453	118.781	130.038	115.163	39.7818	48.1439	57.5812	205.796	206.653	206.649	121.678	106.568	108.817	36.6554	36.2101	54.3838	222.112	275.429	226.292	143.09	131.65	135.856	32.8578	40.948	63.1014
VIT_17s0000g08070	Aldehyde dehydrogenase 1 precursor	244.263	226.381	209.493	18.912	16.2538	20.9863	39.6421	26.7651	24.8689	268.387	242.574	267.83	18.8186	13.9854	18.2269	30.4563	25.6199	18.8542	190.67	217.736	218.38	18.6902	11.8237	20.9593	31.9112	19.5913	18.6391
VIT_01s0011g00690	UDP-glucose 6-dehydrogenase	255.98	164.795	423.667	218.501	263.068	169.196	73.9294	136.49	69.7245	115.383	157.666	282.025	193.351	251.57	178.154	80.7331	143.003	86.4745	331.702	157.293	459.051	196.469	249.151	195.901	77.5407	158.04	80.5498
VIT_03s0038g00670	fructose-bisphosphate aldolase, chloroplast precursor	257.66	239.051	307.791	29.9537	28.5383	38.001	16.1895	20.0252	22.0412	253.971	201.396	222.798	41.9692	30.7062	28.6013	15.4462	21.5255	18.8216	255.188	284.312	304.82	30.7035	29.7347	35.4787	21.8799	17.0864	26.6231
VIT_14s0108g01610	UDP-glucose 6-dehydrogenase	258.305	200.657	391.737	221.15	275.429	295.611	68.6366	164.085	125.942	149.806	171.255	281.578	206.901	243.652	377.876	75.2199	158.866	135.829	272.368	230.789	406.451	201.558	257.189	311.404	76.9121	160.902	153.96
VIT_07s0104g00420	Endo-1,3;1,4-beta-D-glucanase precursor	258.574	272.838	282.401	95.4886	87.9455	121.139	32.8187	39.4982	32.1167	232.789	250.771	265.093	104.514	87.6649	95.9857	28.9594	37.2664	27.4023	225.536	333.238	307.268	115.664	80.1717	141.578	40.7384	27.6633	41.193
VIT_11s0016g02850	Phosphofructokinase	262.738	157.793	112.281	285.908	288.537	198.082	130.301	149.547	126.058	150.802	115.924	108.634	259.938	316.811	197.311	134.631	153.877	124.45	372.502	106.081	128.073	329.149	305.092	195.048	120.035	156.057	109.425
VIT_11s0016g00470	Sucrose synthase	265.034	301.28	201.323	318.799	296.402	249.455	186.965	87.4185	224.588	292.305	294.63	250.993	274.207	297.538	297.681	163.034	133.301	241.012	336.622	294.396	243.442	324.331	373.955	217.548	171.937	185.919	258.906
VIT_07s0005g03350	Malate dehydrogenase, cytosolic	265.378	250.237	224.743	290.808	336.594	270.38	258.848	266.656	224.44	238.872	243.439	233.598	324.97	263.3	243.151	287.913	250.925	190.444	256.958	283.95	234.605	276.658	342.4	295.91	249.92	223.635	233.53
VIT_12s0028g02180	Phosphoenolpyruvate carboxylase.	267.164	184.839	340.535	40.8657	44.4422	38.7378	16.0347	17.9303	19.787	182.4	130.436	348.083	50.986	44.1214	46.2134	17.512	19.3419	18.2438	204.593	154.252	313.998	44.0541	45.3482	42.3743	17.8347	15.2778	29.0902
VIT_14s0060g00550	ATP-citrate synthase	269.463	257.984	242.422	190.099	238.035	190.497	228.083	248.468	220.58	233.815	255.791	254.642	201.971	205.004	172.991	229.357	247.683	213.37	258.732	301.74	246.864	211.794	218.516	195.87	232.707	265.177	211.633
VIT_10s0003g00990	Pyruvate decarboxylase isozyme 2	294.411	318.687	166.589	236.711	303.234	219.688	158.978	201.17	186.745	242.612	303.091	232.901	249.852	245.271	218.877	174.655	178.488	179.022	289.828	397.504	177.671	249.036	305.759	224.224	154.12	172.055	209.477
VIT_07s0005g03360	Malate dehydrogenase, cytosolic	294.459	299.35	238.525	288.865	337.089	303.55	225.536	246.161	218.411	275.679	270.683	250.104	301.294	305.785	279.906	249.942	220.192	202.988	276.737	300.456	262.333	321.911	344.517	336.973	248.831	192.33	232.596
VIT_14s0108g01600	UDP-glucose 6-dehydrogenase	296.028	248.468	466.663	256.618	299.685	329.757	88.1681	203.679	142.055	183.027	203.513	321.904	238.606	247.058	435.416	92.0961	198.536	141.361	330.068	266.805	495.982	201.491	299.207	355.421	83.4929	184.062	174.892
VIT_07s0031g00920	Inositol-3-phosphate synthase	303.666	320.583	430.17	68.4873	58.599	75.81	69.5044	75.9484	68.2333	444.02	257.12	344.949	81.1056	62.8653	60.6278	65.2706	80.4123	55.0546	320.464	350.211	417.905	59.3354	49.5078	73.0484	67.8149	65.2151	56.5107
VIT_06s0061g01120	UDP-D-apiose/UDP-D-xylose synthase	322.742	220.564	461.186	326.484	394.057	322.404	158.316	212.908	137.549	198.074	180.792	365.469	308.724	333.9	380.03	164.272	204.872	155.217	379.67	236.958	484.402	300.966	360.599	396.518	141.041	195.778	159.118
VIT_00s0960g00010	Phosphosulfolactate synthase protein	326.684	376.258	195.676	145.303	130.881	141.791	54.9055	90.4923	126.979	332.946	297.297	162.959	109.764	98.7685	103.746	60.1616	71.5915	118.141	249.063	493.497	196.29	154.282	102.986	121.047	53.977	62.9088	116.232
VIT_05s0029g00420	Nucleotide sugar epimerase	328.526	349.213	482.195	607.699	716.983	525.119	101.339	233.697	185.113	260.916	308.6	524.192	558.125	702.778	517.654	119.235	248.468	256.452	409.583	391.595	611.301	671.757	588.204	555.575	89.6274	168.876	237.139
VIT_04s0008g00520	6-phosphofructokinase	344.089	424.792	53.4163	164.268	223.132	140.101	42.9031	180.99	164.463	322.543	466.44	178.006	157.106	255.396	116.844	46.7746	124.189	153.02	367.349	524.178	57.2863	226.921	226.008	140.75	61.6614	149.183	144.382
VIT_04s0044g00710	UTP--glucose-1-phosphate uridylyltransferase	352.165	401.177	232.719	525.254	746.862	435.759	465.448	803.267	616.513	322.544	406.116	253.337	607.749	608.924	439.247	539.923	684.296	479.415	352.169	486.294	229.036	622.31	794.012	519.475	591.333	705.478	637.469
VIT_18s0001g13230	Beta-galactosidase BG1 [Vitis vinifera]	363.101	251.476	273.235	77.4478	52.1763	86.4702	0.43921	1.01682	1.7783	320.696	202.078	303.347	99.7575	77.544	72.0028	1.40457	1.83375	3.15953	330.472	290.35	330.636	78.1637	75.5665	106.539	0.838256	1.97999	3.1359
VIT_18s0122g00510	6-phosphofructokinase, pyrophosphate dependent	378.041	491.195	148.767	214.846	328.246	175.122	127.001	270.702	255.564	377.004	626.097	234.542	243.407	322.342	171.32	139.317	212.457	224.371	387.59	601.715	157.52	306.284	333.32	193.658	143.461	239.883	252.348
VIT_08s0056g00200	2,3-bisphosphoglycerate-independent phosphoglycerate mutase	379.369	435.651	251.044	610	721.107	537.152	844.49	991.263	877.561	340.272	431.327	283.255	577.034	739.097	504.475	890.235	861.221	896.388	397.489	470.53	266.236	690.435	657.69	563.693	983.316	917.47	815.3
VIT_04s0044g01130	Alcohol dehydrogenase 2 [Vitis vinifera]	382.904	408.496	35.6023	109.37	210.718	98.8556	26.3415	106.952	76.6179	273.851	429.59	242.472	122.407	185.821	85.0064	34.0043	84.4676	56.1309	621.359	526.475	56.3446	131.907	243.285	92.1436	40.0408	98.2723	105.431
VIT_01s0011g04350	fructose-bisphosphate aldolase, chloroplast precursor	394.569	385.314	303.279	656.158	699.67	547.152	763.752	878.759	797.012	362.729	371.894	319.513	622.169	660.242	547.088	771.239	767.281	797.183	364.814	458.168	314.746	653.756	621.624	586.16	810.837	775.691	770.309
VIT_00s2840g00010	Phosphoenolpyruvate carboxykinase	410.295	437.18	240.93	1171.29	1222.07	1136.08	1073.65	1209	861.478	375.391	306.314	150.972	895.108	1264.73	827.244	1188.47	1092.83	1077.09	325.538	317.681	194.694	1418.77	996.927	1292.47	1385.48	948.293	819.702
VIT_00s1995g00010	Phosphoenolpyruvate carboxykinase	413.187	371.18	240.746	1038.51	1422.99	1052.98	1181.51	1327.88	941.289	323.699	277.446	158.895	887.205	1092.05	821.656	1277.85	1221	989.587	359.551	373.394	211.227	1206.45	1075.31	1058.49	1487.46	1036.52	948.327
VIT_08s0007g03960	Phosphopyruvate hydratase.	434.138	452.481	358.18	647.321	751.506	606.519	839.586	849.397	681.881	424.82	479.232	383.547	678.764	742.862	590.032	943.461	782.574	662.211	446.87	460.794	364.563	729.875	727.863	710.266	933.018	730.702	684.521
VIT_00s2576g00010	Phosphoenolpyruvate carboxykinase	439.363	422.925	246.032	1313.35	1537.12	1131.61	1220.18	1363.11	992.328	366.05	304.231	164.242	1029.12	1456.17	929.824	1285.15	1243.65	1341.05	375.978	398.945	213.869	1576.42	1077.58	1197.66	1478.35	1019.83	942.272
VIT_19s0085g00370	Phosphoglycerate kinase, cytosolic	502.695	600.527	221.964	431.154	668.614	377.498	671.283	821.36	717.915	461.417	704.479	339.233	489.207	527.038	400.256	754.212	791.713	596.934	539.172	764.605	233.054	480.462	620.716	403.549	768.919	796.303	775.568
VIT_08s0007g04170	Pyruvate kinase, cytosolic isozyme	504.075	476.692	148.57	348.685	475.326	274.327	452.953	466.008	441.962	378.545	606.511	302.053	368.912	404.782	315.317	461.77	441.327	347.856	696.927	485.544	163.304	411.119	452.491	280.428	438.558	444.446	423.95
VIT_18s0001g15410	Alcohol dehydrogenase 1	570.543	509.928	193.935	31.4734	43.8476	27.3578	3.26437	9.68566	55.3252	661.434	429.745	603.242	44.8145	44.9559	24.8713	5.14774	18.904	46.0287	510.957	604.066	257.241	72.6441	71.8206	34.082	7.12976	44.3693	74.9823
VIT_13s0019g02330	GDP-mannose pyrophosphorylase (GMP1)	728.248	658.564	483.012	171.281	184.189	199.367	41.9412	64.9786	68.5194	639.385	609.951	500.285	172.562	159.391	149.094	47.887	58.2393	56.7677	688.586	701.968	544.616	181.039	190.609	198.342	51.041	68.395	84.3086
VIT_07s0005g00750	Sucrose synthase	806.196	1133.46	194.208	900.664	1246.15	668.212	419.309	974.952	984.992	773.703	1364.35	613.114	819.673	1407.59	512.345	459.551	779.211	952.75	939.589	1399.64	228.533	1380.32	1380.72	710.723	542.483	897.024	890.229
VIT_13s0019g01090	Triosephosphate isomerase, cytosolic	853.448	887.233	364.112	507.005	694.81	494.753	292.039	411.19	453.005	736.493	928.216	536.108	606.157	611.984	421.863	333.077	385.057	392.133	931.354	1123.49	393.77	604.766	698.767	537.599	292.327	378.647	471.323
VIT_16s0022g00670	Vacuolar invertase 1, GIN1	861.731	772.043	965.867	73.249	52.2743	113.338	1.60373	1.75413	3.00904	638.889	502.455	686.459	103.267	66.3892	69.0451	2.7088	2.99263	4.10985	699.078	735.3	735.438	68.5666	53.0014	124.68	1.89278	2.96884	2.3026
VIT_05s0062g01320	Chitinase	916.889	805.179	803.021	344.818	345.342	309.329	136.857	155.158	115.812	749.449	665.918	760.593	345.163	307.519	302.912	173.21	168.68	130.335	958.965	972.748	926.496	318.372	348.987	324.861	136.38	154.245	154.079
VIT_16s0022g01770	Phosphopyruvate hydratase.	977.331	1394.97	180.947	1510.93	1939.65	1237.61	1345.87	2787.33	2084.58	855.895	1791.56	630.366	1246.1	1876.94	953.045	1609.93	1884.88	2037.85	987.156	1819.08	208.498	1711.9	1817.36	1344.44	1872.32	2020.08	1866.93
VIT_01s0010g02460	Glyceraldehyde-3-phosphate dehydrogenase, cytosolic 3	1013.07	1663.18	28.5924	535.369	1205.03	411.458	158.831	838.026	947.898	926.17	1975.99	401.137	584.882	1013.6	489.523	227.966	697.326	823.93	1427.16	2425.4	55.3557	754.353	1373.16	374.144	304.602	1002.2	1176.2
VIT_08s0007g03830	fructose-bisphosphate aldolase cytoplasmic isozyme	1436.63	1575.55	682.342	1655.46	2874.96	1259.41	1848.69	2931.19	1998.63	1214.27	1969.33	1083.7	1837.02	2043.67	1293.32	2030.05	2409.51	1493.25	1590.64	1862.21	738.243	1753.4	2710.32	1380.36	2230.51	2584.56	1987.82
VIT_08s0217g00100	Pyruvate decarboxylase isozyme 2	1875.38	2004.21	287.253	392.037	639.756	320.423	148.864	217.227	243.741	1737.03	2180.92	1528.17	396.597	643.128	343.26	171.169	234.3	244.321	2372	2286.89	413.761	489.526	639.772	312.751	132.419	268.371	287.388
VIT_17s0000g10430	Glyceraldehyde-3-phosphate dehydrogenase, cytosolic 3	1913.29	1847.97	1665.61	1581.51	1896.03	1545.57	1692.89	1849.85	1585.17	1810.35	1844.11	1571.51	1741.53	1409.21	1511.03	1873.16	1782.74	1332.48	1795.52	2123.55	1679.19	1527.38	1862.85	1686.61	1766.66	1667.5	1667.67
VIT_04s0044g01110	Alcohol dehydrogenase 6	2059.93	2647.5	404.849	1366.24	1791.43	1175.03	396.447	1230.82	849.873	1950.79	2895.57	1915.59	1169.31	1712.5	950.682	475.475	855.024	816.348	2566.05	3611.7	550.904	1596.11	1860.97	1237.54	590.32	944.594	960.723
VIT_18s0001g10580	Exostosin (Xyloglucan galactosyltransferase KATAMARI 1)	3.01846	3.07119	4.66623	3.23732	3.01067	2.9867	3.3488	3.05625	3.51211	3.24096	2.8812	3.97711	2.67423	3.08107	3.63324	3.51235	3.24814	3.56442	3.09225	3.53178	4.64173	2.67474	2.75197	2.77596	3.4167	3.01432	2.84779
VIT_05s0062g00630	Exostosin (Xyloglucan galactosyltransferase KATAMARI 1)	4.59417	3.54378	6.75711	8.27916	6.9496	6.11889	13.9361	10.9616	11.8951	4.68274	2.96453	6.144	7.07239	6.96554	7.47489	14.4586	8.85351	14.6206	5.59138	2.51148	7.45247	9.19874	5.95893	7.35578	19.8654	9.79593	12.084
VIT_14s0036g01210	Exostosin (Xyloglucan galactosyltransferase KATAMARI 1)	8.07786	6.98219	9.60381	5.91862	5.66135	6.21848	6.13869	5.70816	6.25919	7.00485	7.13814	8.25423	5.65575	5.79454	5.69489	5.97105	6.41798	7.97193	7.07177	7.37736	10.4151	6.18984	5.07674	5.97939	6.14414	5.64675	5.6582
VIT_06s0004g03860	Exostosin (Xyloglucan galactosyltransferase KATAMARI 1)	14.7035	10.0565	28.0322	26.2512	20.9816	22.013	15.0846	20.1533	17.1531	10.4229	9.71611	21.0544	20.9074	17.5652	24.4226	16.1427	21.2716	19.6339	14.5244	10.2139	29.4909	17.7432	20.0305	22.9894	14.441	24.6429	19.7172
VIT_12s0034g00140	Glycosyl transferase family 8 protein	0.0780891	0.0866213	0.0529674	0.0310756	0.106673	0.0547745	0.0265686	0.0335443	0.0296657	0.548818	1.11697	0.0175757	0.0924228	0.114734	0.0347314	0.0456637	0.0157191	0.0248631	0.129026	0.0724217	0.0541927	0.0651702	0.171508	0.0136519	0.0350727	0	0.0404987
VIT_05s0094g00350	UDP-glucose transferase (UGT75B2)	4.47077	4.53443	6.42123	0.225286	0.213861	0.665081	0.0367253	0.0631831	0.0535386	4.55152	3.65088	4.09585	0.308224	0.310664	1.11561	0.027313	0.0440934	0.0704273	4.2402	3.8504	7.69555	0.143913	0.152122	0.788389	0.0305992	0	0.185897
VIT_17s0119g00150	Trehalose 6-phosphate synthase	0.0872346	0.0649036	0.0260874	0.08609	0.0361483	0.119503	0.391731	0.43809	0.565112	0.0545296	0.253173	0.114871	0.0576693	0.039579	0.212149	0.439477	0.377126	0.430912	0.0658411	0.131016	0.10138	0.040974	0	0.0395393	0.743716	0.49121	0.408124
VIT_15s0048g02600	Chitinase 2	0.272321	0.443669	0.228984	0.0817413	0.067703	0.193881	1.01891	0.653079	1.21641	0.541452	0.289218	0.291636	0.0590387	0.115837	0.127062	0.575502	0.247511	1.1405	0.450633	0.813062	0.267081	0.0626625	0	0.0748013	1.89987	0.320242	0.666095
VIT_08s0058g00650	UDP-glucose glucosyltransferase	0.574438	1.33765	0.159108	0.0184946	0.0163569	0.0350581	0.067539	0.0832071	0.102228	0.647007	1.15458	0.232698	0.0115511	0.051713	0.0168717	0.0371554	0.198405	0.0485724	0.655002	1.13832	0.126542	0	0.0786571	0	0.0592283	0.245136	0.0661684
VIT_08s0056g01140	Chitinase class IV	0.0167943	0.0848829	0.048275	0.0754769	1.57764	0.184853	0.167643	3.59301	0.154937	0.224024	0.100452	0.102478	3.09021	3.01485	3.65126	1.62599	11.946	1.22425	0.0309844	0.0460752	0	0.78869	0.960435	0.17336	1.93251	2.72219	5.08005
VIT_08s0040g02340	Alpha-amylase/subtilisin inhibitor	0.132308	0.748186	0.0847716	0.106115	0.537673	0.0362903	0.478389	0.255241	0.39667	0.141602	4.42778	0.233837	0.527611	0.206138	0.536195	0.769637	0.532185	1.25722	4.82376	0.874479	0	0.217357	0.642016	0.356318	0.764741	1.17588	0.874987
VIT_02s0025g00570	Starch synthase	0.156877	0.0594954	0.172826	0.251166	0.152105	0.362976	0.375409	0.230157	0.177425	0.0745124	0.0779131	0.150364	0.245357	0.129436	0.21758	0.249952	0.411763	0.238055	0.14712	0	0.170344	0.0966874	0.21134	0.27812	0.347078	0.185308	0.20159
VIT_06s0009g01650	Aldose reductase	0.0269912	0.24754	0.0121836	0.0215616	0.467358	0.115461	0.0201397	0.188859	0.0185274	1.60642	2.2717	0.0386891	0.145057	0.0776973	0.119027	0.0819733	0.0437922	0	0	0	0.0598554	0.0991132	0.0651274	0.262405	0.34516	0.0763745	0.0790434
VIT_12s0057g01030	Exostosin	0.373799	0.29836	0.506699	0.119981	0.139037	0.158588	0.0315357	0.0197486	0.0212614	0.511652	0.494915	0.671654	0.208425	0.308661	0.164178	0.0747522	0	0.0639578	0.817688	0.26501	0.669985	0.360164	0.204804	0.264721	0.0164643	0.028432	0.044388
VIT_15s0046g01690	Xylan synthase	1.74285	1.35239	1.54046	0.243447	0.29802	0.694537	0.321307	0.184029	0.517631	3.25781	4.49576	2.13433	0.228785	0.215214	0.418292	0.30924	0	0.391626	2.39776	2.10373	2.16036	0.186786	0.361937	0.490077	0.187496	0.35061	0.686649
VIT_14s0066g00240	Glycoside hydrolase, family 5	0.163157	0.104917	0.0506728	0.014355	0.0178346	0.0131233	0.0127753	0.0400257	0	0.190993	0.0786782	0.0516372	0.0381588	0.046417	0.0548463	0.0639595	0	0.0121384	0.207793	0.188842	0.118327	0.0460713	0.0295561	0.0348734	0	0	0.0130717
VIT_02s0087g00050	Trehalose synthase	0.365235	0.215618	0.607277	0.448813	0.267561	0.585387	0.0332256	0.0611215	0.0507541	0.218184	0.220748	0.342537	0.334416	0.408519	0.470901	0	0.0375633	0.0316097	0.48029	0.224733	0.580781	0.33964	0.2921	0.730318	0.0272261	0.0531954	0.0415403
VIT_05s0077g01310	Glucose-6-phosphate 1-dehydrogenase 2, chloroplast precursor	0.0446963	0.098981	0.184446	0.579547	0.754525	0.507343	0.0126335	0.100392	0.107412	0.138746	0.0275836	0.0854422	0.992309	0.573617	0.437778	0	0.0541363	0.0976253	0.0901901	0.037938	0.141234	0.890831	0.294969	0.74362	0.0330419	0	0.223051
VIT_00s0270g00120	Chitinase, class III	0.0274181	0.0697201	0.0184998	0.065479	0.255879	0.150709	0.0553738	0.0348263	0.0562647	0.039366	0.156601	0.0396228	0.130066	0.200977	0.102942	0	0.03719	0.109878	0.0232717	0.0680981	0	0.061671	0.172109	0.128815	0.0773975	0.136918	0.0257801
VIT_04s0008g03420	Alpha-L-fucosidase 2 precursor	0.00951937	0.054217	0.0464457	0.0310989	0.0350787	0.027957	0.128838	0.339216	0.254703	0.074533	0.0949617	0.0580094	0.0448789	0	0.0214596	0.0450171	0.196305	0.305468	0.105271	0.272564	0.0211208	0.0128441	0	0.0704217	0.0685047	0.366527	0.217677
VIT_14s0108g01620	Alpha-glucosidase	0.0894325	0.0823952	0.0213785	0.130866	0.0812933	0.110001	0.0313535	0.124303	0.164035	0.0680686	0.0571813	0.0471928	0.056801	0	0.120315	0.0374997	0	0	0.207895	0.104328	0.133573	0.121354	0	0.0470777	0.095598	0.0211704	0
VIT_14s0171g00440	Aldo-keto reductase	0.222524	0.447005	0.118625	0.0223945	0.0140598	0.0796913	0.0409637	0.0836357	0.689746	0.240679	0.440296	0.311309	0	0	0.0417956	0.0521928	0.172811	1.00513	0.538723	0.37826	0.198407	0.0488523	0.136862	0	0.145453	0.293217	0.919872
VIT_03s0063g01510	Alpha-amylase/subtilisin inhibitor	0.0665885	0.0281634	0.0253649	0.328082	1.15617	0.0354863	0.991839	1.57265	4.57922	0.107548	0.0912927	0	0.197905	0.554873	0.076666	1.31141	6.20428	7.29726	0.237631	0.521152	0	0.209419	0.490824	0.0768883	0.848924	14.7282	3.33473
VIT_05s0020g03770	Exostosin family protein	0.214652	0.140865	0.128229	0.0919557	0.269845	0.107127	0.110174	0.113117	0	0.0613013	0	0.069653	0.081684	0.2611	0.158569	0	0.120795	0.20453	0.132533	0.0770917	0	0.282691	0.234118	0.223392	0	0.139632	0.260176
VIT_14s0083g01100	UDP-glucose 6-dehydrogenase	0.754752	0.080438	0.549113	0.202771	0.141714	0.129157	0.129289	0.470245	0.252108	0	0.161577	0.383202	0	0.265872	0.191178	0	0.145636	0.502918	0.385365	0	0.525797	0.125818	0	0.445535	0.218818	0.344071	0
VIT_18s0122g00980	Glyceraldehyde-3-phosphate dehydrogenase GAPC3,cytosolic	0.0190184	0.0324435	0.0273843	0.0719717	0.0676866	0.333867	1.02408	0.230513	0.781857	0	0.0143101	0	0.037798	0.165108	0.521263	0.941405	0.601217	0.661954	0	0	0.052501	0	0.126474	0.328078	0.971777	0.540525	0.613592
VIT_17s0000g00690	Trehalose-phosphatase	0.157222	0.0677634	0.348865	0.178158	0.0940388	0.368458	0.010056	0	0.0121061	0.0982009	0.193263	0.230104	0.176821	0.16997	0.255995	0.0125326	0.0128295	0.0310213	0.337936	0.103176	0.233585	0.17485	0.14174	0.282523	0.0109196	0.0107857	0.0598972
VIT_05s0077g01930	Inositol polyphosphate 5'-phosphatase	0.204475	0.243786	0.429662	0.10725	0.141299	0.332192	0.0200452	0	0.0576224	0.167146	0.177544	0.360785	0.164821	0.14243	0.180283	0.0293603	0.0204253	0.0564885	0.325419	0.319903	0.344936	0.141591	0.160276	0.252734	0.0169398	0.0467759	0.0780903
VIT_05s0094g00320	Alpha-1,4-glucan-protein synthase 1	19.4461	15.6953	26.8409	0.136645	0.574884	0.265752	0.0609532	0	0.0452918	14.2745	8.13917	41.0638	0.61855	0.768923	0.630094	0.149564	0.156887	0.0522357	29.5364	14.0931	43.3119	0.250896	0.696684	0.857892	0.11906	0.11346	0.088481
VIT_17s0053g00700	Glucan endo-1,3-beta-glucosidase 7 precursor	46.3707	32.5516	45.7127	1.29791	0.523842	1.60123	0.110001	0	0.0656439	36.8054	20.6304	41.6265	1.76796	1.04731	0.778212	0.0971672	0.0201063	0.0452768	32.2671	26.2444	32.5091	1.10136	0.693054	1.67758	0.0370346	0.066831	0.0967324
VIT_03s0017g01370	Pyruvate dehydrogenase E1 beta subunit isoform 2	0.153876	0.138269	0.250751	0.0487701	0.0724456	0.35081	0.0462741	0	0.0845437	0.11348	0.302155	0.201556	0.106779	0.0943524	0.148693	0.0266203	0	0.123947	0.329001	0.241211	0.37526	0.190812	0.111389	0.315821	0.0833296	0.0958825	0.169934
VIT_00s0375g00030	Sucrose synthase	1.43141	7.68737	0.507318	0.0270691	0.0170118	0.0282034	0.00805793	0	0.0170435	45.9765	151.419	0.347565	0.0629908	0.0555634	0.0397247	0	0.0112655	0.0765197	0.0272266	0.0826011	0.275557	0.0289468	0.0947389	0.0210207	0	0.0086858	0.0227879
VIT_07s0005g02560	Chitinase, class IV [Vitis vinifera]	0.168523	2.09847	0.231364	0.0686284	1.09078	0.0290943	0	0.364106	0.210196	0.0685474	1.78587	0.0482127	0.0925153	0.976592	0.0313286	0.108013	0.652967	0.36707	0.505905	2.55701	0.46024	0.036117	1.07482	0.0315194	0.0326384	1.28198	0.337855
VIT_12s0055g00180	Sucrose synthase 2	0.522771	0.712957	0.231487	0.794555	1.13336	1.02984	0	0.0477697	0.0750901	0.514545	0.587293	0.0844941	1.18332	1.14082	1.22156	0.0606928	0.0662427	0.0432934	0.673167	0.507276	0.110717	1.63951	1.37367	1.22218	0.0282717	0.0069531	0.0442315
VIT_00s1290g00010	UDP-glycosyltransferase 85A8	0.60338	1.04594	0.462134	0.0956445	0.144731	0.113735	0	0.0835633	0.10215	0.974716	1.08731	0.490713	0.140899	0.148331	0.120864	0.0558305	0.24316	0.231631	0.716202	1.08034	0.345721	0.365509	0.245135	0.186316	0.0306568	0.212909	0.147136
VIT_00s0895g00010	Alpha-galactosidase	14.5415	14.2698	13.9048	0.181743	0.339381	0.408496	0	0.0512151	0.0457633	13.555	11.5939	17.4506	0.346787	0.563055	0.244453	0.0669221	0.036465	0.101452	23.6759	16.0631	20.0432	0.457733	0.412038	0.344248	0.0442769	0.0904736	0.0950943
VIT_10s0092g00260	Chitinase Class I	0.769354	0.502559	1.08291	0.265872	1.57348	0.396425	0	0.158753	0.088436	0.347747	0.590921	0.233311	0.243703	1.75897	0.611533	0.0444847	0.0524433	0.146085	2.78415	0.229878	0.401597	0.392878	1.386	0.299547	0	0.12632	0.0363537
VIT_12s0055g00280	UDP-glucose glucosyltransferase	0.092435	0.280369	0.106201	0.0351953	0.0894202	0.0337296	0	0.125869	0.0628171	0.110156	0.159373	0.0910186	0.0329729	0.0301729	0.129225	0	0.0383258	0.0756359	0.180671	0.163941	0.134917	0.0686686	0.115961	0.0357922	0.029643	0.0233221	0.0642245
VIT_04s0008g00140	Chitinase Class I	21.6792	115.934	51.4283	0.345484	2.04807	0.666603	0	0.17701	0.0365723	1989.94	587.105	21.4978	0.63302	0.824234	0.282345	0	0.158526	1.01434	0.132873	2.1192	24.8541	0.250778	0	1.70001	0.032988	0.0208141	0.0577129
VIT_10s0092g00250	Glucan 1,3-beta-glucosidase	0.196194	0.14503	0.165116	0.0695567	0.160071	0.076761	0	0.0188059	0.0134041	0.190274	0.180271	0.04949	0.212191	0.0825152	0.109757	0	0.0177198	0	0.224906	0.164329	0.246232	0.130219	0.172611	0.188631	0	0.0248413	0.0122834
VIT_01s0011g03750	Alpha-glucosidase 1 (AGLU1)	4.26167	5.54491	4.72245	0.12079	0.19784	0.102751	0	0.0512603	0.041456	5.49856	6.0778	5.82459	0.209919	0.375793	0.193304	0	0	0.106791	5.87166	5.26634	5.46934	0.148508	0.0288757	0.277645	0	0	0.0421843
VIT_07s0104g00430	UDP-glycosyltransferase 71A13	0.108067	0.169517	0.108515	0.0199515	0.037636	0.0200992	0	0.0906211	0.0269065	0.145412	0.158576	0.120162	0.0209396	0	0.0325711	0	0.0670243	0.0159242	0.0680398	0.265029	0.077632	0.0237442	0.0335607	0.0404314	0.0157307	0.0673066	0
VIT_03s0038g00150	Alpha-glucosidase 1 (AGLU1)	4.60287	5.36104	5.85041	0.126846	0.249552	0.220841	0	0	0.0461439	6.08027	5.52517	6.3485	0.294804	0.289791	0.231051	0.0127456	0.0519445	0.0220371	6.03456	5.85083	6.95194	0.196414	0.156699	0.313651	0.0359787	0.0546595	0.0819203
VIT_08s0032g00890	Phosphomannose isomerase	0.903518	0.602573	1.47655	0.0690559	0.0258975	0.178588	0	0	0	0.635531	0.283161	0.763488	0.0554102	0.0227765	0.0213975	0.0245353	0.0252323	0.0192397	0.884399	0.203421	1.70376	0.0450499	0.0165083	0.0412893	0	0	0
VIT_12s0121g00230	Endo-1,3;1,4-beta-D-glucanase precursor	0.595306	0.803124	0.229288	0.138109	0.0250369	0.110035	0	0	0.0279816	0.781082	0.677531	0.571736	0.0862161	0.0272224	0.167509	0	0.167888	0.0721187	0.907314	1.08955	1.07785	0.148306	0.250274	0.454167	0.0542159	0.179401	0.13465
VIT_04s0008g01140	Glucosyltransferase-11	0.452463	0.581225	0.471442	0.311229	0.262587	0.169589	0	0	0.0188283	0.411862	0.484797	0.27731	0.366881	0.152656	0.247816	0	0.0584181	0.0786267	0.499311	0.716212	0.413316	0.247949	0.232218	0.1877	0.0132821	0	0.0288882
VIT_10s0003g03690	Beta-D-galactosidase	0.064009	0.075397	0.0923771	0.0400227	0.0267142	0.0750442	0	0	0	0.380064	0.318411	0.044262	0.0242986	0.0484614	0.0476092	0	0.00928773	0	0.372842	0.177143	0.0666251	0.0178562	0.0269245	0.0501396	0.0064481	0	0.00701903
VIT_12s0055g01180	Alpha-L-arabinosidase	0.46211	0.464088	0.641359	0.0090835	0.0171092	0.0687544	0	0	0.0304993	0.636491	0.274131	0.512055	0.0331658	0.0289282	0.0418982	0	0	0.033271	0.788011	0.613222	0.860636	0.0194113	0.0658345	0.0107352	0	0.0174301	0.0270522
VIT_19s0014g00090	Beta-D-xylosidase	0.4141	0.300942	1.09928	0.041871	0.0756938	0.0489798	0	0	0.0110384	0.462828	0.390138	0.588473	0.0305857	0.0298189	0.0945734	0	0	0.0176993	0.58405	0.282781	1.25219	0.0630304	0.044757	0.112984	0	0	0.0088405
VIT_18s0001g09870	Beta-fructosidase (BFRUCT1)	0.101056	0.793886	0.231715	0.0399147	0.0646964	0.0732799	0	0	0.0164508	0.278766	0.477397	0.038537	0.0373467	0.104393	0.0244046	0	0	0.0374068	0.1065	0.327092	0.582821	0	0.0441708	0.0125241	0.011378	0.0401649	0.054943
VIT_18s0001g06360	Beta-1,3-glucanase precursor	0.7011	0.291382	0.223383	0.592685	0.902906	0.283869	0	0	0	0.0283793	0.163075	0.0773133	0.19634	0.277513	0.163555	0	0	0	1.00593	0.0159279	0.268705	0.712781	0.566375	0.542149	0.0170946	0.0122939	0.0389087
VIT_18s0041g01040	Alpha-L-arabinosidase	0.260002	0.159843	0.388641	0.073925	0.0229609	0.059984	0	0	0	0.264712	0.104326	0.322824	0.0224305	0.0571061	0.0294953	0	0	0	0.267016	0.103914	0.625996	0.019902	0.0343959	0.125469	0	0	0.032089
VIT_14s0060g00800	Glucan endo-1,3-beta-glucosidase 4 precursor	9.9329	7.39774	8.80037	0.0567227	0.0547907	0.0448413	0	0	0	12.6611	6.73784	11.0491	0.070854	0	0.0845823	0	0.0591017	0	12.8009	5.88446	10.9859	0.11133	0.0936403	0.048579	0	0.0317397	0
VIT_17s0119g00280	Carbohydrate esterase	0.192798	0.1241	0.385973	0.119181	0.0281047	0	0.122983	0.0748207	0.0305155	0.236391	0.117694	0.244626	0.037272	0.0304451	0.0284501	0.0361463	0.0403407	0.0283446	0.32434	0.148172	0.337488	0.034851	0.0829473	0.095817	0.0242032	0.0198717	0
VIT_19s0014g05130	Alcohol dehydrogenase	0.028912	0.083705	0.147245	0.0181462	0.0374299	0	0.104843	0.0252982	0.0535493	0.459178	0.269874	0.062924	0.0303392	0.0157455	0.0168112	0.0969152	0.0835727	0.0571102	0.08505	0.172373	0.02237	0	0	0	0.067244	0.0556218	0.0428241
VIT_02s0087g00280	UDP-glycosyltransferase 88A4	0.546472	1.32965	0.235633	0.0150217	0.0145183	0	0.0162259	0	0	0.820874	0.966777	0.314939	0.0546953	0.0310833	0	0	0	0.0602509	0.899079	0.966666	0.335391	0.0170476	0	0	0	0	0.0173797
VIT_07s0005g02040	Galactinol synthase	0.0799982	0.102958	0.138967	0.0275466	0.0295944	0	0	0.0302877	0	0.0878319	0.0773943	0.0663013	0.0575605	0.0749645	0.023675	0.0280378	0.0266527	0	0.0743779	0.169109	0.124146	0.027033	0.0832049	0	0	0	0.0275597
VIT_02s0087g00060	Alpha-amylase/subtilisin inhibitor	0.0302529	0.117647	0.0998181	0.0930557	0.260045	0	0	0.0930823	0.080914	0.13286	0.0595377	0.0275716	0	0.113561	0.0364073	0.044699	0.221887	0.101037	0.505462	0.117363	0	0.209339	0.28996	0	0.189955	0.443838	0.301172
VIT_12s0055g00030	Glycosyl transferase family 8 protein	0.105052	0.132345	0.0745464	0.0137783	0.0407935	0	0	0	0	0.370994	0.957785	0.0339723	0	0	0.0119781	0	0.0140866	0	0.103491	0.0300334	0.0809387	0	0.0094359	0	0	0.0182603	0
VIT_12s0055g00070	Glycosyl transferase family 1 protein	0.126866	0.0609436	0.0999026	0.0603924	0.0150798	0	0	0	0.0181012	0.481181	0.213331	0.227897	0	0	0.0159261	0	0	0.0300904	0.0105246	0.0667343	0.0230558	0.0163396	0	0.0229086	0	0.0498199	0.028994
VIT_12s0055g00170	Alpha-L-fucosidase 2 precursor	1.82795	1.87598	1.07893	0.0795384	0	0.061937	0.0232676	0.209916	0.038595	2.38072	2.84134	2.34608	0.0611664	0.226932	0.0514795	0.178818	0.218834	0.39206	7.40418	3.30992	1.31105	0.0838936	0.145103	0.083834	0.131471	0.237015	0.173038
VIT_19s0014g03260	Alpha-glucosidase	0.065551	0.0186112	0.0831633	0.148537	0	0.109129	0.110514	0.107832	0.178087	0.109007	0.0388001	0.0364209	0.166316	0.105875	0.0927195	0	0.229331	0.0267163	0.100977	0.153356	0.117074	0.183687	0.187237	0.147645	0.0756943	0.172695	0.106072
VIT_15s0046g01210	UDP-glucose glucosyltransferase	0.193976	0.333592	0.311911	0.117021	0	0.0186741	0.0326781	0.0214194	0.037606	0.23594	0.250672	0.349834	0.0115775	0.0850429	0.0955306	0	0.0195797	0.0455153	0.261268	0.408583	0.363116	0	0.095539	0.0691973	0	0.020745	0.029193
VIT_12s0055g00060	UDP-glycosyltransferase 71A13	0.378785	0.487243	0.272213	0.0283875	0	0.0259517	0.0614672	0.0349203	0	0.363482	0.37812	0.263862	0.0493269	0	0.0752507	0.0320665	0.0704313	0.0865636	0.269865	0.663692	0.188918	0	0.0626364	0.07629	0.0246661	0.0664418	0.0518509
VIT_07s0129g00230	UDP-glucose glucosyltransferase	0.106789	0.278704	0.171985	0.039112	0	0.0309196	0.0405223	0.041605	0.267767	0.100061	0.216365	0.0963799	0	0	0.026989	0.11641	0.0815053	0.262749	0.125746	0.135518	0.0904106	0	0.089712	0	0.0608633	0.0337277	0.129389
VIT_00s0357g00110	Arbutin synthase	0.645442	0.971891	0.975714	0.0147892	0	0.030832	0.0828692	0	0.077718	0.824293	0.673427	0.534009	0.0106817	0	0	0.0340821	0.0194274	0.0598367	0.739419	0.709213	1.144	0	0.0157866	0.042562	0	0.0584278	0
VIT_16s0050g02600	UDP-glycosyltransferase 71A13	0.138687	0.265558	0.156159	0.140929	0	0.0267834	0	0.0480423	0.0333108	0.169829	0.236405	0.287578	0.059186	0	0.0374167	0	0	0.032582	0.469453	0.71277	0.220565	0	0	0	0	0.0189579	0.0266781
VIT_16s0050g02230	Glucan endo-1,3-beta-glucosidase 7 precursor	0.0297411	0.053651	0.0244192	0.0782635	0	0.0430794	0	0	0	0.0883463	0.0137271	0.0231984	0.0126479	0.0563872	0.18705	0	0.0243589	0.016163	0.0568941	0.0577629	0.0168052	0.0718907	0.080807	0.161112	0	0	0
VIT_19s0176g00150	Xylan 1,4-beta-xylosidase	0.099965	0.0855314	0.289834	0.0155594	0	0.0678389	0	0	0	0.142438	0.100959	0.149895	0.0133085	0	0.0848124	0	0	0	0.237	0.110276	0.393717	0	0.0106557	0.0914838	0	0	0.0155668
VIT_05s0077g02300	Trehalose-6-phosphate phosphatase	0.0763242	0.035285	0.0405904	0.0375453	0	0	0.0553996	0	0.0518104	0.119795	0.0444677	0.0553291	0.0246609	0	0	0.0815981	0.0587067	0.0449727	0.0168042	0.0381037	0.066675	0.0275916	0.0806371	0	0.0218791	0.0834898	0.0844003
VIT_18s0089g01230	Chitinase [Vitis vinifera]	0.171416	0.0200284	0.060411	0.0276048	0	0	0	0	0	0.0804292	0.0699437	0.207391	0	0	0	0	0	0	0.0426888	0.0455814	0.0482489	0	0	0	0	0	0
VIT_00s0233g00020	fructokinase-2	0.335034	2.33778	0.461131	0	0.076428	0.0498076	0.277985	0.294963	0.393455	12.0575	16.1718	0.157278	0.0291569	0.0343213	0.0332744	0.254215	0.308966	0.40875	0.450274	0.535222	0.18597	0.0558027	0.086182	0.0171434	0.171165	0.368219	0.584736
VIT_04s0008g00120	Chitinase 1	0.398231	0.515134	0.105915	0	0.0351293	0.112251	0.0373747	0.0461357	0.078954	0.418251	0.186059	0.225396	0.0249909	0.109229	0.0276109	0.0407267	0	0.218384	0.356431	0.874522	0.210341	0	0.0644926	0.0342687	0	0.0576875	0.0935373
VIT_02s0025g00560	Mannitol dehydrogenase	0.521086	2.48143	0.86294	0	0.218701	0.020565	0.172743	0.407636	0.218864	9.46644	12.8858	0.5647	0	0.0716661	0.0589628	0.0757968	0.356082	0.112104	0.0739643	0.445295	0.487563	0.0486167	0.06638	0.146724	0.563847	0.668892	0.290013
VIT_15s0021g02060	Ribitol dehydrogenase	15.7019	26.3788	9.69939	0	0.0176392	0.0854822	0.101733	0.0485148	0.105773	18.7046	15.8663	15.7387	0	0.147484	0.124374	0.111333	0.13842	0.345321	19.8283	24.2125	15.1046	0.0869562	0.0229225	0.0203223	0.0420877	0.120442	0.228532
VIT_01s0137g00710	Transaldolase	0.0248761	0.0883933	0.00994377	0	0.0354786	0.0455513	0.0164373	0	0	0.023364	0.0404086	0.0445137	0.0390874	0.0189676	0.0281956	0.0174421	0	0.0173879	0.0480961	0.0268062	0.012567	0.0172697	0.0881599	0.0218972	0.0142004	0	0.013857
VIT_19s0015g01350	Chitinase precursor	0.260448	1.21024	0.254659	0	0.0840216	0.0461683	0.0272751	0	0.033701	1.66326	3.16849	1.34339	0.0182378	0.0272163	0.0233932	0	0	0	0.429428	2.84761	1.07442	0.0286563	0.190881	0	0	0.02236	0
VIT_08s0007g04250	Glycoside hydrolase, family 5	0.0376961	0.0851442	0.0102188	0	0.047215	0.0781868	0	0.0153217	0.0156793	0.0374759	0.210819	0.00913427	0.0118435	0.0120547	0.0110042	0	0	0.020751	0.00796463	0.0426779	0.0588072	0.0803853	0.0943844	0.067002	0.00995687	0.0205743	0.0421548
VIT_19s0090g00750	Arbutin synthase	0.0518979	0.181244	0.0115182	0	0.0386227	0	0.0485987	0.206166	0.157883	0.0337008	0.341577	0.0347355	0.0112266	0	0	0.071752	0.501455	0.184912	0.145079	0.0894301	0.0396968	0.0546674	0.01231	0	0.130738	1.10615	0.120775
VIT_01s0011g06310	Alpha-L-fucosidase 2 precursor	0.415106	0.506584	0.417497	0	0.016381	0	0.0992987	0.0681558	0.171081	0.659889	0.528781	0.341128	0	0.0177753	0.0166105	0.13714	0.0471053	0.13845	0.486927	0.559384	0.246351	0.0184018	0	0	0.0367757	0.167299	0.174541
VIT_16s0039g01500	Stachyose synthase precursor	0.356906	0.600191	0.0242027	0	0.00886493	0	0.0184004	0.0375701	0.04243	2.64587	4.49466	0.0993343	0	0.0582044	0	0.0109132	0.0453667	0.0267029	1.01609	0.149398	0.0889068	0.0105222	0.0103576	0	0.0319013	0.0232291	0.015796
VIT_03s0097g00220	Dihydrolipoamide succinyltransferase	0.124056	0.104791	0.0405957	0	0.0246278	0	0.0675842	0.0243848	0	0.174694	0.394253	0.19509	0	0	0.0216605	0	0	0.0221667	0.110872	0.169342	0.101921	0	0.0541973	0.0725408	0.0181113	0.134294	0.0541523
VIT_16s0022g02170	Inositol polyphosphate related phosphatase	0.0816336	0.0555958	0.0745177	0	0.0157529	0	0.0217414	0.0252982	0	0.0368406	0.153286	0.0361782	0	0	0.0168112	0	0	0	0.0108597	0.11099	0.0616074	0	0.0143711	0.0179719	0	0.0117422	0
VIT_04s0008g05710	Alcohol dehydrogenase	0.109953	0.127242	0.0308551	0	0	0.216521	0.0663778	0.044503	0.141264	0.066085	0.123307	0.0713879	0.122184	0.10082	0.0858275	0.109766	0.0363733	0.207884	0.0262397	0.0267618	0.104366	0	0	0.06323	0.148636	0.107408	0.137796
VIT_12s0059g01220	Beta-galactosidase	0.708231	0.386722	0.886567	0	0	0.033738	0.0895568	0	0.0573854	0.880193	0.496659	0.629438	0.0194526	0.085347	0.042984	0.0663807	0	0.0248589	0.561177	0.64957	0.437688	0.123397	0.062799	0.101066	0.0276213	0.0587054	0.0526087
VIT_18s0001g01160	1,4-beta-mannan endohydrolase	0.075508	0.0687693	0.261451	0	0	0.0998573	0.0429697	0	0.053884	0.131765	0.0779577	0.0358973	0.0342293	0	0	0.160459	0	0.149152	0.186633	0.0376067	0.0877137	0.04864	0.0375323	0	0.0426413	0.0916133	0.181644
VIT_15s0048g01710	Alpha-L-fucosidase	0.0739396	0.0929763	0.0286962	0	0	0.0112811	0	0.007668	0	0.116703	0.0702657	0.0313018	0.0119448	0.00611687	0	0.0065062	0	0	0.0943127	0.0439967	0.0507178	0.0133345	0	0.0122214	0	0	0
VIT_13s0074g00090	Exostosin-like	0.0640616	0.0674554	0.0872079	0	0	0.0149041	0	0	0.0185363	0.251794	0.255814	0.143895	0.011775	0.0175719	0	0	0	0	0.0512236	0.11357	0.085348	0.0159554	0	0	0	0.0105494	0
VIT_06s0004g02690	Pyrophosphate-dependent phosphofructokinase beta subunit	0.0190588	0.00867897	0.0323139	0	0	0	0.087346	0.0313916	0.092201	0.0985561	0.221729	0.0158468	0.0193579	0.0593752	0.0394566	0.0651292	0.0599672	0.0928517	0.00989517	0	0.0194372	0.0376297	0.0323557	0	0.0534467	0.0581493	0.105824
VIT_14s0030g02060	Glycosyl transferase family 2 protein	0.072204	0.0287225	0.0571751	0	0	0	0	0.0102179	0	0.413452	0.718146	0.0759458	0	0	0.0300543	0.00855157	0.0276201	0.00676487	0.146718	0.011887	0.0205988	0.0083177	0.00818763	0	0	0.00474267	0
VIT_12s0034g00160	Acidic endochitinase (CHIB1)	0.208871	0.046843	0.0856943	0	0	0	0	0.0317163	0	0.0560415	0.555191	0.151655	0	0	0.0215749	0	0	0.0249548	0.217062	0.211489	0.146185	0.109603	0	0	0.0243268	0	0
VIT_15s0046g01960	Alpha-galactosidase	0.489773	2.00914	1.30578	0	0	0	0	0.0213462	0	35.4379	9.84579	0.7063	0	0	0	0	0	0.0314278	0.476788	0.385882	0.730249	0	0	0	0	0	0.0205687
VIT_04s0008g01150	Chitinase-3 protein 1 precursor	0.370433	0.218227	0.0145747	0	0	0	0	0	0	0.290511	0.256416	0.0316686	0.0481607	0	0	0	0	0	1.5024	0.184888	0.0607135	0.0228918	0.0176641	0	0	0	0.0258055
VIT_05s0094g01030	Aldo/keto reductase AKR	0.200206	0.129927	0.104533	0	0	0	0	0	0	0.164602	0.150401	0.254327	0	0.0253301	0.0187533	0	0	0.0223768	0.0546188	0.266797	0.12152	0	0	0	0.0211454	0	0
VIT_06s0061g00100	Hydroquinone glucosyltransferase	0.212824	0.209322	0.315731	0	0	0	0	0	0	0.176726	0.139074	0.131448	0	0	0	0	0	0	0.119978	0.206001	0.501102	0	0	0	0.0160119	0	0
VIT_08s0007g06010	Beta-fructosidase (BFRUCT1)	0.147467	0.143029	0.0761815	0	0	0	0	0	0	0.097541	0.0178018	0.00752117	0	0	0	0	0	0	0.114604	0.0934699	0.0937365	0	0	0	0	0	0
VIT_05s0094g00250	UDP-glucose:salicylic acid glucosyltransferase	1.29152	0.642924	0.956247	0	0	0	0	0	0	0.604981	0.312469	0.659714	0	0	0	0	0	0	0.509892	0.813047	0.575389	0	0	0	0	0	0
VIT_19s0085g00810	1,4-beta-mannan endohydrolase	0.0172904	0.0129534	0	0	0	0	0.326697	0.232291	0.0177407	0.408323	0.823697	0	0.0216686	0	0.0142467	0.302912	0.0431382	0.017296	0	0	0	0	0	0	1.04706	0.0115527	0.0313939
VIT_05s0020g02380	Beta-glucuronidase	0.018634	0	0.0159068	0.0301067	0.0383667	0.066803	0.0638815	0.030054	0.0564293	0.00507333	0.0180364	0.0166472	0.0504836	0.0395288	0.0491183	0.0506283	0.00872777	0.0424375	0.00537053	0	0.0278051	0.0433561	0.0256033	0.0597629	0.0678734	0.00769623	0.0354523
VIT_11s0118g00060	Glycosyltransferase	0.0152039	0	0.0548988	0.173335	0.220373	0.277911	0.146368	0.169356	0.303849	0.0659746	0.0139074	0.0252831	0.0484691	0.114385	0.233742	0.407796	0.211975	0.460505	0	0	0.0693391	0.0638943	0.109535	0.322563	0.289992	0.217545	0.41213
VIT_01s0011g00750	Lactoylglutathione lyase	0.0286957	0	0.0265923	1.55365	0.835983	0.918411	0.133118	0.421126	0.206914	0.252746	0.126679	0	1.64146	1.01032	0.412228	0.279482	0.501351	0.228861	0	0	0.036266	1.5522	2.01423	1.41047	0.296428	0.434085	0.380403
VIT_00s0253g00010	Glucan endo-1,3-beta-glucosidase precursor	0.0507332	0	0.0366097	0.179241	0.213596	0	0.0213918	0.0307376	0.0196792	0.0875596	0.0155243	0.0281188	0.13412	0.224138	0.117609	0.0233104	0	0	0.124995	0.085789	0.0360707	0.228509	0.222572	0.0873394	0.0377798	0.0713783	0.0418673
VIT_15s0046g01670	Galactinol synthase	0.0155865	0	0.0153053	0.0818263	0	0.0424597	0.053363	0.0902793	0.103168	0.0161632	0	0	0.0658472	0.0417357	0.0585529	0.0502397	0.0282224	0.0177817	0.0193754	0	0	0.0215969	0.0400552	0.0909921	0.100731	0.177749	0.0213285
VIT_19s0090g00640	Pyruvate decarboxylase 1 [Vitis vinifera]	0.0319252	0	0.0853103	0	0.0911757	0	0.0777827	0.105167	0.0597447	0.117484	0.142201	0.0530893	0.119112	0.130973	0.120764	0.184827	0.0482873	0.147955	0.0329416	0.0963943	0.0384587	0	0.0761224	0.170362	0.148738	0.135066	0.0463657
VIT_03s0063g00410	SRG1 (senescence-related gene 1)	0	0.0680982	0.0164062	0.0221399	0.0275064	0.0224955	0.069278	0.166115	0.301965	0.0459438	0.0508437	0.0468551	0.0159908	0	0.0586892	0.148796	0.026677	0.160794	0.04607	0.068146	0.0348858	0.0460963	0	0.0219272	0.0625474	0.0882242	0.0890599
VIT_02s0025g00610	Alpha-mannosidase precursor lysosomal	0	0.0799355	0.024206	0.048545	0.0405837	0.135712	0.405477	0.215609	0.140142	0.161634	0.250778	0.0469722	0	0.169952	0.155766	0.41562	0.16454	0.160879	0	0.0844871	0.0248944	0.0387347	0.0364913	0.0398173	0.630658	0.451693	0.325741
VIT_06s0009g02720	1,4-beta-mannan endohydrolase	0	0.0308119	0.0116564	21.4934	37.2531	36.5094	121.585	80.0762	59.5305	0.0246195	0.0551549	0	31.3595	23.0451	50.2928	71.382	67.3024	32.4449	0.0146631	0.116683	0.0660311	16.4809	15.1966	25.2459	120.92	31.941	40.4998
VIT_16s0022g01450	Citrate synthase	0	0.103779	0.292672	0.260972	0.348358	0.237063	0.220423	0.141846	0.902408	0.219575	0	0.0810833	0.484486	0.837245	0.175451	0.115391	0.122596	0.187821	0	0.0797173	0.090671	0.450825	0.394301	0.347943	0.673262	0.410718	0.277824
VIT_15s0048g00640	Alpha-amylase	0	0.0267976	0.0217164	0.276266	0.140886	0.104872	0.123756	0.463494	1.13352	0	0.052103	0.0220132	0.144712	0.096276	0.151961	0.138386	0.233608	1.64628	0.0189367	0.021841	0	0.134238	0.105279	0.0655802	0.411597	0.64003	1.02962
VIT_06s0004g03830	Phosphoglucose isomerase, cytosolic	0	0.225321	0.227913	0.248871	0	0	0.09053	0.122784	0.21267	0	0.244477	0	0.412577	0	0.539271	0.452711	0.120268	0.222008	0	0.240087	0.167366	0.101451	0.302054	0.242482	0.179617	0.305947	0.661903
VIT_08s0007g00750	Beta-1,4-xylosidase	0	0.00633143	0.0109495	0	0.00693033	0	0.238456	0.0497463	0.0633901	0.184023	0.120131	0	0.0316826	0	0.00727437	0.369371	0.114688	0.0841858	0.00476933	0	0	0.0071747	0.00621853	0	0.23919	0.150173	0.0567472
VIT_03s0063g00430	Chitinase 1	0	0.0514101	0.017944	0	0	0.0251043	0.122192	0.041502	0.194999	0.0571333	0.0534002	0	0.0396673	0	0	0.417375	0.066176	0.11932	0.0225209	0.0959317	0.0244717	0	0.0613533	0.0271968	0.128789	0.087551	0.075017
VIT_10s0003g05550	Succinate dehydrogenase subunit 3	0	0.0062515	0	0.0229348	0.0304309	0.0281898	0.00764137	0.00880177	0.0461355	0.00308958	0	0	0.00242247	0.0079049	0.0115673	0	0.0136706	0.022919	0	0	0.00289275	0.0128555	0.0146343	0.0748097	0.0193282	0.0184093	0.0139988
VIT_06s0004g04420	Inositol polyphosphate 5-phosphatase	0	0.038345	0	0.192474	0.203559	0.0846482	0.372406	0.609484	0.649097	0	0.0813994	0	0.114232	0.193519	0.214391	0.412986	0.831261	1.65189	0.0218593	0.0857157	0	0.0542423	0.202087	0	0.497459	1.82617	0.924109
VIT_04s0008g05730	SRG1 (senescence-related gene 1)	0	0.0175277	0	0.233701	0.169332	0.150852	0.0259076	0.0998409	0.295856	0	0.00847523	0	0.306053	0.28206	0.149802	0	0.038028	0.252241	0.00683097	0	0	0.449444	0.103962	0.0230856	0.047311	0.0191479	0.258231
VIT_00s0304g00040	Carbohydrate oxidase	0	0.0105157	0	0.0144936	0.156495	0	0.0134562	0.0390383	0.127587	0.0101514	0	0	0.0473334	0.0612338	0.0268545	0.049796	0.124949	0.164334	0.0119137	0.13178	0.0239609	0.0164482	0.144209	0	0.0391227	0.241043	0.258296
VIT_13s0019g04150	Lactoylglutathione lyase	0	0.033154	0	0.1786	0	0.131151	0.259401	0.0996373	0.274836	0.386912	0.952777	0.0304714	0.0632907	0.0832413	0	0.244878	0.101317	0.196195	0.0453257	0.0315188	0	0.121348	0.0449397	0.117792	0.211184	0.334104	0.355689
VIT_13s0019g03300	Sucrose-phosphate synthase	0	0.00482333	0	0.00664793	0	0.0060775	0.007965	0.02594	0.038239	0.0140282	0.171935	0	0.0113327	0.00716533	0.0118976	0.0078249	0	0.0209225	0	0	0.00487653	0	0	0	0.0196172	0.0232289	0.0174693
VIT_18s0089g00140	Beta-galactosidase / lactase	0	0	0.00915367	0	0	0	0.0389623	0.0472327	0.0320276	0.592234	0.52267	0	0.00658913	0	0	0.00980237	0.0435161	0.0168408	0	0	0.0222393	0	0.00722497	0	0.00935607	0.062954	0.0184198
VIT_18s0089g00180	Aldo-keto reductase	0	0	0	5.24893	5.81338	4.0126	6.4464	20.0744	30.5488	0.0387713	0.0272945	0	3.12211	5.78403	6.5906	6.88454	16.2783	30.8958	0.0154922	0.0295655	0.0346625	5.47911	8.11195	3.93624	11.1586	31.0733	26.143
VIT_00s0824g00010	1,4-beta-mannan endohydrolase	0	0	0	0.0462837	0.0397233	0.0182945	0.281923	0.362953	0.141975	0.0138095	0	0	0	0.021161	0.0392407	0.252984	0.228669	0.0594721	0	0	0	0.043249	0.0221538	0.052902	0.586256	0.304308	0.0542675
VIT_00s0324g00060	Beta-primeverosidase	0	0	0	2.36501	1.23603	1.59855	0.176177	0.228727	0.534693	0	0	0	1.79858	2.67067	2.93502	0.696035	0.33306	1.09443	0	0	0.023499	1.7927	2.06941	1.48175	0.197686	0.223057	1.61763
VIT_05s0020g00540	1,4-beta-mannan endohydrolase	0	0	0	0.155507	0.550606	0.960828	1.6705	1.05105	0.668688	0	0	0	0.415812	0.323313	0.779377	1.09055	0.849696	0.281568	0	0	0	0.408319	0.143766	0.800666	2.25379	0.158395	0.868538
VIT_10s0003g05620	1,4-beta-mannan endohydrolase	0	0	0	0.0952279	0.0258975	0.134103	0.220848	0.159925	0.174989	0	0	0	0.131308	0.145742	0.107835	0.256882	0.18941	0	0	0	0	0.0670574	0.0232861	0.229913	0.428109	0.0850365	0.071977
VIT_02s0154g00130	Hexokinase-like protein	0	0	0	0.0688382	0.0126358	0.0898448	0	0	0	0	0.0117126	0.00976857	0.0360418	0.0158956	0.0892829	0	0	0.0136121	0.0086131	0	0.00937923	0.0144007	0.0281546	0.0716548	0	0	0
VIT_05s0062g00960	UDP-glycosyltransferase 85A8	0	0	0	0.025028	0	0	0.124225	0.0836213	0.307569	0	0	0	0	0	0	0.182611	0.0610553	0.288681	0	0	0	0	0	0	0.144529	0.565765	0.119591
VIT_00s0233g00050	Alpha-L-arabinofuranosidase	0	0	0	0	0	0	0.019192	0.0469115	0.0636723	0	0	0	0	0	0.0147908	0.0436337	0.0447683	0.079181	0	0	0	0	0	0	0.0335223	0.0414385	0.0417837
VIT_07s0005g04420	Carbohydrate oxidase	0	0	0	0	0	0	0.0131425	0	0.0164791	0	0.0105615	0	0	0	0	0.0157244	0.0168131	0.013232	0.0119137	0.0113557	0.0139091	0	0.0154031	0	0.0130408	0.0128342	0.0131979

## Sheet: Protein metabolism
Table S5. b) List of genes belonging to the functional category of Protein metabolic process (GO:0044267).
		CVT185									CVT423									CVT71
		E-L31			E-L35			E-L38			E-L31			E-L35			E-L38			E-L31			E-L35			E-L38
GGDB 12X V1 ID	Gene description	V1	V2	V3	V1	V2	V3	V1	V2	V3	V1	V2	V3	V1	V2	V3	V1	V2	V3	V1	V2	V3	V1	V2	V3	V1	V2	V3
VIT_00s0173g00170	Ribosomal protein S7 30S	0.65421	0.53968	0.44203	1.54058	0.518084	1.15362	0.337246	0.45578	0.852929	0.462192	0.650037	0.49984	0.959752	0.873542	0.455751	0.253129	0.554355	1.2038	0.44575	0.711493	0.450496	1.03288	1.00682	2.10986	0.459002	0.428861	0.700836
VIT_00s0174g00190	Ribosomal protein L5 60S	200.2	214.717	151.93	214.617	198.636	194.152	263.102	276.532	255.786	205.579	214.907	174.709	199.371	223.987	185.457	274.127	269.163	274.658	189.229	242.002	152.853	216.663	195.666	213.728	280.027	269.428	226.75
VIT_00s0198g00060	Ribosomal protein S7 30S	0.858007	1.28255	1.0335	2.83718	0.666127	1.57633	0.795696	1.28043	1.82747	1.19446	1.01135	0.873877	1.03794	2.0013	0.957564	0.454344	0.804257	2.38265	1.00496	0.862987	0.639622	1.75083	1.74311	3.85611	0.945834	0.525124	0.897061
VIT_00s0225g00020	Ribosomal protein L27A (RPL27aC) 60S	338.446	327.647	329.581	381.226	394.14	338.182	407.64	416.593	377.856	332.921	340.339	342.278	339.31	350.375	324.018	408.604	353.492	388.32	339.781	382.795	332.399	386.394	325.49	336.296	423.139	361.347	353.116
VIT_00s0246g00150	Ribosomal protein L32	2.94457	1.53751	2.13634	2.90428	0.706885	1.92965	1.06277	1.4877	2.58518	2.21429	1.82556	1.83526	1.03401	1.25663	0.988069	1.43252	1.5427	2.61426	2.21992	1.25559	2.06529	1.88584	1.18336	3.13231	1.12291	1.36561	1.11629
VIT_00s0246g00240	Ribosomal protein S1 (Rps1 protein)	0.281228	0.463877	0.162511	4.29497	1.64146	1.63463	1.56488	1.53184	5.21188	0.473837	0.204226	0.0890576	0.982552	1.76161	0.503989	0.745243	1.52692	4.73214	0.161529	0.262437	0.152841	1.25303	2.50369	4.61063	1.88244	1.88689	1.9616
VIT_00s0252g00090	Ribosomal protein S4	2.27106	2.42293	1.50195	2.28914	2.44472	1.09939	3.20395	1.44308	1.9603	2.16566	2.49674	2.05047	1.32722	1.97828	0.722069	4.08331	2.69944	2.35664	2.15492	3.01257	1.47718	0.88154	1.48693	1.71025	3.60202	3.45561	2.38309
VIT_00s0260g00080	Ribosomal protein L32 60S	329.992	311.826	353.619	106.173	139.496	114.658	89.7927	107.947	78.2771	302.149	323.534	380.097	125.226	87.3375	104.536	90.1258	88.2222	51.0601	320.319	339.642	376.719	91.9331	135.145	123.741	97.0242	83.118	98.885
VIT_00s0265g00080	Ribosomal protein L21	22.8223	18.6698	22.9031	32.8648	37.3753	30.3733	41.6871	44.3442	37.6704	21.6311	17.5673	21.7566	35.5243	34.7583	42.0063	38.047	40.1713	40.2658	26.8992	17.1953	23.1012	33.8103	32.4165	29.9197	45.6584	33.4743	41.5912
VIT_00s0317g00130	Ribosomal protein L35 (RPL35B) 60S	580.784	617.676	499.571	325.097	334.167	320.911	301.193	319.892	310.737	591.913	590.105	528.032	342.396	336.839	289.272	301.377	290.759	338.056	597.063	705.066	558.238	363.068	303.391	374.763	335.422	305.248	303.741
VIT_00s0337g00060	Ribosomal protein S8 (RPS8A) 40S	88.4378	84.8997	63.2	93.753	84.435	81.0345	95.1586	93.4237	92.495	92.7123	81.4076	74.535	94.4426	106.926	85.1903	97.0993	85.6374	122.006	90.3787	103.7	68.9151	104.104	85.6921	89.1246	95.6306	93.3282	95.9079
VIT_00s0396g00050	Ribosomal protein S4, Mitochondrial	0.440247	0.444507	0.261872	7.27892	2.17521	3.25835	2.67219	3.06424	8.38463	0.340859	0.318066	0.24213	1.70319	2.95834	0.722303	1.72703	2.5558	8.183	0.189471	0.303412	0.257036	2.85886	3.74825	8.30192	2.7522	2.61825	2.57152
VIT_00s0551g00020	Ribosomal protein L15e	423.847	428.378	381.732	167.588	201.071	173.767	149.255	178.099	159.532	380.106	394.285	386.662	175.992	154.043	172.646	148.681	159.287	143.375	431.232	524.711	412.196	166.981	186.813	199.357	164.9	160.294	188.156
VIT_00s0616g00020	Ribosomal protein L19	87.313	93.6291	78.9638	32.419	27.1011	40.1474	12.7815	15.2897	18.1698	91.7366	81.8525	74.8894	38.4149	29.2109	33.1558	11.5069	12.9552	18.5974	88.407	107.753	86.984	34.5369	28.1756	41.268	10.6984	10.8623	20.5887
VIT_00s0742g00020	Ribosomal protein L23	50.3261	52.4345	36.5762	49.7359	44.4657	43.301	49.2677	48.1201	54.2302	55.2029	51.1193	41.3298	47.7664	52.1041	46.7925	50.6275	45.3759	66.5531	46.356	57.4038	37.8827	47.3766	40.857	48.9361	48.2132	44.2816	53.8164
VIT_00s0838g00020	Ribosomal protein S5	36.8862	33.7046	44.6473	29.0991	21.8481	36.0488	30.6011	28.7707	31.2836	43.383	26.3772	40.2498	30.808	28.3376	32.4129	27.4642	25.0139	26.4695	37.5571	34.1123	47.8284	27.2598	21.5743	36.4802	30.5007	20.5517	30.5087
VIT_00s0873g00010	Ribosomal protein L2	15.8195	12.9872	8.41287	71.802	42.0173	42.2209	73.4494	83.4368	87.2634	14.5385	14.2006	6.39529	30.855	59.7567	33.4912	58.5225	90.1586	80.5476	8.03141	7.11367	6.54858	42.9064	29.9339	48.1113	69.7583	79.1981	116.423
VIT_00s1232g00020	Ribosomal protein L12	16.3279	10.3903	19.7778	16.0944	18.5019	13.0288	24.4258	28.3779	29.7755	11.1695	9.6197	19.0475	16.0236	13.0845	14.4829	23.6418	27.6083	27.5579	15.8371	10.5027	21.7648	13.7625	14.4917	14.146	25.2301	32.3276	28.2815
VIT_00s1247g00020	Ribosomal protein L25	14.8437	14.454	11.5482	8.01609	8.93591	9.2173	6.44777	6.43518	9.26445	13.7771	15.6263	15.217	6.74914	7.00059	8.02937	6.69376	7.48449	12.1155	17.5698	17.8833	12.3002	7.21802	9.43183	8.25895	5.58567	7.3355	11.7399
VIT_00s1707g00010	Ribosomal protein S8, Chloroplast 30S	1.63081	1.35979	1.69671	4.00872	0.931528	2.29975	2.69076	2.05742	4.09293	1.97601	1.35043	1.57237	1.97538	3.26864	1.63213	1.40455	2.13134	6.70456	1.49653	1.07057	1.12352	2.33467	2.27378	4.41754	2.13616	1.71175	2.60893
VIT_00s1897g00010	Ribosomal protein L21	14.5437	9.04123	12.7767	15.0965	18.077	12.9608	22.3057	24.3685	17.3641	10.5106	7.64923	12.2699	16.3534	8.16101	19.4119	22.5713	22.1327	7.80361	14.3415	9.04456	13.9256	10.9274	16.3764	12.5251	26.8798	23.3397	25.1139
VIT_00s2478g00020	Ribosomal protein L12 (gb|SCL121A)	5.24702	3.79557	5.91919	5.35616	5.28849	5.47594	12.2432	8.16334	8.1677	4.51757	3.48192	5.31114	5.68426	5.34065	5.62261	11.5923	8.97956	9.55615	4.85395	4.18913	5.08574	4.84868	5.40849	4.88037	10.857	9.10233	9.8774
VIT_01s0010g03370	Ribosomal protein L17-2 60S	99.4292	102.835	77.7566	56.8795	56.8043	59.8982	38.8722	45.6155	50.1207	100.594	99.7071	84.4818	58.0463	56.2341	56.7536	44.8421	47.6243	54.9303	99.465	116.975	78.7698	60.2708	57.5717	65.3073	40.51	46.3955	53.1089
VIT_01s0010g03380	Ribosomal protein L17 (RPL17B) 60S	239.775	256.986	226.559	136.484	153.757	127.356	112.185	146.022	124.379	239.061	262.013	242.911	139.539	125.853	114.139	111.171	110.976	135.194	238.369	277.19	235.922	145.679	136.502	142.773	122.537	117.344	130.331
VIT_01s0011g00680	Ribosomal protein S19 (RPS19A) 40S	153.064	146.457	125.035	87.5907	101.82	74.3476	81.6029	80.1561	68.4121	134.171	142.501	132.003	94.2806	87.0992	70.0453	85.3242	72.9981	65.7773	154.301	170.007	136.612	94.9686	92.3628	84.135	85.9285	75.7674	71.2733
VIT_01s0011g01820	Ribosomal protein L27 (RPL27C) 60S	246.567	218.658	252.141	181.671	289.501	191.505	321.166	352.524	281.771	200.07	228.549	258.151	239.383	156.621	210.792	301.023	320.463	194.116	283.904	306.78	242.905	140.877	279.45	164.595	327.575	315.224	347.07
VIT_01s0011g02080	Ribosomal protein L36a/L44 (RPL36aB) 60S	6.43572	6.66349	4.24764	4.87641	5.22689	3.29523	3.47751	4.33115	4.16758	7.80811	7.04634	5.691	5.2817	5.13153	3.60996	3.45065	4.21279	5.07163	6.96538	7.44604	4.28502	4.38202	4.25406	3.92235	3.40278	4.54946	4.8297
VIT_01s0011g02090	Ribosomal protein L36a/L44 (RPL36aB) 60S	111.951	106.934	102.246	90.2692	94.2015	82.3831	94.5635	102.27	95.5727	105.091	103.093	102.566	87.393	84.3688	91.1248	93.8542	92.851	93.2179	115.527	129.515	104.191	80.2098	95.0805	83.1442	105.635	102.278	91.1828
VIT_01s0011g03590	Ribosomal protein L15, chloroplast (CL15) 50S	68.7164	66.9417	66.8218	30.2746	23.2962	33.8933	12.1128	15.6427	16.8204	64.7261	52.5853	56.4593	35.5117	26.3207	29.5032	11.9913	14.7049	16.6428	70.9063	71.4478	71.8036	32.3094	25.3824	34.4347	12.7408	11.4924	19.4601
VIT_01s0026g02110	Ribosomal protein S9 (RPS9C) 40S	138.679	129.013	107.77	110.95	129.265	102.075	145.523	167.288	157.493	126.156	121.09	121.017	116.378	104.513	106.67	146.439	165.107	138.208	140.357	160.857	106.078	102.619	115.235	107.022	163.757	169.294	162.936
VIT_01s0026g02410	Ribosomal protein L34 (RPL34A) 60S	261.284	253.801	210.578	175.453	173.629	173.076	176.676	184.341	164.284	263.812	240.867	231.623	180.386	186.971	163.804	190.987	168.865	163.771	261.886	283.057	218.782	174.298	176.171	189.411	195.902	171.734	165.867
VIT_01s0150g00310	Ribosomal protein S27 (ARS27A) 40S	1217.95	1197.22	1208.74	589.65	636.163	595.019	577.635	645.76	501.152	1130.68	1095.87	1158.72	582.706	517.873	520.125	586.625	497.24	430.344	1081.84	1392.23	1233.28	552.524	586.097	652.072	639.052	491.021	534.067
VIT_01s0150g00520	Ribosomal protein L21 (RPL21E) 60S	128.79	119.884	114.03	72.5144	83.9965	70.4074	36.0817	46.3399	41.6881	119.462	105.69	125.356	90.3225	81.6934	76.4255	43.1228	50.8659	52.4422	120.233	128.099	115.698	77.6118	83.3818	70.7734	47.1456	43.3486	50.3226
VIT_01s0150g00580	Ribosomal protein L10 (RPL10B) 60S	96.2484	91.8674	58.585	48.5342	61.5965	41.8732	52.7914	58.6094	54.2395	90.9157	91.4333	82.9623	51.4047	53.8339	44.6593	55.7311	60.3193	61.7909	105.352	115.028	65.1054	54.1856	49.8931	54.1115	57.6414	62.6282	58.8655
VIT_02s0012g00100	Ribosomal protein L37a (RPL37aB) 60S	153.224	155.978	111.253	170.918	145.572	164.603	183.059	171.687	204.116	160.571	163.027	138.02	170.229	231.229	158.968	183.748	162.014	282.859	161.707	183.63	113.863	205.012	143.175	166.778	194.956	165.229	162.917
VIT_02s0012g03140	Ribosomal protein S7 30S	0.365632	0.546504	0.586317	1.40735	0.535704	0.700915	0.363642	0.527683	0.90481	0.360701	0.441502	0.284082	0.581027	0.519525	0.41842	0.155488	0.347795	1.1079	0.376332	0.514566	0.353941	0.565115	0.859765	1.98855	0.402037	0.300737	0.451329
VIT_02s0025g00310	Ribosomal protein S10 (RPS10C) 40S	210.516	205.767	182.873	105.566	127.376	101.24	51.4728	67.6386	57.9439	191.233	210.79	196.82	110.366	109.055	98.0779	60.5419	77.7274	64.8275	211.615	268.102	184.255	105.436	121.836	105.664	68.5221	83.1829	67.5051
VIT_02s0025g00620	Ribosomal protein L25	4.25822	3.48094	5.5016	4.1704	4.15376	3.63156	5.825	4.49103	5.72305	3.57423	2.77566	4.6885	4.21759	3.80949	4.99221	5.26018	5.83721	6.04432	5.05282	3.11374	5.38192	4.08514	4.41246	4.24752	4.87112	5.27126	5.8342
VIT_02s0025g02000	Ribosomal protein S6	37.9652	36.5769	35.8434	19.327	18.0478	23.8412	13.5656	11.2869	12.7225	44.4363	32.4196	35.032	25.2825	17.9634	19.6472	13.2388	11.6513	9.67976	38.6073	39.1364	38.3342	22.667	17.6707	25.2166	14.0468	8.82034	14.6757
VIT_02s0025g02780	Ribosomal protein P1 acidic 60S	634	625.291	612.409	545.312	562.109	544.374	370.9	419.672	372.762	590.499	585.197	600.808	528.547	497.458	509.805	392.397	373.502	344.934	603.218	745.202	632.623	543.873	551.59	582.365	384.364	354.942	412.76
VIT_02s0025g02890	Ribosomal protein L11	31.1978	29.5603	20.4897	6.45807	5.78669	7.85551	6.48143	6.82369	7.33345	35.782	27.1337	18.4563	7.99407	6.301	7.54292	4.8605	6.8559	7.22098	34.7783	28.6971	20.4721	7.40284	5.79105	7.97807	6.05733	5.94258	8.69348
VIT_02s0025g03970	Small subunit ribosomal protein S1	15.7419	17.611	23.8633	19.8033	16.6537	25.3743	23.3638	23.9036	19.1314	17.2889	16.8571	21.1264	20.9035	21.9671	21.2542	24.0289	23.0928	20.1735	15.205	17.0786	23.4981	23.817	17.8098	25.6954	26.0648	21.8058	19.165
VIT_02s0087g00590	Ribosomal protein L30	11.9376	11.4597	9.32582	9.57448	10.1	8.85095	8.48708	10.1895	7.82199	11.7951	10.2841	10.3603	10.6471	8.19456	8.47505	8.84411	10.0929	7.49268	12.2081	10.7058	9.63538	10.5051	9.90039	9.94346	10.9053	7.97985	9.32044
VIT_03s0017g01790	Ribosomal protein L20	20.7462	17.6147	17.1986	23.4621	19.9022	21.3437	27.7217	29.9561	28.0546	20.5135	13.8619	15.7684	22.8861	23.0112	25.0564	27.4562	33.3966	32.2836	17.5448	15.9171	14.2551	21.9651	20.7745	22.223	26.596	31.3132	24.3063
VIT_03s0038g02780	Ribosomal protein L23	1.77237	1.85825	1.17252	3.53997	0.816297	1.78413	1.26159	1.85601	4.317	1.1312	1.866	1.23131	1.6533	2.14914	1.10299	1.07428	1.63689	5.11414	1.62467	1.99334	1.55136	2.1058	1.72753	4.60258	2.15127	1.20634	1.61025
VIT_03s0038g04560	Ribosomal protein S25 (RPS25E) 40S	399.047	379.949	364.441	382.14	446.285	350.378	484.048	481.429	397.251	385.956	390.551	388.334	408.139	340.974	363.233	513.724	451.736	358.607	387.251	482.162	372.777	366.375	428.038	374.105	555.844	475.184	415.188
VIT_03s0063g00130	Ribosomal protein S16 (RPS16A) 40S	288.322	290.496	221.644	211.431	333.74	202.808	220.665	235.166	201.61	271.006	292.466	235.767	231.065	183.481	194.348	216.388	216.37	162.259	286.117	357.854	240.945	189.139	268.555	222.395	213.27	202.009	248.28
VIT_03s0063g02580	Ribosomal protein L27	39.9709	42.8802	33.3853	38.5634	31.0772	41.0255	40.9563	43.9924	42.4868	43.9985	40.8291	35.0599	39.0143	39.2504	36.5119	43.3802	43.7404	43.2433	40.8331	44.4381	34.2184	37.066	36.0898	44.894	40.0655	38.8623	40.481
VIT_03s0091g00640	Ribosomal protein S29 (RPS29C) 40S	90.5151	75.858	70.3836	44.3827	70.0042	54.8189	64.3965	64.0891	56.6459	75.423	83.237	87.6541	55.7299	37.073	55.3412	63.8284	60.1912	30.9445	96.2412	87.9614	83.2619	41.3107	64.3014	52.4721	72.3916	65.7354	64.538
VIT_04s0008g00790	Ribosomal protein L28 (RPL28C) 60S	63.3508	60.2511	38.847	32.6007	34.1279	23.2729	37.0995	41.0061	44.055	60.7018	53.0769	55.6077	35.9468	36.4374	25.2392	45.5613	48.3861	66.0407	72.8345	58.7721	42.427	38.5225	29.8306	30.3706	40.9046	49.4341	42.1147
VIT_04s0008g01750	Ribosomal protein S3 (RPS3C) 40S	61.4227	54.8298	42.0714	61.1211	61.6021	59.1735	55.6379	52.0335	59.3672	49.4897	53.193	49.6179	61.8524	68.4675	62.1156	58.6307	51.4052	67.3585	60.1557	64.7332	45.4262	63.7945	63.673	61.5865	58.8694	47.6797	59.3814
VIT_04s0008g03900	Ribosomal protein L37 (RPL37C) 60S	260.221	233.835	201.166	176.117	281.398	174.307	157.759	195.145	150.91	217.527	217.278	209.11	213.544	142.331	165.821	161.251	159.466	97.2406	256.456	331.561	214.372	165.695	257.377	185.96	171.113	154.514	179.428
VIT_04s0008g06030	Ribosomal protein L39 (RPL39C) 60S	309.769	322.419	260.077	271.984	263.774	274.093	262.811	292.812	300.211	325.986	323.742	271.06	267.238	262.718	264.315	265.683	284.623	312.557	325.172	359.314	258.996	275.209	260.784	317.98	276.058	312.905	287.066
VIT_04s0008g06220	Ribosomal protein S11 (RPS11C) 40S	415.025	443.653	316.482	270.488	317.979	284.171	237.432	268.12	255.753	414.866	418.849	366.135	299.2	260.026	260.772	245.658	241.582	230.949	429.31	523.98	341.233	273.976	304.042	325.205	264.169	248.399	266.844
VIT_04s0023g00850	Ribosomal protein L25	4.7785	3.7197	6.06168	6.41225	5.53762	6.12566	9.37417	8.48413	9.05743	4.34334	3.25749	5.14265	6.88734	6.19725	6.70252	9.63319	9.41612	10.5537	4.68068	2.9904	5.96796	5.89536	6.37711	6.56722	8.79032	9.2327	7.70677
VIT_04s0023g00930	Ribosomal protein L38 (RPL38B) 60S	335.155	325.748	284.736	146.867	189.553	137.145	197.494	207.583	149.168	309.223	309.011	294.659	163.052	118.574	136.229	206.255	181.407	96.035	349.767	382.483	320.259	133.327	169.362	157.886	225.633	195.504	153.237
VIT_04s0023g01810	Ribosomal protein L6	28.3142	22.9889	22.211	23.3834	27.5055	26.9218	29.9433	28.9268	28.6042	27.8405	20.988	25.6317	29.0123	24.9834	24.1307	33.7392	30.3251	29.4929	26.5772	31.0081	24.5827	21.9034	24.6893	28.3162	31.9616	30.12	29.4812
VIT_04s0023g02590	Ribosomal protein L12	16.1604	14.9102	13.9117	14.4153	12.6346	13.1862	22.6857	17.6361	19.4388	15.0917	14.8953	16.8804	13.4643	13.2594	14.327	23.0128	19.804	23.1675	15.7038	15.2205	15.1909	12.9748	12.8742	14.3631	21.9638	20.5059	18.4886
VIT_04s0023g03210	Ribosomal protein L8 (RPL8C) 60S	318.524	327.209	329.3	275.631	358.835	244.337	198.949	218.56	191.073	284.594	323.321	339.457	266.102	231.768	240.898	189.36	184.439	175.716	305.856	428.608	331.828	260.181	282.989	268.525	199.064	170.717	221.772
VIT_04s0043g00440	Ribosomal protein S5 (RPS5B) 40S	149.523	132.043	125.306	62.8371	84.0464	63.4889	81.0746	73.7684	54.5807	130.52	123.78	133.293	74.3756	53.7154	63.8281	85.3909	76.091	46.8305	153.46	148.024	129.407	57.3304	79.0005	76.0506	88.756	73.141	58.6441
VIT_04s0044g00980	Ribosomal protein L17	22.54	26.9404	7.15596	11.8525	11.1308	9.20266	10.5199	13.9908	17.5456	25.4095	29.0461	17.0107	12.4193	11.5113	8.08648	12.9911	12.8315	16.9133	20.7035	29.5796	7.29535	12.4051	11.0706	9.66467	11.8583	13.3795	16.1359
VIT_05s0020g00810	Ribosomal protein L3	18.6273	17.3682	13.7998	19.6551	18.9487	17.058	26.6681	19.513	19.7027	18.2127	15.4686	15.6794	21.3003	18.0424	15.5278	27.4503	19.9979	20.4239	20.8894	15.9916	14.4627	19.9834	17.7873	20.0909	26.9143	20.3551	18.1409
VIT_05s0020g01140	Ribosomal protein L18	49.4569	48.1933	51.7577	16.9242	20.3949	24.2956	3.88216	6.37425	7.92344	58.5082	44.915	49.1839	23.601	17.4644	21.2364	3.79343	6.19163	7.86406	54.081	56.3347	54.3637	19.8433	19.9547	29.2435	4.55776	4.64026	13.7456
VIT_05s0020g01480	Ribosomal protein S21 (RPS21C) 40S	95.7603	109.513	86.3317	86.1899	75.2604	89.6243	77.8778	84.6682	91.5124	110.276	114.576	100.078	83.9626	91.5469	82.2289	82.6363	76.6111	99.4262	85.659	113.218	87.1457	86.6865	74.4749	99.4683	84.2286	83.2933	78.8808
VIT_05s0020g02990	Ribosomal protein S16 (RPS16C) 40S	261.232	228.595	229.523	142.866	246.711	148.137	131.278	147.969	128.05	216.93	237.809	251.407	173.789	119.743	158.325	135.902	128.788	91.5967	289.917	305.116	230.923	131.041	202.6	149.12	143.528	124.563	165.569
VIT_05s0020g03450	Ribosomal protein S18 (RPS18C) 40S	337.919	317.872	292.166	194.005	227.999	188.994	212.783	190.089	143.416	298.88	288.691	300.742	219.847	159.733	174.003	212.997	168.816	114.583	342.148	325.161	315.184	190.071	221.767	226.767	221.651	156.697	154.147
VIT_05s0020g03480	Ribosomal protein L18P/L5E	1.66583	1.88536	2.37111	3.24539	3.10866	4.73397	2.13739	2.36332	3.1128	2.11432	2.37099	2.28557	2.80215	3.94265	5.40901	2.35514	2.46074	3.95914	1.97481	1.92708	2.50423	3.53664	3.36487	5.10621	2.21294	2.20831	3.29107
VIT_05s0020g03900	Ribosomal protein S3A (RPS3aA) 40S	35.4767	37.1998	15.1264	10.0778	11.3791	7.86002	6.70611	8.93559	9.72847	37.6893	39.9501	23.228	10.9553	8.77454	6.56785	6.7704	7.59626	9.70862	38.3042	46.3109	16.5407	10.1473	8.5683	8.55645	8.21198	9.43428	9.84207
VIT_05s0020g04790	Ribosomal protein S15 (RPS15D) 40S	305.701	283.056	257.654	210.086	289.893	207.168	304.404	294.883	224.756	262.519	291.519	286.948	249.838	198.941	212.183	321.266	283.973	199.288	327.791	332.354	267.948	196.239	279.791	231.227	318.587	284.328	258.797
VIT_05s0029g00020	Ribosomal protein L13A (RPL13aD) 60S	483.699	496.26	480.958	319.852	367.645	305.292	271.133	321	276.385	437.682	477.359	482.901	322.846	311.001	264.813	279.806	281.694	274.059	468.214	612.179	488.544	334.284	295.748	324.233	299.465	262.257	281.998
VIT_05s0049g01310	Ribosomal protein L14 (RPL14B) 60S	133.766	130.723	112.648	103.895	114.754	96.9702	88.7233	96.0508	86.235	134.673	128.535	120.348	111.099	107.007	95.9025	96.2713	87.7602	91.3931	138.228	132.324	121.203	113.642	101.486	119.782	97.342	86.074	92.6515
VIT_05s0049g01480	Ribosomal protein L28, chloroplast (CL28) 50S	72.7615	79.7009	71.4458	26.459	20.6762	32.8666	6.08049	7.4639	8.36824	79.3937	71.6362	60.5576	26.6891	22.2042	27.388	6.06449	6.96476	10.0157	72.7528	89.4084	74.5781	25.988	21.5018	35.257	6.43018	6.35334	13.5056
VIT_05s0049g01790	Ribosomal protein L23 (RPL23C) 60S	718.006	616.401	644.114	455.753	604.767	504.215	498.542	533.084	444.94	596.776	552.109	625.761	498.85	386.706	446.839	490.846	471.939	340.716	683.945	775.249	642.088	426.07	525.965	559.153	511.316	489.735	468.707
VIT_05s0062g00120	Ribosomal protein S8 (RPS8B) 40S	41.2489	42.8472	27.752	18.925	21.7478	18.0629	31.9446	26.3184	24.0739	38.2148	38.7898	35.8927	19.9869	19.8841	14.599	34.2725	26.815	29.0524	42.8954	58.4945	28.8591	19.0657	19.3778	20.18	32.4584	28.0721	23.154
VIT_05s0062g00830	Ribosomal protein S1	26.0382	25.2285	29.749	32.983	27.7949	27.3993	14.9063	18.3966	18.7722	27.9951	20.3111	25.333	37.8641	26.3136	24.4464	15.0442	17.98	15.1853	25.2468	22.7202	30.8701	30.1669	29.9069	22.9292	15.0689	17.9186	17.8245
VIT_05s0062g00880	Ribosomal protein S11	22.6678	21.7304	16.1789	21.1169	20.6456	19.2153	28.0472	25.7695	25.8512	23.5172	22.3049	19.191	20.3796	21.9523	19.3937	27.7703	23.4853	28.2748	23.3661	21.6064	16.1618	21.1705	18.9686	20.6238	28.0954	24.7808	23.5986
VIT_05s0077g00450	Ribosomal protein S1 30S	39.2275	34.78	48.3216	59.1558	46.5541	63.395	16.4871	20.7483	24.9226	40.1967	29.4864	39.7973	59.6423	50.7135	61.2504	17.6034	20.7811	26.339	39.2893	34.7335	49.9458	55.8044	52.142	58.5485	17.4878	17.1346	25.7333
VIT_05s0077g00590	Ribosomal protein S6, 30S RFC3 (regulator of fatty-acid composition 3)	23.1913	28.3962	21.405	13.7151	13.2883	12.7713	16.034	13.3785	16.2686	27.6407	27.2393	24.475	15.7006	13.9418	10.2032	15.6217	14.3481	16.3213	21.4094	27.188	19.9524	16.5145	12.7039	13.7994	15.4212	12.3692	13.4536
VIT_05s0077g01220	Ribosomal protein L29 (RPL29B) 60S	947.588	958.834	911.243	606.028	607.187	517.419	583.336	576.394	475.882	903.732	845.335	878.631	604.911	557.969	527.256	600.634	509.931	528.433	893.824	1036.39	1026.53	598.999	507.816	576.794	616.228	538.907	489.372
VIT_05s0077g01840	Ribosomal protein L19 (RPL19A) 60S	575.206	584.395	532.546	288.568	309.955	267.623	154.799	193.605	169.782	528.649	531.032	544.224	287.371	283.949	251.896	160.832	165.642	164.167	538.97	664.475	561.511	304.825	274.796	309.315	171.559	159.73	194.591
VIT_05s0077g02060	Ribosomal protein L18 (RPL18B) 60S	265.23	265.189	235.282	217.466	192.92	227.911	164.908	169.585	144.663	249.921	238.415	254.487	228.854	206.854	188.187	189.126	157.973	152.986	262.554	294.725	240.995	230.561	193.442	262.021	179.951	151.578	150.212
VIT_05s0077g02070	Ribosomal protein L18 (RPL18B) 60S	386.518	360.222	351.441	273.81	357.209	279.101	250.574	255.276	208.751	319.795	330.943	369.878	329.378	264.978	255.605	257.05	226.87	161.848	416.4	459.24	354.835	263.864	341.423	299.529	258.561	223.775	236.463
VIT_05s0077g02290	Ribosomal protein L22-2 (RPL22B) 60S	246.061	221.805	232.394	179.525	190.557	183.246	185.085	207.395	188.603	214.487	205.471	223.219	180.548	141.625	167.914	181.751	172.661	136.663	230.318	247.24	231.268	161.616	185.687	196.53	200.913	179.17	200.391
VIT_05s0094g00450	Ribosomal protein L51/S25/CI-B8	21.8323	20.9379	18.0969	29.2843	27.2882	25.8818	42.3197	38.6022	44.4435	23.3993	19.8186	20.5856	30.969	33.7685	24.3387	46.2255	39.3662	50.8189	22.0832	22.2844	18.5013	30.8455	27.0441	27.8307	47.1146	39.3948	36.309
VIT_05s0094g00870	Ribosomal protein L5 (RPL5B) 60S	285.929	287.88	228.552	198.018	214.998	186.742	144.126	143.667	134.023	294.658	274.686	254.964	217.783	217.451	178.747	153.909	144.474	148.309	296.895	305.24	238.991	223.609	202.459	219.977	156.791	141.18	136.445
VIT_05s0094g01100	Ribosomal protein L2	26.8462	26.0421	25.117	15.8598	15.6777	15.4021	7.28438	7.61128	6.20007	24.556	23.3368	25.1967	15.8976	12.3541	13.1828	6.68758	7.66825	7.59171	25.2072	28.5546	25.9726	17.3502	14.2947	17.3824	7.03614	6.3932	8.2132
VIT_05s0102g01220	Ribosomal protein L38 (RPL38B) 60S	319.971	263.98	285.236	138.739	174.767	154.485	180.449	186.138	161.582	251.646	221.844	261.818	169.255	110.763	157.531	192.977	174.242	110.657	306.565	313.103	296.927	125.944	186.168	159.704	194.208	185.434	169.04
VIT_06s0004g00360	Ribosomal protein L4/L1 (RPL4A) 60S	148.872	143.558	131.094	129.929	152.64	115.999	147.183	132.462	132.131	143.001	161.879	155.522	128.646	136.058	128.559	143.209	129.947	142.503	160.329	180.532	136.033	129.555	131.831	125.638	148.461	132.377	138.195
VIT_06s0004g00820	Ribosomal protein S2; Squalene/phytoene synthase	0.696283	0.624301	0.381273	0.504459	0.716595	0.404161	2.44591	1.56242	1.48711	0.633703	0.706555	0.37824	0.56953	0.510543	0.407184	2.83916	1.96488	1.91352	0.702224	0.759849	0.302164	0.714077	0.481092	0.648485	2.51772	2.24198	1.20397
VIT_06s0004g03410	Ribosomal protein S23 (RPS23B) 40S	39.1846	44.6119	19.9891	29.9671	28.2919	25.5925	24.079	28.7094	37.8028	46.69	46.8499	29.7056	29.1897	34.6012	25.8383	25.2667	27.7681	48.0878	41.2826	45.2904	20.4473	34.1245	27.9588	27.3241	23.9337	27.7089	34.0689
VIT_06s0004g04020	Ribosomal protein L35 (RPL35D) 60S	138.932	121.764	119.9	122.58	132.512	126.462	104.244	110.845	101.768	137.246	115.887	125.311	129.241	112.786	109.883	112.214	105.752	104.478	140.214	154.644	121.703	124.255	126.636	121.377	112.998	101.264	113.091
VIT_06s0004g04090	Ribosomal protein L23A (RPL23aA) 60S	66.3362	68.1285	59.9137	67.1112	58.0509	61.1521	68.705	86.473	83.2745	76.8058	67.2291	61.5997	57.6004	54.8909	57.7748	66.5133	75.3233	79.5917	62.2912	69.9649	56.5962	54.8449	55.5371	61.5129	63.0379	72.1633	83.5976
VIT_06s0004g06140	Ribosomal protein L4	29.2611	22.7049	29.5972	24.4346	17.8186	28.373	18.0116	15.7288	16.6398	30.1123	21.2065	29.8425	24.4445	18.2313	24.7446	16.6883	14.1896	16.8776	29.1528	21.9148	31.9256	20.9108	17.7281	25.0384	18.0733	10.3445	17.5791
VIT_06s0004g06690	Ribosomal protein S18 30S	28.1836	28.7692	21.9032	36.9196	27.3336	39.2946	53.2818	47.4201	52.0759	29.1804	26.0632	23.1824	33.274	39.1805	36.4789	53.559	49.1863	55.2005	25.5619	27.8715	20.3843	38.4213	30.6035	40.7334	51.4005	50.8084	41.4186
VIT_06s0004g07150	Ribosomal protein S4 (RPS4D) 40S	216.342	216.972	163.476	137.559	158.556	127.342	117.768	132.025	127.447	200.902	221.3	196.507	152.052	140.61	133.119	119.111	123.968	122.453	230.848	263.911	177.193	135.107	156.57	148.274	125.039	124.176	142.339
VIT_06s0004g07560	Ribosomal protein S29 28S	8.67967	7.1747	7.75433	64.7189	71.2319	35.2202	69.1613	79.8108	70.9382	9.91138	7.94339	8.41352	65.2334	65.8988	47.7895	64.3532	66.6356	56.8764	8.57701	7.75012	7.72051	70.6913	68.4709	36.2427	72.5094	56.9392	64.4733
VIT_06s0004g07940	Ribosomal protein S26 (RPS26C) 40S	323.024	343.661	265.28	331.621	335.843	329.978	265.605	338.532	418.931	316.891	343.098	271.187	327.565	293.687	355.528	259.57	303.218	433.313	313.222	390.46	271.874	351.407	349.513	339.308	272.026	323.905	468.067
VIT_06s0004g08260	Ribosomal protein L10 (RPL10B) 60S	596.654	556.437	520.917	567.591	662.33	557.415	654	684.527	621.871	530.155	516.661	525.351	576.76	586.964	549.017	647.473	662.104	610.359	639.485	631.391	530.207	562.403	617.975	601.025	682.485	731.386	580.327
VIT_06s0061g00430	Ribosomal protein L18	15.6379	16.5668	14.3088	13.8119	13.7972	14.8123	23.2295	21.0452	20.0294	16.8364	16.7088	16.6735	14.3297	13.8456	15.3801	23.6849	19.8459	19.7681	14.439	16.3523	14.4266	14.506	13.6359	14.1139	21.7585	18.7176	18.687
VIT_06s0061g00770	Ribosomal protein L9, chloroplast (CL9) 50S	37.9615	35.5561	41.2441	12.1997	9.50106	15.7703	3.73667	5.71337	9.09968	37.9219	31.9326	35.6301	13.9073	13.6171	13.6245	3.27865	5.51133	11.8923	38.5923	35.678	43.053	15.117	10.1645	16.0841	3.70365	5.42058	9.8212
VIT_06s0061g01330	Ribosomal protein L24 60S	34.7053	34.1341	26.6116	24.2831	23.3681	21.5795	19.2525	22.34	24.8769	30.887	30.5051	27.3526	21.3918	21.8784	21.0959	18.4205	21.7402	26.066	31.2188	35.9667	28.2367	21.8174	22.6398	23.4684	18.5342	23.8967	24.4956
VIT_06s0061g01600	Ribosomal protein P2 60s acidic	305.021	274.871	241.225	225.868	280.011	243.168	332.211	329.633	302.986	276.509	275.185	269.668	275.446	248.693	242.706	358.516	321.368	290.07	336.063	344.943	244.243	227.53	278.554	255.412	356.64	337.714	304.885
VIT_06s0080g00400	Ribosomal protein L10A (RPL10aA) 60S	156.143	164.907	115.278	149.921	145.299	121.476	131.15	149.037	150.431	156.14	152.239	140.246	148.073	164.039	119.163	140.235	146.662	156.905	150.863	170.067	119.036	152.65	143.093	134.872	134.451	151.711	138.421
VIT_06s0080g00440	Ribosomal protein S9	13.1173	13.8058	9.81139	10.5522	10.0172	10.0758	15.8913	16.0776	20.3747	14.7881	14.0085	10.5944	10.8278	10.8206	11.5802	13.3782	17.5624	21.117	13.5498	13.7753	8.95474	10.4637	10.5046	9.90058	13.3466	18.1551	18.2931
VIT_06s0080g00740	Ribosomal protein S14 (RPS14C) 40S	219.172	205.075	170.406	133.572	163.382	135.134	169.32	171.823	154.386	209.208	193.797	176.075	157.386	121.342	141.593	181.56	171.09	126.293	227.113	259.438	173.333	124.152	157.413	168.683	178.07	169.143	174.505
VIT_07s0005g00540	Ribosomal protein S12 (RPS12C) 40S	0.783474	0.882878	0.395742	0.826641	0.547317	0.622786	1.53522	1.51073	1.1895	0.89119	0.667419	0.37434	0.862409	0.450985	0.310909	1.92728	0.954961	1.33694	1.28025	1.47174	0.57398	0.34609	0.500547	0.647995	0.901119	0.979032	1.21444
VIT_07s0005g00560	Ribosomal protein L22 (RPL22C) 60S	151.984	149.729	133.531	88.1395	119.472	82.8769	96.1121	82.8092	70.3305	132.025	136.717	148.594	106.252	92.6106	89.1401	99.6942	85.3948	77.2226	159.304	179.719	144.24	91.9193	107.258	91.5747	92.8722	79.4012	79.2571
VIT_07s0005g00690	Ribosomal protein L18 (RPL18B) 60S	68.053	58.4989	62.951	29.801	40.9913	35.0364	16.9482	18.45	16.9527	59.0438	54.327	54.3704	32.3911	22.347	30.1998	18.531	15.3713	12.1126	63.3684	73.3446	55.4164	26.6987	39.5034	32.9695	18.678	13.1378	23.7265
VIT_07s0005g00840	Ribosomal protein L19 (RPL19B) 60S	412.444	430.098	431.113	290.005	282.7	292.069	238.31	243.341	267.42	387.129	411.5	479.443	284.077	300.305	295.57	238.023	251.544	340.571	426.546	526.383	461.174	319.148	266.267	303.743	245.258	244.568	276.43
VIT_07s0005g02160	UBQ5 (ubiquitin 5)	270.59	288.923	231.638	207.628	238.563	185.959	207.81	206.93	185.869	283.943	290.979	240.702	224.997	231.241	219.359	234.741	204.379	227.852	279.759	370.553	235.539	205.714	211.619	214.56	239.79	206.597	208.082
VIT_07s0005g02600	Ribosomal protein L7Ae	5.55707	7.81172	6.62752	10.1741	8.40128	13.7126	20.8959	22.1952	27.5509	6.74346	6.94429	6.93938	9.39431	10.2822	12.1216	21.3753	22.6978	26.6474	6.08522	8.71345	5.91266	10.1678	9.88758	11.5181	18.3095	24.2983	22.9705
VIT_07s0005g04150	Ribosomal protein L23 (RPL23C) 60S	237.971	233.723	196.563	122.639	185.963	127.704	113.396	126.614	121.254	229.717	240.093	186.452	144.613	128	141.8	117.713	130.86	99.9988	242.297	317.551	196.09	128.459	170.216	129.399	112.689	118.161	138.398
VIT_07s0005g06490	Ribosomal protein L13A (RPL13aD) 60S	229.042	204.291	200.053	218.331	247.771	198.01	312.507	300.593	284.931	202.145	200.643	223.392	245.096	233.425	223.544	323.854	304.871	307.762	264.369	240.025	199.062	225.429	232.659	227.695	322.484	294.789	280.198
VIT_07s0031g01230	Ribosomal protein L30 (RPL30A) 60S	509.042	502.199	451.48	369.989	389.453	367.056	325.946	364.752	362.289	478.988	453.382	440.983	384.455	348.146	343.153	328.708	326.994	350.086	469.177	537.869	460.454	382.745	394.951	412.69	345.572	327.62	353.362
VIT_07s0031g02050	Ribosomal protein L3A	2.43815	2.02595	4.16316	2.54313	2.2704	3.62387	4.40351	4.69477	3.69383	3.14714	2.55208	4.52218	2.89221	2.79871	2.27092	4.35622	3.94966	2.78307	2.47667	2.41811	3.73228	2.1271	3.25046	2.98096	5.1193	3.7804	3.0908
VIT_07s0031g02150	Ribosomal protein L11	36.314	28.6646	36.2174	25.3537	34.011	19.835	32.5639	37.5191	33.3851	28.0196	30.9158	39.3604	25.1339	19.434	23.0708	29.3661	33.6569	27.7281	35.4931	45.7632	35.9293	22.1016	29.7426	18.9453	26.7334	34.2105	35.707
VIT_07s0129g00090	Ribosomal protein L26 (RPL26A) 60S	865.095	790.151	852.406	467.275	690.455	414.096	255.382	350.475	263.883	659.423	725.844	784.827	471.706	393.828	380.692	233.432	232.302	211.498	864.873	960.289	917.546	483.757	478.444	450.762	274.001	190.641	332.068
VIT_07s0129g00160	Ribosomal protein L26 (RPL26A) 60S	19.2803	15.3846	21.6896	5.50402	12.0163	6.8411	5.53485	7.12005	2.96729	12.1992	13.626	17.7107	9.65417	3.21714	5.276	4.99947	4.97639	1.37438	19.6228	18.9651	20.0435	4.04977	9.96575	6.56589	5.56012	3.90506	6.97875
VIT_07s0141g00200	Ribosomal protein L29 50S	9.49001	8.72614	9.41331	4.57696	5.03506	6.92259	1.63509	1.59443	2.25308	9.42572	7.15512	7.77629	6.04818	4.39342	6.19224	1.29924	2.18469	2.09964	8.14618	8.12499	9.91485	5.16751	4.70216	6.91646	1.94047	1.22285	2.87142
VIT_07s0141g00710	Ribosomal protein S15 (RPS15D) 40S	258.69	232.717	205.378	229.424	266.312	208.664	286.719	326.462	277.631	232.849	223.094	223.459	241.137	230.924	221.849	309.939	321.786	247.631	271.679	263.755	202.495	210.986	260.539	214.075	316.342	349.735	268.805
VIT_07s0151g00660	Ribosomal protein L24 (At5g23535) 50S	19.8067	17.3941	14.1139	14.7312	13.2106	13.8234	18.7136	15.9991	16.519	19.4725	17.283	15.4378	14.31	15.0603	14.4388	20.7709	15.8639	22.5156	18.8406	18.7042	14.1125	15.6458	10.7571	14.4465	19.9723	16.4737	16.1857
VIT_07s0151g00900	Ribosomal protein S24 (RPS24A) 40S	101.838	97.9254	78.0526	67.6317	62.7315	67.1809	119.466	108.807	103.414	95.399	101.465	99.1823	78.6929	74.3362	75.0932	120.13	112.381	116.851	107.888	109.297	76.0583	73.2552	63.7307	78.5056	122.241	124.814	96.1681
VIT_07s0185g00140	Ribosomal protein S21	13.3188	14.8245	10.9921	12.4899	13.9871	9.72192	15.9214	14.7718	13.5735	15.5343	13.7871	11.6541	12.6081	10.254	11.1796	16.0469	13.8556	13.7013	13.4147	12.8308	12.4556	10.3793	9.66412	10.2451	16.7134	15.068	13.5414
VIT_07s0197g00010	Ribosomal protein L25	14.9334	14.7971	11.1642	7.78518	8.27526	10.4949	6.40438	7.7029	9.73265	14.6033	15.9077	14.8691	7.85753	6.90762	8.03988	6.70943	8.05018	10.3849	17.1325	18.5507	11.5265	7.54524	9.32933	10.1385	6.0529	8.08	12.4
VIT_08s0007g01670	Ribosomal protein L35a (RPL35aC) 60S	141.246	128.189	111.832	109.015	114.895	109.728	135.86	132.853	136.139	135.078	125.034	121.15	112.996	110.736	106.444	136.209	132.794	138.232	148.337	153.47	118.72	114.457	115.555	120.213	137.467	141.871	117.721
VIT_08s0007g02620	Ribosomal protein S17 (RPS17A) 40S	26.1265	23.0575	21.3471	21.7642	33.2025	17.0365	26.2887	25.557	27.1614	21.0292	24.0423	33.8834	24.4729	27.3743	22.813	26.0309	26.4042	27.5131	29.019	23.5019	21.9149	25.3074	29.5875	21.2225	25.3665	25.5578	25.6282
VIT_08s0007g03020	Ribosomal protein S14 (RPS14C) 40S	120.694	120.517	71.8793	75.7249	79.9819	69.3914	85.2561	83.016	74.7782	122.87	115.879	89.4482	82.5704	79.3974	67.7337	84.6532	78.8773	76.4358	125.123	132.859	69.074	82.5861	74.6885	77.7264	92.2047	76.9989	75.0609
VIT_08s0007g03030	Small subunit ribosomal protein S27Ae	34.9677	33.539	30.0665	11.789	14.9568	11.3323	12.9064	17.7241	14.732	32.3629	30.2183	39.1452	16.4832	12.912	12.9351	16.5396	19.8061	12.373	47.3294	38.5569	27.5949	10.2513	16.3821	13.5817	15.6573	21.2802	20.151
VIT_08s0007g03340	Ribosomal protein L10A (RPL10aA) 60S	274.132	262.346	265.706	103.816	131.569	106.896	84.986	81.7135	64.7838	251.336	251.749	270.631	115.634	85.8642	97.1684	89.306	76.527	46.4052	266.915	315.472	273.24	93.6927	123.335	122.923	94.2726	71.563	74.6852
VIT_08s0007g03620	Ribosomal protein P2 (RPP2A) acidic 60S	418.666	392.065	394.821	155.404	177.73	151.074	143.127	168.32	138.344	401.843	373.929	388.173	160.944	119.692	144.525	149.044	148.148	103.624	403.47	469.792	419.071	147.035	153.493	189.557	150.673	144.141	156.239
VIT_08s0007g03850	Ribosomal protein L24 60S	66.4785	63.7943	48.8576	52.9225	48.0555	42.9946	56.0633	49.3175	45.148	69.7543	59.4282	61.449	55.3627	56.8969	47.5386	57.7341	52.9077	55.3604	69.5126	66.753	51.6983	52.6751	45.8306	50.4826	59.4767	53.5712	48.2631
VIT_08s0007g04210	Ribosomal protein L24 60S	359.886	383.92	317.569	321.374	326.952	297.458	340.881	371.25	339.593	354.95	364.989	331.79	349.386	337.382	317.653	352.216	339.49	345.494	383.821	468.606	313.722	312.96	326.613	331.128	379.719	353.082	357.473
VIT_08s0007g06150	Ribosomal protein L6 (RPL6A) 60S	343.951	375.659	286.322	205.805	197.337	176.11	226.085	208.647	210.433	329.856	356.265	302.742	202.707	214.962	174.497	231.417	195.829	252.449	356.313	394.524	300.642	217.569	191.688	203.667	231.868	200.818	207.837
VIT_08s0007g06890	Ribosomal protein L21 (RPL21A) 60S	520.38	513.835	535.312	281.564	284.814	282.854	191.362	241.305	266.998	478.629	496.414	553.201	270.655	276.996	253.165	195.03	206.75	317.498	494.498	651.289	562.45	313.188	254.375	295.969	202.663	219.079	285.123
VIT_08s0007g07010	Ribosomal protein L21 (RPL21A) 60S	193.168	178.922	146.41	182.079	188.071	167.545	254.658	224.56	209.54	183.363	166.472	166.992	192.933	208.156	186.579	267.069	231.131	235.524	207.591	199.223	148.243	186.762	181.487	180.517	269.868	240.003	201.872
VIT_08s0007g07210	Ribosomal protein S28 (RPS28C) 40S	490.722	437.076	499.478	122.374	143.125	139.166	103.733	110.381	100.38	400.505	406.808	495.662	140.905	107.902	124.226	111.325	93.3274	91.3298	459.083	560.369	535.618	120.018	139.327	168.852	113.653	93.0197	115.979
VIT_08s0007g07220	Ribosomal protein S5 (RPS5B) 40S	362.667	360.115	273.763	258.122	338.006	252.185	332.377	364.235	312.783	339.553	359.974	299.625	291.27	225.167	255.359	339.625	325.058	221.28	350.817	435.288	274.984	232.229	335.186	279.471	363.512	346.595	347.738
VIT_08s0007g08370	Ribosomal protein S2 (RPS2D) 40S	387.864	368.049	304.083	248.458	346.274	250.534	469.539	431.311	399.645	343.714	369.496	343.256	301.899	258.934	267.43	487.043	440.894	337.285	408.181	469.909	306.389	242.605	329.41	267.062	473.519	455.259	446.316
VIT_08s0032g00620	Ribosomal protein L22	20.7578	19.1416	17.041	26.2029	20.7447	22.6089	14.1874	20.5977	21.6569	21.7715	19.2428	18.2364	24.306	25.2457	23.0708	16.5243	19.0379	22.7612	19.4158	16.9224	17.5794	26.6958	21.5548	25.2288	15.021	17.9771	20.5539
VIT_08s0032g00900	UBQ5 (ubiquitin 5)	202.614	199.929	161.362	164.918	201.731	145.784	183.444	186.619	174.013	190.239	207.147	176.876	176.667	173.901	160.987	191.113	185.91	186.941	212.761	260.613	160.907	161.85	173.028	150.695	201.999	183.669	190.089
VIT_08s0040g02420	Ribosomal protein S23 (RPS23B) 40S	233.721	229.369	198.775	228.992	259.798	243.502	277.034	326.222	327.223	224.435	239.885	218.622	259.691	258.992	224.995	306.06	300.309	367.761	239.965	261.621	198.121	259.793	256.477	248.343	306.887	322.104	320.317
VIT_08s0040g02460	Ribosomal protein S15A (RPS15aF) 40S	471.806	438.442	437.299	268.432	256.704	288.139	216.291	264.041	259.496	398.784	393.048	424.243	261.753	211.8	250.73	214.648	218.752	202.183	440.031	423.249	460.861	254.714	254.467	340.48	224.851	245.753	281.107
VIT_08s0040g02630	Ribosomal protein L23A (RPL23aA) 60S	71.0714	74.9226	61.815	66.6379	61.0586	58.6279	53.057	61.2414	61.8715	80.6925	79.179	70.1701	71.9033	74.3748	62.7829	64.3952	58.6484	72.0847	73.9867	82.9615	64.8841	68.5389	59.7937	62.6644	55.5875	55.8356	58.6537
VIT_08s0040g03200	Ribosomal protein L4/L1 (RPL4A) 60S	181.254	181.046	155.045	151.533	181.926	122.19	149.336	154.125	142.112	159.15	180.415	179.411	156.758	153.567	142.443	147.495	154.773	148.803	189.599	211.378	153.338	144.785	156.325	135.899	141.504	145.333	158.454
VIT_08s0058g00390	Ribosomal protein S4 (RPS4D) 40S	296.764	308.348	267.8	189.462	196.494	191.266	176.467	169.504	157.641	299.596	314.839	287.036	211.196	226.031	191.733	186.273	167.337	193.76	291.777	357.254	269.553	205.81	194.239	222.395	199.409	160.623	166.171
VIT_08s0105g00280	Ribosomal protein S8e	23.9123	22.0443	17.8406	28.303	31.5098	24.4373	77.945	60.3316	56.8952	23.0278	22.306	22.2922	32.1244	33.6262	29.9925	80.6348	60.775	68.7958	25.8379	21.1099	18.5267	32.3991	29.1062	27.0724	80.4825	66.9351	51.2895
VIT_08s0217g00120	Ribosomal protein L41 60S	106.564	75.3045	85.2687	40.6636	61.7509	39.7502	62.5345	84.1429	58.3785	74.4114	71.6592	100.803	61.3186	28.75	45.4872	69.2798	77.6013	26.7954	113.642	116.035	88.2897	32.1003	65.0955	41.8158	81.1546	88.2184	78.572
VIT_09s0002g00610	Ribosomal protein SA (RPSaB) 40S	340.872	353.388	296.555	305.498	347.9	280.158	332.339	355.852	364.972	323.824	377.125	319.893	292.899	330.286	284.356	279.775	344.437	404.688	333.417	440.973	296.626	283.512	318.542	292.171	269.873	351.622	368.38
VIT_09s0002g00970	Ribosomal protein S29 (RPS29C) 40S	25.0465	23.6697	22.4545	9.52502	10.6933	12.2406	1.74847	2.37328	2.20141	23.1268	20.1946	20.2604	11.5712	8.62662	9.86253	1.68433	2.47451	1.73225	21.9929	20.9978	22.5505	11.3539	11.4095	13.2048	1.97801	1.14052	2.96899
VIT_09s0002g01460	Ribosomal protein S3 (RPS3A) 40S	409.692	399.275	400.33	203.341	229.402	207.767	229.964	239.048	214.195	358.204	370.441	408.112	211.028	202.289	204.954	227.237	219.026	228.541	391.972	467.389	415.512	213.246	198.835	219.188	247.91	217.404	220.071
VIT_09s0002g01620	Ribosomal protein L9 (RPL90A/C) 60S	367.077	371.064	296.988	285.985	347.916	286.1	321.311	327.661	277.64	346.867	354.221	324.697	320.115	279.657	288.573	339.631	306.485	256.918	389.197	423.941	304.841	266.091	322.278	314.577	334.739	296.628	306.529
VIT_09s0002g01660	Ribosomal protein L34	24.7593	24.8763	18.1897	26.4984	25.5081	22.8085	32.6159	31.71	34.3075	23.6117	24.029	20.9865	24.9902	23.0504	22.4136	35.8111	32.2269	36.7689	23.5069	31.6509	18.0617	25.0959	23.432	22.6459	32.0902	29.9532	29.7198
VIT_09s0002g02520	Ribosomal protein S15A (RPS15aE) 40S	17.5595	14.8474	12.2447	10.3788	10.1669	9.21679	9.17008	11.3866	10.3903	18.4508	13.1422	13.5206	11.7096	9.53104	9.83678	8.54854	9.50146	10.5541	17.9023	12.7737	11.8606	10.3748	9.93245	11.132	7.98031	9.29245	12.8324
VIT_09s0002g02560	Ribosomal protein L28e	365.715	410.501	309.456	273.427	279.12	242.492	280.576	305.929	307.879	381.686	411.871	343.808	289.688	309.467	251.112	277.949	265.421	363.352	378.82	481.284	314.908	311.391	256.052	286.383	317.416	276.06	299.416
VIT_09s0002g02640	Ribosomal protein S30 (RPS30C) 40S	165.918	152.065	138.908	75.3457	84.6652	65.3657	32.7254	46.3949	47.4679	161.3	142.66	142.652	82.3621	71.0165	75.1354	39.6582	47.3138	52.5392	171.77	160.682	132.743	74.3205	74.7957	76.3886	40.6531	45.963	59.9549
VIT_09s0002g04330	Ribosomal protein S17 30S	79.3074	72.7916	93.8401	30.769	24.5658	42.1523	9.57199	11.3018	17.2998	79.7756	57.568	70.1471	31.1598	27.9218	40.5754	9.61614	11.4116	19.6067	72.2991	80.3921	85.7767	30.7611	22.7285	43.0062	7.88127	8.7966	21.2306
VIT_09s0002g04440	Ribosomal protein L37 (RPL37C) 60S	246.284	249.173	193.072	144.826	148.393	137.386	108.575	102.52	98.7442	258.691	253.893	206.179	148.257	145.93	141.011	122.49	105.278	110.565	242.332	260.461	202.055	148.176	147.366	175.564	119.51	96.5249	110.781
VIT_09s0054g00010	Ribosomal protein L7 (RPL7D) 60S	56.2012	59.0951	39.231	44.5829	41.1584	38.3594	43.4601	45.5172	42.4188	52.8103	53.9806	45.7901	45.1099	51.6468	42.2603	43.7983	45.0547	55.3777	53.7704	60.3366	39.0661	47.2041	35.8684	42.2774	47.4749	45.2719	40.6574
VIT_09s0054g00090	Ribosomal protein L7 60S	8.99071	10.7107	6.58325	10.3878	7.96489	7.05502	10.7533	11.4123	11.2886	9.89222	9.37751	7.80436	8.52867	13.2517	8.5391	12.0491	12.6505	14.8824	10.338	8.73215	7.07507	10.8959	6.58789	7.18148	12.5096	13.428	9.79346
VIT_09s0054g00210	Ribosomal protein L7 (RPL7D) 60S	0.374069	0.240133	0.186125	0.353321	0.0813417	0.260987	0.517156	1.07577	0.832871	0.293465	0.345742	0.508357	0.463574	0.414978	0.166559	0.74042	1.01311	1.23195	0.291407	0.456138	0.236303	0.268902	0.479849	0.423481	1.13879	1.04405	0.644441
VIT_09s0070g00050	Ribosomal protein S12 (RPS12C) 40S	106.291	99.4252	62.7329	45.8914	61.2297	44.5864	71.5842	75.3018	71.3622	95.8329	96.7854	81.5327	54.0971	47.716	43.771	70.2835	77.0195	62.2325	121.675	118.219	65.0341	46.6625	55.2728	50.976	75.1143	80.7929	71.1994
VIT_09s0070g00100	Ribosomal protein S17	13.3188	12.0939	11.3514	7.86498	6.43328	8.20308	9.69471	9.31488	10.7951	13.4591	10.3927	10.4378	7.38585	5.94932	9.54634	9.70683	9.41569	10.1573	13.6609	12.1633	11.6295	6.97398	7.53327	7.3649	7.94189	10.3961	10.1799
VIT_09s0070g00130	Ribosomal protein L7 (RPL7A) 60S	54.5946	50.4411	49.824	77.5537	50.351	66.1477	97.0269	77.4677	87.5205	55.2208	42.0025	52.9922	68.4806	84.0096	78.2694	106.163	84.5978	120.561	56.0979	37.8481	51.3156	83.0875	53.3511	69.6143	105.005	89.3063	68.9365
VIT_09s0070g00270	Ribosomal protein S17	12.2035	12.1626	13.7209	6.30758	8.09875	6.22349	7.69357	5.21244	4.36607	11.8179	9.67616	13.2815	11.1342	5.4793	6.67873	6.14865	4.92812	3.8712	14.1958	13.537	12.0811	5.06508	9.23589	7.6492	5.73171	3.54769	4.51185
VIT_09s0070g00890	Ribosomal protein S7 30S	0.637569	0.964867	0.349971	1.20366	0.427649	0.79496	0.609661	0.87937	0.993032	0.678465	0.315717	0.984403	0.901956	1.61269	0.539592	0.559889	0.989809	1.32148	0.864376	0.766495	0.159416	1.04171	1.02742	1.85334	0.540746	1.07259	0.69054
VIT_09s0070g00920	Ribosomal protein S12 30S	0.624908	0.688204	0.845116	1.56299	0.333395	0.866981	0.372585	0.718463	0.79531	0.799562	0.569305	0.515917	0.64485	0.686016	0.446623	0.43238	0.40206	0.640609	0.566052	0.491134	0.636917	0.711092	1.33172	2.19294	0.509197	0.444079	0.753392
VIT_10s0003g00010	Ribosomal protein S5	53.6318	46.9642	66.5349	41.1163	32.0415	46.3932	40.1939	34.4108	39.5196	53.4797	37.2625	60.6627	46.5572	39.7368	44.5703	35.597	35.4886	50.8541	57.3584	45.5249	70.335	44.1892	33.2036	45.8073	38.8448	29.645	40.3599
VIT_10s0003g00080	Ribosomal protein L11 methyltransferase	25.2584	23.3228	25.2427	13.452	14.4282	17.3745	10.8529	18.5295	20.6106	20.9245	24.9327	29.7092	13.0765	16.4769	15.5439	10.4154	17.6838	24.0814	24.5877	34.1174	27.6535	14.4106	14.8832	16.9453	10.9541	20.2208	21.9632
VIT_10s0003g01080	Ribosomal protein L34	49.6876	49.6702	49.3499	30.5113	29.2819	41.5498	22.1392	21.9992	26.1824	53.5909	42.4295	43.7438	37.6858	27.2785	40.9689	23.3796	26.2835	23.9233	53.5859	57.6003	51.5213	28.8246	32.4131	42.167	18.3476	20.3883	31.3933
VIT_10s0003g01520	Ribosomal protein L11 (RPL11D) 60S	547.5	515.542	518.057	421.654	472.506	432.612	345.485	346.6	276.889	457.729	477.098	542.153	458.798	374.909	391.167	342.609	297.388	246.272	508.471	584.579	524.056	408.681	462.945	474.389	345.497	288.385	289.945
VIT_10s0003g02650	Ribosomal protein L32 (RPL32A) 60S	494.428	494.933	415.093	383.797	365.211	376.623	393.754	413.07	360.605	479.183	456.932	426.542	382.168	393.695	348.525	411.575	368.265	405.043	478.442	515.181	424.651	393.182	368.209	429.983	431.292	385.577	361.826
VIT_10s0003g03130	Ribosomal protein L18A (RPL18aB) 60S	140.383	138.059	123.097	131.396	119.311	117.138	134.322	116.377	105.023	125.162	125.659	126.813	133.382	137.544	128.437	140.125	112.644	125.309	129.21	157.841	124.497	139.84	119.204	134.943	132.703	110.124	101.453
VIT_10s0003g03150	Ribosomal protein L18A (RPL18aB) 60S	299.868	317.005	233.044	237.476	257.713	219.418	176.882	191.32	181.029	308.867	318.833	262.371	243.58	256.469	201.382	196.587	171.619	206.741	313.424	382.63	247.256	263.302	236.811	265.352	190.188	174.029	190.596
VIT_10s0003g03160	Ribosomal protein L18A 60S	71.9993	65.4248	82.193	144.249	134.145	126.274	120.852	108.487	96.2312	65.3696	59.0391	75.4923	130.768	118.326	120.749	125.587	91.3375	86.8979	64.4565	66.8221	78.8244	134.317	131.091	125.031	117.867	90.6551	92.4249
VIT_10s0003g03920	Ribosomal protein L14	23.9901	23.5025	19.3475	22.111	19.3841	21.0632	24.4979	20.7199	21.9914	26.3115	23.0179	18.3289	22.7667	24.7189	23.1333	26.1817	23.1922	24.9941	24.4315	26.3424	19.461	20.1007	20.6327	22.8166	23.5653	22.4303	21.9804
VIT_10s0092g00050	Ribosomal protein L17	46.3983	40.3403	53.313	59.6517	52.2168	63.3493	57.1999	46.5855	49.9396	52.7951	34.1884	44.3739	56.5021	54.7327	64.6644	51.9494	41.9508	53.9603	48.6789	38.858	53.9365	61.9095	45.2232	64.048	59.7829	40.272	50.9088
VIT_10s0092g00790	Ribosomal protein S19	0.556222	0.162352	0.486213	5.66472	2.84682	4.58644	6.92679	8.39692	12.0703	0.579794	0.59041	0.664675	2.21618	3.80017	1.58393	2.3603	5.05444	16.1825	0.746841	0.358551	0.240713	3.5511	3.26045	8.41708	4.63336	4.71293	4.37422
VIT_10s0116g00180	Ribosomal protein L4/L1	17.6582	16.5577	14.2807	11.1084	11.9645	10.5007	16.098	15.262	15.2887	16.6043	14.4369	16.9324	12.5922	9.54921	9.93103	15.2392	13.9679	14.1012	19.1295	16.8669	14.178	11.4811	12.0356	11.685	14.9756	14.0954	15.0004
VIT_11s0016g00840	Ribosomal protein S29 (RPS29C) 40S	198.861	231.447	120.259	155.136	194.7	135.385	150.79	165.062	134.853	210.61	226.421	151.572	175.803	163.226	134.562	167.508	160.159	136.616	211.044	283.303	132.059	150.772	175.673	177.043	148.809	155.082	179.654
VIT_11s0016g01380	Ribosomal protein S3 (RPS3C) 40S	100.223	102.405	80.8988	70.0608	78.8001	66.2381	87.3486	86.2093	82.0954	95.7058	90.6472	96.4524	74.6329	82.7022	56.4504	86.274	81.3488	92.2814	104.596	107.498	83.2843	78.5591	67.502	78.5619	82.9821	83.448	70.0108
VIT_11s0016g02040	Ribosomal protein S16	7.05158	4.37644	7.60995	17.3523	13.4425	11.7232	18.5035	12.298	13.7539	7.54626	3.55256	6.59344	17.1427	13.6898	14.8244	19.9269	13.6355	17.5443	7.59059	3.64919	8.25374	15.4875	11.9464	14.1355	16.8309	12.8327	12.6629
VIT_11s0016g02650	Ribosomal protein L31 (RPL31C) 60S	256.028	247.333	137.743	148.558	145.22	135.572	131.226	151.575	157.004	260.779	232.436	179.668	164.317	171.196	140.142	145.969	148.899	169.518	256.239	295.815	151.881	149.334	146.366	155.76	147.326	149.49	163.027
VIT_11s0016g02690	Ribosomal protein S30 (RPS30C) 40S	892.704	1025.17	775.666	916.069	666.598	757.854	725.747	749.194	846.879	957.752	920.576	770.465	733.692	1006.21	680.19	741.395	681.521	1317	826.907	1076.52	804.657	984.037	559.978	799.211	734.078	701.065	620.059
VIT_11s0016g05390	Ribosomal protein L36	41.5727	40.9761	42.4796	67.481	62.0738	56.9685	82.6886	78.1849	72.365	42.9995	38.8683	41.702	63.8314	58.6402	60.1698	93.7273	75.6629	70.8089	41.0284	43.968	44.166	66.0311	60.3239	60.8213	91.0715	72.2132	64.5323
VIT_11s0037g00080	Ribosomal protein S12 (RPS12C) 40S	360.178	363.698	316.299	346.212	344.833	340.86	299.055	348.244	342.278	344.443	315.287	306.289	339.519	323.356	275.979	326.155	307.133	329.567	334.9	405.05	303.144	356.163	321.11	390.863	326.056	327.088	343.813
VIT_11s0052g00290	Ribosomal protein L7 (RPL7D) 60S	470.429	503.747	437.293	337.287	313.097	340.284	182.995	209.055	207.493	493.898	475.433	467.261	340.232	348.621	321.68	203.604	198.569	246.756	489.142	545.544	474.767	378.141	300.399	394.051	210.075	193.949	226.882
VIT_11s0103g00220	Ribosomal protein P3 (RPP3B) acidic 60S	444.423	429.159	393.639	247.307	326.77	247.996	198.729	191.17	161.629	407.242	389.004	376.563	277.618	239.886	233.287	205.254	186.917	164.032	415.827	543.982	408.474	257.52	289.435	285.659	200.263	168.668	195.918
VIT_11s0118g00670	Ribosomal protein L14 (RPL14B) 60S	230.949	246.875	181.792	171.902	168.332	164.535	104.342	117.861	95.9775	241.242	232.943	210.374	185.511	191.968	154.342	122.898	108.595	131.453	235.689	260.398	190.8	189.893	165.659	189.593	118.588	98.5479	109.559
VIT_11s0118g00680	Ribosomal protein S11 (RPS11A) 40S	77.9	76.8949	43.0226	55.0318	63.8119	49.5697	53.5489	74.934	81.4734	84.5023	79.5109	55.375	55.4489	54.9014	52.2703	58.3205	71.2411	79.0541	78.1165	83.3434	43.0313	51.1728	53.9516	64.3297	54.6507	74.9732	89.089
VIT_11s0149g00070	Ribosomal protein S6	38.0053	40.3389	26.0894	39.456	33.6792	36.0781	44.6094	48.533	50.7144	41.6406	38.9653	27.3071	37.3714	43.1118	39.4999	42.1924	43.1927	61.8767	36.6007	37.0082	27.8462	40.5821	33.8554	34.1121	43.7805	45.2633	46.3228
VIT_11s0149g00220	Ribosomal protein L39 (RPL39C) 60S	187.112	182.829	141.408	132.964	147.752	132.725	211.878	226.043	178.819	203.504	183.169	153.322	143.391	100.559	138.258	225.425	201.453	122.569	177.948	189.957	154.945	110.636	143.703	167.658	213.765	216.355	200.381
VIT_11s0149g00240	Ribosomal protein L39 (RPL39C) 60S	139.673	164.126	123.249	138.887	156.475	129.925	173.499	195.661	178.577	161.331	174.664	133.092	147.485	148.102	144.961	190.864	185.084	171.434	150.44	169.563	123.504	141.149	137.909	151.101	200.429	192.452	172.546
VIT_12s0028g00970	Ribosomal protein S7	0.407857	0.372337	0.305673	1.59037	0.629545	0.824936	0.247044	0.445048	1.76046	0.276899	0.318177	0.530944	0.514892	0.788645	0.405881	0.290578	0.594711	1.55956	0.515229	0.547712	0.371227	0.917581	1.17622	1.77016	0.401944	0.355077	0.743046
VIT_12s0028g01800	Ribosomal protein L11 (RPL11D) 60S	144.856	138.492	80.1724	52.4744	70.1156	45.1585	64.1437	74.3839	70.1544	141.844	128.652	103.23	68.6423	50.8881	40.6423	65.9895	69.1961	57.3971	155.003	170.325	86.8125	53.7344	65.4303	52.8877	65.1373	67.3492	77.9106
VIT_12s0028g01980	Ribosomal protein L1	16.1318	16.5481	11.327	10.5903	10.0598	11.3862	12.3293	14.1769	16.8609	15.7343	17.6781	14.9089	11.0956	13.0554	12.4314	14.4566	14.4292	18.6131	16.6317	19.1631	10.9965	12.3606	11.4002	13.0301	13.1407	14.799	16.2891
VIT_12s0028g02100	Ribosomal protein S5, bacterial and organelle form	20.0354	17.6648	22.3085	22.6978	21.1563	21.9585	34.9068	31.6777	29.6016	19.6382	17.9568	23.2251	23.8509	22.083	22.9793	38.2346	34.693	35.6041	19.288	18.3516	21.6432	21.639	19.116	22.126	36.2317	32.5197	28.3417
VIT_12s0034g01000	Ribosomal protein P0 acidic	58.7173	59.38	39.0586	33.8704	36.395	28.5214	71.2501	61.6906	60.2197	57.1827	61.4675	56.7959	36.5679	34.3973	30.0758	68.6557	58.1766	55.4976	62.4877	65.8005	43.3774	37.2935	33.1168	34.0276	71.565	68.6479	55.7928
VIT_12s0034g01020	Ribosomal protein L18	3.4081	2.88293	2.48644	1.68277	1.69023	1.50226	1.94876	1.70758	2.28446	4.03674	2.46359	3.57621	1.60995	0.972978	0.676738	1.30908	1.22591	1.72967	2.54273	1.97793	2.95489	1.07741	1.63059	1.23699	1.71617	1.19907	1.79166
VIT_12s0035g01020	Ribosomal protein L3B	118.701	112.293	57.1562	82.5225	88.5882	87.823	117.132	97.9101	92.1224	114.639	122.718	88.0161	88.538	104.432	70.8446	124.657	96.9748	106.647	120.795	131.748	59.5798	97.3617	86.8196	94.1304	130.273	100.002	92.3096
VIT_12s0035g02010	Ribosomal RNA 23S	0.61631	0.384553	0.738798	0.267779	0.645054	0.553633	0.748955	0.455126	0.639836	0.962827	0.904041	0.558056	0.623384	0.439997	0.858132	0.828956	1.09721	0.820976	0.92338	1.02518	0.788363	0.225827	0.619635	0.53805	0.581371	0.425605	0.690078
VIT_12s0059g01230	Ribosomal protein L30	16.3768	14.9653	14.6996	14.3132	15.5267	15.0583	15.0716	14.144	12.2546	17.2351	12.2572	17.244	15.6563	13.2334	12.8291	15.9505	12.4731	10.3231	16.043	14.413	16.4486	13.4076	15.4755	14.8275	15.6283	13.3057	11.9058
VIT_12s0059g02250	Ribosomal protein L6	28.1333	25.0476	24.6041	9.49584	9.6166	14.6122	4.83467	6.70717	6.21753	29.0622	17.9325	22.0771	10.3102	8.34823	10.7905	5.3316	5.90421	5.07832	25.038	21.5574	28.8716	10.3034	8.87261	15.0187	5.80629	5.40843	7.81629
VIT_12s0121g00010	Ribosomal protein L29 50S	13.9617	14.384	15.2705	10.3076	8.75158	12.3931	4.93612	5.39682	5.18703	14.971	11.3245	12.7499	10.1298	8.22294	8.78618	5.39914	4.48903	6.17339	13.4004	15.2768	15.3748	11.9151	8.71586	12.7213	5.28265	4.04169	5.71105
VIT_12s0134g00060	Ribosomal protein L2	153.449	148.597	105.404	139.842	213.087	133.81	240.703	213.536	193.975	140.338	161.699	126.016	169.86	141.703	154.869	245.153	213.381	155.975	171.196	201.167	105.771	135.338	194.899	149.591	247.389	202.365	219.336
VIT_12s0142g00200	Ribosomal protein L1 60S	37.9305	39.0787	28.1398	24.6711	20.0061	17.1332	39.1389	25.7161	27.14	38.0291	39.9976	39.3765	26.6346	28.1462	18.8551	39.265	27.7823	36.8249	38.5876	46.1868	28.7421	27.2075	18.2851	21.526	40.6731	31.9639	25.5333
VIT_13s0019g00250	Ribosomal protein L23A (RPL23aA) 60S	568.818	600.599	515.708	360.29	352.295	323.86	319.375	340.535	315.722	566.608	605.455	548.873	370.667	383.468	318.253	335.872	314.628	381.764	567.465	658.191	511.047	395.077	330.915	384.79	335.631	329.534	287.015
VIT_13s0019g00530	Ribosomal protein S15A (RPS15aF) 40S	348.758	328.764	274.209	195.728	221.027	208.399	283.537	289.745	269.791	314.414	297.871	291.678	215.432	198.625	189.762	292.604	259.13	219.07	352.226	338.936	286.61	199.094	226.663	232.001	313.726	307.225	258.063
VIT_13s0019g02240	Ribosomal protein S7 (RPS7B) 40S	29.4494	29.2143	30.1403	23.6742	27.0708	29.3374	29.5778	34.4584	30.3185	29.4489	29.2448	33.7049	30.4963	24.063	26.691	32.3762	30.629	25.8023	32.7821	30.9792	28.4548	22.5158	28.8979	28.583	30.9492	29.5014	28.0408
VIT_13s0019g03260	Ribosomal protein L35a (RPL35aC) 60S	227.796	237.844	173.546	190.174	197.215	195.587	212.888	204.107	210.455	236.427	233.1	218.965	212.001	233.716	185.182	220.37	201.019	246.407	254.3	274.344	179.562	210.596	185.854	229.645	220.034	202.069	185.222
VIT_13s0019g03640	Ribosomal protein S23 (RPS23B) 40S	140.481	119.91	101.918	71.7027	112.929	83.3525	108.144	123.427	106.449	122.392	114.864	117.044	96.6082	57.3503	79.316	109.885	120.563	55.9899	146.655	157.291	107.081	64.2196	116.926	84.0034	112.407	128.795	132.337
VIT_13s0019g03970	Ribosomal protein P0 (RPP0A) acidic 60S	155.379	146.884	136.79	145.234	188.85	142.893	328.256	250.513	219.211	156.792	165.943	153.497	168.225	134.508	157.434	328.178	256.178	167.747	165.539	174.968	139.018	125.333	187.814	148.313	323.284	262.66	226.563
VIT_13s0019g04930	Ribosomal protein L15	19.1571	18.1911	20.4714	19.4417	15.6148	18.7837	17.3281	13.8963	12.6421	18.9459	16.035	20.8083	20.6421	18.3683	21.6257	19.7562	14.7392	15.5743	18.8013	17.8714	20.2895	19.6274	16.9347	22.2875	17.3429	11.1945	12.2736
VIT_13s0047g01160	Ribosomal protein L13 (RPL13D) 60S	341.698	355.693	285.167	263.72	291.466	257.3	256.777	287.847	268.917	349.03	363.352	309.75	279.285	274.296	241.271	268.476	256.055	265.716	342.069	442.635	284.591	282.139	288.999	271.303	279.61	275.77	273.396
VIT_13s0064g00170	Ribosomal protein L1	52.623	62.6613	63.2533	62.5939	58.3211	70.2185	100.284	78.2019	78.034	63.5628	59.0269	60.9813	69.1041	72.0844	57.6542	92.1039	81.0494	78.4271	50.6129	67.2959	65.5558	74.2098	60.1276	65.9105	97.9474	84.1581	70.9375
VIT_13s0064g00850	Ribosomal protein L30 (RPL30B) 60S	54.1398	52.1157	37.2407	34.0541	41.7076	33.1614	44.8833	51.6301	55.683	55.2	55.0027	50.6552	39.2347	31.4298	31.9504	49.198	48.3679	50.3232	61.7129	59.6737	39.3566	34.8574	39.8837	39.5994	48.3292	50.5321	64.1466
VIT_13s0064g00880	Ribosomal protein L36a/L44 (RPL36aB) 60S	415.943	455.344	319.702	335.111	344.863	290.315	291.119	415.699	384.638	439.513	466.717	377.291	321.879	326.026	300.331	317.407	357.912	411.008	406.345	538.515	332.335	331.648	322.318	373.536	338.763	376.915	415.74
VIT_13s0064g01240	Ribosomal protein L31 (RPL31C) 60S	913.18	884.792	897.018	383.013	486.419	380.161	166.571	220.867	171.715	766.849	784.577	867.806	413.187	317.518	342.674	167.473	179.079	163.523	948.864	1090.37	977.885	402.232	409.606	451.266	187.865	161.956	214.826
VIT_13s0064g01390	Ribosomal protein L6 (RPL6C) 60S	225.332	233.775	167.321	154.007	158.854	142.315	154.699	159.125	157.409	221.427	223.774	194.605	160.201	159.702	156.959	158.612	161.746	163.09	235.294	240.243	173.248	147.411	155.222	160.767	158.28	163.174	165.926
VIT_13s0067g00270	Ribosomal protein P0 (RPP0A) acidic 60S	178.866	170.289	158.366	122.232	168.895	123.743	123.259	117.042	87.8313	170.458	183.551	179.736	155.837	119.524	122.692	130.4	106.951	68.6363	187.629	196.973	170.083	126.173	160.172	133.413	139.316	92.8778	107.649
VIT_13s0067g01820	Ribosomal protein S4 (RPS4D) 40S	35.0206	37.3362	19.267	30.1767	25.935	24.7308	52.2661	43.006	43.2246	38.1475	36.7012	22.1876	29.1846	30.8043	23.5212	57.9719	42.9563	55.9851	36.7225	42.5258	18.4775	30.442	24.3416	29.8266	57.3743	44.8434	39.204
VIT_13s0067g02700	Ribosomal protein S26 (RPS26C) 40S	341.847	340.797	303.122	210.063	233.955	190.294	209.373	221.584	206.196	331.273	339.383	308.676	222.231	215.132	193.903	205.958	206.925	196.638	336.855	398.5	314.006	219.586	212.984	230.49	212.857	215.285	213.358
VIT_13s0067g03290	Ribosomal protein L10	36.2305	26.1952	38.3329	13.1622	13.1418	17.3614	12.9869	18.4012	24.1159	34.3414	22.0699	30.0743	14.3841	10.7166	16.2508	10.7771	17.3824	20.037	39.0317	25.8311	37.8184	12.0656	13.5674	14.3314	13.6802	18.6403	24.1345
VIT_13s0067g03350	Ribosomal protein L4/L1 (RPL4A) 60S	1.81832	1.76508	2.00036	4.72701	5.45233	4.42953	16.36	14.2018	17.1177	1.54086	2.43871	2.56022	5.12534	6.34675	6.52075	17.6689	16.6465	16.1183	2.45312	2.7888	2.14177	3.38496	5.21825	4.00569	16.5307	17.3852	13.3697
VIT_13s0073g00120	Ribosomal protein S17 (RPS17A) 40S	579.559	572.785	582.148	389.968	454.436	371.577	275.04	306.626	275.045	554.809	580.617	598.039	402.501	375.465	369.815	278.639	256.336	271.207	593.107	688.437	605.297	390.615	412.009	408.355	292.261	255.844	308.651
VIT_13s0074g00140	Ribosomal protein L24 60S	106.944	122.712	90.318	87.6606	78.1163	79.6134	73.2532	80.1895	86.4153	121.693	117.243	95.295	86.5297	91.1574	81.9448	76.4044	80.5842	101.945	120.955	130.554	94.5025	95.4942	77.7433	96.1644	78.6421	80.0031	94.5352
VIT_13s0074g00750	Ribosomal protein P2 (RPP2B) acidic 60S	22.6157	22.518	20.4794	14.266	16.2067	18.4398	19.9388	16.1939	17.3329	24.9882	20.2559	21.9375	16.3107	14.0837	18.0024	20.348	18.6287	15.4373	25.6293	27.1062	22.6278	12.9602	18.7552	18.9867	19.5379	19.8719	17.6116
VIT_13s0101g00220	Ribosomal RNA 16S	118.424	240.198	69.2712	1742.12	781.535	1135.08	332.052	424.237	1184.03	93.367	152.712	68.8719	460.127	598.274	189.78	177.892	312.906	790.619	70.2429	168.775	70.6593	532.581	1535.32	2214.75	545.113	382.936	349.272
VIT_13s0101g00470	Ribosomal protein S25 (RPS25E) 40S	48.0437	37.6379	45.3348	39.146	48.0745	43.565	40.8913	38.5649	27.2375	41.9621	34.2818	46.1224	42.4813	32.4069	41.8719	43.5049	34.6745	22.2159	45.7614	40.798	45.2301	33.958	48.1723	48.3091	42.287	31.5602	31.8793
VIT_13s0147g00060	Ribosomal protein S25 (RPS25E) 40S	233.791	239.197	173.334	218.285	189.78	167.269	287.643	280.467	276.133	239.538	230.813	197.862	196.168	206.966	190.39	296.996	267.097	342.918	229.348	241.697	176.498	215.782	174.205	187.785	309.303	290.486	250.929
VIT_14s0006g00820	Ribosomal protein L13 (RPL13D) 60S	185.005	180.564	135.06	125.801	131.481	124.586	107.929	127.89	119.632	175.777	185.7	157.742	135.727	129.094	116.268	109.05	115.224	123.248	200.518	214.991	144.846	134.828	133.51	135.668	122.391	121.367	132.482
VIT_14s0006g02470	Ribosomal protein L26 (RPL26A) 60S	124.749	115.768	123.601	112.47	134.742	95.9402	90.0636	102.068	98.2137	119.043	124.846	134.67	114.024	95.2773	122.872	91.7366	104.779	86.0955	127.206	144.336	121.568	95.275	114.451	105.645	88.2741	91.4044	125.545
VIT_14s0006g02830	Ribosomal protein S7 (RPS7A) 40S	288.755	294.704	265.169	126.93	128.86	132.417	90.6481	99.1383	84.1561	247.702	268.809	268.618	125.638	117.36	116.295	86.4816	82.4725	81.6102	271.762	306.674	275.777	137.225	116.406	160.37	89.4464	77.6772	88.461
VIT_14s0006g03060	Ribosomal protein S3, Chloroplast 30S	49.5964	53.797	50.4899	22.7597	23.9824	26.4651	15.0937	16.0776	17.053	47.689	43.2351	42.3179	25.6001	18.7701	25.4333	16.6235	15.2064	14.2923	54.2049	61.6825	52.3836	18.4299	23.3539	28.3909	15.8013	14.7121	19.5724
VIT_14s0030g00630	Ribosomal protein L18 50S	18.3476	21.5106	21.2742	21.7179	18.4997	21.2076	25.8685	26.7905	29.017	19.112	19.1987	19.5815	18.1421	19.1589	20.9935	27.3443	26.4367	35.3736	17.6446	24.239	23.5099	22.1405	18.3095	23.5147	25.6426	26.1516	25.5112
VIT_14s0030g00680	Ribosomal protein S4 [Vitis vinifera]	0.0631162	0.0455729	0.0924571	0.447831	0.188148	0.263031	0.092368	0.218145	0.480273	0.0223981	0.0560646	0.0380809	0.177496	0.264855	0.108	0.102504	0.106109	0.609612	0.0840145	0.0190538	0.124205	0.31098	0.469101	0.707612	0.263752	0.220597	0.257648
VIT_14s0030g01620	Ribosomal protein S24 (RPS24A) 40S	633.473	618.16	607.316	320.913	356.193	322.542	304.155	327.565	274.574	587.115	566.164	609.898	355.254	296.762	292.587	325.952	279.533	227.859	611.715	710.035	651.345	307.311	347.332	346.377	345.953	292.055	274.848
VIT_14s0030g01810	Ribosomal protein S3A (RPS3aB) 40S	600.606	589.197	562.045	364.825	432.208	369.257	465.674	474.472	449.867	576.399	607.71	598.642	409.326	362.164	359.73	482.918	448.735	400.05	611.626	716.236	587.098	361.113	401.774	407.028	492.839	475.281	467.045
VIT_14s0060g00010	Ribosomal protein L21	2.08291	2.5309	2.12144	2.66726	2.12592	3.38215	4.09685	1.94294	2.95904	2.0578	2.10928	2.51073	2.68246	3.29127	3.13581	3.2944	2.04836	3.48846	2.42725	1.59945	1.87801	2.68726	2.43648	2.82338	3.07432	2.23479	2.25857
VIT_14s0060g01710	Ribosomal protein L18	13.6494	11.6728	14.0559	22.2514	17.7415	21.2064	14.0961	14.215	17.1614	16.3567	10.9088	15.7364	22.0382	20.8685	20.5701	13.1204	14.5259	21.8547	15.1499	11.156	15.4903	23.5521	18.2827	19.7736	12.8086	12.2956	14.7699
VIT_14s0060g01930	Ribosomal protein L18 60S	217.502	225.42	198.478	118.954	143.967	130.581	149.221	150.01	138.178	219.9	218.895	212.74	142.672	128.851	124.882	164.805	145.664	134.422	242.59	301.904	200.954	126.213	142.893	156.548	168.869	137.257	148.086
VIT_14s0060g02050	Ribosomal protein L22-2 (RPL22B) 60S	32.6183	29.2986	24.6713	19.1587	27.3372	21.7729	15.9182	16.8613	18.5379	32.1648	30.6843	28.4791	23.881	17.4237	22.9307	13.9308	18.3749	13.9853	33.2735	32.8651	24.7536	20.4048	25.3595	20.9399	15.2006	15.7736	22.1314
VIT_14s0060g02110	Ribosomal protein S21 (RPS21C) 40S	530.062	490.036	493.763	398.708	435.478	379.352	385.548	439.667	383.526	482.144	465.628	503.995	407.105	320.278	377.678	413.104	384.219	315.947	516.436	538.276	525.758	344.611	432.862	426.426	426.65	412.46	407.865
VIT_14s0060g02310	Ribosomal protein L22-2 (RPL22B) 60S	138.397	122.168	94.1672	120.132	136.703	113.909	178.5	166.322	154.051	130.961	123.157	108.388	138.072	120.511	129.959	195.938	179.255	136.013	143.239	158.218	96.3769	118.392	144.578	127.88	180.769	180.335	161.958
VIT_14s0066g00560	Ribosomal protein L27A (RPL27aC) 60S	534.815	534.347	667.527	124.066	185.755	137.031	66.3691	81.9419	68.985	436.38	472.478	620.773	131.579	100.28	116.983	60.1633	66.9337	62.4214	491.714	610.347	697.698	125.33	134.98	137.38	64.063	56.7618	94.2633
VIT_14s0066g01110	Ribosomal protein L12-1, chloroplast (CL12-A) 50S	97.3505	88.6996	116.756	60.1039	52.9995	78.0852	54.7972	47.6262	61.489	102.207	81.7392	94.0456	64.5743	51.1721	73.1375	49.0578	46.9016	58.4624	100.074	94.4833	113.774	63.3893	52.182	71.5604	55.1407	44.3258	59.2167
VIT_14s0068g00880	Ribosomal protein S27	55.058	57.1187	42.3103	33.1167	37.0328	32.7066	28.9821	34.9339	33.4404	60.2888	62.4441	47.651	38.8184	35.7097	32.6631	31.9179	32.8632	36.9763	56.1247	69.3122	45.0039	35.5446	39.0503	39.1223	30.322	32.9705	37.1949
VIT_14s0068g01640	Ribosomal protein L7A	85.0318	88.7207	71.5907	86.6885	93.2016	82.9148	118.198	97.949	92.2475	84.3689	87.8347	77.272	96.0057	93.9016	88.4723	125.15	99.8256	94.6023	92.0049	99.6352	69.1796	90.2685	92.3993	100.144	124.264	104.063	89.9184
VIT_14s0068g01950	Ribosomal protein L27, chloroplast (RPL27) 50S	102.078	98.2006	95.0556	33.7966	32.5979	38.798	20.0017	25.7413	23.2002	93.231	86.4889	90.4465	37.2926	31.7948	33.1447	21.8728	23.2666	22.6667	107.325	103.46	95.1981	35.1985	33.1821	38.4528	24.5639	18.9756	28.9419
VIT_14s0068g02160	Ribosomal protein S21	39.9318	37.8129	46.0387	25.5492	27.167	24.9867	10.446	14.5283	16.3804	38.3191	32.1044	41.6667	27.7998	22.0465	26.8138	11.1791	12.5658	14.7459	39.8843	41.3853	46.7569	25.8026	24.8767	26.287	9.37924	8.81336	18.6691
VIT_14s0083g00970	Ribosomal protein L7A (RPL7aB) 60S	244.501	256.336	167.272	202.863	212.328	185.261	200.311	225.83	214.314	246.75	255.13	206.397	216.42	200.755	182.906	219.8	212.621	229.058	249.188	280.895	167.552	206.016	195.128	213.746	213.171	212.354	216.183
VIT_14s0108g00460	Ribosomal protein S9 (RPS9C) 40S	613.736	606.406	587.514	332.26	430.45	344.218	199.177	251.952	238.56	573.178	596.495	630.955	380.53	328.168	324.091	219.172	222.944	243.194	632.775	718.951	638.844	350.53	403.712	361.542	225.627	205.121	276.964
VIT_14s0108g00850	Ribosomal protein L34 (RPL34A) 60S	1360.94	1260.83	1255.68	240.187	257.26	259.164	131.001	164.054	126.647	1100.26	1118.16	1219.07	248.896	218.143	207.783	142.745	125.368	118.268	1176.42	1403.33	1389.03	256.716	230.228	302.356	150.607	112.289	166.169
VIT_14s0108g01100	Ribosomal protein L32	16.7423	16.8131	14.6589	12.8873	14.1747	11.7392	13.1656	16.3975	18.7188	19.7289	16.8187	18.1889	14.4193	11.1118	13.1953	13.3537	18.1137	13.0513	19.3131	21.1084	13.6841	11.1284	14.0702	12.3555	14.24	16.7039	18.8642
VIT_14s0171g00250	Ribosomal protein L13	18.0234	17.1811	13.6627	13.8665	15.5486	14.0533	16.1096	13.7636	11.7762	17.9143	12.222	16.1546	15.1846	12.8625	13.4843	15.6911	13.7922	12.3391	17.6578	15.0862	15.3329	12.7791	14.3718	14.1216	14.7281	11.9347	13.4615
VIT_15s0021g01000	Ribosomal protein L37a (RPL37aB) 60S	308.383	332.272	195.157	225.831	243.464	212.636	218.957	247.258	233.543	341.289	348.474	237.589	236.611	258.758	208.078	228.508	216.059	239.822	295.928	410.06	199.067	249.588	225.983	250.798	239.649	221.412	234.376
VIT_15s0021g02480	Ribosomal protein L15 e	275.428	272.31	201.769	255.974	261.806	227.008	229.612	213.844	218.587	260.916	237.194	219.674	250.068	258.69	249.546	226.537	209.377	217.658	270.882	289.305	211.342	242.68	257.371	241.58	219.174	203.173	214.185
VIT_15s0024g00390	Ribosomal protein L3	77.4524	72.2565	76.8632	36.2741	33.9765	38.6061	31.5662	32.5211	35.1619	70.6896	61.7086	74.3834	37.5498	32.504	36.1891	32.6193	30.5926	33.2729	78.081	78.2018	82.9262	34.3923	32.1793	35.5945	34.6474	26.0223	38.5372
VIT_15s0045g00630	Ribosomal protein S15	23.8956	25.1477	18.452	22.7426	24.4441	22.7566	31.138	28.0159	30.1432	26.2414	25.7217	22.6052	25.1102	27.127	20.7668	31.7702	30.5065	33.9953	25.0793	32.9956	18.7697	24.7315	22.1847	22.373	30.9778	28.0653	27.4966
VIT_15s0045g00770	Ribosomal protein S15	5.85746	7.05266	5.11384	3.02817	4.41382	4.74644	6.53983	6.88857	7.2814	6.02407	6.22046	6.00065	5.35696	4.45787	4.28572	8.85863	8.27857	3.53407	6.05675	5.75855	5.12512	3.42764	5.16903	5.5393	7.60363	10.9408	7.60651
VIT_15s0045g01340	Ribosomal protein L18 50S	12.4086	11.3835	10.5618	8.45338	6.71347	7.84312	4.27576	4.16121	5.88108	12.7916	8.49993	11.3779	9.03456	6.60841	5.35832	4.87403	4.9347	5.54135	13.4676	9.71575	12.8453	10.693	5.96437	8.07205	3.75019	3.65404	5.76136
VIT_15s0046g01780	Ribosomal protein L5	73.7218	66.4104	60.0696	21.4985	22.6658	27.323	15.4463	20.4089	18.7988	73.2298	60.553	57.6642	23.7128	18.4014	20.844	13.5421	17.1881	18.1627	69.0836	85.4926	62.3391	23.823	21.5223	27.2679	15.2286	14.7881	21.2625
VIT_15s0046g02690	Ribosomal protein L36 (RPL36C) 60S	179.395	187.498	152.896	90.6335	86.346	89.1411	43.4427	55.3797	56.2131	182.722	174.5	156.176	97.2923	83.9418	75.3486	45.8437	48.2102	60.6063	189.257	210.768	164.088	107.123	81.5619	112.442	45.5402	46.3598	56.0425
VIT_15s0046g02910	Ribosomal protein L21, chloroplast / CL21 (RPL21) 50S	40.3688	39.564	32.9669	16.3011	12.5702	20.0052	6.08842	7.7581	9.68875	46.6309	40.1401	33.2908	17.7865	14.9935	16.1356	6.10924	7.14708	12.6599	43.1884	42.1385	33.5624	19.6278	13.3487	21.5479	6.00193	5.34857	11.6464
VIT_15s0048g00670	Ribosomal protein S13 (RPS13A) 40S	451.518	471.372	398.396	437.183	425.456	425.758	364.512	396.002	430.09	434.525	476.565	423.88	409.632	436.263	382.792	369.353	339.245	499.875	452.729	545.41	412.603	495.836	382.814	425.464	401.268	363.323	369.468
VIT_15s0048g02610	Ribosomal protein P1 acidic 60S	81.5761	79.8858	54.4987	33.0075	51.2028	34.2197	36.3792	34.0126	27.0582	78.6925	81.3568	71.0847	49.04	36.9744	35.7439	43.319	33.5378	24.9442	92.5085	104.039	54.4026	40.5302	49.5117	39.8864	40.5194	32.1379	33.0612
VIT_16s0013g02020	Ribosomal protein L15e	34.7702	35.4819	23.9991	21.7927	30.9289	22.5221	22.7665	21.0421	19.2053	36.8803	36.007	28.0986	25.6727	20.4204	20.978	19.5924	20.4197	16.7486	31.4626	43.8755	23.2997	21.5282	27.8517	23.3589	18.4402	17.2679	23.2829
VIT_16s0022g01460	Ribosomal protein S20 (RPS20A) 40S	751.849	740.004	710.417	604.115	669.047	567.235	475.888	552.086	488.704	688.704	702.308	703.656	597.504	561.984	512.063	465.469	457.983	459.351	743.004	874.068	750.057	605.171	603.782	620.962	541.821	503.032	483.39
VIT_16s0022g01590	Ribosomal protein S13 (RPS13A) 40S	89.3046	82.6148	68.0589	63.6497	79.593	61.7323	61.348	55.4099	47.1238	79.3087	83.8505	84.989	76.9765	62.0484	61.8276	67.6215	58.0727	38.3065	99.5056	105.453	68.2534	62.8606	82.0331	70.5923	64.8867	57.3821	51.8378
VIT_16s0039g00380	Ribosomal protein S14 30S	16.9551	13.8121	13.3375	56.0864	15.6978	27.5912	11.454	13.0234	30.0609	12.558	12.3064	12.7061	16.4605	18.5242	8.50274	11.6343	13.538	17.4875	12.5797	10.7848	12.3044	17.0247	35.4779	59.446	13.7482	12.3476	15.0266
VIT_16s0050g00610	Ribosomal protein L36 (RPL36C) 60S	377.386	398.296	299.157	367.411	300.241	346.928	439.125	422.381	414.58	391.222	354.449	317.326	350.796	401.104	330.093	466.119	383.779	525.743	376.748	472.258	308.262	391.428	281.064	394.901	476.11	429.775	342.994
VIT_16s0050g00860	Ribosomal protein L31	6.82302	5.21357	9.94952	4.8779	8.6639	5.76946	8.38404	9.58776	6.94712	4.49077	4.45106	7.5307	7.90978	4.55057	5.74065	7.52339	9.00841	3.49743	8.49325	8.39871	10.2067	3.26992	10.7246	4.43802	8.79816	7.46321	8.10504
VIT_16s0050g01160	Ribosomal protein S10 (RPS10C) 40S	275.061	277.927	221.822	231.88	287.709	229.735	269.512	296.094	276.188	255.696	269.014	247.601	251.755	239.15	230.273	276.511	273.501	245.587	289.598	336.531	228.207	247.635	265.818	244.145	288.167	285.355	278.289
VIT_16s0098g00730	Ribosomal protein L9 (RPL90A/C) 60S	236.825	214.018	230.693	152.088	177.307	161.072	90.896	109.523	101.611	214.149	197.393	236.021	160.439	145.656	155.778	94.9374	105.71	101.006	234.259	258.499	238.262	151.848	170.457	172.159	92.2852	101.23	124.472
VIT_16s0098g01010	Ribosomal protein P1 (RPP1B) acidic 60S	191.708	166.584	185.01	119.498	195.872	126.729	208.512	229.677	164.914	155.551	175.316	197.353	151.642	102.273	126.388	216.282	211.273	110.189	209.049	236.72	196.957	109.332	177.309	116.087	240.832	222.97	182.689
VIT_16s0098g01100	Ribosomal protein L24 60S	107.261	78.4405	98.8111	144.285	151.246	139.105	125.146	157.325	130.628	92.6975	70.5171	90.6803	156.302	98.2402	131.289	134.005	151.728	105.945	100.868	90.8912	97.2876	130.58	163.149	152.119	143.876	144.801	148.226
VIT_16s0098g01670	Ribosomal protein L9	16.3833	15.9381	15.3648	11.2218	10.4907	13.3713	11.0208	11.7073	11.6059	16.1135	16.0952	15.9398	11.2557	10.7748	12.718	11.9707	10.6678	12.9098	16.0227	16.3435	16.7402	12.6827	11.2166	13.0726	10.3405	10.4892	11.6067
VIT_16s0100g00650	Ribosomal protein L24 60S	282.589	308.597	233.971	207.829	191.643	192.106	200.191	208.298	198.846	281.351	267.005	232.047	208.576	215.266	192.983	202.604	189.192	245.371	270.794	333.959	242.272	215.002	192.551	241.619	220.783	209.929	201.908
VIT_16s0115g00080	Ribosomal protein L35	11.8324	14.4959	13.0233	7.09336	7.04709	8.29312	3.84828	3.48019	5.30179	13.5271	10.1949	11.6833	7.40606	5.89175	7.3407	3.99708	3.91796	4.01689	12.1974	14.1936	14.5604	5.67113	6.89602	8.72741	4.13136	3.05974	5.64542
VIT_16s0115g00310	Ribosomal protein L35	32.4431	31.1762	38.003	15.7863	15.766	21.684	9.62946	9.63668	11.1937	32.9019	26.4583	33.7255	21.5983	17.0688	21.1459	9.58377	9.07045	10.725	34.336	39.4755	36.4278	17.2062	18.2934	19.6269	9.28422	7.4522	11.2358
VIT_17s0000g00980	Ribosomal protein L7A (RPL7aB) 60S	268.668	267.813	257.596	215.056	227.522	196.72	146.727	208.094	163.948	250.218	263.483	270.16	208.409	194.838	185.985	159.042	168.531	174.369	268.756	318.101	270.824	214.471	200.867	233.074	174.031	171.72	174.414
VIT_17s0000g01520	Ribosomal protein L17 (RPL17B) 60S	162.6	159.77	142.242	139.333	160.018	133.179	145.239	145.646	129.019	153.449	155.739	152.318	148.494	137.132	124.471	143.811	132.59	127.93	157.104	194.46	143.399	146.865	153.452	140.558	145.786	137.722	132.321
VIT_17s0000g02150	Ribosomal protein L19	2.27672	2.22237	1.6674	16.3219	10.446	16.7844	10.9964	13.6568	11.8181	1.65465	2.79131	1.72263	12.9002	8.72635	15.178	11.3264	10.0719	10.4369	3.67694	1.90693	1.85235	17.197	10.48	15.8574	10.5532	12.0996	14.0118
VIT_17s0000g03530	Ribosomal protein S7 (RPS7A) 40S	266.878	273.726	246.83	178.438	207.971	183.989	179.641	186.712	178.428	253.93	291.865	266.137	192.286	181.765	179.639	182.691	172.187	166.031	276.936	346.863	253.649	193.219	199.591	191.238	197.129	177.264	179.334
VIT_17s0000g05970	Ribosomal protein S9 (RPS9C) 40S	145.001	144.503	113.445	108.492	148.479	108.695	231.269	192.261	170.727	140.996	148.049	134.713	139.978	126.849	122.676	249.952	191.953	166.97	163.914	186.885	113.749	120.547	142.621	124.084	251.724	207.626	188.126
VIT_17s0000g06980	Ribosomal protein S19 (RPS19C) 40S	752.14	758.805	632.786	499.707	529.699	472.501	324.761	379.934	378.579	715.205	697.297	640.452	473.354	429.081	445.07	333.987	329.324	371.813	728.289	923.749	664.926	499.84	484.948	556.091	348.601	340.771	411.19
VIT_17s0000g07870	Ribosomal protein L29	20.4451	17.0103	15.4833	36.4875	39.8545	36.6301	57.9186	50.2289	44.9109	18.6172	15.1076	15.8702	36.7514	31.4752	33.4934	59.521	48.1905	35.872	17.5906	18.8488	15.9702	31.4658	38.6354	36.1668	58.3139	50.5807	40.6612
VIT_17s0000g08500	Ribosomal protein L12	14.7607	13.093	16.6005	14.4204	13.0721	13.2402	16.8671	14.3318	16.3498	15.0611	14.2941	16.7569	15.337	15.0732	14.1791	17.4232	15.93	18.6757	15.5525	12.892	16.3382	14.1271	12.3252	13.5046	19.1972	15.9551	16.0561
VIT_17s0000g09110	Ribosomal protein L27A (RPL27aC) 60S	206.343	204.797	136.976	139.816	175.452	127.603	229.183	301.945	261.452	201.535	217.916	154.051	156.329	144.33	146.218	230.416	276.805	265.887	211.764	256.734	138.223	139.475	152.16	138.689	247.009	269.248	296.594
VIT_17s0000g09390	Ribosomal protein L19	18.0422	20.7844	11.5501	13.2652	12.1367	14.3151	17.3328	14.8178	18.1065	23.8985	19.6322	15.3444	14.2718	14.0124	15.5856	18.5132	17.9462	22.545	20.4214	19.4115	12.3243	14.7591	12.1514	15.0717	16.6148	16.2501	19.1325
VIT_17s0119g00050	UBQ5 (ubiquitin 5)	237.463	245.405	204.973	176.28	207.945	160.783	147.768	134.247	134.849	238.306	259.908	234.975	183.746	183.633	176.088	147.778	136.526	139.525	250.331	313.013	210.49	173.231	186.186	179.325	148.651	142.264	147.034
VIT_18s0001g02600	Ribosomal protein S1, 30S	3.86993	3.78129	5.16726	4.78445	4.14047	4.92313	4.34039	4.24514	4.84084	4.63569	3.72814	5.00979	5.50118	4.88703	4.48378	3.63127	4.47972	5.65412	4.38864	3.24994	5.73765	5.11649	3.96296	4.57415	4.45953	4.56654	4.97105
VIT_18s0001g03850	Ribosomal protein S10 30S	50.2643	53.1939	55.6343	25.7285	23.1713	28.7379	11.7606	15.9162	21.1916	59.613	50.3356	50.3189	26.121	26.5669	29.5264	12.5204	17.6819	22.1429	56.6187	55.2063	54.1963	26.5964	21.9321	31.1027	13.6584	14.0864	20.8701
VIT_18s0001g04760	Ribosomal protein L30 (RPL30B) 60S	15.234	13.9841	13.0919	9.60168	8.60917	11.6953	2.7628	3.60287	5.40588	12.8123	10.1974	13.1503	9.87457	7.711	8.57139	3.19792	2.43215	3.44375	13.8542	12.2099	10.1908	8.60089	8.94338	10.5909	2.57587	2.75365	5.71134
VIT_18s0001g11750	Ribosomal protein S9	43.3272	41.1504	47.1816	14.3581	9.38549	15.3557	6.59008	7.16791	7.71892	42.4553	35.5501	39.859	14.0829	10.1719	14.2421	6.33677	5.80423	8.54042	43.4333	35.1511	49.5075	13.6974	10.1297	14.7152	5.83442	5.22445	8.90925
VIT_18s0001g12850	Ribosomal protein L31	61.1869	55.9076	69.954	60.6749	67.1662	61.01	62.3888	63.4296	62.1665	62.5299	48.4627	60.4257	67.1308	55.2061	57.3629	61.5551	62.3022	53.1065	54.187	62.478	76.5787	57.0978	59.1536	62.8597	66.2893	63.8244	61.5232
VIT_18s0001g14510	Ribosomal protein L28	18.3456	18.686	19.4973	20.027	19.3089	17.2629	23.4878	23.0326	23.9617	19.4401	18.5102	20.2344	21.9061	23.797	17.7611	21.3781	22.6238	26.1005	18.1942	18.1305	21.0671	23.4188	18.6056	19.8261	21.3636	22.3709	20.4255
VIT_18s0072g00060	Ribosomal protein S18 (RPS18C) 40S	81.8933	82.5504	66.6814	73.8968	67.4954	80.0964	59.5437	74.3426	76.017	81.9371	75.5052	65.0288	70.513	73.4741	70.5787	66.3601	67.8282	82.3747	74.0643	93.0197	64.1	77.7045	69.9923	80.1997	61.1077	68.1824	82.0936
VIT_18s0072g00340	Ribosomal protein L3 (RPL3B) 60S	430.23	439.138	392.939	265.853	281.281	261.618	259.328	284.161	272.036	403.204	453.607	416.953	272.109	269.602	245.551	270.344	257.262	272.74	417.271	508.475	411.001	272.348	265.908	297.757	283.321	277.688	279.227
VIT_19s0014g00400	Ribosomal protein L13	37.0691	35.4331	27.5099	23.582	19.2504	25.7894	18.7651	16.1951	18.8126	41.2165	29.9386	27.4129	22.8658	19.0948	20.9696	15.7052	15.9369	17.0225	34.8576	32.4811	30.2107	25.1107	19.907	25.3425	17.4453	13.3579	20.0945
VIT_19s0014g02230	Ribosomal protein S20, Chloroplast 30S	38.1512	34.2208	35.3915	32.1141	28.9071	35.2393	17.7555	20.1149	20.3232	35.5182	29.6255	29.7513	30.2404	23.4818	29.5995	17.2648	18.003	18.731	39.3885	41.3568	35.3636	30.7749	30.6797	35.1144	17.1136	14.5436	21.0952
VIT_19s0014g02270	Ribosomal protein L11 methyltransferase	0.249879	0.274799	0.264526	0.11561	0.241306	0.239801	0.14568	0.242704	0.334606	0.519887	0.304518	0.423432	0.322969	0.0989441	0.349938	0.251925	0.118987	0.298996	0.199597	0.310568	0.616756	0.321162	0.293769	0.633911	0.281047	0.413087	0.270515
VIT_19s0014g02290	Ribosomal protein L11 methyltransferase	0.739001	1.02672	1.21436	0.301794	0.389623	0.325486	0.404111	0.393004	0.537623	0.678763	0.578501	1.16143	0.259058	0.451281	0.354363	0.535653	0.618779	0.511732	0.827495	0.592393	1.12541	0.388713	0.591114	0.843819	0.530283	0.416262	0.629879
VIT_19s0014g02520	Ribosomal protein S8, Chloroplast 30S	0.839152	0.570583	0.655546	2.1061	0.228053	1.13712	1.04195	1.53641	2.08484	0.864244	0.853054	0.595888	0.948195	1.19015	0.535513	1.03624	0.598608	3.53076	0.61427	0.400761	0.529962	1.22217	0.518226	2.28413	0.554061	1.04921	1.38786
VIT_19s0014g02680	Ribosomal protein S2	14.6075	12.6907	14.1415	10.4521	12.3205	11.0061	7.50267	5.74747	5.91891	11.5773	11.2232	14.1006	11.8766	10.5244	10.3356	7.1855	6.67421	6.01754	13.9902	13.2399	13.8191	10.2034	9.71194	11.611	6.30342	4.59213	5.48188
VIT_19s0014g04760	Ribosomal protein L8 (RPL8C) 60S	98.0973	82.8562	98.0064	68.0854	97.5564	64.0541	79.8941	61.3197	54.231	83.283	82.1847	100.102	82.4969	67.4816	80.4724	77.0886	62.9092	50.7467	98.6577	101.853	94.9948	65.9399	85.0327	72.2584	80.6715	51.8742	63.3331
VIT_19s0014g04970	Ribosomal protein L24, chloroplast (CL24) 50S	56.9989	59.4596	47.974	27.849	22.5331	35.8858	11.4634	17.2702	22.7311	61.4066	48.3782	47.3351	31.6249	27.7986	31.3973	9.76608	15.5855	24.8558	58.3992	60.7843	54.0769	33.8107	24.0251	34.2469	11.471	12.4566	27.0271
VIT_19s0015g00140	Ribosomal protein S10 30S	62.046	60.6732	54.9556	31.7016	23.3609	35.8408	21.563	23.3372	31.6182	66.6987	57.3125	53.3094	34.3517	27.9194	31.2628	24.8592	22.3154	32.299	62.2266	61.9223	57.0422	32.2569	26.5244	34.3009	21.7814	19.8582	29.4478
VIT_19s0027g00710	Ribosomal protein L27 (RPL27C) 60S	169.702	161.57	150.654	117.962	118.15	104.248	148.609	137.93	132.958	144.708	141.158	144.017	105.389	103.257	96.4723	135.86	122.453	157.991	170.916	191.122	149.812	114.869	108.831	114.456	138.196	141.781	135.743
VIT_19s0090g01570	Ribosomal protein S8 (RPS8A) 40S	588.614	609.782	626.012	311.428	335.136	318.541	305.67	339.759	302.246	576.627	611.896	628.885	326.27	336.672	299.822	320.662	308.383	336.29	579.603	801.624	646.981	329.412	292.898	345.746	340.004	309.033	316.473
VIT_19s0135g00070	Ribosomal protein L18A 60S	68.7011	70.3485	65.979	104.184	118.419	106.739	65.2404	70.0838	61.6362	68.9739	65.1589	67.3139	102.127	90.7953	95.4637	69.535	65.1085	62.2959	67.8514	70.9262	67.861	105.443	105.688	105.304	60.7246	57.466	61.7671
VIT_19s0135g00100	Ribosomal protein L18A (RPL18aB) 60S	57.6503	56.7534	39.4213	50.6597	41.0858	44.1034	23.6726	30.182	33.7126	59.9459	51.5128	42.6507	52.6885	51.4543	49.1571	26.4179	31.9845	42.5128	55.5413	54.7539	40.5564	58.2065	43.0135	50.2054	22.5011	29.9606	36.0971
VIT_06s0004g02840	Ribosomal protein L12 (RPL12C) 60S	114.835	115.022	79.1517	74.4183	101.49	65.7763	130.617	118.736	105.406	116.292	111.172	90.6743	77.9957	76.7436	73.0246	129.055	119.29	104.524	121.083	148.86	81.4316	72.4767	80.8324	70.8694	128.697	114.475	112.769
VIT_08s0040g01870	Ribosomal protein L12 (RPL12C) 60S	192.131	175.234	134.791	189.215	222.947	173.887	192.967	191.73	181.611	167.021	163.181	152.176	203.298	191.619	178.178	198.184	182.111	189.345	204.772	188.004	139.107	192.853	211.543	187.699	187.64	169.459	191.261
VIT_13s0019g04300	Ribosomal protein L12 (RPL12A) 60S	122.142	110.202	113.121	42.7014	68.0102	42.7109	20.0731	18.232	16.1949	99.7166	105.767	125.63	47.8457	35.6185	38.2098	22.021	20.1729	14.3181	128.182	126.793	118.576	39.0948	50.1214	40.9076	20.1618	15.6631	20.9167
VIT_03s0017g01350	Ribosomal protein S6 (RPS6B) 40S	351.628	382.555	257.109	421.413	433.368	370.763	374.203	424.378	406.397	357.841	370.625	282.429	409.113	449.693	368.902	395.468	367.351	455.848	344.334	466.212	259.42	431.365	404.373	413.055	412.541	388.443	389.371
VIT_07s0191g00060	Ribosomal protein S6 (RPS6B) 40S	47.5745	49.3771	28.1083	46.7685	46.2775	43.5088	67.1704	76.3501	70.6584	53.085	48.9835	37.4685	51.2594	52.9037	41.5247	71.8316	71.5867	82.9974	52.0759	58.4855	28.4301	51.0918	43.3605	48.0151	74.3736	72.5431	63.6238
VIT_18s0001g06290	Ribosomal protein S6 (RPS6B) 40S	365.929	368.6	344.387	199.085	241.37	201.628	209.77	220.856	191.065	324.779	343.808	361.308	215.733	191.241	199.466	213.69	204.257	177.157	370.605	467.134	341.802	196.182	221.453	229.247	227.276	211.464	213.769
VIT_00s0186g00020	SUM2 (small ubiquitin-like modifier 2)	83.4779	87.8644	62.9301	65.891	106.264	71.9398	76.8725	130.071	139.229	88.7947	97.0862	74.6678	81.5608	91.7592	69.419	89.6643	109.87	132.216	89.6437	112.969	57.4484	79.2474	99.0308	65.2172	85.7691	106.889	125.219
VIT_00s0186g00080	SUM2 (small ubiquitin-like modifier 2)	66.3582	63.1005	51.1367	68.0675	78.777	66.4956	83.9592	110.885	114.491	59.7284	63.0122	56.5543	73.0707	64.7381	67.3825	84.4898	93.6567	97.9842	63.385	79.3053	49.5202	61.6934	74.2612	65.6803	82.6254	95.2921	116.996
VIT_00s0252g00070	Translation initiation factor eIF-3 subunit 5	144.202	148.516	131.921	155.104	141.657	160.371	173.447	164.32	159.165	142.08	144.197	144.384	148.523	162.905	146.785	175.262	152.327	160.485	141.323	144.664	134.528	168.835	153.727	175.092	170.605	164.639	144.008
VIT_00s0672g00010	Translation initiation factor eIF-2B gamma subunit	7.80703	8.50035	6.23017	4.73935	5.88967	5.64059	12.8356	14.0381	15.9404	8.21075	9.26596	6.34482	5.53778	6.317	5.70212	12.7617	15.0844	13.8058	6.68618	12.0732	5.77915	5.84456	5.54439	5.25113	13.7113	16.5659	12.8552
VIT_00s0880g00020	Translation initiation factor eIF-3 subunit 7	63.8365	62.4726	57.1034	62.5533	69.997	55.2546	118.917	98.3728	98.1574	57.7604	65.9742	66.8818	63.8277	64.2803	62.9914	115.383	102.24	103.527	67.6098	68.0676	57.8014	59.6883	61.272	56.4986	116.627	103.771	88.9516
VIT_01s0011g06630	Translation initiation factor eIF-3 subunit 2	90.722	87.8159	78.1252	106.282	109.882	92.9066	142.376	134.397	139.483	84.888	91.9359	94.9991	110.876	118.001	102.209	141.357	129.097	143.26	95.1389	92.0537	83.3037	116.693	112.063	105.012	145.716	133.693	124.178
VIT_00s0215g00040	Proteasome 26S regulatory subunit (RPN2)	18.6117	17.8695	30.9931	40.7554	41.4219	34.1144	52.4343	44.0143	39.5684	17.316	16.4875	28.0861	37.9225	40.7041	37.1242	49.103	43.8004	36.8921	20.8162	14.9772	33.1251	39.9184	41.7368	33.5386	49.612	48.4963	33.5267
VIT_00s0215g00050	Proteasome 26S regulatory subunit (RPN2)	27.4826	23.5908	43.72	51.8826	56.9005	42.648	80.602	70.4318	58.2413	23.4935	21.3912	39.1483	52.932	46.3273	54.2289	81.7961	70.5382	47.1834	29.8146	20.9154	47.4438	44.3535	57.3897	43.8416	77.4966	73.7251	55.6345
VIT_01s0010g02900	Proteasome 20S beta subunit E1 (PBE1) (PRCE)	128.417	112.15	120.05	287.296	294.094	280.542	419.087	380.575	388.478	121.196	105.111	121.56	286.498	300.059	272.632	419.337	368.533	409.761	116.377	119.142	122.147	297.196	297.852	261.312	423.028	375.228	323.121
VIT_01s0011g01960	Proteasome 20S alpha subunit B	93.9327	83.6168	84.8436	168.899	197.65	176.266	254.199	267.038	249.728	91.5861	76.4405	90.4426	178.962	168.999	180.688	268.574	253.489	207.576	89.9016	80.2071	85.3138	164.871	194.285	177.634	262.373	260.572	225.461
VIT_01s0137g00420	Proteasome 20S beta subunit B (PBB2) (PRCFC)	127.336	117.624	122.747	172.139	168.366	172.643	160.312	157.559	148.629	121.392	112.955	123.78	179.084	169.234	169.736	169.056	150.659	149.918	124.796	122.586	127.269	171.984	181.665	175.394	153.844	144.214	144.307
VIT_01s0182g00070	Proteasome 26S regulatory subunit (RPN6)	17.5416	15.629	16.7495	17.897	17.3102	15.6471	15.7644	14.7123	17.089	17.4771	14.4511	19.1659	16.5147	18.2944	14.6536	17.1657	17.9154	21.1382	17.2479	15.471	15.8639	18.6107	13.2739	16.527	16.0524	16.0546	14.7607
VIT_02s0012g02660	Proteasome 26S regulatory subunit (RPN9)	82.2512	71.6681	70.0492	114.717	106.74	105.49	159.148	159.327	149.313	78.2876	71.3098	75.3516	109.164	112.397	111.356	162.846	155.171	145.317	82.1498	68.8103	71.7557	112.062	116.005	104.506	162.001	162.421	132.795
VIT_02s0025g01490	Proteasome 26S regulatory subunit (RPN8)	23.9654	18.7631	32.8387	18.6086	19.3334	20.8193	15.0416	12.6975	10.2096	20.8609	17.82	33.7761	20.5552	19.2727	19.038	15.2248	12.096	11.2169	27.3604	15.6338	34.2691	20.7282	18.4392	20.732	14.8156	11.341	11.3589
VIT_02s0025g02010	Proteasome 26S regulatory subunit (RPN12)	78.188	75.757	71.5108	93.7725	115.424	91.5098	128.357	138.75	134.736	77.6494	79.8203	75.851	104.229	99.1926	102.288	131.786	136.733	115.788	82.2903	99.0561	74.7605	89.5295	120.909	88.2229	133.32	139.263	129.549
VIT_03s0038g02300	Proteasome 20S alpha subunit D2 (PAD2) (PRS1) (PRC6)	71.742	67.2251	65.9435	118.822	105.127	112.391	206.444	203.357	227.887	76.2232	64.5756	71.7041	109.514	131.73	115.227	208.601	207.526	253.787	68.4245	73.3512	70.7805	123.705	105.635	116.781	210.205	211.666	180.564
VIT_03s0038g02590	Proteasome 26S regulatory subunit S3 (RPN3)	54.9307	47.0973	59.4941	65.4576	67.6417	64.7374	84.0018	71.7406	73.6822	51.6302	46.6538	61.5547	69.3875	60.5558	69.7309	88.7357	79.4637	68.196	55.4474	47.7176	63.6352	58.7234	72.0706	65.8278	82.0614	77.9592	75.4808
VIT_03s0038g02720	Proteasome 26S regulatory subunit (RPN2)	12.9406	18.3822	10.2645	4.10377	3.51846	4.57552	3.2368	4.33499	3.67262	17.0911	20.1615	15.2815	6.45617	7.36598	4.82157	2.69265	3.8593	5.71932	12.327	16.8495	11.1941	6.12954	3.67457	6.5026	2.51086	4.2584	4.00019
VIT_03s0038g04350	Proteasome 26S AAA-ATPase subunit (RPT4)	70.5066	68.8058	70.0763	84.5105	89.8449	86.608	90.9245	89.5767	93.4268	67.176	65.8987	74.1184	85.8895	86.2315	84.3273	93.2422	86.8432	84.558	70.053	74.3633	71.7176	90.1305	94.4896	85.8796	90.8042	86.4321	80.4909
VIT_04s0008g02850	Proteasome 20S beta subunit A (PBA1) (PRCD)	34.8663	33.3249	38.8537	58.1357	59.9422	64.5775	55.1109	52.1859	50.14	35.6331	34.1739	37.4212	57.3229	63.45	51.7024	57.1858	52.9767	46.2968	33.1708	38.5762	37.1307	62.136	63.9333	65.8965	52.8558	49.5564	40.3567
VIT_04s0008g04690	Proteasome 26S AAA-ATPase subunit (RPT6a)	83.7501	80.8363	86.5129	155.577	150.743	152.373	198.331	162.178	154.904	85.9834	80.3908	88.2996	154.863	163.455	154.105	197.778	157.954	158.754	84.8748	75.8041	89.6302	166.907	148.703	147.596	202.891	159.571	133.304
VIT_04s0023g03620	Proteasome 26S regulatory subunit S5A (RPN10)	113.671	106.531	104.835	168.015	164.85	165.481	276.016	259.395	243.028	104.848	103.221	109.887	158.18	177.991	157.325	265.141	238.225	220.109	102.117	116.359	103.794	167.049	165.076	158.576	265.95	257.119	208.498
VIT_04s0023g03690	Proteasome 20S alpha subunit D2 (PAD2) (PRS1) (PRC6)	58.6332	49.6515	58.5159	89.0147	84.0727	80.9058	66.4811	70.2546	76.3525	57.9348	43.2014	58.1341	84.6119	80.2655	80.4571	67.0779	62.677	81.9974	53.7948	50.4582	57.7348	84.8246	76.4186	79.1555	62.5902	59.3169	75.6583
VIT_05s0020g01180	Proteasome 26S AAA-ATPase subunit (RPT5a)	30.5087	28.7855	28.2935	21.9799	22.8536	21.5408	16.722	19.3361	19.3196	29.8687	27.6326	29.7977	21.4183	21.7232	21.2513	20.3107	20.3843	21.1622	29.9396	30.2728	29.1038	21.8448	23.5163	22.2804	18.7647	20.0372	18.2607
VIT_06s0004g03190	Proteasome 20S beta subunit G1 (PBG1) (PRCH)	130.954	105.723	118.607	189.197	189.427	190.99	234.824	201.275	189.093	121.906	97.5257	119.348	192.406	179.103	166.932	227.199	179.865	155.483	117.05	104.748	123.799	188.493	193.58	190.875	229.37	183.804	166.594
VIT_06s0004g08220	Proteasome 26S AAA-ATPase subunit (RPT3)	89.7713	77.8467	89.4383	123.209	147.628	126.398	294.136	263.487	269.956	86.3088	81.6993	90.2912	126.957	136.609	141.871	288.955	279.425	227.367	89.7733	85.6544	91.4672	112.649	154.962	117.492	283.341	314.219	229.987
VIT_07s0005g05160	Proteasome 26S AAA-ATPase subunit (RPT2)	146.079	140.012	139.704	239.194	228.419	227.238	195.669	228.644	254.507	142.577	144.524	145.811	226.401	257.184	230.17	198.735	212.484	261.803	139.55	158.08	144.032	253.1	234.754	221.594	203.109	217.836	221.047
VIT_07s0031g01970	Proteasome 26S regulatory subunit (RPN5)	83.695	88.0294	80.4116	127.019	128.571	120.066	166.231	167.098	158.112	84.9705	94.3032	90.3844	122.592	148.298	126.052	163.281	158.088	158.565	88.7186	93.2843	83.7144	144.778	129.659	121.681	164.352	168.137	130.381
VIT_07s0151g00690	Proteasome 20S beta subunit D (PBD1) (PRGB)	111.92	94.9556	117.155	172.085	202.853	170.139	276.471	282.11	251.716	106.016	97.1646	114.367	181.95	167.661	182.44	283.754	284.07	214.593	111.302	110.745	117.934	155.025	202.931	151.715	281.141	284.279	230.279
VIT_08s0007g01340	Proteasome inhibitor subunit 1 (PI31)	41.3156	47.5179	40.5768	72.8695	79.4654	64.8225	98.4829	88.7034	84.3991	38.4198	50.669	42.9301	66.3502	72.8511	66.7057	90.2624	82.8174	87.0024	44.1865	58.4409	46.4952	76.7767	76.0306	58.9293	89.1139	85.6731	75.7639
VIT_08s0007g01980	Proteasome 26S regulatory subunit (RPN8)	68.3123	59.0667	78.3585	126.657	129.417	129.045	162.092	145.182	137.445	61.6194	54.6024	80.8862	131.938	126.118	134.849	166.297	146.144	120.784	68.1815	54.5289	80.6265	113.723	139.875	129.821	159.107	153.376	132.918
VIT_08s0040g00410	Proteasome 20S alpha subunit G (PAG1) (PRC8)	124.545	116.21	123.508	180.828	157.605	179.13	203.629	184.646	182.816	129.423	103.747	119.327	176.054	197.646	172.019	197.621	168.83	206.277	117.651	126.773	124.08	190.757	162.864	177.523	195.474	170.986	155.39
VIT_09s0002g00170	Proteasome 26S AAA-ATPase subunit (RPT1a)	117.107	102.11	125.205	215.276	206.621	207.027	355.854	341.559	343.685	105.446	97.6122	121.009	203.929	229.985	226.261	351.956	360.06	346.833	114.493	95.7777	122.599	212.361	215.574	203.417	355.651	396.579	300.923
VIT_09s0002g00350	Proteasome 20S alpha subunit E2 (PAE2)	53.3093	48.7991	55.2346	104.115	107.107	105.011	129.676	118.953	109.747	54.3627	41.3458	53.1315	106.236	100.843	99.5058	125.894	111.894	101.357	51.6396	51.7109	54.7866	95.6454	111.697	105.455	120.308	99.4415	110.09
VIT_09s0002g00980	Proteasome 20S alpha subunit A1	131.501	123.951	117.478	164.817	171.239	170.042	194.821	200.788	206.097	124.791	117.027	120.839	166.856	174.392	166.449	193.39	181.52	183.818	125.014	136.162	120.433	175.169	182.625	181.355	208.23	184.977	179.694
VIT_09s0002g05800	Proteasome 26S AAA-ATPase subunit (RPT6a)	23.8076	25.8824	30.6215	57.3666	53.5867	60.5905	61.509	70.6349	68.8813	21.9984	26.4775	31.1075	48.6252	65.1749	53.827	58.6677	62.937	75.4979	21.0509	27.3851	28.874	58.0502	51.5962	54.93	60.0064	65.2521	53.2958
VIT_10s0042g00070	Proteasome 20S alpha subunit C (PAC1) (PRC9)	106.097	100.446	98.1924	172.216	198.855	168.917	271.221	231.863	219.945	102.98	88.2166	99.2043	192.398	182.448	185.555	272.862	226.867	201.587	107.359	103.205	102.177	159.375	193.339	168.795	275.132	217.428	206.901
VIT_10s0042g00800	Proteasome 26S regulatory subunit (RPN2)	36.6731	36.9931	38.4644	49.6679	49.8037	48.7163	61.2688	61.328	53.2558	38.9729	40.1048	40.6165	47.6061	51.2302	46.3742	63.471	60.0666	49.9834	36.0639	36.1743	39.5814	51.2485	48.617	48.2498	66.6781	58.7697	47.8497
VIT_11s0065g00320	Proteasome 20S beta subunit A (PBA1) (PRCD)	78.6294	66.7289	69.4861	136.627	135.295	140.73	137.404	137.971	151.005	72.2141	57.1046	68.2176	138.841	149.682	134.055	145.006	137.568	159.599	73.8512	65.2789	70.7238	140.169	142.944	133.086	135.2	134.737	123.812
VIT_12s0028g03130	Proteasome 26S regulatory subunit S2 (RPN1)	76.3201	71.4363	90.1172	121.183	127.452	123.451	241.832	192.156	167.759	74.0818	71.6133	87.4522	126.847	120.524	126.278	229.586	192.747	139.453	73.2183	71.4633	89.1667	119.586	132.401	120.158	234.794	200.427	145.129
VIT_14s0030g01670	Proteasome 26S regulatory subunit (RPN6)	55.5304	54.022	49.1732	87.1343	91.0135	73.298	80.3671	71.9149	71.3844	48.6512	51.8139	54.4477	79.994	72.8667	87.8074	82.8267	70.4902	60.1184	53.9835	59.0273	54.4648	79.5584	94.5673	80.4703	77.6824	68.7424	74.0027
VIT_14s0060g02260	Proteasome 26S AAA-ATPase subunit (RPT5a)	130.731	135.676	114.08	236.612	244.162	214.036	408.437	472.013	471.852	128.969	135.819	123.211	212.463	240.561	213.634	404.958	419.721	443.592	116.507	161.124	118.824	230.995	227.952	205.244	413.077	466.85	399.37
VIT_14s0081g00220	Proteasome 26S AAA-ATPase subunit (RPT4	0.033739	0.129676	0.145841	0.323319	0.0540093	0.138632	0.427046	0.230023	0.299561	0.126116	0.251051	0.127581	0.0627967	0.178722	0.224025	0.452475	0.212235	0.120374	0.0359607	0.0742173	0.19011	0.148005	0.131695	0.20079	0.401053	0.195879	0.1686
VIT_15s0048g00900	Proteasome 20S beta subunit F1 (PBF1)	82.235	65.2296	85.9371	131.575	142.973	129.71	165.866	154.378	143.28	78.6967	57.8531	85.226	141.759	109.188	130.877	165.569	152.289	107.657	83.2427	60.3915	90.1997	121.667	157.795	127.302	167.327	143.63	138.397
VIT_17s0000g10250	Proteasome 26S regulatory subunit (RPN7)	84.7882	80.4579	75.59	111.314	113.832	108.266	163.676	164.014	185.239	82.1965	78.6177	79.3435	114.236	111.765	112.29	159.578	154.993	168.958	79.5295	80.7925	77.2066	117.97	123.141	100.187	152.553	176.708	166.227
VIT_18s0001g01120	Proteasome 26S regulatory subunit S3 (RPN3)	23.6866	23.4184	21.7497	52.509	66.2041	47.9327	70.7122	81.7042	82.7027	25.1205	22.7899	24.603	54.2605	66.0058	58.1192	72.4104	80.5217	83.1362	21.2719	25.8382	23.4349	58.0743	64.5442	50.9026	75.3488	79.3782	77.2467
VIT_18s0001g02260	Proteasome 20S beta subunit C1 (PBC1) (PRCT)	101.471	89.6149	94.5288	174.683	189.425	154.269	268.783	263.909	221.981	97.1862	81.4162	89.7768	181.783	162.039	167.628	271.172	249.46	191.037	95.6221	91.4946	91.731	158.958	199.646	154.319	265.101	258.091	197.79
VIT_18s0001g10820	Proteasome 26S regulatory subunit (RPN11)	93.8932	91.7389	98.7113	167.498	171.205	176.456	225.288	189.127	183.98	94.7709	89.6869	99.7012	173.239	174.271	169.878	234.449	188.996	176.893	89.0945	91.3148	99.3794	166.49	179.54	171.085	223.409	197.756	164.417
VIT_18s0001g12760	Proteasome 20S alpha subunit F2 (PAF2) (PRC2B) (PRS1)	74.1425	67.2171	80.4247	99.4424	121.843	104.929	120.885	111.05	102.311	68.6916	62.6523	84.0775	110.022	96.6112	105.212	123.121	109.226	91.0577	71.522	72.8338	77.7649	95.0549	118.632	109.823	114.569	101.802	98.8965
VIT_18s0001g13090	Proteasome 26S AAA-ATPase subunit (RPT4)	16.0215	13.5869	14.4028	19.8657	18.3675	20.5599	15.5386	14.8978	17.2536	16.733	13.6803	15.2996	20.8991	21.0014	21.3731	16.1124	15.0952	16.0027	15.1483	13.3695	13.1452	19.6542	19.9565	21.5136	15.6264	12.8543	16.9817
VIT_19s0015g01270	Proteasome activator subunit 4	68.8424	65.9727	94.5701	100.796	81.129	125.88	54.4229	59.4647	54.8166	56.874	61.3926	104.602	100.388	96.778	103.834	58.4665	60.7068	51.0031	61.7573	53.6533	94.5739	100.606	97.6616	129.1	54.0242	57.4324	51.9526
VIT_01s0010g03360	Signal peptidase complex subunit 1	32.7023	25.7393	33.0491	34.0656	54.8663	31.9478	49.5917	47.9836	39.2219	25.5825	23.9497	34.237	46.0466	27.2016	37.9159	46.4385	48.8933	19.017	34.4099	32.5559	33.7673	25.0278	57.9251	30.4056	49.0615	45.1319	48.8054
VIT_05s0020g02760	Signal peptidase complex subunit 3	4.33731	3.83367	5.06964	0.816292	0.902972	0.501671	0.419903	0.98998	1.04145	5.33527	4.57686	6.54271	0.932553	0.88402	0.911662	0.670695	0.569087	1.47918	4.59864	3.32082	4.8166	1.01258	1.08736	0.844146	0.34231	0.725954	1.26424
VIT_08s0032g01170	Deoxyribonuclease tatD	15.4244	17.0764	15.197	8.6062	8.73341	11.8288	6.9008	6.80701	7.4065	16.7331	15.0627	14.6755	10.2995	10.8648	9.42984	7.96108	8.28071	8.25785	14.6174	16.0214	14.6509	11.4559	9.46094	12.9333	6.33526	6.62897	7.83869
VIT_09s0002g06550	Signal peptidase, endoplasmic reticulum-type	94.5535	86.1274	75.9038	92.6007	95.0783	97.9547	133.864	125.458	124.697	88.4306	85.6024	82.1048	95.8398	85.8472	93.6156	137.118	123.328	114.709	94.9161	107.724	80.351	93.8306	94.5762	95.9317	137.613	122.797	121.083
VIT_11s0016g05130	Signal peptidase, endoplasmic reticulum-type	8.3137	8.32157	8.54434	24.2262	28.171	20.7115	14.3329	23.5917	22.2602	9.01771	6.93339	8.37645	22.5125	21.396	14.7755	14.1205	18.2322	19.8412	9.35688	9.53563	9.76764	35.9618	24.178	23.3738	18.5117	18.2179	17.7432
VIT_13s0019g03400	Signal peptidase complex subunit 2	41.805	42.2523	40.2339	50.7096	41.0587	50.5265	48.4381	49.8663	55.9495	44.4348	35.5185	42.6626	54.5867	47.2311	47.6957	49.9144	49.7847	56.9661	46.6587	40.9495	42.3178	48.6689	49.5364	53.3718	43.0417	48.7685	52.5424
VIT_14s0128g00220	Signal peptidase complex subunit 3	96.734	99.6617	81.2551	72.2369	69.7067	57.4763	40.6238	45.8675	49.6984	101.688	96.7768	87.3778	68.9847	67.5889	56.9806	37.6941	40.2176	50.2078	95.3873	112.403	87.4625	77.9408	66.1203	68.3106	37.0154	37.2272	54.4726
VIT_15s0024g00050	Deoxyribonuclease tatD	52.956	40.6347	82.6895	29.6593	27.3515	32.5793	23.0495	23.5588	25.4138	45.3321	35.8125	67.8677	30.5583	29.1917	29.3805	24.6237	23.3372	21.7712	44.1873	35.7591	73.3356	30.7132	28.9691	31.7614	19.6223	21.4139	22.3248
VIT_00s0551g00030	Protein transport protein Sec61 subunit alpha	105.538	101.403	96.5477	191.913	221.861	157.104	132.049	119.687	127.518	98.6847	103.631	103.226	184.758	204.144	166.604	133.728	102.133	139.826	105.352	99.727	104.94	244.01	198.351	168.826	136.407	88.4301	127.851
VIT_00s1338g00020	Protein transport protein Sec61 subunit alpha	8.69553	7.80085	6.89888	12.1467	17.5836	10.6367	9.68128	9.73664	8.0793	7.16157	7.50884	8.11144	13.2012	11.5169	11.2615	9.25964	6.78034	5.03602	8.64775	9.88447	8.09321	12.1206	16.2454	12.4232	10.3604	6.91	9.81764
VIT_00s2574g00010	Protein transport protein Sec61 subunit alpha	14.0046	13.7726	12.5647	27.6562	27.8804	24.2458	16.6582	14.3845	19.5455	13.44	15.6674	13.7567	24.2045	31.2383	22.9001	16.7679	12.6268	21.9962	13.2573	14.2174	13.476	39.412	25.6327	22.1296	19.4124	11.8429	15.6605
VIT_05s0094g00170	Protein transport protein Sec61 subunit beta	12.9376	17.113	14.0985	6.1187	8.529	7.55583	13.6723	14.1244	12.6542	13.915	16.5186	14.102	6.5045	7.68818	9.11233	14.5221	13.7932	9.85009	14.4972	21.7136	11.6997	7.16215	9.54741	7.52303	14.3575	14.4709	13.7563
VIT_13s0019g04080	Protein transport protein Sec61 subunit beta	3.29254	1.98111	3.20127	1.69739	1.705	1.24521	1.10232	1.34715	1.48726	3.77866	3.03501	4.18017	1.54501	1.54153	1.42397	1.95027	0.790013	0.295379	3.82012	2.52553	3.5273	2.10833	1.50989	0.664173	1.34456	0.574554	1.99538
VIT_14s0068g01940	Protein transport protein SEC61 gamma subunit	374.001	344.218	326.1	441.482	458.361	443.489	489.993	530.936	460.868	354.037	322.56	327.308	454.243	430.825	414.032	491.007	470.45	393.586	369.84	340.336	339.79	429.281	462.134	496.77	514.462	483.474	444.728
VIT_15s0021g02490	Protein transport protein Sec61 subunit beta	43.8891	33.8232	36.228	42.5051	67.0503	42.7745	59.6486	72.7194	58.2698	37.4419	31.9873	33.9345	48.1139	40.4945	42.0983	62.8808	68.8942	41.7443	43.9733	50.1877	40.9852	39.4572	61.1778	44.1924	56.0596	73.878	62.4427
VIT_15s0021g02620	Protein transport protein Sec61 subunit beta	64.3386	48.2598	61.2811	53.2951	100.388	65.3079	105.446	110.461	95.7892	43.3147	38.8913	64.8267	74.2581	52.0003	75.8893	107.68	117.71	67.1898	64.5428	66.3951	64.3622	49.0095	103.452	59.3451	107.165	117.636	103.372
VIT_17s0000g01300	Protein transport protein SEC61 gamma subunit	89.3182	87.0079	70.755	80.4527	100.687	93.1542	123.906	120.321	101.506	90.9696	89.7914	66.4944	92.8108	67.5943	87.5151	141.729	116.021	74.8745	92.3198	108.475	67.6575	72.6572	100.089	106.734	135.63	111.725	119.173
VIT_19s0014g01020	Protein transport protein Sec61 subunit alpha	139.24	123.921	104.188	173.306	195.491	152.004	231.528	225.623	226.336	124.353	148.662	124.087	178.382	188.435	173.895	235.799	221.767	207.223	157.724	126.76	113.32	181.964	204.085	163.393	257.815	242.824	219.101
VIT_06s0004g02280	Translocation protein SEC62	21.5053	22.7205	23.2587	31.8114	30.9613	26.3266	29.4169	26.5697	23.1081	21.6025	22.6717	23.0803	28.6334	29.3017	30.8628	29.4888	23.4487	21.4511	20.4622	25.1223	24.9991	31.7365	29.3208	27.586	29.1927	22.2165	23.3934
VIT_16s0050g01460	Translocation protein SEC63	43.3188	41.3115	44.016	68.6162	65.6538	65.9572	110.353	80.5053	74.8736	40.0704	42.3546	47.616	68.9388	67.4161	70.5597	118.644	86.1215	76.0009	41.2663	42.7634	44.4901	65.4443	68.9211	65.5921	112.53	83.3748	66.8162
VIT_05s0020g03510	P-P-bond-hydrolysis-driven protein transmembrane transporter	15.7876	17.4105	18.4265	15.6324	16.4628	19.5729	17.5987	16.232	19.6873	17.6331	16.6219	17.1945	16.0784	18.6166	17.8652	17.7354	15.9831	22.5794	14.2032	22.4763	17.8535	17.1479	16.9648	18.8218	18.5142	14.427	17.5985
VIT_01s0011g04410	APG2 (albino and pale green 2)	47.8624	46.019	50.4878	29.9177	30.0889	30.6525	30.6588	35.2519	31.4685	42.1917	42.9183	52.0635	32.699	25.6067	28.7368	30.0012	33.464	23.7595	47.619	47.2554	52.8871	27.3121	32.2759	30.7799	32.6775	32.0679	30.9951
VIT_14s0030g02220	Sec-independent protein translocase protein TatA	55.6956	62.2554	47.2885	38.7329	43.4585	40.0418	35.1501	38.2657	38.5598	57.6594	66.093	53.1429	43.1366	37.8846	38.3175	30.7978	31.2497	37.244	58.4131	81.7188	48.8186	43.3265	48.6885	39.942	31.1604	33.6504	43.3199
VIT_16s0050g00800	Sec-independent protein translocase protein TatA	46.3999	38.9278	47.7488	26.6953	24.8909	31.3391	36.5018	37.6638	40.6414	45.7375	31.4708	44.5929	29.8454	27.1495	31.9688	35.9126	37.9486	42.8404	49.0468	39.2037	46.531	30.0365	27.4961	31.9394	32.4489	42.7318	37.0513
VIT_07s0005g02610	Preprotein translocase secA subunit	20.946	23.949	21.4809	13.3133	11.383	16.5851	13.8005	15.6605	17.8316	23.6715	22.6493	20.1888	14.1099	15.5402	14.9661	12.9525	14.9287	18.4637	19.8267	25.6254	21.5816	16.216	11.6819	15.2293	13.9484	13.5194	17.3636
VIT_07s0104g00040	SecY	14.0259	16.4521	16.9629	12.6389	11.0738	18.9891	19.6703	16.9947	16.7365	16.061	15.9362	16.8925	13.7864	13.5961	13.998	18.4769	15.6851	17.5225	12.0708	16.8249	14.6412	15.0363	12.6049	16.0164	19.452	15.3474	14.7557
VIT_08s0007g03160	Signal recognition particle subunit 54 SRP54	32.688	33.8598	31.8623	12.2184	10.2231	16.465	13.0417	14.8285	17.8527	36.6458	27.5878	26.4233	12.9826	13.3315	13.5562	13.2875	14.9363	19.3082	32.2552	34.7526	32.814	14.9471	10.7774	13.859	15.1123	13.4628	15.7844
VIT_11s0065g00940	Preprotein translocase secY subunit, chloroplast (CpSecY)	24.4869	29.7736	33.7742	24.0624	21.7593	31.7548	22.5256	19.6781	17.262	25.3595	29.8012	31.5537	23.3087	23.8372	30.5752	20.3866	17.8918	16.842	23.296	29.6478	36.3528	26.336	23.3251	30.9764	21.6254	15.941	19.555
VIT_11s0078g00220	Preprotein translocase secA	4.01265	3.23052	3.83516	2.12024	1.69046	3.43307	5.26334	2.47481	3.46846	5.40026	3.5792	3.9107	1.37708	2.8218	2.90127	5.73202	4.06273	3.26136	3.74476	2.66654	3.95157	1.61449	2.39549	5.0156	6.04206	4.49502	4.64009
VIT_15s0048g02080	Signal recognition particle receptor protein, chloroplast (FTSY)	17.3937	19.535	22.4504	9.38664	10.4199	11.3624	6.64512	8.29015	8.60022	17.0444	21.722	22.6565	11.338	10.6944	8.75066	7.16416	7.13846	7.90241	19.5392	23.3478	23.4271	11.8493	11.7155	11.9413	7.55337	6.91941	8.93793
VIT_18s0001g01860	Preprotein translocase secA	19.2568	19.6799	24.3668	9.64781	10.0312	14.1081	7.50325	9.0713	9.03698	18.3789	18.4213	24.5744	9.99475	9.66187	12.1313	8.31006	7.94418	7.89769	16.9766	20.7318	22.7907	10.5694	10.8687	13.7198	8.1855	7.9473	10.1667
VIT_18s0001g01930	Preprotein translocase secA	7.81514	8.44789	7.73876	9.12717	8.37262	8.91257	14.7471	11.5625	11.1831	8.09378	8.23947	8.84177	9.67669	9.43112	8.49451	13.1889	11.8189	11.9954	7.60288	9.19054	8.01903	10.0491	7.94401	8.27497	14.9536	12.5473	10.2005
VIT_01s0137g00220	ALB4 (ALBINA 4)	23.0731	18.0088	22.1584	16.6218	14.0619	13.0289	20.506	18.6489	19.8512	18.9138	18.8493	24.4778	15.974	14.1037	13.091	20.3596	20.7903	19.5267	25.0684	17.4717	21.8594	15.7989	13.1509	11.8257	21.0388	20.8314	16.9283
VIT_02s0025g01420	Preprotein translocase YidC subunit	14.1767	13.244	11.5853	14.2373	16.9146	14.2016	40.1171	34.1482	35.3794	15.1447	13.9215	15.4938	15.7291	16.1633	13.2202	39.8696	41.3756	39.6805	15.5588	14.7815	12.3107	15.8311	15.5181	14.8985	38.474	40.4207	26.778
VIT_06s0004g04460	ALB3 (ALBINO 3)	65.5042	70.8882	97.4976	107.816	94.3651	109.565	98.0495	89.4794	81.2035	67.8313	63.0116	87.801	114.697	100.873	107.674	87.7956	83.1496	76.4769	66.2857	72.5972	101.956	121.413	101.572	109.307	99.0436	83.8404	80.163
VIT_00s0391g00060	Preprotein translocase subunit SecG	11.9239	10.6429	13.9755	14.6819	17.0761	13.9822	21.7562	19.8422	22.8341	13.1649	12.3442	13.7302	18.0481	20.1145	14.0367	22.0759	21.5044	27.855	14.6644	9.36344	13.065	18.727	15.8979	16.9787	22.678	20.918	21.2736
VIT_01s0010g02370	Signal recognition particle subunit 72 SRP72	26.1281	24.6647	25.7226	33.4189	35.9506	30.6015	57.2439	49.03	51.2522	24.1816	25.7024	27.2838	32.2846	33.2871	34.2607	60.2668	50.8621	49.8148	26.3811	26.8576	25.5439	31.2118	35.145	31.6958	56.3664	50.8143	50.9215
VIT_01s0127g00270	Signal recognition particle receptor beta subunit	19.6135	19.3066	12.5793	36.5195	33.4036	31.4029	54.4145	46.5545	47.5452	24.3111	20.9598	15.2638	37.8555	38.0718	33.8161	61.2559	50.5122	46.5981	17.8548	19.0976	12.0346	34.912	34.3128	35.2602	55.0321	50.75	42.4157
VIT_05s0020g00020	Signal recognition particle subunit 19 SRP19	33.9521	35.6941	29.722	34.6955	36.6213	32.2337	37.1452	43.9168	34.5871	32.9103	32.6614	34.1243	33.2817	29.4419	30.8131	38.5805	37.6513	29.0295	30.9352	34.4978	31.0243	31.9635	36.1487	37.0369	39.2824	36.1951	38.7018
VIT_05s0020g00570	Signal recognition particle subunit 19 SRP19	21.2491	20.3369	16.8057	16.9063	21.7729	17.9883	26.4739	30.2291	24.7236	18.4931	19.0262	19.206	18.7402	15.3507	19.0794	27.4312	28.0035	17.7279	19.7727	25.2354	17.5826	14.4337	22.6598	17.909	27.5457	27.2012	26.8886
VIT_05s0094g00400	Signal recognition particle subunit 14 SRP14	57.9557	50.7087	54.7615	79.404	70.32	76.1067	107.216	91.998	88.2747	55.5052	41.1575	56.7011	80.0398	69.2443	77.1608	107.949	88.0705	96.21	53.0538	47.785	59.8273	76.8455	70.6002	77.9695	100.892	91.1122	75.2944
VIT_07s0141g00660	Signal recognition particle subunit 9 SRP9	26.0366	21.4846	24.338	23.5995	21.75	23.6529	16.4956	13.2377	15.5221	22.0444	16.745	22.4248	23.4885	21.1043	25.7964	16.427	16.5073	15.6981	27.4012	22.7583	22.8233	21.1859	22.2499	23.0719	14.9601	13.3529	15.6481
VIT_08s0007g02180	Signal peptidase I	17.0968	18.3026	11.484	7.22499	6.64447	7.13016	5.79625	6.84955	7.7964	16.6945	16.8388	15.9099	7.04787	7.24006	5.84836	5.16048	6.87802	7.60708	18.743	18.3492	11.3125	7.23187	7.15726	8.37228	5.86028	6.08701	7.66176
VIT_09s0002g07290	Signal recognition particle subunit 54 SRP54	38.7711	40.4292	35.4554	58.5992	52.3718	51.7508	78.0086	76.7798	83.0527	38.6523	41.8468	39.8563	49.7449	60.9186	53.8019	76.638	71.8233	90.4867	36.8316	43.5672	36.013	60.0466	50.296	49.4064	75.7847	79.0038	69.7602
VIT_10s0003g02990	Signal peptidase I	15.7618	16.4952	14.2723	13.3898	23.2602	16.7368	22.4721	28.4436	26.2205	13.6774	17.7895	16.2921	17.1674	13.3985	19.164	23.1734	22.2797	21.0716	14.2082	23.4785	11.4743	11.8057	18.4477	18.8653	26.4172	27.265	29.6433
VIT_11s0016g03820	Signal peptidase I	8.60696	6.53914	12.6914	10.4183	8.01822	9.4118	5.28791	4.32399	5.54985	8.68043	4.99611	12.0799	11.042	8.40245	7.97114	5.67977	4.37516	6.07854	9.50083	5.3382	13.7681	9.7169	7.09371	10.1561	4.50834	4.47945	5.19713
VIT_11s0037g00300	Signal recognition particle receptor alpha subunit	108.518	86.1521	104.877	121.006	121.685	102.001	159.909	146.238	148.402	73.7913	83.9224	97.1995	115.842	135.968	124.172	167.119	159.827	170.283	115.657	83.7958	102.863	122.708	122.709	101.486	164.157	179.082	148.886
VIT_17s0000g00300	Signal recognition particle subunit 68 SRP68	43.2316	43.2784	26.2506	37.4763	39.4391	35.3754	39.4047	34.3452	33.8067	41.6164	43.3878	33.8605	38.9625	38.3632	33.9318	38.8234	33.095	30.8037	41.7958	48.8442	27.8769	40.5655	39.9532	36.7928	39.0332	34.0287	33.6748
VIT_17s0000g08600	Signal recognition particle receptor beta subunit	7.61661	7.77433	14.4177	6.68389	5.70403	9.93504	6.06964	6.53661	6.26505	6.29536	8.68094	11.7244	6.63348	5.69433	9.03313	6.57673	6.38022	5.45035	8.14994	7.75707	12.6686	6.60125	6.96682	10.1669	5.91923	5.82518	5.63228
VIT_18s0001g02030	Signal peptidase 1	3.73635	4.89386	4.74232	1.75424	2.44635	2.5877	4.31439	4.45147	2.90298	3.69438	4.80729	4.04146	1.88531	2.03891	3.183	3.61528	4.83515	2.86163	5.62911	5.20912	5.37123	1.84113	2.55497	3.10276	3.52621	5.72103	4.19356
VIT_18s0001g11290	Signal peptidase 1	63.0124	62.9719	95.7918	55.3964	55.4151	48.4434	48.6643	53.0014	40.2477	51.7356	62.5537	76.4095	49.5976	46.0939	44.8263	42.8101	54.6423	39.7022	81.5459	55.9029	97.4949	49.5061	47.4282	45.4646	40.0197	55.2995	43.3733
VIT_19s0014g00120	Signal peptidase I	8.33397	9.84752	9.3618	8.00614	9.2422	8.87306	9.00047	8.2755	10.3025	9.36404	10.0208	11.067	9.7405	9.94919	8.14163	8.48869	8.76432	11.6712	8.63363	10.1381	9.1021	8.20624	9.23774	8.42309	7.69407	7.55509	11.0325
VIT_00s0265g00070	Ubiquitin-conjugating enzyme E2 O	13.5538	6.50235	21.155	37.4888	10.7579	35.0506	47.5651	13.5749	27.2764	15.686	11.0765	20.0978	28.1476	21.616	36.0991	33.9953	18.9546	22.5779	8.86346	7.88804	15.7526	24.0469	15.845	26.6034	31.2362	12.9711	25.2166
VIT_00s0375g00010	COP1-interacting protein 7	38.6568	45.8008	61.5691	25.776	33.5249	30.306	8.90282	10.9325	8.88443	33.0592	38.7064	57.4558	26.1124	19.168	37.6693	7.39564	9.666	5.68734	39.3931	49.3344	58.8081	18.2619	29.5953	31.8586	8.16876	8.01298	10.9118
VIT_00s0663g00030	Seven in absentia (SINA) family	0.370982	0.480125	0.357222	0.120078	0.126671	0.214556	0.677841	0.68654	0.875562	0.630004	0.479718	0.200438	0.23546	0.256778	0.341566	0.782493	0.699619	0.596677	0.341643	0.416071	0.332799	0.179321	0.479878	0.220838	0.862289	0.389056	0.559278
VIT_00s1306g00010	COP1-interacting protein 7	80.2586	84.0804	112.587	61.082	53.3717	85.9868	18.2827	23.1437	20.0786	68.3927	74.8508	99.9718	50.5985	57.8233	94.557	19.0959	20.7441	23.3892	68.5366	84.397	111.99	52.751	47.2316	82.6327	15.76	15.1755	23.2975
VIT_00s1927g00020	Ubiquitin-conjugating enzyme E2 O	1.87669	0.777795	2.92851	4.79402	1.7451	4.31541	7.17704	2.48396	3.84991	2.06709	1.64415	2.86814	3.12472	2.8943	4.971	5.13654	2.88153	3.10752	1.2834	1.40483	1.94192	2.49022	2.02622	3.3688	5.45097	1.90523	3.64119
VIT_01s0026g01770	Ubiquitin-conjugating enzyme E2 A	758.112	795.654	822.714	628.81	593.729	674.013	341.874	427.545	435.28	715.881	755.092	792.59	536.925	563.464	545.361	344.383	307.449	435.739	732.262	858.518	866.637	695.739	517.968	726.702	372.708	306.991	413.234
VIT_01s0026g02230	Cullin 3a	17.8054	15.4823	23.9088	31.2168	26.9856	27.5054	44.042	34.2924	33.2263	17.6713	15.4524	22.6573	26.0967	28.557	31.4829	40.7858	35.1026	33.6351	17.3153	14.3449	25.2615	27.5824	25.4873	27.5155	44.4327	37.2512	30.5358
VIT_01s0137g00190	CIP4 (COP1-interacting protein 4)	7.03585	7.50784	5.97733	5.21951	4.11123	3.97082	6.73176	5.05566	4.97768	7.15404	7.93509	7.73951	4.68245	4.39474	5.33475	6.61439	5.06785	5.90693	6.77695	5.93141	6.00492	4.4727	4.26329	4.87328	6.27414	5.71229	5.2937
VIT_02s0025g00070	Ubiquitin-conjugating enzyme E2 H	46.1487	41.2341	43.3675	37.1069	44.2181	38.6558	103.806	111.559	75.117	41.1698	38.6717	45.9125	41.659	44.2336	33.818	93.0963	101.531	63.2623	43.8668	49.3042	40.9587	41.7129	41.7002	35.9724	105.882	109.39	59.8563
VIT_02s0025g01170	COP1-interactive protein 1 / CIP1	13.2842	12.4578	26.4691	11.9267	8.74241	13.2303	2.57428	6.52219	7.96866	13.1938	11.2896	19.8785	10.0036	11.0022	12.5222	2.74195	6.9387	9.50003	11.895	11.2179	24.5674	10.2022	8.36498	12.9044	2.54431	8.116	7.7883
VIT_02s0025g01660	Seven in absentia SINA5	24.0001	22.8549	34.4378	25.6068	28.6693	30.1643	31.3672	20.1147	17.7798	21.3395	21.4508	30.4013	29.4713	24.1298	30.5384	29.3533	19.9391	17.1251	20.9199	24.0311	34.2934	25.4098	26.6694	31.1407	27.6843	17.1042	18.1078
VIT_02s0025g02760	Ubiquitin thiolesterase 4	33.4791	32.1224	29.4944	46.4878	45.1346	37.9574	71.5603	66.6071	78.4426	33.3047	33.4004	30.8631	44.1099	49.6645	43.3191	73.4045	70.3021	77.0502	31.7666	33.3524	30.6953	51.4163	43.813	37.7227	73.5636	76.6895	64.4683
VIT_03s0017g00760	E3 ubiquitin-protein ligase HUWE1	0.121016	0.278602	0.102736	0.0726366	0.147799	0.10602	0.297716	0.356282	0.465029	0.147112	0.249794	0.0863351	0.0724806	0.0740582	0.106368	0.610745	0.375767	0.603517	0.0707697	0.207049	0.0383378	0.0522317	0.0952789	0.117991	0.449311	0.490838	0.336461
VIT_03s0017g01690	CIP1 (COP1-interacting protein 4)	96.5409	94.0272	64.0266	144.939	140.459	124.867	110.167	120.152	128.239	82.3556	93.7054	72.5232	112.179	158.215	142.197	102.661	111.341	128.224	79.2147	99.0305	60.9378	147.134	140.285	127.818	107.015	122.871	114.619
VIT_03s0038g02340	HECT ubiquitin-protein ligase 3 (KAKTUS protein)	44.358	41.5351	50.1693	79.5392	83.3882	76.7144	152.008	125.473	123.558	44.2624	46.1709	52.2617	78.1365	78.5331	81.4692	139.919	127.114	101.562	47.4958	43.4996	49.2424	80.1016	86.3482	71.7796	155.476	144.628	104.59
VIT_03s0038g02570	Ubiquitin-conjugating enzyme E2 O	25.2154	25.6921	22.0031	26.787	27.3744	24.3313	46.0223	45.6649	47.0711	23.6476	26.4252	23.8951	25.78	28.4828	25.4137	43.9584	46.5003	43.9484	24.5257	25.5296	21.7879	31.6166	26.9262	21.8938	47.0653	49.5136	41.1971
VIT_04s0023g02620	Ubiquitin-conjugating enzyme E2 W	106.051	112.599	90.5893	59.0067	64.6549	58.2461	85.9105	79.8012	77.1463	110.204	102.088	100.85	59.8832	60.9917	56.1526	89.4985	74.7371	74.3314	95.8563	120.988	88.9458	60.273	61.0105	56.2618	83.1312	78.1276	67.2217
VIT_04s0023g03830	HECT ubiquitin-protein ligase 3 (KAKTUS protein)	25.082	22.3611	34.7784	66.7666	58.1731	64.1452	73.1462	62.368	58.2522	26.1083	24.3454	31.9905	63.6222	62.4045	61.6031	73.9083	65.4842	50.7823	23.6462	21.7148	33.9924	64.7897	66.8478	60.3479	67.054	65.8778	45.761
VIT_05s0020g00320	Ubiquitin-protein ligase E3 C	0.728722	0.843171	0.724314	0.722288	0.602773	0.628927	0.831124	0.57938	0.988308	0.958057	0.942703	0.760291	0.544878	0.738433	0.663359	0.650872	1.12609	0.77769	0.478203	1.06404	0.510852	0.580312	0.368282	0.585429	0.784879	0.770811	0.938022
VIT_05s0049g01280	COP1-interacting protein 7	42.2495	54.5816	31.886	23.0955	21.2133	30.9405	15.1926	16.2608	17.4072	51.479	51.6538	36.5445	21.7227	28.1773	24.8328	16.425	17.3012	21.4244	35.9226	55.2228	35.0743	26.3679	21.7214	29.0144	15.5866	18.16	16.6383
VIT_05s0077g00850	Ubiquitin-conjugating enzyme E2 O	18.0408	21.693	11.0555	17.4049	20.6735	11.2295	68.1627	61.6892	50.1727	17.6327	18.8721	14.7258	16.5498	19.0628	13.4424	66.1529	58.4857	45.8253	16.0582	22.5635	12.5409	19.9697	17.882	9.94121	72.996	63.461	39.6634
VIT_06s0004g01130	Seven in absentia SINA2	14.498	12.2301	16.5377	120.667	125.161	78.8886	15.0347	26.8946	31.7968	10.5994	13.1978	12.4575	127.296	145.592	81.2029	18.9593	20.3329	41.0179	13.5319	13.6826	11.8998	163.305	136.695	87.3593	16.0503	14.8074	43.9242
VIT_06s0004g07060	Ubiquitin activating enzyme E1	101.781	83.0215	104.86	179.051	179.959	156.305	287.782	232.572	246.69	83.3663	79.8705	104.879	170.548	174.064	169.749	282.884	254.781	236.096	104.201	80.8127	105.277	165.695	180.054	152.109	269.353	274.732	220.216
VIT_06s0061g00070	Ubiquitin-conjugating enzyme E2 C	0.0993141	0.367663	0.21251	0.183244	0.293956	0.186306	0.355041	0.195973	0.322044	1.58926	0.69814	0.438408	0.139874	0.091503	0.142224	0.167787	0.290867	0.216107	0.861378	0.362191	0.20109	0.128383	0.0564112	0.220879	0.297287	0.287663	0.206305
VIT_08s0007g06740	Seven in absentia SINA2	17.4332	15.8941	25.4401	20.1861	21.536	16.7225	11.1484	15.8637	12.9535	15.5842	15.641	20.0167	22.24	24.4224	15.6846	10.8323	13.3202	13.9457	18.063	15.6204	25.2492	24.0502	19.2552	19.22	9.81057	14.074	13.2557
VIT_08s0032g00310	Ubiquitin-conjugating enzyme E2 A	249.045	245.49	235.642	199.614	193.152	184.721	206.92	231.812	147.959	201.696	237.94	236.474	164.38	161.879	156.717	166.59	154.429	114.842	202.807	297.868	230.435	178.953	181.481	193.14	203.371	189.097	133.989
VIT_08s0040g00460	Ubiquitin-conjugating enzyme E2 S	65.6309	65.8052	61.0878	30.6623	24.618	28.6557	11.8127	10.9348	12.0662	61.0322	60.6476	56.1971	32.4607	28.139	22.3676	14.1734	12.1241	12.5033	64.6077	57.9426	64.5177	36.6421	23.922	31.015	12.0943	12.3813	9.78841
VIT_08s0040g03270	E3 ubiquitin-protein ligase TRIP12	10.7629	9.59905	13.5732	34.7201	36.0598	30.9046	64.7484	56.8161	56.9071	12.4991	11.4745	15.4818	34.9042	34.5782	30.5062	61.9785	57.1158	42.9344	10.1325	9.48788	13.5408	37.3283	40.5762	26.4419	61.0716	69.9356	45.3954
VIT_08s0058g00320	Ubiquitin activating enzyme E1	31.4623	25.3957	28.2286	32.089	31.6843	26.5591	38.2693	35.9149	34.2681	30.1755	23.6787	29.5247	25.9616	27.1217	24.4276	34.2323	38.0028	32.4387	28.3134	22.5067	27.239	28.4881	27.715	23.8195	34.2951	35.4597	33.1269
VIT_09s0002g00740	COP1-interacting protein	20.0595	19.3897	19.6103	35.1766	34.3763	29.1302	14.8556	15.4252	14.2489	18.7302	20.2584	20.5658	36.0795	33.7237	27.5778	14.4124	14.6366	13.5953	19.0133	20.7529	20.3144	33.1719	33.992	28.0279	12.8495	13.2093	14.1995
VIT_09s0096g00990	E3 ubiquitin-protein ligase HUWE1	0.335493	0.630781	0.326115	0.220536	0.294019	0.226017	1.37774	0.694923	0.966005	0.433356	0.487678	0.299686	0.162512	0.463828	0.453463	1.16977	1.0335	1.2158	0.278067	0.287899	0.272995	0.0877823	0.278792	0.284669	1.06036	1.02636	1.09867
VIT_10s0523g00030	Photoregulatory zinc-finger protein COP1	10.5036	11.8383	17.2602	14.0147	12.2254	16.2723	12.5454	12.2505	13.3719	11.6179	12.0561	13.4964	17.1519	17.2735	17.1669	13.33	13.1326	15.3388	11.7435	11.5223	16.0352	15.6673	13.8108	15.182	12.3884	14.7076	11.9516
VIT_12s0028g02220	Ubiquitin-conjugating enzyme E2 N	86.2471	91.3899	81.0534	78.9472	76.5761	78.7302	66.7564	58.104	54.4229	78.0149	77.4884	82.0477	71.3818	71.521	73.2944	65.7371	54.5739	50.814	83.4714	93.3246	88.0228	80.8262	72.7729	89.7182	59.032	52.8484	55.1558
VIT_12s0028g03630	Ubiquitin-conjugating enzyme E2 O	45.3351	44.2655	43.3894	64.1854	59.9838	60.2789	58.7682	52.971	47.3752	47.0835	40.9453	43.8316	60.4681	62.4055	49.8368	58.2501	50.8212	41.9258	36.8018	41.8981	42.3534	68.95	60.6094	56.8247	56.0032	50.8678	39.8971
VIT_12s0059g01420	Photoregulatory zinc-finger protein COP1	10.943	11.7911	16.1713	11.7355	9.872	13.997	24.9167	20.2913	20.0935	10.6109	12.0511	16.3144	11.236	12.8829	12.3834	22.7818	19.5265	21.1006	10.2257	12.5821	17.0618	12.5089	10.8548	12.3974	22.5199	20.1292	16.5882
VIT_13s0019g04090	Ubiquitin-conjugating enzyme E2 C	51.0305	46.3959	63.5202	41.07	37.7992	53.3309	40.6321	38.953	37.2855	47.9057	43.174	54.3029	39.3046	40.6755	43.3366	37.0998	38.9613	35.8071	42.1514	34.6796	72.0122	45.7018	44.8193	50.834	42.3951	38.927	38.0447
VIT_13s0067g00080	COP1-interacting protein 7	19.5344	20.6214	29.0379	16.0305	12.5028	16.2202	4.28287	6.26108	6.60236	21.3809	21.6676	26.1613	15.5525	16.1021	16.0341	4.54691	5.76435	7.72359	20.327	19.2005	30.6028	15.523	14.0208	16.8696	4.27589	5.52961	6.82514
VIT_13s0139g00150	Seven in absentia SINA3	20.3108	18.3308	22.247	30.4506	30.8009	20.9194	19.475	27.0324	20.3527	20.9963	18.4868	21.5824	31.6135	33.7118	19.7147	20.7747	27.2234	20.0803	21.1018	19.8237	23.5374	35.3662	30.8971	24.9581	20.1953	26.9785	17.9033
VIT_14s0006g01870	E3 ubiquitin-protein ligase SIAH2	7.09524	6.57613	5.46574	12.621	12.2768	10.9178	14.3839	13.5198	14.7817	7.60271	6.44873	7.35889	12.0607	13.3767	10.5282	16.4388	14.243	14.8633	6.64125	6.48095	5.86623	14.5253	11.5041	9.87528	16.1416	15.6272	9.79463
VIT_14s0108g00140	Ubiquitin-conjugating enzyme E2 A	189.796	185.082	238.99	477.083	463.469	493.392	509.955	404.121	360.622	182.876	194.734	224.172	436.762	442.074	446.432	487.46	341.763	337.637	183.711	230.235	238.017	449.666	471.361	466.051	445.124	344.505	325.008
VIT_14s0108g00490	Cullin 3a	49.3166	51.8338	43.4859	90.8374	80.8332	62.4379	71.6119	74.1558	71.204	48.5441	57.9729	51.1738	79.3189	89.2856	59.8627	67.1166	65.6162	70.8053	41.0425	59.6986	46.3274	113.762	79.8714	63.3005	70.7026	71.644	62.7501
VIT_15s0046g00380	Seven in absentia (SINA) family protein	0.653729	0.451355	0.523168	0.230094	0.326654	0.311288	0.170764	0.385723	0.331024	0.703412	0.551816	0.529728	0.297191	0.394381	0.128667	0.545607	0.426685	0.181444	0.567367	0.433736	0.663956	0.263266	0.298108	0.374624	0.544523	0.341531	0.298596
VIT_15s0046g00390	Seven in absentia SINA4	3.04369	3.40867	3.32162	1.85552	1.68549	2.13682	1.4945	1.48958	1.65834	3.44962	3.33403	3.34267	1.83201	1.77524	2.2662	1.20271	1.61223	1.91152	2.57056	3.29634	3.62911	1.48128	1.6337	2.00859	1.61616	1.0451	1.45253
VIT_15s0046g00410	Seven in absentia SINA1p	3.19907	2.55226	1.97716	0.713092	0.847023	1.14954	0.31483	0.486316	1.32388	2.55835	2.01638	3.49749	1.46534	0.75588	1.24827	0.24988	0.412999	0.935205	2.70242	3.94812	3.01603	0.970036	1.19107	0.684303	0.200562	0.487033	0.891007
VIT_15s0046g02280	Ubiquitin-conjugating enzyme E2 H	49.3485	57.2488	45.3968	54.0971	48.549	59.4584	57.8068	61.0446	61.4143	57.2873	54.8824	46.8828	51.7925	57.2299	49.5935	54.8611	53.3489	63.1609	42.4103	64.343	44.0151	64.9273	47.5237	52.0037	56.7567	58.0025	53.5453
VIT_15s0048g02140	DET1 (de-etiolated 1)	17.6143	19.5885	24.4799	17.7037	16.8513	21.5499	18.0191	14.7613	14.6994	18.0231	19.5787	21.9348	18.1103	20.3932	22.7554	16.572	14.5649	15.8678	17.9241	14.5683	23.7294	18.8896	18.9315	21.1925	17.4114	15.4488	15.4972
VIT_16s0098g01850	Seven in absentia SINA1	30.0666	30.5523	22.375	37.0673	40.264	33.5968	30.9706	30.1274	25.278	31.2587	29.7421	25.4761	35.6453	36.0477	37.9911	28.5956	24.7455	24.07	25.5037	35.3523	21.5997	36.3839	36.6495	34.5824	29.0822	25.017	26.4521
VIT_17s0000g00610	Ubiquitin-conjugating enzyme 26 UBC27	56.1481	55.4463	61.1039	55.7313	53.2892	60.6061	55.1819	44.0522	45.152	53.7006	48.7233	56.6033	59.7026	54.0677	55.2771	50.0621	42.576	40.5681	47.7916	59.3382	60.4737	57.3916	56.1934	65.0736	50.3274	42.8978	43.019
VIT_17s0000g01380	Ubiquitin-activating enzyme E1 domain-containing protein 1	24.9747	20.2212	27.5151	30.2398	32.8848	31.3865	28.4042	30.1935	28.1978	24.8392	20.6718	24.015	31.3584	32.7559	33.4953	27.5116	29.1594	25.2644	27.0891	16.7516	30.1145	31.2379	35.363	33.8617	26.2791	28.0777	24.9379
VIT_17s0000g03470	STAM-binding protein	21.0305	29.0422	26.5726	36.399	40.2222	54.2153	42.9724	25.0371	21.4745	26.6759	25.9357	20.2483	51.2806	28.6281	37.5102	26.2416	26.8332	20.6207	18.6202	28.8541	11.7604	28.0333	39.6651	33.5273	48.1622	28.8803	31.6327
VIT_17s0000g05820	Ubiquitin-conjugating enzyme E2 A	176.368	202.899	171.174	90.9264	103.752	100.734	63.1674	48.1477	39.821	161.1	197.224	186.793	94.9135	68.5964	68.9158	59.9341	36.712	34.3573	156.803	243.847	189.761	121.706	85.5129	109.08	60.8733	36.0767	39.2116
VIT_17s0000g07960	Ubiquitin-conjugating enzyme E2 H	38.0734	27.8039	39.0225	65.5358	53.1636	61.6529	49.4358	51.5186	55.1979	29.941	20.7963	33.7869	65.714	60.3012	56.3991	54.8409	51.3453	48.22	36.3678	17.0813	43.0101	62.1844	69.6308	61.4422	51.6524	56.7083	55.627
VIT_18s0001g07370	Ubiquitin carboxyl-terminal hydrolase 16	20.3179	16.7473	21.0105	28.0562	28.6952	23.4615	17.4867	17.8561	13.689	16.7689	15.1608	18.226	27.2977	26.5843	25.919	18.9828	18.0786	12.998	20.3104	15.6257	21.6261	26.7279	26.5398	24.7236	19.2242	16.7462	12.6252
VIT_18s0001g13180	Ubiquitin-conjugating enzyme E2 W	59.3023	59.6046	59.8262	79.6997	81.976	69.3262	47.2742	60.3563	57.8066	53.5677	59.8327	70.9148	69.6348	77.0299	56.8758	45.7757	50.1277	59.9779	60.6318	71.6038	62.6271	87.4131	74.3664	72.9022	46.2399	55.455	59.0051
VIT_18s0001g14530	Ubiquitin-protein ligase CIP8 (COP1-interacting protein 8)	82.9258	73.0026	103.34	94.9492	110.909	101.641	97.1068	89.7224	80.3758	66.1578	70.8421	110.672	96.2155	91.8878	106.144	93.9269	80.5384	64.5343	78.4885	94.3927	107.655	81.9424	107.814	91.5147	82.4327	82.0537	74.122
VIT_18s0001g15010	F-box and leucine-rich repeat protein 1	59.3411	68.6893	67.0499	76.8508	87.3236	81.8987	130.847	140.211	140.519	68.4706	68.4321	73.9125	83.1938	86.3744	71.9331	134.2	125.739	139.433	55.4914	72.3922	60.3354	95.886	92.348	74.373	140.998	154.627	114.568
VIT_19s0014g01460	Ubiquitin-conjugating enzyme E2 N	145.861	158.421	129.241	141.411	141.674	139.706	99.8271	136.676	143.329	154.692	158.564	127.819	141.513	142.751	135.916	104.057	116.249	134.421	147.288	169.023	131.075	143.478	152.412	158.399	99.9569	126.039	139.498
VIT_19s0014g02760	Ubiquitin-conjugating enzyme E2 O	26.593	26.6633	22.0251	44.5227	42.5239	40.1591	59.8795	48.3501	45.1648	29.9456	32.0049	26.8358	42.7745	46.3123	41.1161	56.0598	47.6921	43.0555	26.4093	26.7087	22.4717	48.4211	43.1504	39.7392	55.9833	47.8268	40.1442
VIT_19s0014g03200	COP1-interacting protein 7	22.7695	29.6584	21.9667	4.35231	3.66242	6.84276	3.95382	2.48722	2.77994	28.3806	29.4592	24.8461	5.31467	4.65073	6.82273	3.9834	2.70897	3.10037	22.3248	28.8596	22.8244	4.84687	3.89827	7.4018	4.10691	2.38241	3.17937
VIT_19s0014g03210	COP1-interacting protein 7	14.6872	17.712	16.2768	2.4866	2.9622	3.86016	2.23869	0.934788	1.39028	17.825	18.7754	17.4623	2.79802	2.11745	3.38585	2.48423	0.869416	1.39109	13.581	21.499	15.5854	2.03428	2.80747	3.83658	2.50982	1.77691	1.7298
VIT_19s0015g00660	E3 ubiquitin-protein ligase HUWE1	5.10291	5.40541	3.10145	0.985696	1.24397	1.12495	0.115117	0.421282	0.401443	5.12027	5.79097	4.3602	0.883038	1.19504	0.5708	0.192842	0.288738	0.554908	3.94946	5.63952	3.22836	1.17818	1.27537	1.07684	0.13941	0.262533	0.484077
VIT_19s0015g00670	E3 ubiquitin-protein ligase HUWE1	26.1668	22.6736	42.2191	52.8887	51.6062	52.523	58.1938	52.7986	50.3089	24.8509	23.6096	38.2527	49.2207	50.4548	41.9718	52.9799	53.7261	36.9196	24.1575	22.9316	39.4263	50.6747	56.7433	51.1884	57.7885	61.4181	41.7266
VIT_00s0642g00010	E3 ubiquitin-protein ligase CHIP	0.635271	0.453832	0.452488	0.381325	0.403622	0.358361	0.819742	0.48985	0.455385	0.726725	0.496614	0.531399	0.382162	0.231146	0.515842	0.581356	0.386557	0.229557	0.539455	0.292799	0.678415	0.31166	0.274607	0.311483	0.608801	0.597348	0.457432
VIT_00s0669g00010	E3 ubiquitin-protein ligase CHIP	11.3095	8.59319	9.90406	4.94792	5.54687	5.88977	9.02883	6.9586	5.6403	10.5304	6.84825	9.88755	6.44704	3.61544	4.47236	8.27075	5.29467	3.17733	11.242	6.35237	10.311	5.14437	6.92574	5.18838	7.33729	6.53534	6.16088
VIT_00s0757g00010	E3 ubiquitin-protein ligase CHIP	29.6034	21.0234	20.4588	16.0231	13.4114	9.13242	18.0568	14.4478	14.7935	29.5415	15.4652	21.054	16.3001	14.8621	12.0935	15.7879	9.27633	15.4501	19.4115	23.24	28.7953	18.2278	14.9891	13.686	9.52967	10.7606	8.05686
VIT_00s1034g00010	E3 ubiquitin-protein ligase CHIP	20.3559	19.1318	18.4391	11.3862	12.1054	14.5022	11.7394	11.3315	10.8524	21.487	13.5776	19.3751	12.7207	11.8727	8.47513	13.4149	9.88303	11.0375	19.9506	17.2276	16.9273	11.6535	10.1672	12.7682	10.9301	9.54352	10.4968
VIT_02s0025g01050	Ubiquitin-conjugating enzyme E2 D/E	1345.29	1375.85	1482.06	525.699	624.161	549.497	209.256	325.826	289.378	1254.81	1368.79	1571.2	505.438	373.458	502.957	194.791	216.199	192.766	1305.74	1556.32	1652.03	480.75	513.303	626.996	232.022	218.254	367.374
VIT_03s0038g02390	Ubiquitin-conjugating enzyme E2 D/E UBC28	25.5833	31.5523	39.7731	12.6916	14.3023	14.4956	20.574	15.8939	16.5529	17.7291	34.6849	22.3268	11.5904	11.2299	14.1076	22.1162	16.8944	15.6812	19.9169	30.6722	32.1984	11.7257	14.1385	13.3618	19.8583	17.9358	14.593
VIT_05s0077g01100	Ubiquitin-conjugating enzyme E2 J1	137.942	129.217	116.903	331.659	368.974	287.442	372.28	397.666	371.539	119.632	123.675	119.072	294.423	297.111	283.154	367.442	357.262	339.304	124.461	166.644	117.624	311.403	352.809	265.211	367.404	379.081	356.786
VIT_06s0004g00730	Ubiquitin-conjugating enzyme E2 D/E	3.91045	3.17017	3.64382	2.8344	3.10759	3.36865	1.09611	1.07362	2.01972	4.63622	3.86482	3.45645	3.13253	1.98107	2.34351	0.970403	1.34977	1.56112	3.3455	3.88502	4.43793	2.93071	2.11486	3.33141	0.88169	1.0933	2.03474
VIT_06s0004g04430	Ubiquitin-conjugating enzyme E2 G1	83.9767	93.4151	85.0581	32.8909	29.6508	34.4913	22.8934	28.7515	33.3487	75.3314	81.7345	81.9107	34.2587	30.1507	42.0511	24.1484	26.5117	30.338	77.9684	102.737	86.5114	28.4622	39.926	35.0406	23.6199	31.2966	34.759
VIT_06s0004g08200	Ubiquitin-conjugating enzyme E2 D/E	440.662	526.499	146.486	167.197	269.182	122.286	110.058	180.139	155.471	460.656	524.771	341.772	189.265	208.189	109.651	106.402	123.4	115.147	470.122	491.371	178.242	244.324	224.441	122.935	120.52	150.581	186.833
VIT_08s0007g00120	Ubiquitin-conjugating enzyme 13 (UBC13), E2	934.284	889.306	1045	886.753	1089.81	926.293	225.911	447.273	369.534	698.25	760.96	969.867	723.373	642.45	681.918	198.867	251.027	279.646	833.249	1085.89	1092.17	916.048	800.369	1003.61	255.222	236.642	457.612
VIT_08s0040g00040	Ubiquitin-conjugating enzyme E2 D/E	655.207	715.44	646.363	751.12	781.531	608.197	806.523	903.464	802.271	613.431	688.212	667.511	621.483	613.461	546.333	768.98	717.097	769.081	598.586	804.602	659.949	741.146	642.646	610.713	843.073	716.849	718.528
VIT_09s0002g00280	Ubiquitin-conjugating enzyme E2 J2	58.3628	60.1446	56.8844	85.7293	73.5334	85.003	100.412	86.778	85.778	66.3777	50.4618	63.5765	89.9279	79.5103	87.7316	103.849	88.8252	85.9294	63.8834	60.7739	75.8107	87.6467	85.9153	83.3197	97.6551	90.8924	73.6191
VIT_13s0019g00910	Ubiquitin-conjugating enzyme 13 (UBC13), E2	50.59	49.3457	51.9625	43.9191	45.5532	48.0895	68.6454	69.1158	63.9585	44.7352	46.021	51.4036	43.549	37.4929	48.247	68.9936	60.454	55.5944	48.1539	58.8623	47.3455	42.3253	41.7448	50.2777	64.0839	70.0851	55.4367
VIT_14s0108g01390	Ubiquitin conjugation factor E4 B	31.6123	33.5269	40.1302	51.0543	47.7119	52.8387	74.125	63.8109	64.6087	32.4672	35.9782	39.6003	49.5152	47.9684	55.8951	69.8728	65.2754	59.4688	30.6372	33.5161	40.0939	48.0476	53.3913	52.1145	71.0917	68.192	53.6415
VIT_15s0046g01400	Ubiquitin-conjugating enzyme E2 D/E	451.991	486.843	483.212	265.565	284.573	284.688	151.409	141.664	145.47	443.044	450.274	449.373	271.815	248.076	250.134	143.616	113.475	152.786	429.122	580.207	476.392	304.981	233.059	285.449	152.005	105.871	167.462
VIT_16s0039g02200	E3 ubiquitin-protein ligase synoviolin	28.0464	24.3583	25.82	42.8554	44.4228	39.6962	58.3127	52.5802	47.5873	29.8433	26.2285	26.5181	47.0621	43.9737	40.0039	58.255	50.0455	40.4313	29.5053	22.5388	25.3982	46.7329	46.9879	41.2072	60.4092	49.6364	43.3072
VIT_16s0050g02410	Ubiquitin-conjugating enzyme E2 D/E	548.229	448.802	611.862	549.907	497.538	503.985	440.782	453.236	471.277	426.559	357.296	518.471	505.87	500.822	518.61	464.207	450.168	534.698	511.728	406.55	637.66	519.046	487.155	504.312	409.639	464.376	429.893
VIT_19s0015g01190	Ubiquitin-conjugating enzyme E2 D/E	285.859	299.969	286.876	332.152	339.095	298.493	341.176	379.271	381.986	253.21	288.415	285.461	304.754	284.052	273.448	327.399	334.79	395.566	263.911	399.679	296.411	320.288	321.845	273.271	341.439	351.942	359.363
VIT_00s0349g00030	Skp1	0.967693	0.744903	0.922311	0.915505	1.03274	1.0733	0.521758	0.630191	0.647754	0.956657	0.815017	0.942611	1.01353	0.619655	0.937824	0.481007	0.578932	0.311787	0.894143	0.650932	0.843379	0.689373	1.26817	1.07134	0.443321	0.54999	0.751081
VIT_03s0038g02480	SKP1	8.19228	7.9555	5.09956	3.16742	3.46935	2.60978	1.72813	2.01607	3.1024	10.3608	9.6564	6.0685	3.21945	3.96775	3.00691	1.96402	2.66882	3.43042	9.75876	8.37479	4.76441	2.74225	3.89589	3.38509	2.18586	3.04163	3.82488
VIT_03s0038g02490	SKP1	4.2537	3.32541	3.87018	3.16307	3.79257	1.96596	6.44361	6.54284	5.92514	4.47444	6.19068	4.56182	2.71076	2.59248	2.30292	5.56098	6.28406	6.10302	6.10629	4.60899	4.53152	2.30563	2.82586	1.7792	6.93261	8.35219	6.52197
VIT_03s0038g02500	SKP1	264.834	278.532	129.468	249.865	310.558	210.188	334.149	427.393	476.103	263.784	257.045	204.562	238.203	263.914	226.814	320.891	402.073	429.458	252.283	302.789	134.361	250.414	292.054	201.338	340.362	454.789	458.374
VIT_15s0046g02450	SKP1-like 21 ASK21	6.64827	7.02259	5.46615	6.41523	5.06457	5.54405	5.27651	4.6131	5.65694	8.31958	6.81669	6.42616	5.15523	5.35092	5.32517	6.05401	5.04813	5.15111	6.62142	5.43385	6.68438	5.70284	5.07687	6.06137	5.70921	5.51586	4.39744
VIT_18s0001g14860	SKP1	312.581	294.89	316.083	409.682	406.717	374.702	475.932	444.201	406.385	292.252	283.011	309.77	400.9	390.854	384.47	493.732	426.111	453.469	311.91	302.004	334.813	414.85	395.357	347.248	485.38	416.298	389.723
VIT_03s0063g02110	RUB1-conjugating enzyme	394.179	387.962	408.908	308.762	329.679	302.07	217.269	295.215	285.424	334.976	374.063	421.487	292.536	286.245	282.249	208.286	262.117	261.773	377.952	413.763	435.176	340.612	320.805	342.079	220.92	291.574	279.954
VIT_04s0023g01280	RUB1 conjugating enzyme (RCE1)	71.7405	74.64	66.6646	66.8776	58.8567	71.2994	56.9575	69.7095	63.5588	71.3776	70.2423	69.8982	64.3602	66.288	65.3016	55.3403	64.3905	64.2258	69.3385	69.1287	72.4643	72.6218	63.9322	73.6058	53.6936	56.4836	65.5062
VIT_05s0020g01320	Cullin 1C	74.2322	70.1807	79.5768	89.5447	83.7244	86.1371	119.951	94.0784	90.9923	76.9839	74.1162	81.443	89.3112	92.0601	84.8081	121.089	98.7593	81.6211	70.7669	61.9236	82.4082	92.9269	86.45	84.4156	118.039	102.946	79.7635
VIT_05s0020g01340	Cullin-1	2.06907	1.96708	1.13002	0.421313	0.282049	0.328516	0.555589	1.12586	0.370934	2.17342	2.17441	1.24897	0.584408	0.414043	0.238098	0.148463	1.21515	0.560261	1.23371	2.0081	1.2623	0.587085	0.401083	0.235284	0.497617	1.18013	0.756319
VIT_05s0020g02820	Ubiquitin activating enzyme E1c (ECR1)	36.2381	33.7044	37.2683	57.7358	59.4409	64.1469	81.5462	85.5122	82.2181	35.7221	34.8673	36.5387	57.7262	54.6135	60.1576	85.2847	76.0429	72.2217	34.6379	38.1598	33.8774	54.9116	60.3253	55.0401	77.3877	75.4559	67.8157
VIT_07s0104g01590	Cullin-1	17.1386	17.0621	18.1572	23.1199	21.1343	23.4735	43.0666	36.8196	45.5429	16.8965	16.6719	17.6982	21.6146	24.9912	24.928	44.0222	37.806	48.5675	16.528	14.752	18.0047	25.6804	23.1316	22.0388	44.473	44.148	35.8871
[truncated: 1,168 more rows]

## Sheet: Nucleic acid metabolism
Table S5. c) List of genes belonging to the functional category of DNA/RNA metabolic process and Transcription factor activity (GO:0006139, GO:0006350 and GO:0051090).
[truncated: 3,543 more rows]

[truncated: 11 more sheets: Energy metabolism, Lipid metabolism, Organic acid metabolism, Secondary metabolism, Hormone metabolism, Amino acid metabolism, Development, Transport, Cell signalling and homeostasis, Stress response, No hit]
